# Supplementary material for: Multi-Omics Analysis of the Effects of Smoking on Human Tumors
Source: Front Mol Biosci. 2021 Nov 2;8:704910. doi: 10.3389/fmolb.2021.704910 (PMC8592943; doi:10.3389/fmolb.2021.704910)
Supplement: Supplementary file 11 [file DataSheet2.XLSX]

## Sheet: Sheet1 GSEA
Former smoker vs non-smoker
NAME	GS<br> follow link to MSigDB	GS DETAILS	SIZE	ES	NES	NOM p-val	FDR q-val	FWER p-val	RANK AT MAX	LEADING EDGE
CSR_EARLY_UP.V1_DN	CSR_EARLY_UP.V1_DN	Details ...	126	-0.467553	-1.62592	0.0318725	0.245961	0.372	6536	tags=40%, list=12%, signal=45%
BMI1_DN_MEL18_DN.V1_DN	BMI1_DN_MEL18_DN.V1_DN	Details ...	146	-0.445193	-1.59278	0.027027	0.246916	0.401	8137	tags=34%, list=14%, signal=40%
CRX_NRL_DN.V1_UP	CRX_NRL_DN.V1_UP	Details ...	139	-0.399084	-1.59105	0.0162933	0.213871	0.405	5729	tags=30%, list=10%, signal=34%
IL2_UP.V1_DN	IL2_UP.V1_DN	Details ...	188	-0.398704	-1.50594	0.0483193	0.241919	0.513	7219	tags=37%, list=13%, signal=43%
CSR_EARLY_UP.V1_UP	CSR_EARLY_UP.V1_UP	Details ...	152	0.577359	2.06833	0.00201613	0.0463236	0.03	7730	tags=48%, list=14%, signal=55%
VEGF_A_UP.V1_DN	VEGF_A_UP.V1_DN	Details ...	192	0.601184	2.00315	0.00588235	0.0559752	0.056	7729	tags=52%, list=14%, signal=60%
MTOR_UP.V1_UP	MTOR_UP.V1_UP	Details ...	169	0.509993	1.97889	0	0.0516799	0.068	5065	tags=33%, list=9%, signal=36%
NFE2L2.V2	NFE2L2.V2	Details ...	467	0.442928	1.81856	0.00573614	0.158462	0.185	6645	tags=32%, list=12%, signal=36%
RB_DN.V1_DN	RB_DN.V1_DN	Details ...	123	0.50935	1.81726	0.023301	0.129092	0.188	7046	tags=40%, list=12%, signal=45%
PDGF_UP.V1_UP	PDGF_UP.V1_UP	Details ...	144	0.441529	1.77587	0.0177515	0.150151	0.227	7636	tags=35%, list=14%, signal=41%
HOXA9_DN.V1_DN	HOXA9_DN.V1_DN	Details ...	188	0.491695	1.76903	0.0215686	0.136132	0.236	8879	tags=39%, list=16%, signal=47%
KRAS.DF.V1_DN	KRAS.DF.V1_DN	Details ...	192	0.440205	1.75973	0.00201207	0.128777	0.247	8055	tags=35%, list=14%, signal=41%
ALK_DN.V1_UP	ALK_DN.V1_UP	Details ...	140	0.471068	1.75358	0.0172745	0.120227	0.256	8591	tags=40%, list=15%, signal=47%
E2F3_UP.V1_DN	E2F3_UP.V1_DN	Details ...	158	0.427181	1.74819	0.0132827	0.113066	0.266	9336	tags=37%, list=17%, signal=44%
MEL18_DN.V1_UP	MEL18_DN.V1_UP	Details ...	141	0.544158	1.66906	0.0474308	0.163701	0.346	9073	tags=47%, list=16%, signal=56%
PRC2_EZH2_UP.V1_UP	PRC2_EZH2_UP.V1_UP	Details ...	192	0.441319	1.6645	0.0246212	0.1545	0.354	5026	tags=29%, list=9%, signal=31%
BMI1_DN_MEL18_DN.V1_UP	BMI1_DN_MEL18_DN.V1_UP	Details ...	145	0.541635	1.66314	0.0453649	0.145196	0.358	5599	tags=39%, list=10%, signal=43%
MTOR_UP.N4.V1_UP	MTOR_UP.N4.V1_UP	Details ...	196	0.413704	1.58795	0.045283	0.19156	0.448	7489	tags=33%, list=13%, signal=38%
ESC_V6.5_UP_LATE.V1_DN	ESC_V6.5_UP_LATE.V1_DN	Details ...	178	0.387468	1.57513	0.0300188	0.173735	0.458	8024	tags=38%, list=14%, signal=44%
ESC_J1_UP_LATE.V1_DN	ESC_J1_UP_LATE.V1_DN	Details ...	166	0.373297	1.50432	0.0484496	0.196124	0.53	7646	tags=31%, list=14%, signal=36%
JAK2_DN.V1_UP	JAK2_DN.V1_UP	Details ...	182	0.337289	1.43097	0.0467836	0.212009	0.616	6711	tags=26%, list=12%, signal=29%
Current smoker vs non-smoker
NAME	GS<br> follow link to MSigDB	GS DETAILS	SIZE	ES	NES	NOM p-val	FDR q-val	FWER p-val	RANK AT MAX	LEADING EDGE
LEF1_UP.V1_DN	LEF1_UP.V1_DN	Details ...	185	-0.594049	-2.07373	0.00197239	0.0395158	0.026	8021	tags=51%, list=14%, signal=59%
ESC_J1_UP_LATE.V1_UP	ESC_J1_UP_LATE.V1_UP	Details ...	185	-0.575779	-2.01228	0.00198807	0.046697	0.046	8974	tags=48%, list=16%, signal=56%
BMI1_DN_MEL18_DN.V1_DN	BMI1_DN_MEL18_DN.V1_DN	Details ...	146	-0.549	-1.97097	0.00398406	0.0456318	0.057	7681	tags=42%, list=14%, signal=48%
MEL18_DN.V1_DN	MEL18_DN.V1_DN	Details ...	146	-0.520253	-1.88442	0.00793651	0.0786601	0.113	9150	tags=46%, list=16%, signal=55%
ESC_V6.5_UP_LATE.V1_UP	ESC_V6.5_UP_LATE.V1_UP	Details ...	181	-0.504505	-1.86314	0.011583	0.0781628	0.121	8975	tags=46%, list=16%, signal=54%
ERBB2_UP.V1_UP	ERBB2_UP.V1_UP	Details ...	190	-0.525537	-1.86189	0.01875	0.0658777	0.123	9910	tags=49%, list=18%, signal=60%
BMI1_DN.V1_DN	BMI1_DN.V1_DN	Details ...	139	-0.480133	-1.82849	0.00980392	0.076465	0.154	9849	tags=45%, list=17%, signal=55%
KRAS.BREAST_UP.V1_DN	KRAS.BREAST_UP.V1_DN	Details ...	143	-0.486588	-1.82227	0.00196078	0.0697338	0.156	8277	tags=36%, list=15%, signal=42%
IL2_UP.V1_DN	IL2_UP.V1_DN	Details ...	188	-0.477382	-1.79965	0.00992064	0.0760097	0.184	8025	tags=38%, list=14%, signal=44%
ATF2_S_UP.V1_DN	ATF2_S_UP.V1_DN	Details ...	185	-0.521421	-1.79226	0.0202429	0.0745908	0.194	8046	tags=44%, list=14%, signal=52%
RPS14_DN.V1_UP	RPS14_DN.V1_UP	Details ...	190	-0.604944	-1.78364	0.0242424	0.0722252	0.202	8170	tags=54%, list=14%, signal=63%
PTEN_DN.V1_DN	PTEN_DN.V1_DN	Details ...	183	-0.449491	-1.77496	0.00383142	0.0714586	0.218	6698	tags=30%, list=12%, signal=34%
VEGF_A_UP.V1_UP	VEGF_A_UP.V1_UP	Details ...	195	-0.475396	-1.7607	0.0176817	0.0724519	0.235	11684	tags=46%, list=21%, signal=58%
BCAT_GDS748_UP	BCAT_GDS748_UP	Details ...	48	-0.515591	-1.75871	0.02	0.0681748	0.237	8662	tags=40%, list=15%, signal=47%
KRAS.AMP.LUNG_UP.V1_DN	KRAS.AMP.LUNG_UP.V1_DN	Details ...	142	-0.452374	-1.72226	0.00785855	0.0828936	0.287	6848	tags=32%, list=12%, signal=36%
ATM_DN.V1_DN	ATM_DN.V1_DN	Details ...	144	-0.424242	-1.67345	0.00963391	0.110789	0.337	7411	tags=32%, list=13%, signal=37%
GCNP_SHH_UP_EARLY.V1_DN	GCNP_SHH_UP_EARLY.V1_DN	Details ...	167	-0.436584	-1.66089	0.0186335	0.113582	0.352	7806	tags=32%, list=14%, signal=37%
STK33_SKM_DN	STK33_SKM_DN	Details ...	272	-0.416179	-1.64794	0.0238095	0.115787	0.36	8553	tags=36%, list=15%, signal=42%
KRAS.50_UP.V1_UP	KRAS.50_UP.V1_UP	Details ...	48	-0.52892	-1.64412	0.0318725	0.106546	0.364	10427	tags=46%, list=18%, signal=56%
KRAS.KIDNEY_UP.V1_UP	KRAS.KIDNEY_UP.V1_UP	Details ...	141	-0.485696	-1.63877	0.0371094	0.105974	0.373	6259	tags=31%, list=11%, signal=35%
LTE2_UP.V1_UP	LTE2_UP.V1_UP	Details ...	188	-0.444225	-1.63759	0.0465587	0.10201	0.374	8186	tags=41%, list=14%, signal=48%
KRAS.AMP.LUNG_UP.V1_UP	KRAS.AMP.LUNG_UP.V1_UP	Details ...	140	-0.437162	-1.62942	0.0149813	0.102558	0.384	8567	tags=34%, list=15%, signal=40%
STK33_SKM_UP	STK33_SKM_UP	Details ...	273	-0.46707	-1.62579	0.046	0.101394	0.389	6020	tags=35%, list=11%, signal=39%
AKT_UP.V1_DN	AKT_UP.V1_DN	Details ...	187	-0.435188	-1.61995	0.0440882	0.100692	0.396	11224	tags=47%, list=20%, signal=58%
KRAS.KIDNEY_UP.V1_DN	KRAS.KIDNEY_UP.V1_DN	Details ...	133	-0.430379	-1.61857	0.0212314	0.0977428	0.4	6293	tags=29%, list=11%, signal=32%
KRAS.PROSTATE_UP.V1_UP	KRAS.PROSTATE_UP.V1_UP	Details ...	137	-0.430858	-1.60491	0.00806452	0.102241	0.422	9685	tags=38%, list=17%, signal=46%
P53_DN.V2_UP	P53_DN.V2_UP	Details ...	148	-0.419233	-1.60262	0.0327553	0.0999665	0.423	5941	tags=33%, list=11%, signal=37%
KRAS.600_UP.V1_UP	KRAS.600_UP.V1_UP	Details ...	278	-0.421143	-1.58738	0.0357143	0.101922	0.436	9375	tags=36%, list=17%, signal=43%
IL21_UP.V1_DN	IL21_UP.V1_DN	Details ...	185	-0.40234	-1.58504	0.0155642	0.100102	0.438	12328	tags=42%, list=22%, signal=53%
JNK_DN.V1_UP	JNK_DN.V1_UP	Details ...	185	-0.414162	-1.57573	0.0392157	0.103153	0.453	3480	tags=24%, list=6%, signal=26%
PDGF_UP.V1_DN	PDGF_UP.V1_DN	Details ...	131	-0.40187	-1.57109	0.036965	0.102818	0.459	6397	tags=29%, list=11%, signal=33%
YAP1_UP	YAP1_UP	Details ...	47	-0.449327	-1.56797	0.0440882	0.101167	0.46	7524	tags=32%, list=13%, signal=37%
PRC2_EED_UP.V1_UP	PRC2_EED_UP.V1_UP	Details ...	191	-0.405941	-1.56242	0.0352941	0.0983745	0.466	9056	tags=32%, list=16%, signal=39%
STK33_NOMO_DN	STK33_NOMO_DN	Details ...	276	-0.401072	-1.55874	0.0374016	0.0976706	0.468	8849	tags=36%, list=16%, signal=42%
IL15_UP.V1_DN	IL15_UP.V1_DN	Details ...	182	-0.392628	-1.5491	0.0389105	0.0976352	0.475	9567	tags=39%, list=17%, signal=47%
STK33_DN	STK33_DN	Details ...	276	-0.384518	-1.5229	0.0416667	0.103219	0.507	8933	tags=35%, list=16%, signal=41%
KRAS.300_UP.V1_UP	KRAS.300_UP.V1_UP	Details ...	142	-0.420409	-1.51865	0.0493097	0.100886	0.513	9375	tags=37%, list=17%, signal=44%
NOTCH_DN.V1_DN	NOTCH_DN.V1_DN	Details ...	183	-0.388687	-1.49269	0.0448065	0.108202	0.538	7661	tags=33%, list=14%, signal=38%
CTIP_DN.V1_UP	CTIP_DN.V1_UP	Details ...	134	-0.379677	-1.45945	0.046332	0.113668	0.577	6673	tags=28%, list=12%, signal=31%
CSR_LATE_UP.V1_UP	CSR_LATE_UP.V1_UP	Details ...	166	0.599726	1.99544	0.0117417	0.0525422	0.062	3613	tags=42%, list=6%, signal=44%
RB_P107_DN.V1_UP	RB_P107_DN.V1_UP	Details ...	130	0.633233	1.98057	0.0178571	0.0304343	0.071	5491	tags=48%, list=10%, signal=53%
E2F1_UP.V1_UP	E2F1_UP.V1_UP	Details ...	188	0.562543	1.96905	0.00817996	0.0217029	0.074	6082	tags=41%, list=11%, signal=46%
PRC2_EED_UP.V1_DN	PRC2_EED_UP.V1_DN	Details ...	193	0.544748	1.95369	0	0.0192761	0.082	5955	tags=42%, list=11%, signal=47%
RPS14_DN.V1_DN	RPS14_DN.V1_DN	Details ...	186	0.54844	1.91707	0.0140281	0.0233583	0.11	5009	tags=39%, list=9%, signal=43%
PRC2_EZH2_UP.V1_DN	PRC2_EZH2_UP.V1_DN	Details ...	192	0.505968	1.87024	0.0123203	0.0307313	0.14	4194	tags=33%, list=7%, signal=36%
GCNP_SHH_UP_LATE.V1_UP	GCNP_SHH_UP_LATE.V1_UP	Details ...	181	0.515583	1.83929	0.0281125	0.0348265	0.167	8574	tags=46%, list=15%, signal=54%
MTOR_UP.V1_UP	MTOR_UP.V1_UP	Details ...	169	0.454381	1.78209	0.00403226	0.0478669	0.214	6784	tags=37%, list=12%, signal=42%
VEGF_A_UP.V1_DN	VEGF_A_UP.V1_DN	Details ...	192	0.516221	1.74603	0.0464646	0.0574018	0.244	4685	tags=38%, list=8%, signal=41%
CSR_EARLY_UP.V1_UP	CSR_EARLY_UP.V1_UP	Details ...	152	0.48146	1.71297	0.0353635	0.065353	0.275	7862	tags=43%, list=14%, signal=50%
PDGF_ERK_DN.V1_DN	PDGF_ERK_DN.V1_DN	Details ...	146	0.432347	1.71289	0.0213592	0.0594421	0.275	5483	tags=34%, list=10%, signal=38%
KRAS.50_UP.V1_DN	KRAS.50_UP.V1_DN	Details ...	47	0.512671	1.70643	0.0234834	0.0567459	0.281	4940	tags=34%, list=9%, signal=37%
KRAS.LUNG_UP.V1_DN	KRAS.LUNG_UP.V1_DN	Details ...	140	0.467088	1.67397	0.0208333	0.066405	0.332	5566	tags=35%, list=10%, signal=39%
RB_DN.V1_UP	RB_DN.V1_UP	Details ...	117	0.445679	1.66579	0.0318725	0.0655352	0.337	5041	tags=32%, list=9%, signal=36%
HOXA9_DN.V1_DN	HOXA9_DN.V1_DN	Details ...	188	0.46497	1.6416	0.0434783	0.0715206	0.358	5901	tags=36%, list=10%, signal=40%
SRC_UP.V1_DN	SRC_UP.V1_DN	Details ...	167	0.401529	1.6249	0.0152672	0.0743576	0.373	6884	tags=32%, list=12%, signal=37%
ESC_J1_UP_LATE.V1_DN	ESC_J1_UP_LATE.V1_DN	Details ...	166	0.397535	1.59371	0.0216535	0.0843093	0.417	7281	tags=33%, list=13%, signal=38%
ATF2_UP.V1_UP	ATF2_UP.V1_UP	Details ...	188	0.385455	1.54607	0.0262626	0.0903232	0.475	3862	tags=25%, list=7%, signal=27%
E2F3_UP.V1_DN	E2F3_UP.V1_DN	Details ...	158	0.373698	1.52111	0.0289017	0.099194	0.506	5119	tags=28%, list=9%, signal=31%
NRL_DN.V1_UP	NRL_DN.V1_UP	Details ...	135	0.37359	1.50752	0.0330739	0.102932	0.531	7078	tags=33%, list=13%, signal=37%
ESC_J1_UP_EARLY.V1_DN	ESC_J1_UP_EARLY.V1_DN	Details ...	173	0.361491	1.46324	0.0440613	0.11129	0.581	6963	tags=35%, list=12%, signal=39%
Current smoker vs former smoker
NAME	GS<br> follow link to MSigDB	GS DETAILS	SIZE	ES	NES	NOM p-val	FDR q-val	FWER p-val	RANK AT MAX	LEADING EDGE
NFE2L2.V2	NFE2L2.V2	Details ...	467	0.44706	1.89912	0	0.170928	0.115	7377	tags=33%, list=13%, signal=38%
RB_DN.V1_DN	RB_DN.V1_DN	Details ...	123	0.527208	1.88353	0.0128755	0.128334	0.122	4907	tags=35%, list=9%, signal=38%
STK33_NOMO_UP	STK33_NOMO_UP	Details ...	289	0.535799	1.82719	0.0233546	0.150345	0.157	7476	tags=41%, list=13%, signal=47%
BMI1_DN_MEL18_DN.V1_UP	BMI1_DN_MEL18_DN.V1_UP	Details ...	145	0.569866	1.79785	0.0262097	0.150952	0.182	9998	tags=53%, list=18%, signal=64%
MTOR_UP.N4.V1_UP	MTOR_UP.N4.V1_UP	Details ...	196	0.446224	1.76212	0.0105263	0.164715	0.216	8625	tags=38%, list=15%, signal=45%
CYCLIN_D1_KE_.V1_DN	CYCLIN_D1_KE_.V1_DN	Details ...	189	0.423495	1.74137	0.00575816	0.168401	0.24	9291	tags=33%, list=16%, signal=39%
ATF2_UP.V1_DN	ATF2_UP.V1_DN	Details ...	184	0.49334	1.74025	0.0168776	0.149278	0.244	5779	tags=34%, list=10%, signal=37%
VEGF_A_UP.V1_DN	VEGF_A_UP.V1_DN	Details ...	192	0.520718	1.72199	0.0381356	0.150487	0.259	9875	tags=43%, list=17%, signal=52%
KRAS.600.LUNG.BREAST_UP.V1_UP	KRAS.600.LUNG.BREAST_UP.V1_UP	Details ...	279	0.423381	1.70147	0.0117878	0.157931	0.282	7637	tags=31%, list=14%, signal=36%
KRAS.600_UP.V1_UP	KRAS.600_UP.V1_UP	Details ...	278	0.439351	1.70119	0.0121212	0.14373	0.282	9627	tags=37%, list=17%, signal=44%
PTEN_DN.V1_DN	PTEN_DN.V1_DN	Details ...	183	0.41964	1.69956	0.0101626	0.133529	0.283	10272	tags=34%, list=18%, signal=41%
CAHOY_ASTROCYTIC	CAHOY_ASTROCYTIC	Details ...	100	0.435986	1.69938	0.0138067	0.123257	0.283	5634	tags=31%, list=10%, signal=34%
EGFR_UP.V1_UP	EGFR_UP.V1_UP	Details ...	192	0.511771	1.69561	0.046748	0.117193	0.286	10068	tags=46%, list=18%, signal=56%
BMI1_DN.V1_UP	BMI1_DN.V1_UP	Details ...	147	0.530944	1.68127	0.0408998	0.120195	0.301	6576	tags=39%, list=12%, signal=44%
CAMP_UP.V1_DN	CAMP_UP.V1_DN	Details ...	198	0.44476	1.65982	0.0444915	0.110399	0.33	6813	tags=30%, list=12%, signal=34%
KRAS.300_UP.V1_UP	KRAS.300_UP.V1_UP	Details ...	142	0.447603	1.65789	0.0178926	0.106492	0.331	9627	tags=38%, list=17%, signal=46%
KRAS.KIDNEY_UP.V1_UP	KRAS.KIDNEY_UP.V1_UP	Details ...	141	0.49287	1.64818	0.0338266	0.107347	0.34	8547	tags=41%, list=15%, signal=48%
MTOR_UP.V1_UP	MTOR_UP.V1_UP	Details ...	169	0.416227	1.64403	0.0202429	0.10534	0.344	5138	tags=25%, list=9%, signal=28%
KRAS.50_UP.V1_UP	KRAS.50_UP.V1_UP	Details ...	48	0.520735	1.64258	0.033264	0.101698	0.344	6940	tags=35%, list=12%, signal=40%
PDGF_UP.V1_UP	PDGF_UP.V1_UP	Details ...	144	0.412845	1.63845	0.035865	0.100127	0.348	9878	tags=38%, list=17%, signal=45%
KRAS.BREAST_UP.V1_UP	KRAS.BREAST_UP.V1_UP	Details ...	138	0.431022	1.6321	0.0243408	0.0997786	0.355	9658	tags=38%, list=17%, signal=46%
BCAT_GDS748_UP	BCAT_GDS748_UP	Details ...	48	0.482506	1.62964	0.0251046	0.0978696	0.362	3525	tags=27%, list=6%, signal=29%
NRL_DN.V1_DN	NRL_DN.V1_DN	Details ...	132	0.396965	1.62639	0.0277186	0.0961771	0.366	8397	tags=31%, list=15%, signal=36%
KRAS.DF.V1_DN	KRAS.DF.V1_DN	Details ...	192	0.401611	1.62272	0.0186722	0.0946137	0.368	9775	tags=36%, list=17%, signal=43%
SIRNA_EIF4GI_DN	SIRNA_EIF4GI_DN	Details ...	97	0.446679	1.61884	0.0486258	0.0929617	0.37	10344	tags=42%, list=18%, signal=52%
PKCA_DN.V1_DN	PKCA_DN.V1_DN	Details ...	154	0.396051	1.60924	0.0120724	0.0957246	0.378	7498	tags=31%, list=13%, signal=35%
KRAS.LUNG_UP.V1_UP	KRAS.LUNG_UP.V1_UP	Details ...	139	0.418208	1.60108	0.0262626	0.0947955	0.385	5715	tags=29%, list=10%, signal=33%
KRAS.LUNG.BREAST_UP.V1_UP	KRAS.LUNG.BREAST_UP.V1_UP	Details ...	141	0.428606	1.59307	0.0383142	0.0959435	0.391	9627	tags=37%, list=17%, signal=44%
PRC2_EZH2_UP.V1_UP	PRC2_EZH2_UP.V1_UP	Details ...	192	0.435645	1.59188	0.0368852	0.0935391	0.392	10798	tags=39%, list=19%, signal=48%
RAF_UP.V1_DN	RAF_UP.V1_DN	Details ...	192	0.42912	1.58866	0.049896	0.0924592	0.398	10027	tags=41%, list=18%, signal=50%
E2F3_UP.V1_DN	E2F3_UP.V1_DN	Details ...	158	0.394826	1.5824	0.024	0.093626	0.403	9487	tags=35%, list=17%, signal=42%
P53_DN.V2_UP	P53_DN.V2_UP	Details ...	148	0.411151	1.57819	0.0261569	0.0933911	0.408	10098	tags=36%, list=18%, signal=44%
PRC2_EED_UP.V1_UP	PRC2_EED_UP.V1_UP	Details ...	191	0.398103	1.57479	0.0206186	0.0925776	0.409	9615	tags=32%, list=17%, signal=38%
MEK_UP.V1_UP	MEK_UP.V1_UP	Details ...	195	0.434565	1.56111	0.0425532	0.0981149	0.425	9101	tags=36%, list=16%, signal=43%
IL2_UP.V1_UP	IL2_UP.V1_UP	Details ...	186	0.390569	1.53947	0.044	0.103624	0.456	8936	tags=35%, list=16%, signal=41%
PIGF_UP.V1_DN	PIGF_UP.V1_DN	Details ...	190	0.367144	1.52025	0.0437376	0.110075	0.479	5993	tags=24%, list=11%, signal=26%
IL21_UP.V1_UP	IL21_UP.V1_UP	Details ...	183	0.369773	1.51874	0.0321285	0.108604	0.482	10395	tags=37%, list=18%, signal=45%
CRX_NRL_DN.V1_DN	CRX_NRL_DN.V1_DN	Details ...	126	0.373706	1.50226	0.0466102	0.111832	0.502	7680	tags=30%, list=14%, signal=35%

## Sheet: Sheet2 DEmRNAs+DElncRNAs
Former smoker vs non-smoker			Current smoker vs non-smoker			Current smoker vs former smoker			Intersection
Gene	Type		Gene	Type		Gene	Type		Gene	Type
MOGAT3	down-regulated		SLC22A7	down-regulated		CEACAM8	down-regulated		PNCK	mRNAup
CYP4A11	down-regulated		DAO	down-regulated		ZP2	down-regulated		C10orf90	mRNAup
FABP2	down-regulated		ACSM2A	down-regulated		DAO	down-regulated		IRAK1	mRNAup
SLC22A7	down-regulated		SLC17A3	down-regulated		AL445183.2	down-regulated		HIC2	mRNAup
SLC12A1	down-regulated		ACSM2B	down-regulated		SEC14L3	down-regulated		PIR	mRNAup
PAX2	down-regulated		MOGAT3	down-regulated		CHIA	down-regulated		CDC25B	mRNAup
SLC26A3	down-regulated		ANKRD40CL	down-regulated		SERTM2	down-regulated		NUDT1	mRNAup
SLC3A1	down-regulated		HAO2	down-regulated		RSPO2	down-regulated		GPR55	mRNAup
GLYAT	down-regulated		CYP4A11	down-regulated		AL117382.2	down-regulated		FOXE1	mRNAup
TM4SF20	down-regulated		GLYAT	down-regulated		AC013275.1	down-regulated		FOXM1	mRNAup
ACSM2A	down-regulated		SLC26A3	down-regulated		ANKS4B	down-regulated		C6orf15	mRNAup
CREB3L3	down-regulated		SLC3A1	down-regulated		F11	down-regulated		PLXNA1	mRNAup
ANKRD40CL	down-regulated		A1CF	down-regulated		GKN2	down-regulated		IL1F10	mRNAup
AC006141.1	down-regulated		FABP2	down-regulated		HCN1	down-regulated		STPG1	mRNAup
SLC17A3	down-regulated		LINC02274	down-regulated		IL37	down-regulated		CDCA4	mRNAup
LINC02274	down-regulated		LINC02532	down-regulated		LRRC31	down-regulated		ADAM23	mRNAup
A1CF	down-regulated		CCDC198	down-regulated		GGTLC1	down-regulated		SNAPC1	mRNAup
C21orf62	down-regulated		LRRC19	down-regulated		DNAH8	down-regulated		LRRC8A	mRNAup
AL589745.1	down-regulated		CLRN3	down-regulated		AP002358.2	down-regulated		AKR1B15	mRNAup
ACSM2B	down-regulated		C21orf62	down-regulated		AC133963.1	down-regulated		GSTP1	mRNAup
LINC00671	down-regulated		NAT8	down-regulated		ADGRF5P2	down-regulated		DCUN1D5	mRNAup
CHST5	down-regulated		KCNJ3	down-regulated		LINC02555	down-regulated		SPRR2B	mRNAup
ENPP7	down-regulated		SLC22A2	down-regulated		C9orf135	down-regulated		FKBP4	mRNAup
HAO2	down-regulated		LINC01320	down-regulated		BAAT	down-regulated		KRT15	mRNAup
AC099792.1	down-regulated		TMEM252	down-regulated		ANKRD66	down-regulated		MAD2L1	mRNAup
LRRC19	down-regulated		SLC12A1	down-regulated		PLA2G1B	down-regulated		EIF4A3	mRNAup
COL18A1-AS1	down-regulated		POU3F3	down-regulated		TMEM132D	down-regulated		C1orf112	mRNAup
SMLR1	down-regulated		SMIM32	down-regulated		LINC02532	down-regulated		RAB38	mRNAup
F8A3	down-regulated		TMEM82	down-regulated		CNTN6	down-regulated		LGALS7B	mRNAup
SLC28A1	down-regulated		SLC28A1	down-regulated		SHISA3	down-regulated		AHRR	mRNAup
LINC01320	down-regulated		ADAMTS9-AS1	down-regulated		PLA2G12B	down-regulated		PDAP1	mRNAup
SLC22A2	down-regulated		AC147651.2	down-regulated		GRIA1	down-regulated		ZAN	mRNAup
SMIM32	down-regulated		TMEM72	down-regulated		AC046195.1	down-regulated		ENTPD7	mRNAup
AC147651.2	down-regulated		AC126603.1	down-regulated		C6	down-regulated		FETUB	mRNAup
PCK1	down-regulated		KCNJ13	down-regulated		CLRN3	down-regulated		DCTN1	mRNAup
EMX2OS	down-regulated		AC099792.1	down-regulated		TTLL6	down-regulated		MRTO4	mRNAup
POU3F3	down-regulated		SMLR1	down-regulated		CFAP221	down-regulated		TCP1	mRNAup
CLRN3	down-regulated		SLC39A5	down-regulated		LINC02471	down-regulated		CENPL	mRNAup
TMEM252	down-regulated		LINC00671	down-regulated		GGTLC2	down-regulated		FST	mRNAup
NAT8	down-regulated		ENPP7	down-regulated		CYP2A13	down-regulated		LDLR	mRNAup
DAO	down-regulated		AC006141.1	down-regulated		SCN7A	down-regulated		KIAA0930	mRNAup
GLYATL1	down-regulated		AC021218.1	down-regulated		AGTR2	down-regulated		POLR3G	mRNAup
AC021218.1	down-regulated		SLC22A11	down-regulated		PCDH20	down-regulated		TMEM189	mRNAup
TRIM10	down-regulated		TINAG	down-regulated		R3HDML	down-regulated		CD177	mRNAup
LINC02532	down-regulated		CDHR5	down-regulated		TRIM71	down-regulated		MYCL	mRNAup
CCDC198	down-regulated		ACMSD	down-regulated		LRRC37A11P	down-regulated		KMT5A	mRNAup
LINC01693	down-regulated		GLYATL1	down-regulated		HTR4	down-regulated		SQLE	mRNAup
MIR194-2HG	down-regulated		AL589745.1	down-regulated		AC012409.5	down-regulated		PARD6G	mRNAup
SLC39A5	down-regulated		PAX2	down-regulated		PTCSC3	down-regulated		IQANK1	mRNAup
KCNJ3	down-regulated		ANKS4B	down-regulated		SCTR	down-regulated		HNRNPK	mRNAup
PDZD3	down-regulated		CHST5	down-regulated		CCDC198	down-regulated		ICE1	mRNAup
KCNJ13	down-regulated		CEACAM8	down-regulated		TMEM82	down-regulated		ZNF750	mRNAup
CYP4A22	down-regulated		PDZD3	down-regulated		NT5C1A	down-regulated		BTBD10	mRNAup
PKLR	down-regulated		PKLR	down-regulated		SULT1C2P1	down-regulated		SDK2	mRNAup
AC087257.1	down-regulated		GBA3	down-regulated		PIH1D3	down-regulated		KRT74	mRNAup
CDHR5	down-regulated		AC023389.3	down-regulated		FAM216B	down-regulated		DSC1	mRNAup
NR1H4	down-regulated		REG1A	down-regulated		SNTN	down-regulated		TBCCD1	mRNAup
FAM135B	down-regulated		FCAMR	down-regulated		MROH9	down-regulated		THEG	mRNAup
HNF4A	down-regulated		FILNC1	down-regulated		GPR31	down-regulated		TMEM132A	mRNAup
KAAG1	down-regulated		SERPINA6	down-regulated		C8orf34	down-regulated		WNT10B	mRNAup
CLEC18C	down-regulated		AC098476.1	down-regulated		CYP4F24P	down-regulated		GBX2	mRNAup
SIM1	down-regulated		HNF4A	down-regulated		C8B	down-regulated		GAL	mRNAup
SERPINA6	down-regulated		CREB3L3	down-regulated		DPYS	down-regulated		AC036214.3	mRNAup
EMX2	down-regulated		NR1H4	down-regulated		HNF1A-AS1	down-regulated		ADCYAP1R1	mRNAup
FXYD2	down-regulated		LINC01625	down-regulated		CASR	down-regulated		CBX2	mRNAup
CDHR2	down-regulated		CASR	down-regulated		SPINK13	down-regulated		DDX50	mRNAup
AC126603.1	down-regulated		HNF1A-AS1	down-regulated		C8orf34-AS1	down-regulated		TRIM16	mRNAup
MOGAT2	down-regulated		CYP4A22	down-regulated		FCAMR	down-regulated		ZFYVE9	mRNAup
AQP2	down-regulated		AC012409.1	down-regulated		AC098476.1	down-regulated		DNAJB11	mRNAup
TMEM82	down-regulated		MIR194-2HG	down-regulated		DIO1	down-regulated		FAM83A	mRNAup
ATP2B2	down-regulated		ALDOB	down-regulated		C1orf87	down-regulated		SERPINB11	mRNAup
KRT223P	down-regulated		AC087482.1	down-regulated		ART4	down-regulated		NDE1	mRNAup
PDZK1	down-regulated		PCK1	down-regulated		UCN3	down-regulated		SYNPO2L	mRNAup
NPY6R	down-regulated		UPP2	down-regulated		GLOD5	down-regulated		ATP11B	mRNAup
CDH16	down-regulated		FXYD2	down-regulated		AC090796.1	down-regulated		F2RL2	mRNAup
HNF1A	down-regulated		HNF1A	down-regulated		PCDHA13	down-regulated		LPAR3	mRNAup
MUC12	down-regulated		ERICH4	down-regulated		OCSTAMP	down-regulated		PNPLA3	mRNAup
TNMD	down-regulated		TTLL6	down-regulated		ADH1B	down-regulated		CSNK1E	mRNAup
ZNF587P1	down-regulated		KCNJ16	down-regulated		AC110741.1	down-regulated		PRMT5	mRNAup
GAL3ST3	down-regulated		FAM135B	down-regulated		CPB2	down-regulated		ETV3	mRNAup
MYO7B	down-regulated		TM4SF5	down-regulated		TSPAN19	down-regulated		KLK7	mRNAup
UPP2	down-regulated		BNIP5	down-regulated		HCN4	down-regulated		SH3PXD2B	mRNAup
AL031710.1	down-regulated		AC009779.5	down-regulated		MT1JP	down-regulated		IPPK	mRNAup
AL138847.2	down-regulated		CUBN	down-regulated		GLP1R	down-regulated		EGFR	mRNAup
PHYHIPL	down-regulated		F8A3	down-regulated		CYP2G1P	down-regulated		GALNT6	mRNAup
AC254629.1	down-regulated		TRIM10	down-regulated		CNMD	down-regulated		NDRG1	mRNAup
AC012409.1	down-regulated		AC097059.1	down-regulated		RERGL	down-regulated		CLASP1	mRNAup
ANXA13	down-regulated		NPY6R	down-regulated		ZIM2-AS1	down-regulated		FARP2	mRNAup
GALNT9	down-regulated		MYRF-AS1	down-regulated		AL445493.3	down-regulated		GPR161	mRNAup
TINAG	down-regulated		AC254629.1	down-regulated		ACMSD	down-regulated		WDR74	mRNAup
AC084781.1	down-regulated		LCMT1-AS2	down-regulated		TMEM72	down-regulated		NECTIN4	mRNAup
AC098476.1	down-regulated		TREH	down-regulated		TMEM212	down-regulated		ABCF1	mRNAup
AC087482.1	down-regulated		ACSM5	down-regulated		SRGAP3-AS2	down-regulated		FCF1	mRNAup
AL136164.3	down-regulated		SLC22A13	down-regulated		AC027130.1	down-regulated		LRP8	mRNAup
UGT2B7	down-regulated		LINC01693	down-regulated		AC009093.3	down-regulated		TTL	mRNAup
AVPR1B	down-regulated		AC005280.1	down-regulated		KCNJ3	down-regulated		ARHGEF4	mRNAup
XKR4	down-regulated		YWHAEP7	down-regulated		AC026992.2	down-regulated		ATXN7L3	mRNAup
TRIM15	down-regulated		AC022498.2	down-regulated		IL12B	down-regulated		EIF3J	mRNAup
AC009779.5	down-regulated		AL138847.2	down-regulated		AC099509.1	down-regulated		MFN1	mRNAup
AL355312.3	down-regulated		C6	down-regulated		AC026369.3	down-regulated		ABCC5	mRNAup
AC097059.1	down-regulated		ANXA13	down-regulated		AC010970.1	down-regulated		CDC45	mRNAup
SALL1	down-regulated		TMEM132E	down-regulated		HHLA2	down-regulated		CWC22	mRNAup
TM4SF5	down-regulated		AQP2	down-regulated		SPATA4	down-regulated		NRDC	mRNAup
AC092868.3	down-regulated		PHYHIPL	down-regulated		CD5L	down-regulated		NCL	mRNAup
EPS8L3	down-regulated		LINC00870	down-regulated		AC073862.5	down-regulated		DCAF13	mRNAup
TNXA	down-regulated		TNMD	down-regulated		PLD5	down-regulated		OTOP3	mRNAup
HNF1A-AS1	down-regulated		SULT1C2P1	down-regulated		CA1	down-regulated		DDX21	mRNAup
YWHAEP7	down-regulated		CCL15	down-regulated		SLC16A12	down-regulated		LIN9	mRNAup
AC005280.1	down-regulated		SLC16A12	down-regulated		BPI	down-regulated		ODC1	mRNAup
AC020923.1	down-regulated		AC104794.5	down-regulated		STMND1	down-regulated		COL4A6	mRNAup
ALDOB	down-regulated		AVPR1B	down-regulated		ANGPTL5	down-regulated		TNFRSF18	mRNAup
AC023794.4	down-regulated		PDZK1	down-regulated		MUCL3	down-regulated		IL36RN	mRNAup
FCAMR	down-regulated		CCR9	down-regulated		CCR9	down-regulated		SMCO1	mRNAup
RAP2CP1	down-regulated		AC104035.1	down-regulated		IYD	down-regulated		BRMS1L	mRNAup
CUBN	down-regulated		UGT2B7	down-regulated		GPC5	down-regulated		TSLP	mRNAup
KLHL14	down-regulated		NR1I2	down-regulated		RPL13AP17	down-regulated		ACAP2	mRNAup
AC020779.2	down-regulated		ENAM	down-regulated		AQP4	down-regulated		CEACAM19	mRNAup
CNDP1	down-regulated		MYO7B	down-regulated		CYP2B7P	down-regulated		TGM4	mRNAup
HOTTIP	down-regulated		SIM1	down-regulated		AC079015.1	down-regulated		TENT4A	mRNAup
IHH	down-regulated		SLC6A20	down-regulated		TMEM132E	down-regulated		MAGEA11	mRNAup
AC079915.1	down-regulated		COL18A1-AS1	down-regulated		HABP2	down-regulated		NPM3	mRNAup
AC005699.1	down-regulated		AL136164.3	down-regulated		LINC02324	down-regulated		ARPC5L	mRNAup
LINC00867	down-regulated		ASPA	down-regulated		AC008132.1	down-regulated		TCF20	mRNAup
MTND6P3	down-regulated		TNXA	down-regulated		AKAP14	down-regulated		OTULIN	mRNAup
GJD3	down-regulated		IHH	down-regulated		C1orf158	down-regulated		LIPK	mRNAup
ANKS4B	down-regulated		ZNF587P1	down-regulated		NMBR	down-regulated		WFDC12	mRNAup
ENPP7P8	down-regulated		HAVCR1	down-regulated		PLA2G2C	down-regulated		TMEM131L	mRNAup
SLC22A13	down-regulated		AC023794.4	down-regulated		ALDOB	down-regulated		TOMM40	mRNAup
TREH	down-regulated		MYO1A	down-regulated		ADRA1A	down-regulated		KRT79	mRNAup
SSTR5-AS1	down-regulated		AC011313.1	down-regulated		SFTPC	down-regulated		WNT7B	mRNAup
TTC21B-AS1	down-regulated		LINC02754	down-regulated		CDH10	down-regulated		DYNLT3	mRNAup
MYO1A	down-regulated		CYP2B6	down-regulated		LINC02126	down-regulated		TWIST1	mRNAup
AC087477.5	down-regulated		EPS8L3	down-regulated		CFAP299	down-regulated		CCT6A	mRNAup
FAM189A1	down-regulated		AC079915.1	down-regulated		CLDN18	down-regulated		SENP5	mRNAup
AC103563.2	down-regulated		ADGRG7	down-regulated		SLC9C2	down-regulated		CBFA2T3	mRNAup
CCDC13-AS1	down-regulated		NPY5R	down-regulated		PEBP4	down-regulated		XRCC2	mRNAup
AC092754.1	down-regulated		CYP17A1	down-regulated		APOBEC4	down-regulated		DSP	mRNAup
AC023794.5	down-regulated		PKHD1	down-regulated		AC005165.1	down-regulated		AKR1B10	mRNAup
ALDH1L1-AS2	down-regulated		AC239800.2	down-regulated		PGC	down-regulated		NOS1	mRNAup
AC005884.2	down-regulated		AC007638.2	down-regulated		AC020656.2	down-regulated		FUBP3	mRNAup
CASR	down-regulated		EMX2OS	down-regulated		GATA6-AS1	down-regulated		YARS2	mRNAup
AC106872.6	down-regulated		AL353751.1	down-regulated		AC105053.1	down-regulated		APCDD1L	mRNAup
LIPC	down-regulated		KAAG1	down-regulated		AL591178.1	down-regulated		ADGRG3	mRNAup
GAU1	down-regulated		MUC12	down-regulated		C2orf73	down-regulated		GJB6	mRNAup
AL353751.1	down-regulated		NSRP1P1	down-regulated		LHFPL3-AS2	down-regulated		HBEGF	mRNAup
ASPA	down-regulated		TDGF1	down-regulated		RGS22	down-regulated		DNASE1L3	mRNAup
LINC02086	down-regulated		LINC02526	down-regulated		MYOC	down-regulated		TRIM72	mRNAup
TRHDE-AS1	down-regulated		NKAIN3-IT1	down-regulated		PCDHAC2	down-regulated		OPN4	mRNAup
SMIM24	down-regulated		RPL23AP12	down-regulated		AC005592.1	down-regulated		NKRF	mRNAup
SLC6A20	down-regulated		DIO1	down-regulated		HSF5	down-regulated		VSNL1	mRNAup
TMEM246-AS1	down-regulated		AC012409.5	down-regulated		AP003064.2	down-regulated		MED10	mRNAup
AL157996.1	down-regulated		ANGPTL3	down-regulated		ADRB3	down-regulated		ECE2	mRNAup
ALDH8A1	down-regulated		NAT8B	down-regulated		AC010185.1	down-regulated		LHX5	mRNAup
AC020659.1	down-regulated		TTC21B-AS1	down-regulated		AL138899.1	down-regulated		OTX1	mRNAup
CCL15	down-regulated		CRX	down-regulated		VWA3B	down-regulated		ZIC4	mRNAup
LINC00870	down-regulated		AC084781.1	down-regulated		AC107081.3	down-regulated		SELE	mRNAup
AC016705.1	down-regulated		AC124067.4	down-regulated		AL162511.1	down-regulated		BPIFC	mRNAup
SMIM2-AS1	down-regulated		LINC02747	down-regulated		HHATL-AS1	down-regulated		NR5A1	mRNAup
THRB-IT1	down-regulated		LINC00494	down-regulated		A2MP1	down-regulated		SRP68	mRNAup
MAJIN	down-regulated		PPP1R1A	down-regulated		SLC28A2	down-regulated		UBR5	mRNAup
KRT18P61	down-regulated		AC092868.3	down-regulated		C7	down-regulated		CRYBA2	mRNAup
MIOX	down-regulated		AL022323.2	down-regulated		MTTP	down-regulated		SERPINB2	mRNAup
LINC02526	down-regulated		AL157996.1	down-regulated		HSPA8P18	down-regulated		RNF225	mRNAup
AL022323.2	down-regulated		CD5L	down-regulated		CD300LG	down-regulated		SAMD8	mRNAup
AC103702.1	down-regulated		ENPP7P8	down-regulated		AL592429.2	down-regulated		RBM14-RBM4	mRNAup
EMX1	down-regulated		KRT18P61	down-regulated		CLEC9A	down-regulated		NOP16	mRNAup
FAM3D-AS1	down-regulated		MYOC	down-regulated		C16orf89	down-regulated		EIF5A2	mRNAup
POTEG	down-regulated		AC005699.1	down-regulated		GGT3P	down-regulated		TGM3	mRNAup
FRMD1	down-regulated		AC020656.2	down-regulated		CYP17A1	down-regulated		HK1	mRNAup
AQP7P1	down-regulated		CNDP1	down-regulated		SFTPA1	down-regulated		ADAMTS20	mRNAup
GLDCP1	down-regulated		SLC13A2	down-regulated		SCGB3A2	down-regulated		CSE1L	mRNAup
ZFR2	down-regulated		GAU1	down-regulated		AC004832.1	down-regulated		DKC1	mRNAup
AC011443.1	down-regulated		CYP21A2	down-regulated		TMEM252	down-regulated		TMEM40	mRNAup
HNRNPA1P9	down-regulated		LRRC31	down-regulated		CBLN4	down-regulated		DNAJB6	mRNAup
AC124067.4	down-regulated		SLC5A9	down-regulated		NR1I2	down-regulated		MT1X	mRNAup
AL161669.1	down-regulated		TRIM15	down-regulated		AC091588.3	down-regulated		RFC4	mRNAup
TARDBPP2	down-regulated		KRT223P	down-regulated		MAP1LC3C	down-regulated		SULT4A1	mRNAup
SORCS1	down-regulated		LRP2	down-regulated		P2RY12	down-regulated		MIEF1	mRNAup
AC011511.3	down-regulated		ALDH8A1	down-regulated		MYOCD	down-regulated		RAP2B	mRNAup
ANGPTL3	down-regulated		AC015910.1	down-regulated		AL031280.1	down-regulated		NSDHL	mRNAup
TRHDE	down-regulated		KCTD4	down-regulated		LINC00643	down-regulated		LSS	mRNAup
RABGAP1L-IT1	down-regulated		AC020779.2	down-regulated		KCNK17	down-regulated		FXR1	mRNAup
CYP8B1	down-regulated		CTXND1	down-regulated		SLC1A7	down-regulated		PDPN	mRNAup
AC084782.2	down-regulated		MYRFL	down-regulated		C1QTNF7	down-regulated		TMA16	mRNAup
AC097504.2	down-regulated		AL033381.2	down-regulated		TTC29	down-regulated		DSC3	mRNAup
NEU4	down-regulated		ANKS1B	down-regulated		RIMS1	down-regulated		NIFK	mRNAup
VWA5B1	down-regulated		SMIM2-AS1	down-regulated		UMODL1-AS1	down-regulated		TPRG1	mRNAup
A4GNT	down-regulated		GALNT9	down-regulated		TIMD4	down-regulated		GLRX3	mRNAup
KCTD4	down-regulated		AC064807.2	down-regulated		LRRC18	down-regulated		MAPK6	mRNAup
NXNL2	down-regulated		GAL3ST1	down-regulated		SYNDIG1L	down-regulated		NUDT11	mRNAup
MTCO1P22	down-regulated		AC019257.1	down-regulated		SERPINA4	down-regulated		B3GNT4	mRNAup
LIPC-AS1	down-regulated		AC092868.2	down-regulated		OMG	down-regulated		DSCAM	mRNAup
HOXA9	down-regulated		SERPINA4	down-regulated		LINC02489	down-regulated		DIP2B	mRNAup
ATP6V0CP1	down-regulated		AC004815.1	down-regulated		HPR	down-regulated		GJA3	mRNAup
AC138123.1	down-regulated		MOGAT1	down-regulated		AP003080.1	down-regulated		GINS4	mRNAup
LCMT1-AS2	down-regulated		AC012409.3	down-regulated		AGRP	down-regulated		PUS7	mRNAup
AC093001.1	down-regulated		SLC6A12	down-regulated		OR7E102P	down-regulated		BAZ2A	mRNAup
AP002472.1	down-regulated		TRPC2	down-regulated		ACSM5	down-regulated		CEP76	mRNAup
ABCG5	down-regulated		CYP21A1P	down-regulated		AC130456.2	down-regulated		SLC4A1AP	mRNAup
MUC2	down-regulated		BHMT	down-regulated		LINC00891	down-regulated		GTF3C4	mRNAup
AC078880.3	down-regulated		CA1	down-regulated		AP007216.2	down-regulated		TMCC1	mRNAup
AC010205.1	down-regulated		FAM189A1	down-regulated		AL365209.1	down-regulated		NCAPD2	mRNAup
CLEC18A	down-regulated		EMX2	down-regulated		AC060834.1	down-regulated		C1orf74	mRNAup
SNRPFP1	down-regulated		LIPC	down-regulated		LMO3	down-regulated		PC	mRNAup
MTCO3P13	down-regulated		SMIM24	down-regulated		ABCC6P1	down-regulated		TMPRSS11F	mRNAup
TTLL6	down-regulated		LINC00501	down-regulated		APOH	down-regulated		FAM43A	mRNAup
AC138866.1	down-regulated		PRSS33	down-regulated		MACROD2	down-regulated		KLF14	mRNAup
PAX8	down-regulated		AC015845.2	down-regulated		ABCC13	down-regulated		FLRT2	mRNAup
NAT8B	down-regulated		AC011443.1	down-regulated		PGM5P4	down-regulated		ANAPC5	mRNAup
AC036108.2	down-regulated		NRG3	down-regulated		IHH	down-regulated		FAM210A	mRNAup
TRMT9B	down-regulated		KCNB1	down-regulated		RMDN2-AS1	down-regulated		NRIP3	mRNAup
AC093458.1	down-regulated		AC020923.1	down-regulated		AC133065.2	down-regulated		COL17A1	mRNAup
AC004080.4	down-regulated		CDH16	down-regulated		AC011453.1	down-regulated		XG	mRNAup
AP000790.1	down-regulated		DCDC2	down-regulated		SLC17A8	down-regulated		MKRN3	mRNAup
AC118755.1	down-regulated		CLEC18C	down-regulated		SLC18A1	down-regulated		IGFL3	mRNAup
TRABD2B	down-regulated		AC016705.1	down-regulated		RAD17P1	down-regulated		WDR5	mRNAup
BHMT	down-regulated		CCDC13-AS1	down-regulated		LINC01146	down-regulated		PSMD1	mRNAup
AC092162.3	down-regulated		AP001528.2	down-regulated		AC004836.1	down-regulated		NHSL1	mRNAup
TMEM132E	down-regulated		TMEM246-AS1	down-regulated		LRP2	down-regulated		CLDN20	mRNAup
EIF5P1	down-regulated		SULT1C2	down-regulated		KIAA2012	down-regulated		PHF20L1	mRNAup
MYRFL	down-regulated		KCTD16	down-regulated		MGAM2	down-regulated		SOWAHC	mRNAup
CYP4F8	down-regulated		MROCKI	down-regulated		GPM6A	down-regulated		ADIPOR2	mRNAup
ZNF541	down-regulated		SPINK13	down-regulated		SFTPA2	down-regulated		PPM1F	mRNAup
IGSF23	down-regulated		RNF186	down-regulated		ERICH4	down-regulated		TSR1	mRNAup
HOXB8	down-regulated		FIGNL2-DT	down-regulated		AC083805.1	down-regulated		FZD6	mRNAup
AC012409.3	down-regulated		AC027130.1	down-regulated		KIAA0408	down-regulated		PITX3	mRNAup
RHEX	down-regulated		DRC7	down-regulated		AL121748.1	down-regulated		FBXO45	mRNAup
ABCB1	down-regulated		ADAMTS9-AS2	down-regulated		MS4A8	down-regulated		CKAP5	mRNAup
AC099789.1	down-regulated		MTCO3P13	down-regulated		TREH	down-regulated		MORC2	mRNAup
AC148477.2	down-regulated		LINC02097	down-regulated		ABCC6P2	down-regulated		PPP1R14C	mRNAup
CYP3A4	down-regulated		SYT10	down-regulated		SLC5A9	down-regulated		HDGF	mRNAup
MTCYBP35	down-regulated		HNF1B	down-regulated		TEX26	down-regulated		KRT6B	mRNAup
AC097376.2	down-regulated		CTSLP3	down-regulated		LRRC36	down-regulated		CSAG2	mRNAup
AC105101.1	down-regulated		LINC02640	down-regulated		SLITRK3	down-regulated		TRMT10C	mRNAup
LINC02188	down-regulated		AP000790.1	down-regulated		AC008806.1	down-regulated		PPFIA4	mRNAup
KCNS1	down-regulated		PRR26	down-regulated		NAPSA	down-regulated		MAP4K4	mRNAup
AC010336.5	down-regulated		TRHDE-AS1	down-regulated		FAM81B	down-regulated		POPDC3	mRNAup
HOXC-AS3	down-regulated		GSG1	down-regulated		RPS29P11	down-regulated		TM4SF19	mRNAup
OLFM4	down-regulated		TRABD2B	down-regulated		SFTA3	down-regulated		GTF2H3	mRNAup
ADGRG7	down-regulated		MIOX	down-regulated		ENAM	down-regulated		NOTCH3	mRNAup
ANKS1B	down-regulated		TRIM50	down-regulated		LINC01844	down-regulated		ATP1B3	mRNAup
GRM8	down-regulated		AL033381.1	down-regulated		ADAMTS9-AS1	down-regulated		CRKL	mRNAup
RDH5	down-regulated		GAL3ST3	down-regulated		OLIG1	down-regulated		ANP32B	mRNAup
AC087477.2	down-regulated		AC087477.5	down-regulated		C15orf54	down-regulated		MYO18B	mRNAup
AC091151.1	down-regulated		AC138123.1	down-regulated		TCF21	down-regulated		SERPINB12	mRNAup
CYP21A1P	down-regulated		KBTBD11-OT1	down-regulated		GADL1	down-regulated		DHX36	mRNAup
AC096541.1	down-regulated		CYP8B1	down-regulated		HCG21	down-regulated		NUDCD1	mRNAup
PRR26	down-regulated		GPD1	down-regulated		STK32A-AS1	down-regulated		DAPL1	mRNAup
CDH22	down-regulated		ABCC6P1	down-regulated		AC008496.2	down-regulated		NPC1	mRNAup
AC103563.7	down-regulated		GRM8	down-regulated		OR7E29P	down-regulated		PITPNB	mRNAup
MTCO1P2	down-regulated		SLC7A9	down-regulated		DNAH12	down-regulated		PAK2	mRNAup
C1orf195	down-regulated		AC026992.2	down-regulated		TMEM130	down-regulated		WASF2	mRNAup
ARSF	down-regulated		POU5F1P4	down-regulated		LINC01781	down-regulated		PFDN2	mRNAup
AC009065.2	down-regulated		KLHDC7A	down-regulated		MEF2C-AS1	down-regulated		TNNT1	mRNAup
AC142086.6	down-regulated		RIPPLY1	down-regulated		ORM2	down-regulated		RAB7A	mRNAup
MTRNR2L9	down-regulated		HNRNPA1P9	down-regulated		LINC01936	down-regulated		EIF2B5	mRNAup
GALNT16	down-regulated		AC084880.3	down-regulated		HEMGN	down-regulated		TFIP11	mRNAup
CYP21A2	down-regulated		VWA5B1	down-regulated		PDX1	down-regulated		PIGX	mRNAup
AC025263.1	down-regulated		AC013275.1	down-regulated		SFTPB	down-regulated		TACC2	mRNAup
MIR30C2	down-regulated		AC008758.2	down-regulated		AC104435.2	down-regulated		CNBP	mRNAup
GDF5OS	down-regulated		ENPP7P11	down-regulated		VEPH1	down-regulated		NmRNAup155	mRNAup
MOGAT1	down-regulated		ZPLD2P	down-regulated		SPAG6	down-regulated		G2E3	mRNAup
LINC01978	down-regulated		MTND6P3	down-regulated		PCDHA12	down-regulated		SLC38A5	mRNAup
CU638689.4	down-regulated		IYD	down-regulated		C4BPA	down-regulated		RIOK1	mRNAup
AC025580.3	down-regulated		TIMD4	down-regulated		CFAP65	down-regulated		CAND1	mRNAup
AC103740.1	down-regulated		LINC01555	down-regulated		SEC14L6	down-regulated		TENM4	mRNAup
AL365259.1	down-regulated		KLKB1	down-regulated		KCNA5	down-regulated		MAP3K20	mRNAup
HAVCR1	down-regulated		AL391987.4	down-regulated		MKRN5P	down-regulated		KPNA2	mRNAup
AC114801.3	down-regulated		A4GNT	down-regulated		CUBN	down-regulated		DSCC1	mRNAup
RNF186	down-regulated		GPA33	down-regulated		ATP4B	down-regulated		BIRC5	mRNAup
MTND4P35	down-regulated		AC020659.1	down-regulated		LINC02266	down-regulated		TRA2B	mRNAup
AC009097.4	down-regulated		AC023794.5	down-regulated		HNF1B	down-regulated		EXOSC2	mRNAup
FOSL1P1	down-regulated		ABCB1	down-regulated		RPL7AP15	down-regulated		SLC6A15	mRNAup
LINC02097	down-regulated		GJB1	down-regulated		LINC01398	down-regulated		POLE3	mRNAup
PRSS33	down-regulated		LINC01978	down-regulated		AL451069.1	down-regulated		FRRS1	mRNAup
MROH7-TTC4	down-regulated		AC112512.1	down-regulated		LINC01374	down-regulated		AVEN	mRNAup
MTND6P22	down-regulated		AL031710.1	down-regulated		IL5RA	down-regulated		GPR19	mRNAup
AC092794.2	down-regulated		AC093627.7	down-regulated		AC092569.1	down-regulated		PRRC2B	mRNAup
PROK1	down-regulated		KL	down-regulated		ENPP7P11	down-regulated		PHLDA1	mRNAup
CABP1	down-regulated		AC103740.1	down-regulated		KIF26B-AS1	down-regulated		KRT37	mRNAup
AC084759.3	down-regulated		MUC3A	down-regulated		PNMA2	down-regulated		MFAP5	mRNAup
SATB2-AS1	down-regulated		AC027612.1	down-regulated		LINC01684	down-regulated		PLA2R1	mRNAup
MTND5P10	down-regulated		AC007277.1	down-regulated		AC121338.1	down-regulated		CBARP	mRNAup
SH3GL2	down-regulated		AC005884.2	down-regulated		KIF6	down-regulated		PERP	mRNAup
AC092868.2	down-regulated		RABGAP1L-IT1	down-regulated		CRYM	down-regulated		SERTAD2	mRNAup
MYOM3	down-regulated		HGD	down-regulated		MAP3K19	down-regulated		YWHAZ	mRNAup
AL138688.2	down-regulated		AC025580.3	down-regulated		CDKL2	down-regulated		OPA1	mRNAup
SSTR5	down-regulated		CHST13	down-regulated		FMO5	down-regulated		IFI16	mRNAup
REV3L-IT1	down-regulated		AC096541.1	down-regulated		LINC01778	down-regulated		CSTA	mRNAup
MTRNR2L6	down-regulated		HOGA1	down-regulated		AC003991.1	down-regulated		CLTCL1	mRNAup
CEACAMP5	down-regulated		ILDR2	down-regulated		CST5	down-regulated		LAMB3	mRNAup
MTND3P25	down-regulated		MEGF11	down-regulated		TAT	down-regulated		SPRR2F	mRNAup
RPL7AP3	down-regulated		GALNT16	down-regulated		ADAMTS9-AS2	down-regulated		KRT77	mRNAup
AC100793.2	down-regulated		SGK2	down-regulated		HMGCLL1	down-regulated		PAX1	mRNAup
AL391987.4	down-regulated		DMGDH	down-regulated		DYNLRB2	down-regulated		MSANTD3	mRNAup
AC012513.2	down-regulated		LINC02365	down-regulated		AC130469.1	down-regulated		SPRR4	mRNAup
AL021391.1	down-regulated		LHFPL3-AS2	down-regulated		TREHP1	down-regulated		SLCO1B1	mRNAup
AC239800.2	down-regulated		FAM3D-AS1	down-regulated		PLPPR3	down-regulated		TEX10	mRNAup
SOWAHA	down-regulated		FGF20	down-regulated		ORM1	down-regulated		GPR1	mRNAup
SYPL2	down-regulated		ARHGAP29-AS1	down-regulated		LINC02038	down-regulated		EPHB3	mRNAup
AC005410.1	down-regulated		AC004947.2	down-regulated		FILNC1	down-regulated		XPOT	mRNAup
AC008514.1	down-regulated		NPY1R	down-regulated		IFNL3P1	down-regulated		IL36G	mRNAup
AC084880.3	down-regulated		ENPP3	down-regulated		NR0B2	down-regulated		DHCR7	mRNAup
CYP4F60P	down-regulated		MOGAT2	down-regulated		HGD	down-regulated		TMPRSS11D	mRNAup
RN7SL180P	down-regulated		UGT2B11	down-regulated		ANTXRL	down-regulated		CHST2	mRNAup
AC092620.1	down-regulated		ABCC6P2	down-regulated		AC073346.2	down-regulated		PGLYRP4	mRNAup
SLC6A12	down-regulated		AC103563.2	down-regulated		SCARNA5	down-regulated		NAA15	mRNAup
AC019257.1	down-regulated		AC079015.1	down-regulated		AC026992.1	down-regulated		BCL11B	mRNAup
SHLD2P1	down-regulated		SEC14L6	down-regulated		TRPC5OS	down-regulated		BNIPL	mRNAup
CCR9	down-regulated		C1orf195	down-regulated		PCDHAC1	down-regulated		MMP12	mRNAup
LINC01411	down-regulated		SH3GL2	down-regulated		LINC01625	down-regulated		CDCA5	mRNAup
AL033381.2	down-regulated		MRGPRE	down-regulated		FTH1P21	down-regulated		FGFBP1	mRNAup
AL355102.4	down-regulated		RPS3AP40	down-regulated		HAVCR1	down-regulated		TIMM8A	mRNAup
AL033381.1	down-regulated		CDH6	down-regulated		C5orf49	down-regulated		CCT7	mRNAup
TRAV30	down-regulated		AC015883.1	down-regulated		SLC4A4	down-regulated		LRFN4	mRNAup
HMGCS2	down-regulated		AC087477.2	down-regulated		LINC00551	down-regulated		GGH	mRNAup
RCC2P6	down-regulated		SULT1C4	down-regulated		GPA33	down-regulated		COL5A3	mRNAup
AC009542.2	down-regulated		NLRP9	down-regulated		PTPRT	down-regulated		HAS3	mRNAup
AC008758.2	down-regulated		GLDCP1	down-regulated		AC015845.2	down-regulated		KPNA4	mRNAup
FTH1P19	down-regulated		AL136366.1	down-regulated		CCDC33	down-regulated		MTFR2	mRNAup
MTCO1P53	down-regulated		KRT222	down-regulated		DNASE2B	down-regulated		IGF2BP2	mRNAup
SLC13A2	down-regulated		DSCAML1	down-regulated		AC104472.1	down-regulated		ZNF365	mRNAup
ENPP7P7	down-regulated		SPNS3	down-regulated		MORN5	down-regulated		CMSS1	mRNAup
TAF7L	down-regulated		SOX9-AS1	down-regulated		SLC14A2-AS1	down-regulated		HDAC4	mRNAup
C10orf62	down-regulated		SCARNA7	down-regulated		SCGB1A1	down-regulated		USP46	mRNAup
AC097376.1	down-regulated		CYP4F8	down-regulated		AL162414.1	down-regulated		GPRC5D	mRNAup
AC012467.1	down-regulated		MTND5P10	down-regulated		CTSE	down-regulated		ZNF706	mRNAup
MIR6784	down-regulated		AC008764.10	down-regulated		RNF148	down-regulated		B4GALNT3	mRNAup
KLKB1	down-regulated		SHLD2P1	down-regulated		LINC00968	down-regulated		PGAP1	mRNAup
ITPK1-AS1	down-regulated		AC015871.4	down-regulated		VSTM1	down-regulated		FSCN1	mRNAup
SLC5A9	down-regulated		TRHDE	down-regulated		UPP2	down-regulated		CBR3	mRNAup
HOXA10-AS	down-regulated		LINC01781	down-regulated		LINC00158	down-regulated		KRT6C	mRNAup
AC008937.2	down-regulated		AC011933.2	down-regulated		GJB1	down-regulated		STEAP1B	mRNAup
MIR10B	down-regulated		AC008870.6	down-regulated		PRSS57	down-regulated		MARK2	mRNAup
LINC00304	down-regulated		AQP7P1	down-regulated		C20orf85	down-regulated		AMMECR1L	mRNAup
AC007637.1	down-regulated		CABP1	down-regulated		AC013470.2	down-regulated		WDR53	mRNAup
AC118754.1	down-regulated		LINC02723	down-regulated		ROS1	down-regulated		STARD4	mRNAup
KIAA0087	down-regulated		XKR4	down-regulated		HNF4A	down-regulated		STAR	mRNAup
FAM156B	down-regulated		PDX1	down-regulated		ZSCAN4	down-regulated		TUBA1C	mRNAup
CYP3A5	down-regulated		CASC16	down-regulated		COL6A5	down-regulated		SART1	mRNAup
AC007849.1	down-regulated		KCNIP1	down-regulated		AC097059.1	down-regulated		GEMIN2	mRNAup
AC130352.1	down-regulated		AC010205.1	down-regulated		AL035530.1	down-regulated		TBX18	mRNAup
KBTBD11-OT1	down-regulated		AC008937.2	down-regulated		SLC46A2	down-regulated		FAM72A	mRNAup
MYH8	down-regulated		AC106872.6	down-regulated		CX3CR1	down-regulated		TRIM28	mRNAup
AP001528.2	down-regulated		LRRK2-DT	down-regulated		AC025822.2	down-regulated		POP1	mRNAup
AC016252.1	down-regulated		CDH22	down-regulated		ARHGEF38-IT1	down-regulated		REPS1	mRNAup
ZNF444P1	down-regulated		GOLGA8M	down-regulated		NAV2-AS2	down-regulated		RAC3	mRNAup
LHX1	down-regulated		TLK2P2	down-regulated		KCNQ3	down-regulated		TWIST2	mRNAup
AC093591.2	down-regulated		GJD3	down-regulated		NME5	down-regulated		CYB5R2	mRNAup
AC116345.1	down-regulated		TARDBPP2	down-regulated		AC037441.1	down-regulated		DDX1	mRNAup
AC005082.1	down-regulated		TRAV30	down-regulated		SPACA3	down-regulated		BFSP1	mRNAup
AC004080.2	down-regulated		AC083862.1	down-regulated		GSTA2	down-regulated		ERVMER34-1	mRNAup
AC015883.1	down-regulated		MTCO1P22	down-regulated		PRTN3	down-regulated		CPOX	mRNAup
B3GALT5	down-regulated		CATIP	down-regulated		HYDIN	down-regulated		LAMC2	mRNAup
AC012409.5	down-regulated		LINC00304	down-regulated		OIT3	down-regulated		CTNND1	mRNAup
AC016245.1	down-regulated		AC036108.2	down-regulated		TCTE1	down-regulated		C12orf56	mRNAup
SULT1C2P1	down-regulated		AC103563.7	down-regulated		AL137026.1	down-regulated		ADM	mRNAup
TLK2P2	down-regulated		IQUB	down-regulated		CST2	down-regulated		IMPDH1	mRNAup
GLIS1	down-regulated		RDH5	down-regulated		SLC22A31	down-regulated		NmRNAup205	mRNAup
GPA33	down-regulated		AC002401.2	down-regulated		AL138899.2	down-regulated		SP8	mRNAup
HOXB1	down-regulated		TRIM80P	down-regulated		PCDHA11	down-regulated		SBSN	mRNAup
C5orf67	down-regulated		AC093458.1	down-regulated		CYP4Z2P	down-regulated		SHOX2	mRNAup
EIF1AX-AS1	down-regulated		AC131888.1	down-regulated		CCL15	down-regulated		EPHA8	mRNAup
AC007114.2	down-regulated		CD300LG	down-regulated		CYP21A2	down-regulated		HAP1	mRNAup
AC011676.2	down-regulated		AC002401.3	down-regulated		SOCS5P2	down-regulated		PRR9	mRNAup
SLC34A1	down-regulated		SALL1	down-regulated		C1DP5	down-regulated		NOL10	mRNAup
RNA5SP154	down-regulated		ALDH1L1-AS2	down-regulated		OTOAP1	down-regulated		SLC16A1	mRNAup
TCAM1P	down-regulated		MTND5P12	down-regulated		SFTA2	down-regulated		TRMT5	mRNAup
SOX9-AS1	down-regulated		SOWAHA	down-regulated		SERPIND1	down-regulated		SOX2	mRNAup
AC064807.2	down-regulated		SLC30A2	down-regulated		PON1	down-regulated		AMER1	mRNAup
GSG1	down-regulated		AC024337.2	down-regulated		PLCXD3	down-regulated		CD3EAP	mRNAup
MTND4P24	down-regulated		MYOCD	down-regulated		AC015908.2	down-regulated		DUSP13	mRNAup
RUNDC3B	down-regulated		CYP51A1P3	down-regulated		PRG4	down-regulated		CKAP4	mRNAup
AP000688.2	down-regulated		AGXT	down-regulated		GABRB2	down-regulated		EFS	mRNAup
ID2-AS1	down-regulated		CRB2	down-regulated		Z99714.1	down-regulated		UCK2	mRNAup
AL353803.2	down-regulated		BCO1	down-regulated		SULT1C2	down-regulated		SMNDC1	mRNAup
NDUFB4P12	down-regulated		AC012467.1	down-regulated		ITIH2	down-regulated		KLK14	mRNAup
EDN3	down-regulated		AC002543.1	down-regulated		NCAM2	down-regulated		KRT82	mRNAup
BCO1	down-regulated		MTRNR2L2	down-regulated		AC104809.2	down-regulated		SLCO1B3	mRNAup
MYO3A	down-regulated		AP000229.1	down-regulated		ADAMTS8	down-regulated		DNAJB1	mRNAup
AC140725.1	down-regulated		EMX1	down-regulated		AC092868.2	down-regulated		METTL8	mRNAup
NDUFB4P11	down-regulated		LINC00840	down-regulated		ELANE	down-regulated		SMPD4	mRNAup
GIPC2	down-regulated		LINC01506	down-regulated		RGS7BP	down-regulated		FGF11	mRNAup
AC138305.3	down-regulated		THRB-IT1	down-regulated		RNF133	down-regulated		SOX21	mRNAup
SLC7A9	down-regulated		C10orf142	down-regulated		CPNE4	down-regulated		TCHH	mRNAup
TMEM139	down-regulated		AC007849.1	down-regulated		AC105021.1	down-regulated		TMEM45A	mRNAup
DMGDH	down-regulated		LGALS4	down-regulated		LINC01765	down-regulated		CARD18	mRNAup
AC016027.2	down-regulated		AC110998.1	down-regulated		PIFO	down-regulated		TEX19	mRNAup
AC127526.2	down-regulated		Z99127.1	down-regulated		POU1F1	down-regulated		SPRR2D	mRNAup
HOXB-AS4	down-regulated		DNAH7	down-regulated		OTOA	down-regulated		MRGBP	mRNAup
AC008026.3	down-regulated		AC007114.2	down-regulated		PPIAP39	down-regulated		MARK1	mRNAup
ILDR2	down-regulated		AC025263.1	down-regulated		TMEM232	down-regulated		PRPF19	mRNAup
MYOC	down-regulated		AC015884.3	down-regulated		SRD5A2	down-regulated		HSPB3	mRNAup
AC104964.3	down-regulated		REV3L-IT1	down-regulated		AC012640.5	down-regulated		PAK6	mRNAup
AC093458.2	down-regulated		AC118754.1	down-regulated		HBD	down-regulated		RBM4	mRNAup
LINC00501	down-regulated		GRIN2B	down-regulated		TBX5-AS1	down-regulated		PLA2G4E	mRNAup
AC092140.2	down-regulated		AL161669.1	down-regulated		RGS13	down-regulated		ARID3A	mRNAup
HEPACAM	down-regulated		SHISA3	down-regulated		AL645941.2	down-regulated		WDR43	mRNAup
HGFAC	down-regulated		AC009185.1	down-regulated		ZNF33BP1	down-regulated		TENM2	mRNAup
LINC01764	down-regulated		AC109309.1	down-regulated		DPP10-AS1	down-regulated		IRF6	mRNAup
SPNS3	down-regulated		AC097376.2	down-regulated		NRG3	down-regulated		SERPINB7	mRNAup
AC026369.1	down-regulated		KRT18P57	down-regulated		STK32A	down-regulated		DLL1	mRNAup
CDH6	down-regulated		GLOD5	down-regulated		MUC3A	down-regulated		GNB1L	mRNAup
AC139783.1	down-regulated		BCRP3	down-regulated		AL512328.1	down-regulated		CXCL8	mRNAup
AL035405.1	down-regulated		AL161804.1	down-regulated		AC015909.1	down-regulated		KCTD5	mRNAup
EXOC3L4	down-regulated		AC104964.3	down-regulated		NDNF	down-regulated		IL36B	mRNAup
CXXC5-AS1	down-regulated		AC008514.1	down-regulated		KHDRBS2	down-regulated		CCDC138	mRNAup
AL035420.2	down-regulated		AP001528.1	down-regulated		GAL3ST1	down-regulated		UBL4A	mRNAup
RNU6-125P	down-regulated		ASIC2	down-regulated		PRSS35	down-regulated		CKS1B	mRNAup
XIST	down-regulated		LINC00336	down-regulated		CCL14	down-regulated		NDUFA4L2	mRNAup
AC073569.1	down-regulated		PCDHB1	down-regulated		SIGLEC8	down-regulated		AP2M1	mRNAup
AC092681.1	down-regulated		PTH1R	down-regulated		ARX	down-regulated		CDK6	mRNAup
GOLGA8M	down-regulated		AC118755.1	down-regulated		NAT2	down-regulated		P2RY1	mRNAup
AC024940.4	down-regulated		AC007496.2	down-regulated		CLUL1	down-regulated		TUFT1	mRNAup
SST	down-regulated		AC004080.4	down-regulated		DCLRE1CP1	down-regulated		RPL7	mRNAup
LAMA5-AS1	down-regulated		KLHL14	down-regulated		EPPIN	down-regulated		TMTC3	mRNAup
AC095031.1	down-regulated		HABP2	down-regulated		AL353597.3	down-regulated		ADH7	mRNAup
AC005162.2	down-regulated		TMEM139	down-regulated		EEF1A1P15	down-regulated		CLDND1	mRNAup
TMEM272	down-regulated		AC002064.2	down-regulated		TMPRSS6	down-regulated		CSF3	mRNAup
MTCO3P22	down-regulated		MTCO1P2	down-regulated		AC022164.1	down-regulated		GPATCH4	mRNAup
MTND5P12	down-regulated		NME5	down-regulated		EEF1A1P34	down-regulated		DOLPP1	mRNAup
SLC30A2	down-regulated		SMTNL2	down-regulated		APOC4-APOC2	down-regulated		B4GALT2	mRNAup
NLRP9	down-regulated		SMIM6	down-regulated		AC024901.1	down-regulated		SLC44A1	mRNAup
GPD1	down-regulated		BRS3	down-regulated		BTNL8	down-regulated		FAM168B	mRNAup
MTATP6P2	down-regulated		LRRC66	down-regulated		NKX2-1-AS1	down-regulated		LHX8	mRNAup
S100A11P2	down-regulated		AC007601.1	down-regulated		AL359313.1	down-regulated		QRFP	mRNAup
HAND2-AS1	down-regulated		RUNDC3B	down-regulated		AC002064.2	down-regulated		CRYBG3	mRNAup
AC002064.3	down-regulated		AC023906.1	down-regulated		AC079210.1	down-regulated		CLCA2	mRNAup
AC007496.2	down-regulated		SLC23A1	down-regulated		MALRD1	down-regulated		STRAP	mRNAup
KLHDC7A	down-regulated		AC015908.2	down-regulated		RASGRF1	down-regulated		KLC3	mRNAup
AL021368.1	down-regulated		MTCYBP35	down-regulated		AC007638.2	down-regulated		IL1RAP	mRNAup
PRAP1	down-regulated		AC114801.3	down-regulated		AC124067.4	down-regulated		PRKAG3	mRNAup
HOXA-AS3	down-regulated		AC103702.1	down-regulated		AC007598.3	down-regulated		RALGDS	mRNAup
DPY19L2P2	down-regulated		CRIP3	down-regulated		NCAPGP1	down-regulated		ARHGAP19	mRNAup
MASP1	down-regulated		SYPL2	down-regulated		DRC7	down-regulated		SLC17A7	mRNAup
ZNF37CP	down-regulated		AQP7	down-regulated		NKX2-1	down-regulated		TFRC	mRNAup
ENPP7P11	down-regulated		AC002558.1	down-regulated		PZP	down-regulated		TYRO3	mRNAup
AC084782.3	down-regulated		NAT2	down-regulated		BMP5	down-regulated		CSNK1A1	mRNAup
OVOL1-AS1	down-regulated		RBM17P4	down-regulated		ZBTB16	down-regulated		PSMC1	mRNAup
CCDC160	down-regulated		POTEG	down-regulated		PLA2G10	down-regulated		SLC7A8	mRNAup
AC004870.2	down-regulated		AC007598.3	down-regulated		PTCHD1	down-regulated		ADA	mRNAup
AF233439.1	down-regulated		ABCG5	down-regulated		SFTA1P	down-regulated		PDCD10	mRNAup
AC092720.1	down-regulated		SPATA4	down-regulated		PARAL1	down-regulated		PSME4	mRNAup
SLC23A1	down-regulated		TYRO3P	down-regulated		RPSAP63	down-regulated		TFG	mRNAup
ONECUT2	down-regulated		AC129507.3	down-regulated		LINGO4	down-regulated		ELOVL4	mRNAup
AKR7L	down-regulated		AC011921.3	down-regulated		CFTR	down-regulated		CCL24	mRNAup
AC099791.2	down-regulated		RPL15P21	down-regulated		GFI1B	down-regulated		FAM131A	mRNAup
FOXD4	down-regulated		HMGCS2	down-regulated		TRPC2	down-regulated		FOXK1	mRNAup
KCP	down-regulated		VXN	down-regulated		CYP4A11	down-regulated		LIMK2	mRNAup
MTRNR2L10	down-regulated		DOCK8-AS1	down-regulated		PGM5P4-AS1	down-regulated		ETF1	mRNAup
AC008543.3	down-regulated		CFAP221	down-regulated		CNGA4	down-regulated		JAG2	mRNAup
TTR	down-regulated		AL445183.2	down-regulated		MS4A15	down-regulated		SLC25A25	mRNAup
AF213884.3	down-regulated		AC007496.3	down-regulated		LINC00543	down-regulated		PLA2G3	mRNAup
AL049629.1	down-regulated		AL845321.1	down-regulated		LINC01185	down-regulated		NIP7	mRNAup
SERPINA4	down-regulated		AL355312.3	down-regulated		RSPH10B2	down-regulated		TMEM158	mRNAup
UPB1	down-regulated		CYP4F24P	down-regulated		ZBBX	down-regulated		TAF1A	mRNAup
DAND5	down-regulated		TMEFF2	down-regulated		SHISA9	down-regulated		DPP3	mRNAup
CTAGE3P	down-regulated		FAHD2P1	down-regulated		ARHGEF38	down-regulated		DENND2C	mRNAup
HOXB9	down-regulated		C5orf67	down-regulated		FUT9	down-regulated		TPM4	mRNAup
AGXT	down-regulated		ACSM1	down-regulated		IGSF5	down-regulated		LOXL2	mRNAup
TCP11	down-regulated		TM4SF4	down-regulated		ELN-AS1	down-regulated		DENR	mRNAup
RIPPLY1	down-regulated		IGSF5	down-regulated		FCER2	down-regulated		SENP2	mRNAup
AC011379.1	down-regulated		AC133963.1	down-regulated		AC090044.1	down-regulated		RNF26	mRNAup
KIF12	down-regulated		FHAD1-AS1	down-regulated		LRRK2	down-regulated		CYTL1	mRNAup
AC008667.1	down-regulated		CLEC18A	down-regulated		LINC00840	down-regulated		KHDC1L	mRNAup
HOXD-AS2	down-regulated		PTCHD4	down-regulated		L3MBTL4-AS1	down-regulated		DLK2	mRNAup
AL845321.1	down-regulated		AC093063.1	down-regulated		PPP1R14D	down-regulated		ABI1	mRNAup
AC008764.10	down-regulated		TPK1	down-regulated		NPIPB9	down-regulated		ALDH3A1	mRNAup
TMEM51-AS1	down-regulated		AC092681.1	down-regulated		NMD3P1	down-regulated		FIP1L1	mRNAup
LRRC66	down-regulated		MTRNR2L6	down-regulated		FYB2	down-regulated		ANKRD62	mRNAup
AC109309.1	down-regulated		PAX8	down-regulated		RGN	down-regulated		COL2A1	mRNAup
HOXC-AS2	down-regulated		MTND4P35	down-regulated		AC012409.3	down-regulated		DDN	mRNAup
AC078962.2	down-regulated		ACADL	down-regulated		NAT8B	down-regulated		HK2	mRNAup
AC009061.1	down-regulated		AC005410.1	down-regulated		CABCOCO1	down-regulated		DNAJC2	mRNAup
BMS1P8	down-regulated		AL096711.2	down-regulated		LINC00689	down-regulated		GJB2	mRNAup
HOXA13	down-regulated		FTH1P19	down-regulated		ZNF826P	down-regulated		ERO1A	mRNAup
AL161669.3	down-regulated		AC095031.1	down-regulated		ANKS1B	down-regulated		CHIC2	mRNAup
SCGB2A1	down-regulated		CAPN6	down-regulated		TM4SF4	down-regulated		DLX5	mRNAup
DPY19L2P4	down-regulated		AC008026.3	down-regulated		AC136469.1	down-regulated		ADK	mRNAup
TRPV6	down-regulated		CLTRN	down-regulated		HAMP	down-regulated		FTSJ1	mRNAup
RXFP4	down-regulated		ADRA1A	down-regulated		AC007953.1	down-regulated		DST	mRNAup
CHDH	down-regulated		SLC4A4	down-regulated		OR7E47P	down-regulated		NPSR1	mRNAup
CYS1	down-regulated		AC007272.1	down-regulated		ACSM3	down-regulated		STK35	mRNAup
ALDH1L1	down-regulated		C9orf50	down-regulated		AC091849.2	down-regulated		CYP26B1	mRNAup
AC131888.1	down-regulated		KIF12	down-regulated		AC243967.2	down-regulated		RPTN	mRNAup
SULT1C2	down-regulated		AC130456.1	down-regulated		DAW1	down-regulated		FYTTD1	mRNAup
RPSAP8	down-regulated		CLIC4P3	down-regulated		KCNIP1	down-regulated		CCDC88C	mRNAup
DUSP15	down-regulated		AC093458.2	down-regulated		ZNF385B	down-regulated		SLC13A5	mRNAup
CYP2C9	down-regulated		MTND3P25	down-regulated		LINC01857	down-regulated		C8orf76	mRNAup
AL109659.3	down-regulated		CYP3A5	down-regulated		AC245052.3	down-regulated		BCCIP	mRNAup
CRX	down-regulated		MAATS1	down-regulated		BCRP2	down-regulated		HNRNPA3	mRNAup
ACSM6	down-regulated		GDF3	down-regulated		MEP1A	down-regulated		mRNAupP1	mRNAup
ACSM1	down-regulated		CXXC5-AS1	down-regulated		SYT6	down-regulated		SNRPD3	mRNAup
CRIP3	down-regulated		AL138899.1	down-regulated		SLC26A8	down-regulated		RAD21	mRNAup
AL121895.2	down-regulated		MUCL3	down-regulated		PRR29-AS1	down-regulated		AC011462.1	mRNAup
KRT18P57	down-regulated		ARHGEF2-AS1	down-regulated		TYRP1	down-regulated		TTPAL	mRNAup
SPDYE16	down-regulated		LINC02555	down-regulated		SCRG1	down-regulated		ELL2	mRNAup
AC097381.1	down-regulated		AC004057.1	down-regulated		DLG2	down-regulated		GPR87	mRNAup
AL354751.1	down-regulated		AC007790.1	down-regulated		EFHB	down-regulated		ZNF770	mRNAup
AC022306.3	down-regulated		AC123912.4	down-regulated		DDX11L10	down-regulated		B3GALNT2	mRNAup
AC090515.5	down-regulated		SHISA9	down-regulated		LINC01266	down-regulated		KLK11	mRNAup
AL136980.1	down-regulated		ELOBP1	down-regulated		C11orf88	down-regulated		CHAC2	mRNAup
AC015910.1	down-regulated		PRUNE2	down-regulated		XAGE2	down-regulated		HMGA1	mRNAup
NPY1R	down-regulated		ENPP7P7	down-regulated		TMEM100	down-regulated		PARD3	mRNAup
AL021328.1	down-regulated		MIR3189	down-regulated		AC023509.2	down-regulated		KDM3A	mRNAup
FTOP1	down-regulated		LINC00628	down-regulated		AC104966.1	down-regulated		NRG1	mRNAup
AC020656.2	down-regulated		CHDH	down-regulated		MRO	down-regulated		TGFBI	mRNAup
ENPP7P12	down-regulated		AC004797.1	down-regulated		GPAT2P1	down-regulated		DUSP9	mRNAup
AC002401.3	down-regulated		SEL1L2	down-regulated		FCRL1	down-regulated		RUBCN	mRNAup
GPR45	down-regulated		DUSP15	down-regulated		FAM163B	down-regulated		VDAC2	mRNAup
C9orf50	down-regulated		AC023389.2	down-regulated		STAC2	down-regulated		SPRR1B	mRNAup
CPO	down-regulated		KCNH6	down-regulated		INMT	down-regulated		RPS17	mRNAup
HOXD3	down-regulated		GFRA1	down-regulated		LINC01150	down-regulated		CD44	mRNAup
MEIS1-AS2	down-regulated		AC110609.1	down-regulated		GGT2	down-regulated		TUBD1	mRNAup
AJAP1	down-regulated		AC069549.1	down-regulated		LINC01659	down-regulated		ITGA5	mRNAup
SCARNA7	down-regulated		AC026992.1	down-regulated		AC007389.1	down-regulated		MEFV	mRNAup
MEGF11	down-regulated		MTND4LP30	down-regulated		AC024337.2	down-regulated		OTOP2	mRNAup
SLC25A47	down-regulated		CYP3A7	down-regulated		FAM221B	down-regulated		CNGB1	mRNAup
ELOBP1	down-regulated		AL021328.1	down-regulated		DNAH6	down-regulated		TOP1MT	mRNAup
GATA3-AS1	down-regulated		AL158801.1	down-regulated		AP004608.1	down-regulated		HS3ST3A1	mRNAup
RNF2P1	down-regulated		GLYATL1P1	down-regulated		AL353743.3	down-regulated		CAPNS2	mRNAup
AC010200.1	down-regulated		ANGPTL7	down-regulated		GLYATL1P1	down-regulated		LYAR	mRNAup
ATP6V1FNB	down-regulated		MTRNR2L9	down-regulated		DPP10	down-regulated		IGSF3	mRNAup
AC002551.1	down-regulated		GCNT1P1	down-regulated		CR2	down-regulated		TP53AIP1	mRNAup
LINC00336	down-regulated		ACSM6	down-regulated		CALCR	down-regulated		TIGAR	mRNAup
AL121871.1	down-regulated		AC084782.2	down-regulated		AL357093.2	down-regulated		RELT	mRNAup
CYP4F23P	down-regulated		AC084759.3	down-regulated		AC008267.1	down-regulated		FOXK2	mRNAup
AC012485.2	down-regulated		LINC02774	down-regulated		SLC5A2	down-regulated		STARD5	mRNAup
AC090159.1	down-regulated		POU5F2	down-regulated		DNAI1	down-regulated		DNAH17	mRNAup
AC009185.1	down-regulated		AL450326.2	down-regulated		SLC6A20	down-regulated		EXOC3	mRNAup
AC138649.2	down-regulated		ARHGAP6	down-regulated		DNAJC5B	down-regulated		RAD23B	mRNAup
FOXD4L3	down-regulated		EFCAB12	down-regulated		RIIAD1	down-regulated		KLK8	mRNAup
GOLGA8UP	down-regulated		LINC02435	down-regulated		AL121985.3	down-regulated		USP14	mRNAup
DNAJC9-AS1	down-regulated		MTATP6P2	down-regulated		GGTLC4P	down-regulated		NRARP	mRNAup
MAATS1	down-regulated		AP001636.1	down-regulated		CLIC5	down-regulated		C17orf99	mRNAup
CIDEC	down-regulated		CCDC160	down-regulated		LINC01841	down-regulated		PREP	mRNAup
TDGF1P6	down-regulated		OTOA	down-regulated		C4BPB	down-regulated		WDFY2	mRNAup
AP000424.1	down-regulated		TRPV5	down-regulated		C1orf189	down-regulated		PSMD11	mRNAup
CYP4F12	down-regulated		FAM47E-STBD1	down-regulated		SLCO4C1	down-regulated		EN1	mRNAup
LINC01342	down-regulated		AC097504.2	down-regulated		SLC5A8	down-regulated		ZBTB11	mRNAup
AC002543.1	down-regulated		ZSCAN4	down-regulated		VEGFD	down-regulated		USP32	mRNAup
DNAJC22	down-regulated		AC089984.2	down-regulated		AARD	down-regulated		MED27	mRNAup
FAM90A2P	down-regulated		ENPP7P2	down-regulated		C9orf152	down-regulated		KRT71	mRNAup
GJB1	down-regulated		AC129507.2	down-regulated		BTN1A1	down-regulated		KCNQ5	mRNAup
NKAIN4	down-regulated		AC097625.1	down-regulated		LINC00261	down-regulated		EPGN	mRNAup
EHMT2-AS1	down-regulated		AC012485.2	down-regulated		AC011447.6	down-regulated		NOP58	mRNAup
GDF7	down-regulated		AL138899.2	down-regulated		AL596087.2	down-regulated		CEP85	mRNAup
SLC45A2	down-regulated		WSCD1	down-regulated		CYP2B6	down-regulated		PTPN2	mRNAup
DIO1	down-regulated		CST5	down-regulated		UBXN10-AS1	down-regulated		CIP2A	mRNAup
HMGB1P49	down-regulated		KIAA0087	down-regulated		AC004594.1	down-regulated		NFE2L2	mRNAup
AP000763.2	down-regulated		RHEX	down-regulated		CTBP2P7	down-regulated		SH3PXD2A	mRNAup
AP000697.1	down-regulated		CU638689.4	down-regulated		BCL2L15	down-regulated		SPINK5	mRNAup
SLC25A30-AS1	down-regulated		AP000569.1	down-regulated		ABCC6	down-regulated		ENTR1	mRNAup
RPL12P21	down-regulated		AP001094.1	down-regulated		CYP21A1P	down-regulated		TRAF7	mRNAup
AL606489.1	down-regulated		AP000688.2	down-regulated		TMEM163	down-regulated		CCT4	mRNAup
FUT6	down-regulated		LINC01146	down-regulated		SIRPD	down-regulated		GPR158	mRNAup
AC139491.2	down-regulated		AL078644.1	down-regulated		GRM5	down-regulated		ADCY3	mRNAup
MROH7	down-regulated		SLC25A30-AS1	down-regulated		ANKDD1B	down-regulated		IGSF9	mRNAup
M1AP	down-regulated		MGAM	down-regulated		KERA	down-regulated		RGS20	mRNAup
AL355355.1	down-regulated		LRRC37A11P	down-regulated		DPEP1	down-regulated		SIX2	mRNAup
ESR1	down-regulated		AC087477.6	down-regulated		AC012511.1	down-regulated		SERPINB13	mRNAup
AC023043.2	down-regulated		CYS1	down-regulated		AC083900.1	down-regulated		SET	mRNAup
SMC1B	down-regulated		LINC02060	down-regulated		KCTD16	down-regulated		EIF2S1	mRNAup
AL354950.1	down-regulated		AL162171.2	down-regulated		PDE1A	down-regulated		SHISAL1	mRNAup
PRUNE2	down-regulated		AP005131.3	down-regulated		AC011944.1	down-regulated		TNNT2	mRNAup
TRIM31	down-regulated		ONECUT2	down-regulated		LINC00501	down-regulated		HCAR2	mRNAup
AC084757.4	down-regulated		AL109659.3	down-regulated		SLC4A5	down-regulated		VAX1	mRNAup
LINC00659	down-regulated		ID2-AS1	down-regulated		LINC01655	down-regulated		APOBEC3A	mRNAup
RGPD1	down-regulated		MIR30C2	down-regulated		LINC02198	down-regulated		STRN3	mRNAup
SYCP3	down-regulated		LINC01659	down-regulated		AP000812.1	down-regulated		AREG	mRNAup
SOX30	down-regulated		AC010261.2	down-regulated		CCT8P1	down-regulated		CEP72	mRNAup
WNK4	down-regulated		NXNL2	down-regulated		SCARNA7	down-regulated		MYC	mRNAup
AL121992.3	down-regulated		HNF4G	down-regulated		AC116407.1	down-regulated		NRXN1	mRNAup
LINC01555	down-regulated		AL353653.1	down-regulated		GYPE	down-regulated		C22orf23	mRNAup
ABCA17P	down-regulated		AL035405.1	down-regulated		LRRC71	down-regulated		NELL2	mRNAup
AC016735.1	down-regulated		KRT18P52	down-regulated		AC013553.3	down-regulated		VCP	mRNAup
REN	down-regulated		LINC02848	down-regulated		GPD1	down-regulated		PCSK9	mRNAup
CFAP99	down-regulated		AC002451.1	down-regulated		LINC02495	down-regulated		RALB	mRNAup
S100A1	down-regulated		ITPK1-AS1	down-regulated		AC098935.2	down-regulated		TNFAIP3	mRNAup
AC098827.1	down-regulated		FAM156B	down-regulated		OR52N4	down-regulated		ADAMTS17	mRNAup
AC026333.4	down-regulated		AL121895.2	down-regulated		RPL19P20	down-regulated		MMP1	mRNAup
AL121972.1	down-regulated		B3GALT5	down-regulated		CHST13	down-regulated		PPP4R1	mRNAup
DPY19L2	down-regulated		TMEM272	down-regulated		ASPA	down-regulated		GCLC	mRNAup
AC015908.3	down-regulated		H3P23	down-regulated		AC008691.1	down-regulated		SNW1	mRNAup
AC025176.1	down-regulated		AC019117.3	down-regulated		AL445423.1	down-regulated		PRRX2	mRNAup
TPK1	down-regulated		DCDC1	down-regulated		BRINP3	down-regulated		CD109	mRNAup
RN7SKP78	down-regulated		CRYM	down-regulated		PRSS2	down-regulated		PES1	mRNAup
IFNE	down-regulated		KRT18P38	down-regulated		ZDHHC15	down-regulated		AMTN	mRNAup
LINC02313	down-regulated		AC002551.1	down-regulated		COL6A6	down-regulated		QSOX2	mRNAup
TMEM178B	down-regulated		PPARGC1A	down-regulated		TRAV24	down-regulated		YBX1	mRNAup
IL17RB	down-regulated		TRMT9B	down-regulated		RN7SL8P	down-regulated		FOXP2	mRNAup
PSORS1C3	down-regulated		CYP4F60P	down-regulated		ALOX15	down-regulated		SIAH2	mRNAup
HMCN2	down-regulated		AL035420.2	down-regulated		TMEM213	down-regulated		GSC	mRNAup
AC103702.2	down-regulated		AC097376.1	down-regulated		CRB1	down-regulated		ZNF114	mRNAup
BBOX1	down-regulated		RNF2P1	down-regulated		AC010136.1	down-regulated		TEX46	mRNAup
AC073342.1	down-regulated		CCDC148	down-regulated		AC113361.1	down-regulated		FAM83B	mRNAup
MIR196A1	down-regulated		ZFP2	down-regulated		KRT18P20	down-regulated		IRX4	mRNAup
BX322650.1	down-regulated		AC016924.1	down-regulated		CCL23	down-regulated		TLE3	mRNAup
AC007993.1	down-regulated		AL353692.2	down-regulated		LRRN4	down-regulated		IZUMO1	mRNAup
NRG2	down-regulated		NLRP6	down-regulated		RANBP20P	down-regulated		ZC3H8	mRNAup
AC002401.2	down-regulated		HCN4	down-regulated		ACOX2	down-regulated		SLC10A6	mRNAup
LTC4S	down-regulated		MRPS9-AS2	down-regulated		AL049634.1	down-regulated		EEF1D	mRNAup
AC109361.1	down-regulated		ACY3	down-regulated		CNR2	down-regulated		ITPRID2	mRNAup
AC009088.4	down-regulated		AC010336.5	down-regulated		GALNT17	down-regulated		BCR	mRNAup
AC091132.3	down-regulated		PRELID1P3	down-regulated		UNC93B3	down-regulated		MELTF	mRNAup
C11orf42	down-regulated		LINC01671	down-regulated		SLC16A4	down-regulated		UGT1A7	mRNAup
CYP3A7	down-regulated		AC016027.2	down-regulated		GATA5	down-regulated		SERPINA11	mRNAup
LINC00479	down-regulated		LACTB2-AS1	down-regulated		LINC02015	down-regulated		UFD1	mRNAup
AC022762.2	down-regulated		MRPL37P1	down-regulated		BNIP3P16	down-regulated		CNTN1	mRNAup
LINC00628	down-regulated		RPS3AP54	down-regulated		SLC7A10	down-regulated		HS6ST1	mRNAup
GLDC	down-regulated		MUC13	down-regulated		ADAM29	down-regulated		UBE2O	mRNAup
AC010680.5	down-regulated		AL133370.1	down-regulated		AC139453.2	down-regulated		DDIAS	mRNAup
AL138759.1	down-regulated		ACSM3	down-regulated		FOLR1	down-regulated		CMAS	mRNAup
MTCO1P11	down-regulated		RPS3AP29	down-regulated		PRTG	down-regulated		PLAC1	mRNAup
HNRNPA1P7	down-regulated		GPR31	down-regulated		LRRC2-AS1	down-regulated		C16orf72	mRNAup
KRTAP1-5	down-regulated		CLEC9A	down-regulated		CACNA2D2	down-regulated		CHEK2	mRNAup
HGD	down-regulated		AC090044.1	down-regulated		DNMBP-AS1	down-regulated		NEURL1	mRNAup
TMPRSS3	down-regulated		AC091806.1	down-regulated		ECT2L	down-regulated		TGS1	mRNAup
AC020922.4	down-regulated		AC113361.1	down-regulated		AC091806.1	down-regulated		PWP1	mRNAup
AL358216.1	down-regulated		ENPP7P12	down-regulated		AL122018.1	down-regulated		METAP2	mRNAup
AC010809.3	down-regulated		NKAIN3	down-regulated		MBL1P	down-regulated		ZBED4	mRNAup
LYG1	down-regulated		AC099789.1	down-regulated		FGG	down-regulated		INTS13	mRNAup
AL391421.1	down-regulated		NR2F2-AS1	down-regulated		BCRP3	down-regulated		LRP12	mRNAup
AC012531.1	down-regulated		FAM47E	down-regulated		LINC01508	down-regulated		OGFOD1	mRNAup
AL354751.3	down-regulated		GFI1B	down-regulated		Z98257.1	down-regulated		ESRP1	mRNAup
MIR135A1	down-regulated		MUC2	down-regulated		TBX5	down-regulated		CKAP2L	mRNAup
MTND4LP30	down-regulated		AC016405.1	down-regulated		SFTPD-AS1	down-regulated		MAFG	mRNAup
HMMR-AS1	down-regulated		AP004608.1	down-regulated		AC090337.1	down-regulated		KBTBD2	mRNAup
AC069528.2	down-regulated		MTRNR2L3	down-regulated		AC069549.1	down-regulated		SOHLH1	mRNAup
SMG1P4	down-regulated		AP000424.1	down-regulated		PGBD4P3	down-regulated		MTERF3	mRNAup
AL021920.2	down-regulated		MTRNR2L10	down-regulated		LINC00494	down-regulated		MAGEA12	mRNAup
AL135786.2	down-regulated		ARSL	down-regulated		RPSAP1	down-regulated		CSTB	mRNAup
AGAP11	down-regulated		FRMD3	down-regulated		LINC01671	down-regulated		PPM1G	mRNAup
NACAP8	down-regulated		MFAP1P1	down-regulated		AL355076.2	down-regulated		RNMT	mRNAup
PLEKHH1	down-regulated		AC016735.1	down-regulated		AC027288.1	down-regulated		MRPL51	mRNAup
SEC16B	down-regulated		AC107993.1	down-regulated		ROR1-AS1	down-regulated		HMGCS1	mRNAup
DNAH7	down-regulated		ZNF37CP	down-regulated		ERICH3	down-regulated		RAB10	mRNAup
AL136982.1	down-regulated		SNRPFP1	down-regulated		CRYBB1	down-regulated		WRNIP1	mRNAup
AC120498.9	down-regulated		KRT20	down-regulated		CCDC170	down-regulated		LMO1	mRNAup
KBTBD12	down-regulated		CPO	down-regulated		LINC01141	down-regulated		S100A12	mRNAup
HOXA11-AS	down-regulated		GATA6-AS1	down-regulated		SYNPR-AS1	down-regulated		NRBF2	mRNAup
SYCP2	down-regulated		AC020908.3	down-regulated		AC099792.1	down-regulated		ARHGEF19	mRNAup
AC110774.1	down-regulated		AC079781.3	down-regulated		PHF5CP	down-regulated		TTC4	mRNAup
ACY3	down-regulated		AL138688.2	down-regulated		CATIP	down-regulated		TBC1D23	mRNAup
TCERG1L-AS1	down-regulated		VEPH1	down-regulated		GLRA3	down-regulated		NDEL1	mRNAup
AC110998.1	down-regulated		GDF7	down-regulated		AL445426.1	down-regulated		BAIAP2	mRNAup
AC093732.1	down-regulated		ATP5F1CP1	down-regulated		KLHDC7A	down-regulated		COL12A1	mRNAup
GOLGA8O	down-regulated		B3GAT1	down-regulated		AL135999.3	down-regulated		FOLR3	mRNAup
HOXB-AS3	down-regulated		MTCO3P22	down-regulated		TPT1P1	down-regulated		MAP3K9	mRNAup
ZBTB20	down-regulated		AC136469.1	down-regulated		LINC00892	down-regulated		ACKR3	mRNAup
AC133041.1	down-regulated		AL606489.1	down-regulated		LGSN	down-regulated		CPSF2	mRNAup
AC104126.1	down-regulated		AC092140.2	down-regulated		RLN2	down-regulated		B3GNT5	mRNAup
AL133370.1	down-regulated		AL590004.3	down-regulated		LINC02519	down-regulated		HECA	mRNAup
GOLGA8IP	down-regulated		CASC1	down-regulated		LINC01352	down-regulated		RAE1	mRNAup
AC011239.2	down-regulated		TTBK1	down-regulated		FOXA2	down-regulated		CCNA1	mRNAup
GDF3	down-regulated		AC002064.3	down-regulated		TMEM72-AS1	down-regulated		MNAT1	mRNAup
SMIM2	down-regulated		AC127526.2	down-regulated		AC140479.2	down-regulated		RECQL	mRNAup
AC011365.2	down-regulated		AC012640.5	down-regulated		LINC02422	down-regulated		PTPRZ1	mRNAup
LGALS4	down-regulated		AL590093.1	down-regulated		AP000229.1	down-regulated		RPP40	mRNAup
AP001528.1	down-regulated		BPI	down-regulated		TMEM108	down-regulated		SLC18A3	mRNAup
LINC01506	down-regulated		FTOP1	down-regulated		C22orf15	down-regulated		RPL7L1	mRNAup
SPA17P1	down-regulated		HOXC-AS3	down-regulated		LEFTY2	down-regulated		LRRC38	mRNAup
AC093809.1	down-regulated		FP325332.1	down-regulated		CASS4	down-regulated		SLC25A5	mRNAup
CTAGE4	down-regulated		LIPC-AS1	down-regulated		AC135012.3	down-regulated		RIOX2	mRNAup
CPNE6	down-regulated		NRG2	down-regulated		MMP24	down-regulated		NEIL3	mRNAup
FAM81A	down-regulated		AL031651.1	down-regulated		SFTPD	down-regulated		SKP2	mRNAup
AR	down-regulated		BNC2-AS1	down-regulated		CNR1	down-regulated		PTHLH	mRNAup
AC007272.1	down-regulated		SPEF1	down-regulated		AP000344.1	down-regulated		CCT2	mRNAup
ACTG1P10	down-regulated		DDO	down-regulated		CTNND2	down-regulated		TMPRSS11E	mRNAup
AC127537.1	down-regulated		CCDC13	down-regulated		SMIM6	down-regulated		PAX9	mRNAup
RPL34P27	down-regulated		AL354751.1	down-regulated		MIR3189	down-regulated		TRAF3	mRNAup
AC110609.1	down-regulated		LINC02038	down-regulated		TBX4	down-regulated		MPPED1	mRNAup
FOXD4L4	down-regulated		AC133041.1	down-regulated		YWHAEP7	down-regulated		KNSTRN	mRNAup
AC016738.1	down-regulated		AC011511.3	down-regulated		PCDHB1	down-regulated		WDR75	mRNAup
AC010261.2	down-regulated		AC093809.1	down-regulated		FAM47E-STBD1	down-regulated		BCL2L2	mRNAup
AC131238.1	down-regulated		AC130352.1	down-regulated		ST3GAL5-AS1	down-regulated		AEBP2	mRNAup
AC018695.7	down-regulated		AC091151.1	down-regulated		AL355075.4	down-regulated		TP73	mRNAup
ESRRG	down-regulated		AC138649.2	down-regulated		UBXN10	down-regulated		DSC2	mRNAup
GABRP	down-regulated		DPY19L2P4	down-regulated		LINC01649	down-regulated		MYO10	mRNAup
PSME2P6	down-regulated		OR10V2P	down-regulated		PAK3	down-regulated		TMEM74	mRNAup
PPIAP41	down-regulated		SKINT1L	down-regulated		AVPR1B	down-regulated		DBF4	mRNAup
RNF157	down-regulated		AC139783.1	down-regulated		AC092484.1	down-regulated		NRBP1	mRNAup
PROM1	down-regulated		CNTN4	down-regulated		PLD4	down-regulated		PRR14L	mRNAup
AC026367.2	down-regulated		CACNA1D	down-regulated		PTBP1P	down-regulated		PITX2	mRNAup
AC015813.7	down-regulated		RAB19	down-regulated		AC092145.1	down-regulated		VANGL2	mRNAup
AP000229.1	down-regulated		AC008629.1	down-regulated		TTC16	down-regulated		FRMD6	mRNAup
HNF1B	down-regulated		AC138866.1	down-regulated		PLA2G5	down-regulated		SH3GL3	mRNAup
LSMEM2	down-regulated		AKR7L	down-regulated		LINC00881	down-regulated		AC069368.1	mRNAup
RPS20P2	down-regulated		AC105935.2	down-regulated		AL133284.1	down-regulated		NTF4	mRNAup
AC135586.2	down-regulated		AC244034.3	down-regulated		NUP210L	down-regulated		NAA50	mRNAup
FABP5P3	down-regulated		AC011379.1	down-regulated		RASGRF2-AS1	down-regulated		ABCE1	mRNAup
RPS3AP40	down-regulated		AL121768.1	down-regulated		KCNJ16	down-regulated		RUVBL1	mRNAup
AC027348.1	down-regulated		ZBTB20	down-regulated		SMCO3	down-regulated		GPR176	mRNAup
AL031663.3	down-regulated		LRRC36	down-regulated		TMEM236	down-regulated		GOLGA6L2	mRNAup
AC010680.1	down-regulated		LINC02086	down-regulated		SLC26A7	down-regulated		GSDMC	mRNAup
AC104561.3	down-regulated		AP000344.2	down-regulated		NANOGP1	down-regulated		ACVR1C	mRNAup
MTRNR2L8	down-regulated		TDGF1P6	down-regulated		ANKRD44-IT1	down-regulated		RRS1	mRNAup
RPL15P21	down-regulated		AL139805.1	down-regulated		SLC6A12	down-regulated		CENPBD1	mRNAup
TMEM220-AS1	down-regulated		GPM6A	down-regulated		RXRG	down-regulated		CD9	mRNAup
AC105036.1	down-regulated		AF124730.2	down-regulated		TAT-AS1	down-regulated		ACP7	mRNAup
AL139082.1	down-regulated		RPL22P19	down-regulated		LINC01055	down-regulated		PRR20G	mRNAup
MIR6859-1	down-regulated		AL355355.1	down-regulated		MS4A6E	down-regulated		GART	mRNAup
AL139351.1	down-regulated		SLC4A10	down-regulated		SLC51B	down-regulated		RAB7B	mRNAup
DDTP1	down-regulated		AC023512.1	down-regulated		HPN	down-regulated		BUB1	mRNAup
THRSP	down-regulated		FAM242C	down-regulated		LINC01597	down-regulated		KRT6A	mRNAup
AC099489.3	down-regulated		ARSF	down-regulated		AC035139.1	down-regulated		SEH1L	mRNAup
AC091057.4	down-regulated		ZMYND10	down-regulated		AC019257.1	down-regulated		TSPAN5	mRNAup
AC027682.6	down-regulated		AL121992.3	down-regulated		LINC02520	down-regulated		EHBP1	mRNAup
MAPT	down-regulated		C2orf73	down-regulated		ALKAL1	down-regulated		TRIP13	mRNAup
CLDN14	down-regulated		AP000344.1	down-regulated		LRRTM1	down-regulated		NEB	mRNAup
AC012653.2	down-regulated		AC099684.2	down-regulated		IL4	down-regulated		RIPPLY2	mRNAup
CU633906.2	down-regulated		SLC12A3	down-regulated		AC004921.1	down-regulated		TMEM154	mRNAup
UCA1	down-regulated		AC099811.6	down-regulated		PLCH1	down-regulated		ZP3	mRNAup
AP001148.1	down-regulated		RPS3AP34	down-regulated		AGR3	down-regulated		DHX9	mRNAup
CAMK2B	down-regulated		RGN	down-regulated		MAGEE2	down-regulated		DUSP11	mRNAup
HOXA11	down-regulated		SOX8	down-regulated		AC108751.5	down-regulated		MFSD2B	mRNAup
AL590093.1	down-regulated		AC104126.1	down-regulated		LHFPL3	down-regulated		GTPBP8	mRNAup
ATP5F1CP1	down-regulated		GOLGA8IP	down-regulated		RBPMS-AS1	down-regulated		PGAM5	mRNAup
ENPP7P2	down-regulated		AC026369.3	down-regulated		HMGB3P7	down-regulated		KREMEN2	mRNAup
MUC3A	down-regulated		ZNF826P	down-regulated		DNAH7	down-regulated		FUT1	mRNAup
RNU6-759P	down-regulated		AC018695.7	down-regulated		AC111200.2	down-regulated		NOCT	mRNAup
EVX1	down-regulated		SLC45A2	down-regulated		AC009974.1	down-regulated		CDK9	mRNAup
KRT18P38	down-regulated		AL021920.2	down-regulated		AC105074.1	down-regulated		KLF7	mRNAup
AC010768.2	down-regulated		AC116337.3	down-regulated		LINC02285	down-regulated		NOP56	mRNAup
HOXC10	down-regulated		CFAP99	down-regulated		CLECL1	down-regulated		LCE3D	mRNAup
AC135803.1	down-regulated		TMEM220-AS1	down-regulated		TMEFF2	down-regulated		IL1R2	mRNAup
POU5F2	down-regulated		CYP4F23P	down-regulated		KNDC1	down-regulated		PIK3CA	mRNAup
MTATP6P26	down-regulated		LINC00271	down-regulated		DRD1	down-regulated		RAB3D	mRNAup
AL035420.1	down-regulated		RPL12P21	down-regulated		TUBA4B	down-regulated		TDG	mRNAup
MFAP1P1	down-regulated		RN7SL180P	down-regulated		RAB19	down-regulated		PMP2	mRNAup
AL161804.1	down-regulated		PCCA-AS1	down-regulated		PCDHA3	down-regulated		XPO1	mRNAup
AC013356.3	down-regulated		AC007993.1	down-regulated		LINC01447	down-regulated		CAVIN4	mRNAup
AL021707.5	down-regulated		ASB9P1	down-regulated		AC008972.1	down-regulated		TFAP2C	mRNAup
AC099518.2	down-regulated		AL121972.1	down-regulated		CR1	down-regulated		SPRR2A	mRNAup
AC129507.3	down-regulated		BX322650.1	down-regulated		PLCE1-AS1	down-regulated		GPR50	mRNAup
GAS2L1P2	down-regulated		ILF2P1	down-regulated		LINC01506	down-regulated		OXGR1	mRNAup
AL512506.2	down-regulated		AC068234.2	down-regulated		ZMYND10	down-regulated		MAGEA6	mRNAup
AC025031.3	down-regulated		AF064860.2	down-regulated		B3GALT2	down-regulated		NAV1	mRNAup
AP003032.1	down-regulated		SYT6	down-regulated		PRDM6	down-regulated		PSMA7	mRNAup
TTLL9	down-regulated		DNAJC9-AS1	down-regulated		NR2F2-AS1	down-regulated		RAMAC	mRNAup
MT-TE	down-regulated		CX3CR1	down-regulated		TRBV12-5	down-regulated		PSMB5	mRNAup
CLIP1-AS1	down-regulated		DNAJC22	down-regulated		RNASE3	down-regulated		RRP12	mRNAup
LACTB2-AS1	down-regulated		ESRRG	down-regulated		LINC01558	down-regulated		BAZ1A	mRNAup
AC011446.1	down-regulated		PROM1	down-regulated		PGM5	down-regulated		NKX1-2	mRNAup
AC137630.3	down-regulated		PRSS57	down-regulated		AP000438.1	down-regulated		ARID3B	mRNAup
AL162171.2	down-regulated		LTC4S	down-regulated		TLR7	down-regulated		PPAT	mRNAup
EPB41L4A-DT	down-regulated		SYT16	down-regulated		SPEF1	down-regulated		ZFP64	mRNAup
CCDC13	down-regulated		AC015908.3	down-regulated		AL022329.1	down-regulated		DNAJB5	mRNAup
AC004877.1	down-regulated		AL353743.3	down-regulated		AC007389.4	down-regulated		FAM83D	mRNAup
ADD3-AS1	down-regulated		AC007272.2	down-regulated		CASC1	down-regulated		SRSF9	mRNAup
TAL2	down-regulated		GDAP1L1	down-regulated		CFAP61	down-regulated		PHF13	mRNAup
PIP5K1P1	down-regulated		AC007637.1	down-regulated		AC087273.2	down-regulated		PAICS	mRNAup
TMEM253	down-regulated		AC092338.2	down-regulated		SPRY4-AS1	down-regulated		KLK10	mRNAup
MTCO3P43	down-regulated		SLC25A39P1	down-regulated		LINC02257	down-regulated		CDV3	mRNAup
MTND4P20	down-regulated		LINC01996	down-regulated		DCDC1	down-regulated		TMEFF1	mRNAup
RPL22P19	down-regulated		LINC00472	down-regulated		AL139807.1	down-regulated		EFNA3	mRNAup
KRT18P3	down-regulated		SMIM2	down-regulated		ARHGEF26-AS1	down-regulated		TBC1D2	mRNAup
TSNAXIP1	down-regulated		TTLL9	down-regulated		SSTR1	down-regulated		MAP2K1	mRNAup
CAPN6	down-regulated		KBTBD11	down-regulated		AC099560.1	down-regulated		SAE1	mRNAup
ANO4	down-regulated		AC025627.1	down-regulated		PCDHA1	down-regulated		COL6A1	mRNAup
AC019171.1	down-regulated		PPIAP90	down-regulated		AC243962.1	down-regulated		IL11	mRNAup
CCDC168	down-regulated		TRPV6	down-regulated		TDGF1	down-regulated		S100A7A	mRNAup
FRMD3	down-regulated		RN7SL8P	down-regulated		AC008758.4	down-regulated		YKT6	mRNAup
CCDC178	down-regulated		LINC00543	down-regulated		ACADL	down-regulated		FBXL18	mRNAup
PTGDR2	down-regulated		HOTTIP	down-regulated		ATP8B5P	down-regulated		KPRP	mRNAup
HOXA7	down-regulated		WDFY3-AS2	down-regulated		HID1-AS1	down-regulated		PPP1R18	mRNAup
BDH2P1	down-regulated		CYP3A4	down-regulated		AC104162.1	down-regulated		MCF2L2	mRNAup
AL031283.2	down-regulated		AC004540.1	down-regulated		DRGX	down-regulated		DLX1	mRNAup
MTND5P11	down-regulated		NUTF2P6	down-regulated		AC003071.1	down-regulated		MFHAS1	mRNAup
RN7SL684P	down-regulated		IL17RB	down-regulated		MYRFL	down-regulated		MYL2	mRNAup
AC007036.2	down-regulated		LINC02313	down-regulated		CAPN13	down-regulated		RBP1	mRNAup
KRT20	down-regulated		AJ011932.1	down-regulated		AL450326.2	down-regulated		QTRT2	mRNAup
AC009159.4	down-regulated		AL136984.1	down-regulated		DPYD-AS1	down-regulated		LEXM	mRNAup
RPL11P3	down-regulated		CYP2C9	down-regulated		LINC02172	down-regulated		CSAG3	mRNAup
ALDH7A1P1	down-regulated		KRT18P23	down-regulated		AC008629.1	down-regulated		KIF3C	mRNAup
AQP7	down-regulated		RCC2P6	down-regulated		AC104667.2	down-regulated		GABRA3	mRNAup
AL359636.2	down-regulated		AC004381.1	down-regulated		NR3C2	down-regulated		FOSL1	mRNAup
ESPNP	down-regulated		MIR302CHG	down-regulated		LINC01934	down-regulated		PYDC1	mRNAup
AL133215.1	down-regulated		AC134407.1	down-regulated		AFF3	down-regulated		GPC1	mRNAup
SYT16	down-regulated		AC084375.1	down-regulated		LILRA2	down-regulated		TINCR	mRNAup
LINC00475	down-regulated		EGOT	down-regulated		AP001528.2	down-regulated		SNCB	mRNAup
SPDYE2B	down-regulated		RNASE13	down-regulated		AC022182.2	down-regulated		GLTP	mRNAup
PF4V1	down-regulated		AC244093.3	down-regulated		ITGAD	down-regulated		NKX2-5	mRNAup
AC007496.3	down-regulated		SLC10A1	down-regulated		METTL7B	down-regulated		KIRREL1	mRNAup
AC005363.2	down-regulated		KRT18P3	down-regulated		YES1P1	down-regulated		IGF2BP3	mRNAup
PSMC1P7	down-regulated		FAM81B	down-regulated		ADGRD1	down-regulated		LCE3E	mRNAup
AP000569.1	down-regulated		CTAGE3P	down-regulated		AL049873.2	down-regulated		ZNF131	mRNAup
EGOT	down-regulated		LINC01819	down-regulated		CAPN9	down-regulated		TET3	mRNAup
SLC9A3	down-regulated		TMEM178B	down-regulated		AC244453.3	down-regulated		PCSK1	mRNAup
RPL32P26	down-regulated		PTGDR2	down-regulated		AC084398.2	down-regulated		PUF60	mRNAup
MIR200B	down-regulated		AC090617.4	down-regulated		TRBV7-7	down-regulated		B4GALNT1	mRNAup
AC099522.1	down-regulated		RPSAP8	down-regulated		AL355922.1	down-regulated		TAF5	mRNAup
AC015813.2	down-regulated		PPEF2	down-regulated		VWA3A	down-regulated		DLX2	mRNAup
HOXB6	down-regulated		AOC1	down-regulated		RPL7AP28	down-regulated		HTR7	mRNAup
RNU6-817P	down-regulated		AGMO	down-regulated		CCR6	down-regulated		MSH6	mRNAup
TTPA	down-regulated		AC110771.1	down-regulated		FHL5	down-regulated		BOP1	mRNAup
AL121768.1	down-regulated		AC127521.1	down-regulated		AC018755.4	down-regulated		MAPK12	mRNAup
AC010487.1	down-regulated		AL353803.2	down-regulated		NPY1R	down-regulated		RNF217	mRNAup
AL034370.1	down-regulated		AC079447.1	down-regulated		HGF	down-regulated		GSDMA	mRNAup
CYP4F2	down-regulated		ORAOV1P1	down-regulated		CFAP206	down-regulated		YWHAQ	mRNAup
HSD17B2	down-regulated		EIF1AX-AS1	down-regulated		AF001548.3	down-regulated		RYR1	mRNAup
AL137798.1	down-regulated		AC010300.1	down-regulated		CROCC2	down-regulated		HES7	mRNAup
RPL5P17	down-regulated		UPB1	down-regulated		MUC13	down-regulated		UBXN7	mRNAup
STPG4	down-regulated		AC008806.1	down-regulated		PTH1R	down-regulated		MAFA	mRNAup
AL031651.1	down-regulated		AC008592.4	down-regulated		P2RX3	down-regulated		APOBEC3B	mRNAup
SMIM6	down-regulated		AC138207.6	down-regulated		CD33	down-regulated		GABRQ	mRNAup
AC114730.1	down-regulated		LINC00158	down-regulated		LINC02288	down-regulated		ALYREF	mRNAup
RN7SL40P	down-regulated		TRPC5OS	down-regulated		MMP2-AS1	down-regulated		RGSL1	mRNAup
AC055876.4	down-regulated		GLP2R	down-regulated		FCN3	down-regulated		PCDHGC5	mRNAup
GPER1	down-regulated		GIPC2	down-regulated		C1orf127	down-regulated		FAM189B	mRNAup
MTCO2P2	down-regulated		SLC28A2	down-regulated		AL353678.1	down-regulated		WNT3A	mRNAup
AC024568.1	down-regulated		NDUFB4P12	down-regulated		LONRF2	down-regulated		CDHR1	mRNAup
RPL37P1	down-regulated		AC005162.2	down-regulated		CLIC4P3	down-regulated		FAM71F1	mRNAup
PM20D1	down-regulated		TMEM232	down-regulated		AL021368.3	down-regulated		SSRP1	mRNAup
AL450326.2	down-regulated		AC092681.3	down-regulated		NBAT1	down-regulated		RPE65	mRNAup
AC106782.1	down-regulated		AC027682.6	down-regulated		AC016894.1	down-regulated		DEFB4A	mRNAup
MTRNR2L12	down-regulated		PGM5-AS1	down-regulated		ZEB2-AS1	down-regulated		UMPS	mRNAup
AL109659.2	down-regulated		ACTBP14	down-regulated		SKAP1-AS1	down-regulated		ASAP1	mRNAup
RNU6ATAC27P	down-regulated		XIST	down-regulated		ALAS2	down-regulated		IKBKG	mRNAup
SEPHS1P6	down-regulated		AC104758.2	down-regulated		AC133961.1	down-regulated		LARGE2	mRNAup
RAI1-AS1	down-regulated		BCL2L15	down-regulated		LINC02345	down-regulated		AGO2	mRNAup
ADAMTS7P1	down-regulated		LINC02718	down-regulated		GRM3	down-regulated		LRRC42	mRNAup
AL355297.2	down-regulated		BHMT2	down-regulated		FXYD2	down-regulated		DUSP14	mRNAup
MTCO2P22	down-regulated		MTCO1P11	down-regulated		AC068234.2	down-regulated		CORO1C	mRNAup
AC009078.3	down-regulated		AL109659.2	down-regulated		ADRA1B	down-regulated		WNT5A	mRNAup
IFNWP2	down-regulated		LGR4-AS1	down-regulated		KRT18P23	down-regulated		GALNT2	mRNAup
SOAT2	down-regulated		TMEM238L	down-regulated		HP	down-regulated		WNT9A	mRNAup
STK19B	down-regulated		AC097381.1	down-regulated		AC097468.1	down-regulated		TMEM185B	mRNAup
AC243571.2	down-regulated		AL109983.1	down-regulated		GLP2R	down-regulated		STK3	mRNAup
AC009034.1	down-regulated		RARRES2P1	down-regulated		AC027449.1	down-regulated		BAG3	mRNAup
AL138787.1	down-regulated		MAPT	down-regulated		AC010342.1	down-regulated		PRKDC	mRNAup
LINC01750	down-regulated		NPIPB9	down-regulated		AC092296.2	down-regulated		NOL11	mRNAup
RPS3AP54	down-regulated		NACAP8	down-regulated		AP004609.3	down-regulated		PSMD2	mRNAup
LINC01933	down-regulated		ALAS2	down-regulated		AL158070.1	down-regulated		ZNF740	mRNAup
L1CAM	down-regulated		AL020995.2	down-regulated		MAMDC2	down-regulated		MVD	mRNAup
AF287957.1	down-regulated		AC131571.1	down-regulated		MNX1-AS2	down-regulated		CALB2	mRNAup
AC009032.1	down-regulated		RPL21P1	down-regulated		GAPT	down-regulated		CEBPZ	mRNAup
MIR200A	down-regulated		AC092681.2	down-regulated		TRAV36DV7	down-regulated		MAGEA3	mRNAup
AC063944.3	down-regulated		PPIAP41	down-regulated		FCGR1B	down-regulated		PRDM13	mRNAup
AL365181.2	down-regulated		AC073657.2	down-regulated		FAM92B	down-regulated		KLK12	mRNAup
FAM242C	down-regulated		AL138960.1	down-regulated		LINC02147	down-regulated		TPD52L1	mRNAup
COBL	down-regulated		PSD2	down-regulated		AC027277.2	down-regulated		SREBF2	mRNAup
AC013549.1	down-regulated		DPY19L2P2	down-regulated		CHL1-AS2	down-regulated		TGFB1	mRNAup
ORAOV1P1	down-regulated		CYP4Z2P	down-regulated		KRT18P27	down-regulated		LRRC8E	mRNAup
AC005920.1	down-regulated		RPSAP1	down-regulated		PON3	down-regulated		PHF24	mRNAup
RPS17P2	down-regulated		AC008758.4	down-regulated		KLHL32	down-regulated		GAST	mRNAup
ASS1P9	down-regulated		AC104964.4	down-regulated		EEF1A1P2	down-regulated		C1orf131	mRNAup
CNTN4	down-regulated		MYRIP	down-regulated		LINC01996	down-regulated		ASB1	mRNAup
MTRNR2L3	down-regulated		C4B	down-regulated		CYP4A22	down-regulated		KRT31	mRNAup
AC015660.3	down-regulated		ZNF663P	down-regulated		LINC02289	down-regulated		ABCA12	mRNAup
AC097534.1	down-regulated		NDUFB4P11	down-regulated		B3GAT1	down-regulated		YES1	mRNAup
AC016405.1	down-regulated		HOXB8	down-regulated		S100Z	down-regulated		CSAG1	mRNAup
AP000302.1	down-regulated		AC093510.2	down-regulated		IL6R-AS1	down-regulated		FAM104A	mRNAup
RHOXF1	down-regulated		RNF157-AS1	down-regulated		MAP6	down-regulated		TBC1D10A	mRNAup
AC092849.1	down-regulated		FP325335.1	down-regulated		PTCRA	down-regulated		UBE2T	mRNAup
LRRC31	down-regulated		AP000763.2	down-regulated		AC110998.1	down-regulated		SLC2A1	mRNAup
AC091132.5	down-regulated		OMP	down-regulated		P2RY14	down-regulated		METAP1	mRNAup
AC092681.2	down-regulated		RN7SL477P	down-regulated		CFAP77	down-regulated		PRDM1	mRNAup
AL139805.1	down-regulated		PALM3	down-regulated		LY86-AS1	down-regulated		PTDSS1	mRNAup
AL591767.3	down-regulated		MAG	down-regulated		PRELID1P3	down-regulated		ECT2	mRNAup
AC117503.1	down-regulated		ATP1A4	down-regulated		AL592494.2	down-regulated		OLFM2	mRNAup
SLC25A48	down-regulated		CPNE9	down-regulated		AL359979.2	down-regulated		HMGCR	mRNAup
SEMA6A-AS2	down-regulated		KRT18P1	down-regulated		AP003717.1	down-regulated		SOGA1	mRNAup
POU5F1	down-regulated		KRT18P20	down-regulated		HFM1	down-regulated		KDM5B	mRNAup
LINC01798	down-regulated		AP000866.2	down-regulated		AL157996.1	down-regulated		NECTIN1	mRNAup
AP003170.4	down-regulated		GPR45	down-regulated		AC090136.3	down-regulated		FAM126A	mRNAup
MTND6P4	down-regulated		MTND6P22	down-regulated		APOC1P1	down-regulated		EXT1	mRNAup
AC111170.1	down-regulated		AC090950.1	down-regulated		KRT18P16	down-regulated		RCOR1	mRNAup
A3GALT2	down-regulated		AL360219.2	down-regulated		GABBR2	down-regulated		NXN	mRNAup
LINC02060	down-regulated		EVX1	down-regulated		AC243829.4	down-regulated		ZMYND19	mRNAup
AQP6	down-regulated		RERGL	down-regulated		SPIB	down-regulated		SLC22A23	mRNAup
BNC2-AS1	down-regulated		PPIAL4G	down-regulated		AL137247.1	down-regulated		MPHOSPH10	mRNAup
TBC1D3L	down-regulated		PGM5P4	down-regulated		ZNF486	down-regulated		PGF	mRNAup
KRT18P52	down-regulated		WDR93	down-regulated		MIR548AA2	down-regulated		TULP1	mRNAup
TSIX	down-regulated		MORN5	down-regulated		KLKB1	down-regulated		NAE1	mRNAup
REP15	down-regulated		AC009097.4	down-regulated		PRR26	down-regulated		LVRN	mRNAup
AP006621.1	down-regulated		RNA5SP154	down-regulated		AMBP	down-regulated		ARL4D	mRNAup
AC068790.7	down-regulated		AC007490.1	down-regulated		CAPN8	down-regulated		CEP55	mRNAup
TH	down-regulated		CIDEC	down-regulated		AC104996.2	down-regulated		TENM3	mRNAup
AP000346.4	down-regulated		TRIM31	down-regulated		AC008514.1	down-regulated		CD163L1	mRNAup
AC004947.1	down-regulated		RNU6-125P	down-regulated		FO681548.1	down-regulated		CTPS1	mRNAup
AC092338.2	down-regulated		AC100793.2	down-regulated		RPS26P47	down-regulated		SYNCRIP	mRNAup
AC113189.4	down-regulated		AGRP	down-regulated		TSPAN8	down-regulated		GOLGA2	mRNAup
CRYZL2P-SEC16B	down-regulated		AC068025.2	down-regulated		AP001972.1	down-regulated		ESCO1	mRNAup
AC137834.1	down-regulated		CATIP-AS2	down-regulated		HNF4G	down-regulated		DPF1	mRNAup
AKR7A3	down-regulated		C4A	down-regulated		RPL36AP29	down-regulated		NOP14	mRNAup
CFAP44-AS1	down-regulated		AC087286.4	down-regulated		ARMC4	down-regulated		EIF4EBP1	mRNAup
SRRM1P3	down-regulated		ADH6	down-regulated		LINC01281	down-regulated		CEP19	mRNAup
FRMPD1	down-regulated		LYG1	down-regulated		RPL21P123	down-regulated		KCMF1	mRNAup
AOC1	down-regulated		AC092809.3	down-regulated		SIGLEC14	down-regulated		SELENOI	mRNAup
KCNIP3	down-regulated		REN	down-regulated		TEKT3	down-regulated		GGCT	mRNAup
AC118755.2	down-regulated		C17orf50	down-regulated		HIF3A	down-regulated		COL16A1	mRNAup
AC013643.3	down-regulated		AC133065.1	down-regulated		AC012485.2	down-regulated		ERLIN1	mRNAup
DPF3	down-regulated		AC021491.4	down-regulated		AC011511.5	down-regulated		RBFOX2	mRNAup
GPT	down-regulated		TRBV6-4	down-regulated		TFEC	down-regulated		RAD51AP1	mRNAup
AC096649.2	down-regulated		MIR10B	down-regulated		TNR	down-regulated		HAT1	mRNAup
AC004948.1	down-regulated		AL512844.1	down-regulated		CFAP52	down-regulated		ENO1	mRNAup
RPL21P1	down-regulated		RPL34P27	down-regulated		ASB4	down-regulated		AC107871.1	mRNAup
FOXP1-IT1	down-regulated		AC104996.2	down-regulated		RS1	down-regulated		MB21D2	mRNAup
AL772337.3	down-regulated		KRT18P18	down-regulated		AC020907.3	down-regulated		OTUB1	mRNAup
L29074.1	down-regulated		AC092162.3	down-regulated		PCDHA7	down-regulated		SDR9C7	mRNAup
TAC1	down-regulated		CEACAMP5	down-regulated		LINC01714	down-regulated		EXOSC4	mRNAup
ASIP	down-regulated		SLC51B	down-regulated		AC087477.6	down-regulated		EME1	mRNAup
AC021231.2	down-regulated		ITGAD	down-regulated		AC016924.1	down-regulated		PNLIPRP3	mRNAup
SIDT1-AS1	down-regulated		AC010487.1	down-regulated		AC005180.1	down-regulated		CENPP	mRNAup
AL360181.4	down-regulated		AC018755.1	down-regulated		COL4A2-AS2	down-regulated		ADAM17	mRNAup
BHMT2	down-regulated		AC025871.2	down-regulated		AC008957.1	down-regulated		NDRG4	mRNAup
SHISA9	down-regulated		AL365259.1	down-regulated		PALM3	down-regulated		CARD17	mRNAup
LINC01337	down-regulated		MTND4P24	down-regulated		PLA2G2D	down-regulated		EIF4H	mRNAup
CLEC4F	down-regulated		AC004877.1	down-regulated		C3orf86	down-regulated		LINC00634	mRNAup
RPL18P10	down-regulated		SF3A3P2	down-regulated		ZMYND12	down-regulated		SPRR2G	mRNAup
IDSP1	down-regulated		AC092794.2	down-regulated		PCDHA10	down-regulated		IL1B	mRNAup
AC005062.1	down-regulated		FIGNL2	down-regulated		BTLA	down-regulated		RNF8	mRNAup
AL136982.6	down-regulated		RPL32P26	down-regulated		SULT1A2	down-regulated		EIF1AD	mRNAup
AL136984.1	down-regulated		PSORS1C3	down-regulated		CACNA1D	down-regulated		CPT1C	mRNAup
MFSD13B	down-regulated		FAM90A25P	down-regulated		ZRANB2-AS2	down-regulated		NOD2	mRNAup
AC093525.7	down-regulated		AC008667.1	down-regulated		AC021491.4	down-regulated		GPR68	mRNAup
MCM8-AS1	down-regulated		AC008543.3	down-regulated		C4B	down-regulated		GRK7	mRNAup
AC018755.3	down-regulated		RPL21P123	down-regulated		SLC34A2	down-regulated		R3HDM1	mRNAup
AC010538.1	down-regulated		VIL1	down-regulated		WT1	down-regulated		MCMBP	mRNAup
SERPINA5	down-regulated		AC004982.1	down-regulated		CAPN6	down-regulated		MMP10	mRNAup
FAM47E	down-regulated		AC117503.1	down-regulated		ANGPT1	down-regulated		IVL	mRNAup
MFAP3L	down-regulated		RNF157	down-regulated		AL035665.1	down-regulated		ZNF280A	mRNAup
AC092757.3	down-regulated		AC005062.1	down-regulated		AL121949.1	down-regulated		PGLYRP3	mRNAup
AL645939.2	down-regulated		AC135803.1	down-regulated		MCEMP1	down-regulated		ARTN	mRNAup
CDH2	down-regulated		AC110048.2	down-regulated		TTC39A-AS1	down-regulated		TMPRSS11A	mRNAup
AL121845.4	down-regulated		CCDC30	down-regulated		HS3ST2	down-regulated		RPL39L	mRNAup
AC016737.2	down-regulated		SPDYE7P	down-regulated		RETN	down-regulated		KHNYN	mRNAup
OR1H1P	down-regulated		LINC01843	down-regulated		AP000569.1	down-regulated		HMCES	mRNAup
LEAP2	down-regulated		AC099509.1	down-regulated		TEX26-AS1	down-regulated		MYO1B	mRNAup
PTTG2	down-regulated		ACOT6	down-regulated		OR1L8	down-regulated		PANX1	mRNAup
USP50	down-regulated		AP000302.1	down-regulated		ZFP2	down-regulated		PLAU	mRNAup
SLC23A3	down-regulated		L3MBTL4-AS1	down-regulated		AC130456.3	down-regulated		PKP1	mRNAup
AC011944.2	down-regulated		ADORA1	down-regulated		BNIP3P26	down-regulated		CDK5RAP2	mRNAup
NR2E3	down-regulated		RPL37P1	down-regulated		CAPSL	down-regulated		KCTD15	mRNAup
GPHA2	down-regulated		UNC93B3	down-regulated		FCGR1CP	down-regulated		EIF3B	mRNAup
CD24P4	down-regulated		ITLN1	down-regulated		AP001636.3	down-regulated		CDH13	mRNAup
AP000344.2	down-regulated		MMP24	down-regulated		SERF1A	down-regulated		B4GALNT4	mRNAup
AC018552.2	down-regulated		AL034370.1	down-regulated		SIRPB1	down-regulated		GJA1	mRNAup
HOXA6	down-regulated		AP001636.3	down-regulated		ILF2P1	down-regulated		ACTL6A	mRNAup
AL589739.1	down-regulated		AL163636.3	down-regulated		RNASE2	down-regulated		EDDM13	mRNAup
SKINT1L	down-regulated		LINC01645	down-regulated		TMEM155	down-regulated		TRDN	mRNAup
KLHL30-AS1	down-regulated		MIR6784	down-regulated		AL031963.2	down-regulated		PCYT1A	mRNAup
AC092338.1	down-regulated		PCDHA12	down-regulated		FCRL2	down-regulated		EXOC6B	mRNAup
AL139246.2	down-regulated		LHFPL3	down-regulated		APOC2	down-regulated		YEATS2	mRNAup
AC007405.3	down-regulated		UNC5CL	down-regulated		AC025280.2	down-regulated		EDC3	mRNAup
ADORA2A-AS1	down-regulated		AC090058.1	down-regulated		GPR88	down-regulated		MRPL47	mRNAup
HOXB-AS2	down-regulated		HRCT1	down-regulated		STK33	down-regulated		NOP2	mRNAup
UGT2B11	down-regulated		IFNL3P1	down-regulated		AC068987.3	down-regulated		TAF2	mRNAup
AL157938.2	down-regulated		AC011944.2	down-regulated		ANKRD45	down-regulated		KATNA1	mRNAup
OXER1	down-regulated		KRT18P27	down-regulated		TNNI3K	down-regulated		PPP2R1B	mRNAup
SULT1A3	down-regulated		FAM149A	down-regulated		RPL12P27	down-regulated		JAG1	mRNAup
FAM71D	down-regulated		NMD3P1	down-regulated		MIR7848	down-regulated		HCAR3	mRNAup
HOXC4	down-regulated		FUT9	down-regulated		KBTBD11-OT1	down-regulated		RNASE10	mRNAup
AC009549.1	down-regulated		AC127537.1	down-regulated		AC008802.1	down-regulated		OR7A5	mRNAup
ZFP2	down-regulated		ABCC6	down-regulated		EFCAB12	down-regulated		ZW10	mRNAup
MTATP8P1	down-regulated		AL138787.1	down-regulated		KL	down-regulated		DLX6	mRNAup
AC067904.2	down-regulated		AC140725.1	down-regulated		TRAV23DV6	down-regulated		EMP1	mRNAup
C19orf67	down-regulated		AC073342.1	down-regulated		ZNF702P	down-regulated		PPP1CC	mRNAup
ENTPD2	down-regulated		MIR4728	down-regulated		SEC22B4P	down-regulated		JMJD7	mRNAup
AMH	down-regulated		RBP4	down-regulated		LINC01513	down-regulated		RCOR2	mRNAup
C9orf170	down-regulated		CCDC196	down-regulated		PLPPR1	down-regulated		PRKAB2	mRNAup
BCO2	down-regulated		AC009065.2	down-regulated		AC007790.1	down-regulated		ZIC1	mRNAup
AC141586.2	down-regulated		MIR135A1	down-regulated		AC116351.1	down-regulated		SMOX	mRNAup
OGFOD1P1	down-regulated		SPDYE16	down-regulated		AP003465.2	down-regulated		KRT76	mRNAup
FRMPD2B	down-regulated		AC093797.1	down-regulated		KRT89P	down-regulated		SNRPD1	mRNAup
PDIA3P2	down-regulated		RXFP4	down-regulated		HORMAD2	down-regulated		ZRANB1	mRNAup
ENPP7P4	down-regulated		SIGLEC8	down-regulated		PPIL6	down-regulated		PTGES3L	mRNAup
TNFRSF14-AS1	down-regulated		AF213884.3	down-regulated		AC244517.6	down-regulated		GM2A	mRNAup
OR10V2P	down-regulated		SHH	down-regulated		TLR10	down-regulated		CCDC86	mRNAup
AP006621.4	down-regulated		AC015813.7	down-regulated		PLA1A	down-regulated		MAP6D1	mRNAup
AL391094.1	down-regulated		AC009831.3	down-regulated		AQP2	down-regulated		GFM1	mRNAup
AC025430.1	down-regulated		TMEM169	down-regulated		HSPE1P18	down-regulated		MYO5A	mRNAup
AC103591.2	down-regulated		TMEM51-AS1	down-regulated		LINC00544	down-regulated		FAM220A	mRNAup
AC027279.1	down-regulated		FRMPD2B	down-regulated		RPS26P35	down-regulated		GNG4	mRNAup
AC126118.1	down-regulated		AC084782.3	down-regulated		RSPH4A	down-regulated		PPP2R2C	mRNAup
AC012557.2	down-regulated		AC091057.4	down-regulated		ATOH8	down-regulated		PNPLA1	mRNAup
GPR62	down-regulated		PDE11A	down-regulated		ADGRG2	down-regulated		NOC2L	mRNAup
MIR3936HG	down-regulated		LINC02391	down-regulated		SPAAR	down-regulated		RNF168	mRNAup
AC068533.3	down-regulated		SIDT1-AS1	down-regulated		C1orf194	down-regulated		ISG20L2	mRNAup
JPH2	down-regulated		AL592114.3	down-regulated		ANKFN1	down-regulated		MED6	mRNAup
AC004233.2	down-regulated		MICOS10P2	down-regulated		BX842568.3	down-regulated		DSG1	mRNAup
ALDH1A2	down-regulated		ZNF69	down-regulated		TNFSF8	down-regulated		MTBP	mRNAup
TMEM132C	down-regulated		EHMT2-AS1	down-regulated		AL117328.1	down-regulated		GID8	mRNAup
ARHGAP6	down-regulated		AC104260.2	down-regulated		KRT18P52	down-regulated		SPRR1A	mRNAup
TBC1D3E	down-regulated		PCDH10	down-regulated		AC073592.10	down-regulated		ATG101	mRNAup
TPM1-AS	down-regulated		ANO5	down-regulated		CHRDL1	down-regulated		RPS6KB2	mRNAup
AC040934.1	down-regulated		RPL7AP3	down-regulated		PPIAP90	down-regulated		AIMP2	mRNAup
AL359922.3	down-regulated		RPS20P2	down-regulated		RNU6-407P	down-regulated		KPNA1	mRNAup
AC015727.1	down-regulated		AC034111.1	down-regulated		LINC01504	down-regulated		ALDH3B2	mRNAup
AC113361.1	down-regulated		EDA2R	down-regulated		AC027288.3	down-regulated		COL13A1	mRNAup
HOXB4	down-regulated		LINC01778	down-regulated		AL035701.1	down-regulated		MED30	mRNAup
GLYATL1P1	down-regulated		AC010201.1	down-regulated		RNU6-403P	down-regulated		AC135050.2	mRNAup
YBX1P4	down-regulated		CABCOCO1	down-regulated		LINC01612	down-regulated		RAN	mRNAup
LINC01833	down-regulated		C5orf49	down-regulated		AP002954.1	down-regulated		HMGA2	mRNAup
MYRF	down-regulated		AP001148.1	down-regulated		KRT18P19	down-regulated		RPF2	mRNAup
AP000345.2	down-regulated		TMPRSS3	down-regulated		PRSS51	down-regulated		EIF4G1	mRNAup
FOXD4L1	down-regulated		AC005899.6	down-regulated		AQP7	down-regulated		C1orf109	mRNAup
AL031708.1	down-regulated		FHIT	down-regulated		PPIAL4G	down-regulated		ANGPT2	mRNAup
PLIN4	down-regulated		AL109947.1	down-regulated		ADH1C	down-regulated		SPINDOC	mRNAup
AC104836.1	down-regulated		DNAH6	down-regulated		AC005021.1	down-regulated		NSUN2	mRNAup
OCLNP1	down-regulated		RPSAP21	down-regulated		PLN	down-regulated		NCAPH	mRNAup
C1orf146	down-regulated		AC002044.1	down-regulated		AC020928.1	down-regulated		ARSI	mRNAup
MTND1P23	down-regulated		AC009032.1	down-regulated		TRAV38-1	down-regulated		KCNK2	mRNAup
AC118344.1	down-regulated		PPP1R42	down-regulated		SULT1C4	down-regulated		MSL2	mRNAup
C8orf74	down-regulated		EFCAB5	down-regulated		AC090181.3	down-regulated		ODF2	mRNAup
AC008543.4	down-regulated		MNX1	down-regulated		AC123912.4	down-regulated		TNC	mRNAup
MYO15B	down-regulated		AC012354.2	down-regulated		AC008758.2	down-regulated		SOCS7	mRNAup
RAB5CP1	down-regulated		FOXD4L3	down-regulated		LONRF3	down-regulated		TTLL12	mRNAup
AL359715.2	down-regulated		AC027279.1	down-regulated		RNF126P1	down-regulated		DVL3	mRNAup
IQSEC3	down-regulated		GP6	down-regulated		AC008514.2	down-regulated		FAM83G	mRNAup
NR2F2-AS1	down-regulated		CTAGE1	down-regulated		VXN	down-regulated		MN1	mRNAup
AC009831.3	down-regulated		HKDC1	down-regulated		PCOLCE-AS1	down-regulated		PSMG3	mRNAup
HOXB5	down-regulated		AC099329.1	down-regulated		TRGC1	down-regulated		SLC7A5	mRNAup
TTBK1	down-regulated		AGAP11	down-regulated		RPL10P19	down-regulated		KLK13	mRNAup
RPSAP70	down-regulated		CLEC4F	down-regulated		HHIP	down-regulated		TBPL1	mRNAup
AL133255.1	down-regulated		SMCO3	down-regulated		AL357054.4	down-regulated		CALML3	mRNAup
HAND2	down-regulated		AP001626.1	down-regulated		SLC19A3	down-regulated		RALA	mRNAup
AC116337.3	down-regulated		AC026111.1	down-regulated		RBP2	down-regulated		ACAT2	mRNAup
AC011330.1	down-regulated		AC008543.4	down-regulated		LINC00336	down-regulated		CAGE1	mRNAup
AC120498.4	down-regulated		AKR7A3	down-regulated		RPS7P15	down-regulated		PPIF	mRNAup
AP001178.2	down-regulated		SIRPAP1	down-regulated		SEMA3E	down-regulated		GBP6	mRNAup
RNF157-AS1	down-regulated		DYNLRB2	down-regulated		GDF10	down-regulated		SLC20A2	mRNAup
SYCE1L	down-regulated		FOXP1-IT1	down-regulated		RBMXP4	down-regulated		JARID2	mRNAup
PCP2	down-regulated		AC018755.3	down-regulated		LRRC37A7P	down-regulated		CELSR1	mRNAup
AL121723.1	down-regulated		MAJIN	down-regulated		WDR78	down-regulated		IGLON5	mRNAup
EFNA2	down-regulated		AC102945.2	down-regulated		CD40LG	down-regulated		MRGPRX3	mRNAup
Z94721.2	down-regulated		DUSP5P2	down-regulated		SPINK1	down-regulated		RCE1	mRNAup
AC026150.2	down-regulated		ZBTB16	down-regulated		AL356124.1	down-regulated		HSF1	mRNAup
LINC01819	down-regulated		TSNAXIP1	down-regulated		AL139125.1	down-regulated		TMEM249	mRNAup
AC008629.1	down-regulated		PLA1A	down-regulated		FTLP17	down-regulated		DSG3	mRNAup
AL138820.1	down-regulated		AC104836.1	down-regulated		LY6H	down-regulated		KCNH5	mRNAup
RNF183	down-regulated		OLFM4	down-regulated		CNGA3	down-regulated		HJURP	mRNAup
AC010203.1	down-regulated		EFHB	down-regulated		ENPP3	down-regulated		PRELID3A	mRNAup
LINC01402	down-regulated		MRO	down-regulated		CCR2	down-regulated		ARC	mRNAup
WFIKKN1	down-regulated		AC013356.3	down-regulated		RNF180	down-regulated		PDCD11	mRNAup
MRPS36P1	down-regulated		AL121989.1	down-regulated		LINC00671	down-regulated		MTSS1	mRNAup
CCNI2	down-regulated		AP007216.2	down-regulated		AL138767.3	down-regulated		FERMT1	mRNAup
CU633967.1	down-regulated		TAFA1	down-regulated		AC131888.1	down-regulated		SPRR3	mRNAup
MYRIP	down-regulated		MTCO2P2	down-regulated		AC111182.1	down-regulated		NOLC1	mRNAup
AC021491.2	down-regulated		SEPHS1P6	down-regulated		AC068533.2	down-regulated		ZBED2	mRNAup
RPSAP13	down-regulated		AL035420.1	down-regulated		MIR4728	down-regulated		RGMA	mRNAup
SF3A3P2	down-regulated		ARL6IP1P2	down-regulated		IDO2	down-regulated		CCT5	mRNAup
NUTF2P6	down-regulated		FAM163B	down-regulated		TERB1	down-regulated		PSMD7	mRNAup
MNX1	down-regulated		KRT18P10	down-regulated		GNA14	down-regulated		ELP1	mRNAup
GFI1B	down-regulated		AC023794.7	down-regulated		AC063961.1	down-regulated		CHRNA9	mRNAup
CA3-AS1	down-regulated		AL355297.2	down-regulated		KCNV1	down-regulated		BCL11A	mRNAup
BTBD16	down-regulated		APOC4-APOC2	down-regulated		BMP3	down-regulated		PDZD4	mRNAup
SLC36A2	down-regulated		AC241377.4	down-regulated		AC105235.1	down-regulated		TM4SF19-TCTEX1D2	mRNAup
AC092757.2	down-regulated		AF233439.1	down-regulated		AC138894.1	down-regulated		TXN	mRNAup
FRMPD2	down-regulated		AC103760.1	down-regulated		KCNJ5	down-regulated		FANCE	mRNAup
AC087257.2	down-regulated		HCG9	down-regulated		AC007272.1	down-regulated		GMPS	mRNAup
AC005156.1	down-regulated		AC015727.1	down-regulated		HSD17B13	down-regulated		TRIT1	mRNAup
FAM149A	down-regulated		AL035420.3	down-regulated		SLC26A9	down-regulated		EMILIN3	mRNAup
AC211433.2	down-regulated		SERPINA5	down-regulated		FPGT-TNNI3K	down-regulated		ATP2A2	mRNAup
AL136380.1	down-regulated		AC099340.1	down-regulated		PRR15L	down-regulated		SNAI2	mRNAup
AC233699.1	down-regulated		KRT18P16	down-regulated		LINC01843	down-regulated		TEX101	mRNAup
CLDN19	down-regulated		PRICKLE2-AS3	down-regulated		AC091965.1	down-regulated		CCDC58	mRNAup
AC010201.1	down-regulated		RGPD1	down-regulated		AL078459.1	down-regulated		SPRR2E	mRNAup
AC024592.2	down-regulated		RN7SL40P	down-regulated		FAM184A	down-regulated		TP63	mRNAup
AL162411.1	down-regulated		AC005281.1	down-regulated		AC133552.3	down-regulated		WDR66	mRNAup
AL121989.1	down-regulated		GUSBP3	down-regulated		SPNS3	down-regulated		C3orf67	mRNAup
AC079781.3	down-regulated		SLC25A34-AS1	down-regulated		SCIMP	down-regulated		XPO5	mRNAup
ACACB	down-regulated		TNFRSF14-AS1	down-regulated		PCDHB3	down-regulated		GPR15	mRNAup
KRT18P18	down-regulated		GLDC	down-regulated		AC023090.1	down-regulated		ZNF799	mRNAdown
AL606468.1	down-regulated		AC016252.1	down-regulated		AL096855.2	down-regulated		KLHL14	mRNAdown
SLC25A14P1	down-regulated		FOXD4	down-regulated		GALNTL6	down-regulated		COPRS	mRNAdown
MIR548AR	down-regulated		LINC00867	down-regulated		AL590004.3	down-regulated		TMEM42	mRNAdown
AK3P5	down-regulated		PIFO	down-regulated		CHST5	down-regulated		NOSTRIN	mRNAdown
PPIAP36	down-regulated		AC135586.2	down-regulated		AC129507.3	down-regulated		MAP3K3	mRNAdown
AC006122.1	down-regulated		AC129929.1	down-regulated		AL645924.1	down-regulated		TMEM132E	mRNAdown
SHBG	down-regulated		NKAIN4	down-regulated		CYP4B1	down-regulated		BBS12	mRNAdown
IFITM4P	down-regulated		SLC18A1	down-regulated		AC006539.1	down-regulated		LRGUK	mRNAdown
IL19	down-regulated		MTCO1P53	down-regulated		AQP8	down-regulated		ZNF83	mRNAdown
AL590004.3	down-regulated		CEROX1	down-regulated		AC007552.2	down-regulated		ARHGEF9	mRNAdown
AC079416.2	down-regulated		AC243571.2	down-regulated		AC104306.1	down-regulated		VWA5A	mRNAdown
RPL10P12	down-regulated		NEK5	down-regulated		PGM5P3-AS1	down-regulated		GCC2	mRNAdown
DDO	down-regulated		MFSD13B	down-regulated		OR52K3P	down-regulated		PTP4A2	mRNAdown
ZMAT1	down-regulated		HSPA8P18	down-regulated		CFAP74	down-regulated		CLCN4	mRNAdown
AC093510.2	down-regulated		AC092338.1	down-regulated		NUTF2P6	down-regulated		MMP15	mRNAdown
DNAAF3	down-regulated		LINC01091	down-regulated		DKK2	down-regulated		MTMR14	mRNAdown
IFIT1B	down-regulated		AC007036.2	down-regulated		MTND5P12	down-regulated		RBPMS	mRNAdown
AC024267.4	down-regulated		AL021368.1	down-regulated		TRBV9	down-regulated		CYSTM1	mRNAdown
AC009779.4	down-regulated		AC022432.1	down-regulated		AL356317.1	down-regulated		KLKB1	mRNAdown
RPL34P18	down-regulated		GOLGA8O	down-regulated		CASP17P	down-regulated		FXYD2	mRNAdown
AC090058.1	down-regulated		RPL12P25	down-regulated		AC008026.2	down-regulated		ZNF487	mRNAdown
AC093151.2	down-regulated		AL138847.1	down-regulated		RORC	down-regulated		HOXB5	mRNAdown
GOLGA2P5	down-regulated		RNU6-759P	down-regulated		AC060234.2	down-regulated		TSTD3	mRNAdown
ELAVL2	down-regulated		AC011676.2	down-regulated		AL356750.1	down-regulated		CADPS2	mRNAdown
GNRH1	down-regulated		AL031666.2	down-regulated		C11orf16	down-regulated		NTN4	mRNAdown
AC010761.6	down-regulated		EXOC3L4	down-regulated		ARHGAP6	down-regulated		PECR	mRNAdown
AP000866.2	down-regulated		RPL18P10	down-regulated		AC107072.2	down-regulated		IFNAR1	mRNAdown
AC093726.2	down-regulated		AC055876.4	down-regulated		AC068860.1	down-regulated		LAMTOR5	mRNAdown
ABRA	down-regulated		UPK3A	down-regulated		CD72	down-regulated		RAB11FIP4	mRNAdown
AP001267.2	down-regulated		PSME2P6	down-regulated		KCNN2	down-regulated		FPGT-TNNI3K	mRNAdown
AC093525.10	down-regulated		SORBS2	down-regulated		NTNG1	down-regulated		KIAA0232	mRNAdown
RNU6-583P	down-regulated		AC012085.2	down-regulated		ILDR2	down-regulated		NOL4L	mRNAdown
AL031666.2	down-regulated		IGBP1-AS2	down-regulated		FTH1P22	down-regulated		CALCOCO2	mRNAdown
AP000346.1	down-regulated		SLC16A4	down-regulated		RGS18	down-regulated		ARHGAP26	mRNAdown
C10orf67	down-regulated		AC068987.3	down-regulated		AL133371.2	down-regulated		JAGN1	mRNAdown
MMEL1	down-regulated		METTL7B	down-regulated		ERICH5	down-regulated		CPNE9	mRNAdown
AC004223.2	down-regulated		TTPA	down-regulated		FAM177B	down-regulated		CPO	mRNAdown
Z73965.1	down-regulated		PGM5	down-regulated		AC007336.2	down-regulated		SLC30A2	mRNAdown
TMEM171	down-regulated		BEND7	down-regulated		AC004982.1	down-regulated		ABHD14B	mRNAdown
AC078777.1	down-regulated		AC027348.1	down-regulated		CLTRN	down-regulated		ALDH5A1	mRNAdown
AP001178.3	down-regulated		PLEKHA6	down-regulated		LINC01484	down-regulated		SERPINA4	mRNAdown
FAM215A	down-regulated		MTNR1A	down-regulated		AC104964.1	down-regulated		TK2	mRNAdown
LINC00271	down-regulated		AC092849.1	down-regulated		AC104971.3	down-regulated		KLHDC1	mRNAdown
LINC02235	down-regulated		AC093732.1	down-regulated		NEK5	down-regulated		LGALS2	mRNAdown
SYCE2	down-regulated		LRRIQ1	down-regulated		IQUB	down-regulated		C4B	mRNAdown
AC090950.1	down-regulated		AC007613.1	down-regulated		CDR1	down-regulated		OCEL1	mRNAdown
FIGN	down-regulated		STARD13-AS	down-regulated		AC011899.3	down-regulated		MRAS	mRNAdown
AC073283.1	down-regulated		AC110774.1	down-regulated		AL157786.1	down-regulated		PPP5D1	mRNAdown
HOTAIR	down-regulated		MYRF	down-regulated		AL138960.1	down-regulated		IFT172	mRNAdown
AC099329.1	down-regulated		ZNF709	down-regulated		AC025154.2	down-regulated		ELP6	mRNAdown
AC233992.3	down-regulated		FAM238A	down-regulated		IGSF21	down-regulated		CLDN3	mRNAdown
AC009078.2	down-regulated		DNAI1	down-regulated		KCNG2	down-regulated		SLC25A4	mRNAdown
YBX2	down-regulated		ALDH1L1	down-regulated		TRBV21-1	down-regulated		SESN1	mRNAdown
FAM131C	down-regulated		SYCP3	down-regulated		AC022126.1	down-regulated		MAPKAPK3	mRNAdown
AC011411.1	down-regulated		AC005759.1	down-regulated		CR1L	down-regulated		TMEM175	mRNAdown
HNF4G	down-regulated		PWAR1	down-regulated		RPL26P30	down-regulated		ERBB2	mRNAdown
AC006077.2	down-regulated		TNNI3K	down-regulated		CCDC148	down-regulated		GTF2IRD2B	mRNAdown
AC021205.3	down-regulated		AC073569.1	down-regulated		LINC00398	down-regulated		GLT8D1	mRNAdown
AC008669.1	down-regulated		AP000223.1	down-regulated		KIF25	down-regulated		TMPRSS3	mRNAdown
SLC25A27	down-regulated		RBM22P2	down-regulated		ZNF663P	down-regulated		STAT5B	mRNAdown
LINC02600	down-regulated		TPM1-AS	down-regulated		PIK3CD-AS1	down-regulated		TCTEX1D4	mRNAdown
AC114488.1	down-regulated		AC015722.2	down-regulated		AL359092.2	down-regulated		FBXL17	mRNAdown
AC245060.5	down-regulated		AL121723.1	down-regulated		AC006299.1	down-regulated		CRB3	mRNAdown
CASC2	down-regulated		LINC01558	down-regulated		AP001528.1	down-regulated		GAS2	mRNAdown
PSORS1C1	down-regulated		USP50	down-regulated		PGM5-AS1	down-regulated		CASR	mRNAdown
LINC00840	down-regulated		AL139082.1	down-regulated		AL139041.1	down-regulated		CCDC96	mRNAdown
PA2G4P1	down-regulated		RPSAP70	down-regulated		AC004543.1	down-regulated		SPATA6L	mRNAdown
SATB2	down-regulated		AC139491.2	down-regulated		KRT8P5	down-regulated		NUDT13	mRNAdown
AL590096.1	down-regulated		LINC02413	down-regulated		LRRC46	down-regulated		CCDC157	mRNAdown
LRRC26	down-regulated		AL031733.2	down-regulated		LINC02139	down-regulated		C2orf15	mRNAdown
MIR93	down-regulated		EFHD1	down-regulated		BFSP2	down-regulated		PUDP	mRNAdown
VAV3	down-regulated		LINC00323	down-regulated		HTRA4	down-regulated		SLC6A12	mRNAdown
AC253576.2	down-regulated		DBIL5P2	down-regulated		AL603910.1	down-regulated		B3GNTL1	mRNAdown
RN7SL208P	down-regulated		FAM90A2P	down-regulated		FMO3	down-regulated		MICAL1	mRNAdown
MIR3189	down-regulated		HBA1	down-regulated		ARHGAP20	down-regulated		DDO	mRNAdown
CNTNAP3P2	down-regulated		PLA2G2C	down-regulated		TRBV5-5	down-regulated		BTD	mRNAdown
AC008592.4	down-regulated		AC226118.1	down-regulated		LINC00323	down-regulated		PRXL2B	mRNAdown
AC138811.1	down-regulated		TFEC	down-regulated		TRBV12-4	down-regulated		SH3GL2	mRNAdown
AL583810.1	down-regulated		AC092418.2	down-regulated		RDM1P3	down-regulated		SFMBT1	mRNAdown
AC024560.1	down-regulated		AL023583.1	down-regulated		AC113385.3	down-regulated		HLA-C	mRNAdown
NPIPB1P	down-regulated		SLC35F1	down-regulated		GPR85	down-regulated		PLA2G12A	mRNAdown
LINC00562	down-regulated		AC022306.3	down-regulated		AC018647.1	down-regulated		BBIP1	mRNAdown
CASC1	down-regulated		CASC2	down-regulated		PPP1R9A	down-regulated		N4BP2L1	mRNAdown
RNU2-51P	down-regulated		AL133255.1	down-regulated		SUSD2	down-regulated		DENND6B	mRNAdown
AC009690.1	down-regulated		ARHGEF38	down-regulated		CPNE9	down-regulated		FZD4	mRNAdown
AC107952.2	down-regulated		ACE2	down-regulated		AC068769.1	down-regulated		SLC26A7	mRNAdown
AL008635.1	down-regulated		CDH2	down-regulated		AC002451.1	down-regulated		GLP2R	mRNAdown
DOK7	down-regulated		AC016738.1	down-regulated		LINC00922	down-regulated		AP2A2	mRNAdown
AL157904.1	down-regulated		ZNF350-AS1	down-regulated		RSPH1	down-regulated		ZBTB46	mRNAdown
OR7M1P	down-regulated		MDH1B	down-regulated		LINC01082	down-regulated		ZNF214	mRNAdown
AC103760.1	down-regulated		AL135786.2	down-regulated		AL132657.1	down-regulated		RPL14	mRNAdown
AC241585.2	down-regulated		AL513174.1	down-regulated		SUCNR1	down-regulated		CISD3	mRNAdown
AC105020.5	down-regulated		AC126389.1	down-regulated		MDH1B	down-regulated		RNASE4	mRNAdown
AC004943.1	down-regulated		AC103746.1	down-regulated		ZSCAN1	down-regulated		PARD6B	mRNAdown
AL353705.3	down-regulated		AC009549.1	down-regulated		CFL1P3	down-regulated		SLC38A11	mRNAdown
AC010653.1	down-regulated		HFM1	down-regulated		FCGR1A	down-regulated		NDUFA5	mRNAdown
AC022165.1	down-regulated		ZEB2-AS1	down-regulated		UNC5CL	down-regulated		SMAD6	mRNAdown
CDKN2B-AS1	down-regulated		AC019193.2	down-regulated		AC026471.3	down-regulated		YPEL2	mRNAdown
CACNA1D	down-regulated		AC013643.3	down-regulated		E2F3P2	down-regulated		COLQ	mRNAdown
AL109947.1	down-regulated		TSPO2	down-regulated		AC005479.1	down-regulated		NRXN2	mRNAdown
LCN12	down-regulated		SSTR1	down-regulated		RANBP3L	down-regulated		COG7	mRNAdown
SLC22A5	down-regulated		AL592430.2	down-regulated		AL137856.1	down-regulated		KCTD14	mRNAdown
AC021106.2	down-regulated		E2F3P2	down-regulated		SLC35F1	down-regulated		SLC44A4	mRNAdown
AL162311.1	down-regulated		AC133065.2	down-regulated		RPS15AP36	down-regulated		CHPT1	mRNAdown
SPDYE7P	down-regulated		CFAP206	down-regulated		CLEC6A	down-regulated		EPB41L4A	mRNAdown
BMS1P7	down-regulated		AC010200.1	down-regulated		AL035420.3	down-regulated		ZBED3	mRNAdown
AL137847.2	down-regulated		ANKDD1B	down-regulated		KCNK3	down-regulated		TIGD6	mRNAdown
AC018648.1	down-regulated		BNIP3P16	down-regulated		LPAL2	down-regulated		LRTOMT	mRNAdown
AL513174.1	down-regulated		GDF5OS	down-regulated		DDO	down-regulated		COQ7	mRNAdown
TBC1D3B	down-regulated		MMEL1	down-regulated		ASB9P1	down-regulated		CEACAM8	mRNAdown
AC023509.5	down-regulated		MTND5P11	down-regulated		ENO4	down-regulated		FYCO1	mRNAdown
AL353653.1	down-regulated		ZNF763	down-regulated		MT1A	down-regulated		CNTN4	mRNAdown
AC007378.1	down-regulated		AC009159.4	down-regulated		CELF5	down-regulated		DOCK8	mRNAdown
AC013268.1	down-regulated		AP000640.1	down-regulated		AP003557.1	down-regulated		DDAH1	mRNAdown
AC027271.1	down-regulated		AC009088.4	down-regulated		DSCAML1	down-regulated		ACBD5	mRNAdown
ATRIP	down-regulated		AC007378.1	down-regulated		RORB	down-regulated		LRRC75A	mRNAdown
TIMM9P2	down-regulated		NPIPB13	down-regulated		AC005479.2	down-regulated		C9orf50	mRNAdown
ICOSLG	down-regulated		FUT6	down-regulated		CCDC141	down-regulated		PIGV	mRNAdown
AC002451.1	down-regulated		KCNIP3	down-regulated		NPFFR1	down-regulated		IGFBP7	mRNAdown
AC107464.3	down-regulated		PTPRR	down-regulated		DOK5	down-regulated		OVGP1	mRNAdown
AC026367.1	down-regulated		AC005740.1	down-regulated		ROPN1L	down-regulated		UBQLNL	mRNAdown
AC127521.1	down-regulated		PLCE1-AS1	down-regulated		PCDHA8	down-regulated		EMC3	mRNAdown
UBTFL6	down-regulated		AR	down-regulated		AC011899.2	down-regulated		TUSC2	mRNAdown
AC100788.2	down-regulated		ADCY6-DT	down-regulated		AC090844.2	down-regulated		ESRRG	mRNAdown
FHIT	down-regulated		EPB41L4A-DT	down-regulated		FGF14	down-regulated		CDR2	mRNAdown
AL139383.1	down-regulated		AC005082.1	down-regulated		MST1L	down-regulated		ABCB1	mRNAdown
RNU6-833P	down-regulated		ELN-AS1	down-regulated		SHE	down-regulated		TMEM252	mRNAdown
AC004540.1	down-regulated		AL355309.1	down-regulated		TRAV14DV4	down-regulated		FLOT2	mRNAdown
ZRANB2-AS1	down-regulated		RPL34P31	down-regulated		KCNE1	down-regulated		ANKRD42	mRNAdown
AC092902.1	down-regulated		LRRC2-AS1	down-regulated		TRAT1	down-regulated		DPM3	mRNAdown
LINC00939	down-regulated		AL137798.1	down-regulated		GPBAR1	down-regulated		SMPD1	mRNAdown
AC244197.2	down-regulated		LRRK2	down-regulated		VN1R84P	down-regulated		ANKS1B	mRNAdown
ADAM22	down-regulated		NLRP14	down-regulated		AC011481.3	down-regulated		TMEM47	mRNAdown
C1GALT1P1	down-regulated		LGALS2	down-regulated		AC004884.1	down-regulated		FMC1	mRNAdown
AC016026.1	down-regulated		IMPG1	down-regulated		AC013270.1	down-regulated		UBXN10	mRNAdown
AC025871.2	down-regulated		STPG4	down-regulated		TIMM8AP1	down-regulated		SEZ6L2	mRNAdown
AC015908.2	down-regulated		PLD4	down-regulated		FGA	down-regulated		VPS11	mRNAdown
CATIP-AS2	down-regulated		AC006023.3	down-regulated		SLC25A34-AS1	down-regulated		N6AMT1	mRNAdown
UPK3A	down-regulated		AC008040.2	down-regulated		ANTXRLP1	down-regulated		PRR15L	mRNAdown
AL135937.1	down-regulated		TPPP2	down-regulated		AC016590.1	down-regulated		RUNDC3B	mRNAdown
ENPP1	down-regulated		AC104435.2	down-regulated		GGTA1P	down-regulated		IL17RB	mRNAdown
MTCO1P40	down-regulated		KLHL32	down-regulated		TRBV10-3	down-regulated		CDH6	mRNAdown
MAL	down-regulated		AL136980.1	down-regulated		AC006033.1	down-regulated		ANG	mRNAdown
CTBP2P4	down-regulated		MRPS36P1	down-regulated		KRT18P25	down-regulated		SLC6A20	mRNAdown
AC104187.1	down-regulated		MACROD2	down-regulated		AL161785.1	down-regulated		FRMPD2	mRNAdown
AC019077.1	down-regulated		AC009078.3	down-regulated		LINC01426	down-regulated		OMA1	mRNAdown
AC002347.1	down-regulated		RSPH1	down-regulated		AP002505.2	down-regulated		JAZF1	mRNAdown
AP001178.1	down-regulated		AC008669.1	down-regulated		PKD2L1	down-regulated		CCDC30	mRNAdown
TRIM73	down-regulated		TOX3	down-regulated		UNC93B5	down-regulated		TCAIM	mRNAdown
AC010203.2	down-regulated		AC016737.2	down-regulated		RN7SL172P	down-regulated		PRRT3	mRNAdown
PLIN5	down-regulated		AC111170.1	down-regulated		AL009178.2	down-regulated		TXNIP	mRNAdown
AC005014.2	down-regulated		AL607028.1	down-regulated		AC092296.3	down-regulated		TLR3	mRNAdown
AC092162.2	down-regulated		AL121895.1	down-regulated		AC132008.1	down-regulated		KANSL1L	mRNAdown
AL158063.1	down-regulated		SHBG	down-regulated		SLC30A2	down-regulated		SKAP1	mRNAdown
AP003059.2	down-regulated		AC027807.2	down-regulated		PCDHA9	down-regulated		OCIAD2	mRNAdown
NEURL3	down-regulated		AL138759.1	down-regulated		FAM107A	down-regulated		HGD	mRNAdown
FAM90A25P	down-regulated		AL158071.4	down-regulated		CDH6	down-regulated		SNPH	mRNAdown
AMY2B	down-regulated		AL035701.1	down-regulated		EFHC2	down-regulated		NUBP1	mRNAdown
EFHD1	down-regulated		RMST	down-regulated		FBXO15	down-regulated		CKLF	mRNAdown
AC089998.3	down-regulated		AC093151.2	down-regulated		LINC00271	down-regulated		ATAD3C	mRNAdown
AL607028.1	down-regulated		ENO4	down-regulated		RPL31P61	down-regulated		SLC1A1	mRNAdown
ALG1L12P	down-regulated		HPD	down-regulated		CHST4	down-regulated		PAFAH2	mRNAdown
AC127502.1	down-regulated		AC021231.2	down-regulated		MS4A1	down-regulated		GTF2IRD2	mRNAdown
AC022613.3	down-regulated		AC007036.1	down-regulated		GAS2L2	down-regulated		NGLY1	mRNAdown
AC112187.3	down-regulated		AL589739.1	down-regulated		NOSTRIN	down-regulated		MYRFL	mRNAdown
GUSBP11	down-regulated		HOXB-AS3	down-regulated		CXCR2P1	down-regulated		PGAP3	mRNAdown
AC103746.1	down-regulated		RBPMS-AS1	down-regulated		LRRC3B	down-regulated		IQSEC1	mRNAdown
AC093107.2	down-regulated		AC109361.1	down-regulated		RPL18P11	down-regulated		SHISA9	mRNAdown
AF127577.5	down-regulated		AP000866.5	down-regulated		WDR93	down-regulated		SHROOM3	mRNAdown
AL157762.1	down-regulated		UBXN10	down-regulated		DNAJB13	down-regulated		TRIM38	mRNAdown
ATP5MDP1	down-regulated		AGT	down-regulated		GHRL	down-regulated		DZIP3	mRNAdown
SNRK-AS1	down-regulated		AL049629.1	down-regulated		C16orf71	down-regulated		AC013489.1	mRNAdown
AP000640.1	down-regulated		NOL4	down-regulated		PCDHA2	down-regulated		CEP126	mRNAdown
C3orf20	down-regulated		PIP5K1P1	down-regulated		TRAV41	down-regulated		DENND1C	mRNAdown
AC135507.1	down-regulated		AC121338.1	down-regulated		AL512288.1	down-regulated		HAAO	mRNAdown
LINC00574	down-regulated		C21orf62-AS1	down-regulated		AC022098.2	down-regulated		ADPRM	mRNAdown
AC092574.1	down-regulated		AC009961.2	down-regulated		AICDA	down-regulated		ARHGAP6	mRNAdown
SORBS2	down-regulated		P2RY12	down-regulated		AL162724.1	down-regulated		PARP3	mRNAdown
AC133134.1	down-regulated		AC106782.1	down-regulated		AL136366.1	down-regulated		NDUFA3	mRNAdown
C19orf57	down-regulated		AC118755.2	down-regulated		ARSH	down-regulated		HEMK1	mRNAdown
AGAP12P	down-regulated		SUCLA2P1	down-regulated		AC138649.1	down-regulated		CCL15	mRNAdown
ANGPTL8	down-regulated		AC023510.2	down-regulated		AC093158.1	down-regulated		ZNF19	mRNAdown
AL158151.2	down-regulated		AC090627.1	down-regulated		FAXDC2	down-regulated		CRIP3	mRNAdown
FAM27E3	down-regulated		AC073316.2	down-regulated		C4A	down-regulated		COA3	mRNAdown
DYNLL1P2	down-regulated		KRT18P29	down-regulated		AC010175.1	down-regulated		PDHB	mRNAdown
AC079015.1	down-regulated		EFNA2	down-regulated		RPGRIP1	down-regulated		ASB12	mRNAdown
AL022326.2	down-regulated		AL445493.3	down-regulated		CFAP43	down-regulated		NDFIP1	mRNAdown
ZC3H12B	down-regulated		AC007494.2	down-regulated		SYBU	down-regulated		CHCHD4	mRNAdown
HOXC-AS1	down-regulated		AC092574.1	down-regulated		RTN1	down-regulated		CUTA	mRNAdown
AL121895.1	down-regulated		AC243773.2	down-regulated		BIRC7	down-regulated		ZNF816	mRNAdown
AL096803.3	down-regulated		NME9	down-regulated		AC027807.2	down-regulated		SUOX	mRNAdown
AC135983.4	down-regulated		AC005476.1	down-regulated		FGF13-AS1	down-regulated		CRACR2B	mRNAdown
MST1	down-regulated		AC106786.2	down-regulated		KLF15	down-regulated		C11orf54	mRNAdown
GULOP	down-regulated		HNRNPA1P54	down-regulated		CD22	down-regulated		PPIAL4G	mRNAdown
RPL21P40	down-regulated		HOXA9	down-regulated		ALG1L5P	down-regulated		CUBN	mRNAdown
AC021231.3	down-regulated		ZNF541	down-regulated		AC011477.3	down-regulated		POLK	mRNAdown
KRT12	down-regulated		MTCO2P22	down-regulated		PPP1R1B	down-regulated		TMEM139	mRNAdown
HBA1	down-regulated		SCRG1	down-regulated		ABCA4	down-regulated		GDF15	mRNAdown
C1QL1	down-regulated		TTR	down-regulated		KMO	down-regulated		UBB	mRNAdown
ARL14	down-regulated		AC040160.3	down-regulated		GJA5	down-regulated		ARRDC2	mRNAdown
AC011466.4	down-regulated		SLC26A8	down-regulated		NALCN	down-regulated		MINDY1	mRNAdown
AC130324.1	down-regulated		HAMP	down-regulated		PTCHD4	down-regulated		ANKS4B	mRNAdown
HOXA-AS2	down-regulated		AC073534.2	down-regulated		NLRP12	down-regulated		B3GAT1	mRNAdown
AL353622.2	down-regulated		BCAR3-AS1	down-regulated		FTLP5	down-regulated		CCDC153	mRNAdown
AC006557.5	down-regulated		OXER1	down-regulated		DNAAF4	down-regulated		ZMYND15	mRNAdown
AC005696.1	down-regulated		GATA3-AS1	down-regulated		KLRG1	down-regulated		CLN5	mRNAdown
AC011383.1	down-regulated		AC093535.1	down-regulated		AC011511.2	down-regulated		CDKL3	mRNAdown
HOXC9	down-regulated		AC004543.1	down-regulated		AC010547.2	down-regulated		MGAT4B	mRNAdown
AC147651.1	down-regulated		AC147651.1	down-regulated		LINC01091	down-regulated		ALDH2	mRNAdown
C1QTNF4	down-regulated		MT-TE	down-regulated		CPAMD8	down-regulated		RIBC1	mRNAdown
ADORA1	down-regulated		AC010538.1	down-regulated		GRAPL	down-regulated		GJB1	mRNAdown
BEST3	down-regulated		AC021231.3	down-regulated		TRAV5	down-regulated		SCP2	mRNAdown
TLX2	down-regulated		CCDC178	down-regulated		AC093311.1	down-regulated		DAO	mRNAdown
EGFL8	down-regulated		HOXA-AS3	down-regulated		AF186192.1	down-regulated		PEX11G	mRNAdown
AC010997.5	down-regulated		AMY2B	down-regulated		AC002044.2	down-regulated		FUCA2	mRNAdown
AC244034.3	down-regulated		S100A11P2	down-regulated		AC015961.1	down-regulated		BDH2	mRNAdown
AC138207.6	down-regulated		AC116348.3	down-regulated		AC123912.1	down-regulated		SMAD9	mRNAdown
CCDC74B	down-regulated		AC006033.1	down-regulated		SPIC	down-regulated		UQCC1	mRNAdown
SNHG22	down-regulated		AC011899.3	down-regulated		TRGV9	down-regulated		ZBTB18	mRNAdown
AC092809.3	down-regulated		CACNB2	down-regulated		GPR141	down-regulated		ZNF432	mRNAdown
AL022344.1	down-regulated		AC096734.1	down-regulated		AC044840.1	down-regulated		AAMDC	mRNAdown
PDZD9	down-regulated		AC005920.1	down-regulated		CTXND1	down-regulated		TMEM140	mRNAdown
AC091946.2	down-regulated		AL136982.1	down-regulated		CLDN9	down-regulated		USP4	mRNAdown
AC104365.2	down-regulated		HOXC-AS2	down-regulated		AL513217.1	down-regulated		DZANK1	mRNAdown
GATM	down-regulated		AL009181.2	down-regulated		AC099524.1	down-regulated		CAPN6	mRNAdown
AC044802.1	down-regulated		PBLD	down-regulated		SMIM31	down-regulated		RALGPS1	mRNAdown
AL049714.1	down-regulated		SLC25A3P2	down-regulated		TRAV12-1	down-regulated		ALDH6A1	mRNAdown
AC009961.2	down-regulated		KRT18P15	down-regulated		AL109947.1	down-regulated		PHYKPL	mRNAdown
C17orf50	down-regulated		AC005225.2	down-regulated		DRAIC	down-regulated		PDGFD	mRNAdown
AC097724.1	down-regulated		AC011444.2	down-regulated		EDA2R	down-regulated		TMEM82	mRNAdown
CCDC30	down-regulated		AC135507.1	down-regulated		KRT18P15	down-regulated		MAP1LC3B	mRNAdown
GLYCTK	down-regulated		LINC01979	down-regulated		C9orf24	down-regulated		TRAPPC2	mRNAdown
OR6E1P	down-regulated		AC009034.1	down-regulated		AC138207.6	down-regulated		KRT8	mRNAdown
ZNF709	down-regulated		LINC01833	down-regulated		MAG	down-regulated		FHIT	mRNAdown
ATP5PDP2	down-regulated		AC124319.3	down-regulated		TTC25	down-regulated		PPOX	mRNAdown
ZFPM1	down-regulated		FAF1-AS1	down-regulated		AC087071.1	down-regulated		ATG7	mRNAdown
AC004466.2	down-regulated		TAL2	down-regulated		AL137847.1	down-regulated		EFCAB5	mRNAdown
SPART-AS1	down-regulated		AC067904.2	down-regulated		C1QL2	down-regulated		CHN2	mRNAdown
MESP2	down-regulated		LINC01504	down-regulated		RNF157-AS1	down-regulated		HNF4G	mRNAdown
CCDC189	down-regulated		HMCN2	down-regulated		LINC01678	down-regulated		SLC30A7	mRNAdown
HOXD9	down-regulated		FAM71D	down-regulated		FCRL3	down-regulated		TRANK1	mRNAdown
TPSP2	down-regulated		AP003059.2	down-regulated		RPS11P7	down-regulated		C10orf143	mRNAdown
AC007613.1	down-regulated		LSMEM2	down-regulated		PLEKHA3P1	down-regulated		CRAT	mRNAdown
DRICH1	down-regulated		LINC00475	down-regulated		LY86	down-regulated		BLOC1S5	mRNAdown
PPIAP8	down-regulated		ZNF33BP1	down-regulated		CNTN4	down-regulated		PIGK	mRNAdown
GUSBP9	down-regulated		AL161725.2	down-regulated		PCP4	down-regulated		EEF1AKMT1	mRNAdown
ZNF214	down-regulated		RPSAP2	down-regulated		RPL5P28	down-regulated		LINC00672	mRNAdown
AP001269.1	down-regulated		AC004233.1	down-regulated		AL391845.2	down-regulated		ALKBH7	mRNAdown
RN7SL388P	down-regulated		AC016705.2	down-regulated		ZNF350-AS1	down-regulated		B9D2	mRNAdown
PEBP1P2	down-regulated		HCG14	down-regulated		GSTM5	down-regulated		POLR2M	mRNAdown
AC079416.3	down-regulated		AC004870.2	down-regulated		PTGES3P2	down-regulated		LIX1L	mRNAdown
NPIPB2	down-regulated		SPART-AS1	down-regulated		PIGR	down-regulated		MYOCD	mRNAdown
AL031848.1	down-regulated		MS4A4E	down-regulated		KLHL10	down-regulated		GHDC	mRNAdown
AC004908.3	down-regulated		AC004233.2	down-regulated		TRPC6	down-regulated		PARP8	mRNAdown
AL353801.3	down-regulated		SEC16B	down-regulated		PACRG	down-regulated		FN3K	mRNAdown
TMEM229B	down-regulated		ZMAT1	down-regulated		AC005740.1	down-regulated		IHH	mRNAdown
AC005753.1	down-regulated		AC007938.1	down-regulated		HLA-DPB2	down-regulated		ZNF563	mRNAdown
KRT18P1	down-regulated		AL590096.1	down-regulated		ALKAL2	down-regulated		ZNF44	mRNAdown
MIR99AHG	down-regulated		WDR78	down-regulated		AC007684.1	down-regulated		ZNF555	mRNAdown
C17orf97	down-regulated		AC006994.1	down-regulated		PLEKHS1	down-regulated		NEK5	mRNAdown
AC024884.2	down-regulated		MTATP8P1	down-regulated		HNMT	down-regulated		ZNF717	mRNAdown
PDPK2P	down-regulated		AF287957.1	down-regulated		ZNF135	down-regulated		KIF12	mRNAdown
ANK1	down-regulated		CFAP70	down-regulated		RPL13AP19	down-regulated		ARHGAP1	mRNAdown
Z69666.1	down-regulated		BDH2P1	down-regulated		KRT18P57	down-regulated		MINDY4	mRNAdown
UQCRFS1P1	down-regulated		LINC02166	down-regulated		HSPA8P4	down-regulated		SLC39A13	mRNAdown
AC089999.1	down-regulated		AL133410.1	down-regulated		AF186192.2	down-regulated		ARL6IP5	mRNAdown
AC092683.1	down-regulated		AC105137.1	down-regulated		KBTBD11	down-regulated		SYTL2	mRNAdown
AC131212.4	down-regulated		AC093726.2	down-regulated		U47924.3	down-regulated		KCNJ3	mRNAdown
EFCAB5	down-regulated		SKAP1-AS1	down-regulated		VTI1BP1	down-regulated		KRT18	mRNAdown
AC027807.2	down-regulated		CD24P4	down-regulated		TTBK1	down-regulated		MACC1	mRNAdown
AC112491.1	down-regulated		AL591178.1	down-regulated		HHIP-AS1	down-regulated		ARPC4	mRNAdown
IGSF5	down-regulated		TMEM72-AS1	down-regulated		ZNF90	down-regulated		TNFRSF14	mRNAdown
BEND7	down-regulated		AC008770.2	down-regulated		AC104964.3	down-regulated		SMIM6	mRNAdown
CPNE9	down-regulated		RGL3	down-regulated		AC003035.1	down-regulated		ZFP2	mRNAdown
AP001412.1	down-regulated		PPIL6	down-regulated		LINC00628	down-regulated		NSMCE1	mRNAdown
AL591806.3	down-regulated		AL133297.2	down-regulated		CYP1B1-AS1	down-regulated		TST	mRNAdown
AL033527.3	down-regulated		AL591806.3	down-regulated		TRAV27	down-regulated		PCBD1	mRNAdown
AC023794.2	down-regulated		OLA1P3	down-regulated		RAB17	down-regulated		KANK2	mRNAdown
AMACR	down-regulated		AC124312.2	down-regulated		FAM47E	down-regulated		RPS27L	mRNAdown
AL390208.1	down-regulated		AC008770.1	down-regulated		OGN	down-regulated		CASP9	mRNAdown
POM121L4P	down-regulated		THRSP	down-regulated		AL049874.2	down-regulated		FAM78B	mRNAdown
HMGN2P6	down-regulated		ADAM22	down-regulated		LINC01767	down-regulated		PPIC	mRNAdown
AL591866.1	down-regulated		MNX1-AS2	down-regulated		MIR5195	down-regulated		ACP6	mRNAdown
MITF	down-regulated		AL137847.1	down-regulated		COL4A4	down-regulated		SOWAHA	mRNAdown
AC005674.1	down-regulated		AC093001.1	down-regulated		RPL32P1	down-regulated		FAM104B	mRNAdown
SUGT1P2	down-regulated		VSTM1	down-regulated		AC026748.1	down-regulated		ZNF620	mRNAdown
AC027682.5	down-regulated		C3orf20	down-regulated		AC145285.1	down-regulated		VRK3	mRNAdown
MKRN2OS	down-regulated		AC011346.1	down-regulated		ADAMTS7P4	down-regulated		TMEM192	mRNAdown
AGT	down-regulated		AC068234.3	down-regulated		P2RY13	down-regulated		CCDC159	mRNAdown
PSD2	down-regulated		A2MP1	down-regulated		AC129492.4	down-regulated		AC104532.1	mRNAdown
AL513477.2	down-regulated		CCDC40	down-regulated		BCL2L14	down-regulated		AKR1A1	mRNAdown
AC098848.1	down-regulated		RPL36AP21	down-regulated		ARHGAP44	down-regulated		ANKMY2	mRNAdown
AC104837.2	down-regulated		AC097359.1	down-regulated		AC087477.2	down-regulated		DHX58	mRNAdown
KRT18P10	down-regulated		TMEM130	down-regulated		GAS2	down-regulated		HIGD2A	mRNAdown
PBLD	down-regulated		AC097505.1	down-regulated		AL365361.1	down-regulated		AMOT	mRNAdown
PLEKHA6	down-regulated		AC011446.1	down-regulated		RPL31P11	down-regulated		MIEN1	mRNAdown
AC024619.4	down-regulated		ATP5PBP5	down-regulated		HCG14	down-regulated		BHLHE41	mRNAdown
AL136115.1	down-regulated		CFAP69	down-regulated		AC105389.2	down-regulated		ZC3H12B	mRNAdown
LINC01762	down-regulated		DPY19L2	down-regulated		GAPDHP37	down-regulated		KAT2B	mRNAdown
AC244093.3	down-regulated		RHOXF1	down-regulated		PHACTR1	down-regulated		GPR108	mRNAdown
HOXA10	down-regulated		AC104187.1	down-regulated		AC092634.3	down-regulated		TMEM63A	mRNAdown
IGBP1-AS2	down-regulated		S100A1	down-regulated		AL512306.3	down-regulated		CCDC13	mRNAdown
AL022069.2	down-regulated		NOSTRIN	down-regulated		LINC02416	down-regulated		IQGAP2	mRNAdown
KRT8P40	down-regulated		AC124947.2	down-regulated		GPR25	down-regulated		ACTR3C	mRNAdown
AL109945.1	down-regulated		AL049714.1	down-regulated		LINC01638	down-regulated		C17orf97	mRNAdown
MIR6812	down-regulated		MTND6P4	down-regulated		TMEM229A	down-regulated		SMDT1	mRNAdown
FAM47E-STBD1	down-regulated		AC139099.1	down-regulated		CADM3-AS1	down-regulated		GNAI2	mRNAdown
AC107021.2	down-regulated		RAB5CP2	down-regulated		RRM2P3	down-regulated		AKAP7	mRNAdown
SEMA3B	down-regulated		PTTG2	down-regulated		FXYD4	down-regulated		ACYP2	mRNAdown
AC024270.1	down-regulated		AC091132.3	down-regulated		SLC8A1	down-regulated		CLDN4	mRNAdown
WDR93	down-regulated		AL353678.1	down-regulated		DNAAF1	down-regulated		SLC22A18	mRNAdown
COX6A2	down-regulated		AL161669.3	down-regulated		AC002525.1	down-regulated		DNAJC22	mRNAdown
AC011498.4	down-regulated		AC092296.2	down-regulated		AC120349.3	down-regulated		ZCWPW1	mRNAdown
AC105020.6	down-regulated		AL354707.2	down-regulated		RPL23AP32	down-regulated		POU1F1	mRNAdown
RPL6P2	down-regulated		FAM81A	down-regulated		ZMYM4-AS1	down-regulated		GEMIN8	mRNAdown
AC008758.4	down-regulated		AICDA	down-regulated		SHROOM4	down-regulated		MGST3	mRNAdown
KRT18P65	down-regulated		CRYZL2P-SEC16B	down-regulated		VPREB3	down-regulated		LMBRD1	mRNAdown
ANKRD33B	down-regulated		ASXL3	down-regulated		FAM238A	down-regulated		MXD4	mRNAdown
AL645939.3	down-regulated		BTF3P10	down-regulated		AC005332.2	down-regulated		SCIN	mRNAdown
CDC42-IT1	down-regulated		RRS1-AS1	down-regulated		AC003991.2	down-regulated		FAM86B1	mRNAdown
AL662884.1	down-regulated		LINC01374	down-regulated		KLHL4	down-regulated		ZNHIT1	mRNAdown
SZT2-AS1	down-regulated		AP001630.1	down-regulated		Z84723.1	down-regulated		EFHD1	mRNAdown
HIGD1AP1	down-regulated		RAB17	down-regulated		PDE4C	down-regulated		ELF3	mRNAdown
RN7SL477P	down-regulated		RPL15P18	down-regulated		RAB37	down-regulated		AGPAT3	mRNAdown
RPSAP21	down-regulated		LINC01197	down-regulated		TOGARAM2	down-regulated		CCDC122	mRNAdown
RPL26P37	down-regulated		AC010653.1	down-regulated		RPSAP49	down-regulated		TMEM217	mRNAdown
AC009948.4	down-regulated		LINC02712	down-regulated		ITGA8	down-regulated		RAB11FIP2	mRNAdown
RPL12P25	down-regulated		ACTG1P10	down-regulated		HIGD1B	down-regulated		MRPL54	mRNAdown
SKOR1	down-regulated		ESPNP	down-regulated		CEACAM4	down-regulated		C4A	mRNAdown
RAET1E-AS1	down-regulated		ZNF702P	down-regulated		AC095031.1	down-regulated		CFAP99	mRNAdown
AC136475.5	down-regulated		AC004223.1	down-regulated		IL2	down-regulated		C15orf65	mRNAdown
SNRPGP5	down-regulated		AC068533.3	down-regulated		AGBL4	down-regulated		STBD1	mRNAdown
AC135352.1	down-regulated		AC092802.2	down-regulated		LINC00578	down-regulated		ZNF441	mRNAdown
AL592114.3	down-regulated		AC008915.2	down-regulated		CLNK	down-regulated		EPB41L1	mRNAdown
AC090281.1	down-regulated		HHATL-AS1	down-regulated		AC127521.1	down-regulated		METTL15	mRNAdown
AL645568.3	down-regulated		AP003059.1	down-regulated		LINC01664	down-regulated		ZCCHC18	mRNAdown
AC138466.1	down-regulated		OR7E29P	down-regulated		FMN1	down-regulated		TADA3	mRNAdown
SLC25A34	down-regulated		HOXB9	down-regulated		ZNF442	down-regulated		RALGAPA2	mRNAdown
MYLK4	down-regulated		RPL21P44	down-regulated		ENPP5	down-regulated		NME6	mRNAdown
AC027020.1	down-regulated		AC092436.3	down-regulated		AC006566.1	down-regulated		AKTIP	mRNAdown
SERPINC1	down-regulated		PACRG	down-regulated		EPHA3	down-regulated		CLDN23	mRNAdown
LGALS2	down-regulated		BEAN1-AS1	down-regulated		TRAV2	down-regulated		GMIP	mRNAdown
AL354809.1	down-regulated		AP001527.1	down-regulated		C1QTNF9	down-regulated		RGL3	mRNAdown
HNRNPA1P57	down-regulated		AL137247.1	down-regulated		PPBP	down-regulated		ASPA	mRNAdown
AC124319.3	down-regulated		C11orf52	down-regulated		NCMAP	down-regulated		MAGIX	mRNAdown
EDAR	down-regulated		AC044840.1	down-regulated		RN7SL526P	down-regulated		LMO2	mRNAdown
AC023509.1	down-regulated		AC099791.2	down-regulated		BNC2-AS1	down-regulated		DISP1	mRNAdown
ACE2	down-regulated		AL449106.1	down-regulated		AC093010.2	down-regulated		TTBK1	mRNAdown
AC022893.1	down-regulated		SOCS5P2	down-regulated		EMCN	down-regulated		AK9	mRNAdown
NPIPB13	down-regulated		AL354809.1	down-regulated		ADRB1	down-regulated		SPATA6	mRNAdown
AC022509.3	down-regulated		CYP7A1	down-regulated		ZNF727	down-regulated		ZC2HC1C	mRNAdown
ASB9P1	down-regulated		PTGES3P2	down-regulated		OMP	down-regulated		NICN1	mRNAdown
HNRNPA1P54	down-regulated		SLC14A1	down-regulated		AC084082.1	down-regulated		GPR45	mRNAdown
UNC93B4	down-regulated		AL391094.1	down-regulated		RNU7-45P	down-regulated		TSPAN33	mRNAdown
LINC00887	down-regulated		AC004540.2	down-regulated		FRZB	down-regulated		GALM	mRNAdown
BX255925.1	down-regulated		AP006621.1	down-regulated		GUCY1B2	down-regulated		MTIF3	mRNAdown
AL390879.1	down-regulated		GAPT	down-regulated		OCM	down-regulated		CYB5D2	mRNAdown
AC004233.1	down-regulated		AC104316.1	down-regulated		FAM225B	down-regulated		C1orf210	mRNAdown
MUC19	down-regulated		KEL	down-regulated		AL353693.1	down-regulated		SLC5A9	mRNAdown
MIRLET7BHG	down-regulated		AC015813.4	down-regulated		TMC5	down-regulated		MAT2B	mRNAdown
AC025171.4	down-regulated		REPS2	down-regulated		GOLT1A	down-regulated		MTMR10	mRNAdown
AP001527.1	down-regulated		Z73965.1	down-regulated		AC010240.3	down-regulated		SEMA3B	mRNAdown
SLC15A1	down-regulated		AP001625.2	down-regulated		LINC01480	down-regulated		ANKRD24	mRNAdown
AC008915.2	down-regulated		AC104561.3	down-regulated		ERICH2	down-regulated		CXXC5	mRNAdown
AMIGO3	down-regulated		MITF	down-regulated		MSX2P1	down-regulated		RBPMS2	mRNAdown
AL354919.1	down-regulated		PM20D1	down-regulated		ZNF491	down-regulated		LHPP	mRNAdown
RN7SKP70	down-regulated		TCTEX1D4	down-regulated		ATP5MFP4	down-regulated		CHKA	mRNAdown
AP003057.1	down-regulated		MTRNR2L8	down-regulated		TMPRSS7	down-regulated		FUZ	mRNAdown
PFN1P2	down-regulated		AL139246.2	down-regulated		PCDHA6	down-regulated		MKRN2	mRNAdown
AC093797.1	down-regulated		LINC01962	down-regulated		ANO3	down-regulated		CCDC200	mRNAdown
AL139300.2	down-regulated		RNASE4	down-regulated		OSTN-AS1	down-regulated		TRAPPC13	mRNAdown
PLK5	down-regulated		LINC02829	down-regulated		HPGDS	down-regulated		BLOC1S1	mRNAdown
TAS2R10	down-regulated		AP000346.4	down-regulated		SPATA9	down-regulated		STX3	mRNAdown
AC027682.4	down-regulated		SPTLC3	down-regulated		TRAV1-2	down-regulated		SELENOK	mRNAdown
RNA5SP311	down-regulated		FAM215A	down-regulated		SUSD5	down-regulated		SMIM4	mRNAdown
AC006357.1	down-regulated		SPDYE2B	down-regulated		CHRM2	down-regulated		UROD	mRNAdown
NLRP14	down-regulated		ZBTB20-AS4	down-regulated		SAMD3	down-regulated		AGBL3	mRNAdown
AC012618.3	down-regulated		NFIA-AS1	down-regulated		DPP4	down-regulated		RBCK1	mRNAdown
AC087742.1	down-regulated		OR6E1P	down-regulated		SLC4A10	down-regulated		CABP4	mRNAdown
AC239803.1	down-regulated		NMBR	down-regulated		PCDHB4	down-regulated		SLC28A2	mRNAdown
AC009949.1	down-regulated		HOXD3	down-regulated		CD302	down-regulated		CYP20A1	mRNAdown
AC023510.2	down-regulated		AC090197.1	down-regulated		AC092809.3	down-regulated		SORBS1	mRNAdown
NRIR	down-regulated		AC010598.1	down-regulated		AL358232.1	down-regulated		PCSK4	mRNAdown
AC009148.1	down-regulated		HOXC4	down-regulated		SIGLEC22P	down-regulated		GSTK1	mRNAdown
AL133352.1	down-regulated		AC012618.3	down-regulated		CSDC2	down-regulated		REEP5	mRNAdown
AC009159.3	down-regulated		LRRIQ4	down-regulated		CD300LF	down-regulated		ZNF844	mRNAdown
AC004846.2	down-regulated		AL391840.2	down-regulated		TMEM233	down-regulated		HINT2	mRNAdown
RPL36AP21	down-regulated		AC020910.7	down-regulated		AC009501.1	down-regulated		ZNF302	mRNAdown
GAS8-AS1	down-regulated		TMEM132C	down-regulated		BANK1	down-regulated		mRNAupK3A	mRNAdown
AKAP5	down-regulated		AL365181.2	down-regulated		ECEL1P2	down-regulated		GNAQ	mRNAdown
AC026367.3	down-regulated		LRRC6	down-regulated		ZNF69	down-regulated		MMAA	mRNAdown
PPIAP90	down-regulated		SNHG22	down-regulated		ADGRF5	down-regulated		CCNG1	mRNAdown
AC099340.1	down-regulated		ITGB3	down-regulated		TRBV5-6	down-regulated		BCL2L1	mRNAdown
AL354707.2	down-regulated		SYTL2	down-regulated		SULT1A1	down-regulated		CRYZ	mRNAdown
RNVU1-4	down-regulated		AL158063.1	down-regulated		SLC26A4-AS1	down-regulated		PROM1	mRNAdown
AACSP1	down-regulated		FP671120.8	down-regulated		AC093510.2	down-regulated		CFAP410	mRNAdown
AC068790.4	down-regulated		C11orf42	down-regulated		KRT18P1	down-regulated		MGAT4A	mRNAdown
SEMA6A-AS1	down-regulated		AL031663.3	down-regulated		LILRA4	down-regulated		CCNH	mRNAdown
GFAP	down-regulated		DNAAF4	down-regulated		LRRC6	down-regulated		CTDSPL	mRNAdown
AC005840.4	down-regulated		AC022148.2	down-regulated		TRBV3-1	down-regulated		THUMPD1	mRNAdown
PRRT1	down-regulated		AC063947.2	down-regulated		LILRA1	down-regulated		CLYBL	mRNAdown
LINC02004	down-regulated		AL133415.1	down-regulated		HRCT1	down-regulated		PCCA	mRNAdown
AL157756.1	down-regulated		AC098820.4	down-regulated		CCDC30	down-regulated		ZSWIM7	mRNAdown
OR2A9P	down-regulated		AC106800.1	down-regulated		AL158071.3	down-regulated		AKAP5	mRNAdown
AC034111.1	down-regulated		WNK4	down-regulated		AC002044.1	down-regulated		CREBRF	mRNAdown
AL022345.1	down-regulated		AC013549.1	down-regulated		CRTAM	down-regulated		PLLP	mRNAdown
AC136469.2	down-regulated		AC097713.2	down-regulated		AL591623.1	down-regulated		TMEM219	mRNAdown
DEGS2	down-regulated		AC120498.4	down-regulated		LINC01852	down-regulated		ETFBKMT	mRNAdown
AC099329.2	down-regulated		AC010615.1	down-regulated		TPRG1LP1	down-regulated		RNASET2	mRNAdown
KRT18P33	down-regulated		PPP1R8P1	down-regulated		COL6A4P2	down-regulated		MYRIP	mRNAdown
AC008770.2	down-regulated		SCIN	down-regulated		AC107027.1	down-regulated		FAM221A	mRNAdown
AF064860.2	down-regulated		FAM166C	down-regulated		NXPE4	down-regulated		IDUA	mRNAdown
AC006378.1	down-regulated		MIR6859-1	down-regulated		AL450124.1	down-regulated		UNC93B1	mRNAdown
HOXD8	down-regulated		AP003393.1	down-regulated		FBXL13	down-regulated		ZNF888	mRNAdown
AC055764.2	down-regulated		AC010761.6	down-regulated		KIAA0825	down-regulated		TCEA3	mRNAdown
SEMA3B-AS1	down-regulated		AL035448.1	down-regulated		AP001627.1	down-regulated		SPATA13	mRNAdown
AC012441.2	down-regulated		AC091132.5	down-regulated		AC093840.1	down-regulated		DUSP15	mRNAdown
AC010598.1	down-regulated		AC006378.1	down-regulated		AC005225.2	down-regulated		SEMA5A	mRNAdown
THRB-AS1	down-regulated		AC011239.2	down-regulated		ARMC3	down-regulated		CCDC198	mRNAdown
Z97989.1	down-regulated		VTN	down-regulated		AC104653.1	down-regulated		KCNK5	mRNAdown
FMR1-AS1	down-regulated		UPF3AP1	down-regulated		FCRL6	down-regulated		TTPA	mRNAdown
AC092681.3	down-regulated		PCSK1N	down-regulated		TRBV6-6	down-regulated		PRR26	mRNAdown
MTATP8P2	down-regulated		RNU6-833P	down-regulated		KIF12	down-regulated		GPA33	mRNAdown
MIR4728	down-regulated		ATP6V0E2-AS1	down-regulated		AL357055.1	down-regulated		ARL17A	mRNAdown
KRTAP2-3	down-regulated		RNY1P16	down-regulated		AL360014.1	down-regulated		PSMB10	mRNAdown
GPX1P1	down-regulated		AL079342.3	down-regulated		MYH11	down-regulated		GABARAPL2	mRNAdown
AC063950.1	down-regulated		AC018521.7	down-regulated		GLRXP3	down-regulated		DNAAF4	mRNAdown
SYTL2	down-regulated		LINC01836	down-regulated		AP001626.1	down-regulated		ZNF33A	mRNAdown
AL662890.1	down-regulated		KRT18P33	down-regulated		ZNF625-ZNF20	down-regulated		CCDC71	mRNAdown
LINC01315	down-regulated		BNIP3P26	down-regulated		FMO2	down-regulated		RASSF6	mRNAdown
ATP6V0E2-AS1	down-regulated		GPBAR1	down-regulated		MIR646HG	down-regulated		TTC1	mRNAdown
AC004381.1	down-regulated		RLN2	down-regulated		TVP23A	down-regulated		CLN3	mRNAdown
PPIAL4G	down-regulated		SLC26A7	down-regulated		ANKRD55	down-regulated		BCKDHB	mRNAdown
AC034236.3	down-regulated		C17orf97	down-regulated		AC243960.3	down-regulated		HBA1	mRNAdown
NPB	down-regulated		AC006116.2	down-regulated		BEAN1-AS1	down-regulated		ECHS1	mRNAdown
MIR339	down-regulated		KRT18P65	down-regulated		DCSTAMP	down-regulated		NHLRC3	mRNAdown
FAM151A	down-regulated		AC112191.2	down-regulated		NAIP	down-regulated		LRRC6	mRNAdown
AC104785.1	down-regulated		AC003991.2	down-regulated		WIF1	down-regulated		TMX4	mRNAdown
CD70	down-regulated		AL353151.1	down-regulated		MAGI2-AS3	down-regulated		LRMDA	mRNAdown
HOXC11	down-regulated		PIGR	down-regulated		C17orf50	down-regulated		ACTR8	mRNAdown
B3GAT1	down-regulated		IL4	down-regulated		ARHGAP15	down-regulated		ACSM3	mRNAdown
AC092111.2	down-regulated		ZC3H12B	down-regulated		FAM166B	down-regulated		CDK20	mRNAdown
AL135744.1	down-regulated		FMO5	down-regulated		CD80	down-regulated		C1QTNF3	mRNAdown
PRR7-AS1	down-regulated		ZNF214	down-regulated		RPL10P14	down-regulated		DNAJC15	mRNAdown
TRAPPC5	down-regulated		LINC02334	down-regulated		AC015813.4	down-regulated		BORCS7	mRNAdown
SLC35F4	down-regulated		CTAGE4	down-regulated		AL603839.4	down-regulated		MFSD8	mRNAdown
AL390039.1	down-regulated		AL162727.1	down-regulated		FOLR2	down-regulated		KIAA1211L	mRNAdown
SPTBN5	down-regulated		SDR42E2	down-regulated		MS4A4E	down-regulated		N4BP2L2	mRNAdown
RPL21P18	down-regulated		CCDC26	down-regulated		AC112191.2	down-regulated		SHBG	mRNAdown
AL365356.1	down-regulated		RPL34P33	down-regulated		SMIM2-AS1	down-regulated		TOX3	mRNAdown
AL049795.1	down-regulated		RPL10P2	down-regulated		AC004540.1	down-regulated		COG1	mRNAdown
AL591848.4	down-regulated		AP000345.2	down-regulated		AC020604.1	down-regulated		AQP2	mRNAdown
MISP3	down-regulated		RNF182	down-regulated		TRBV5-1	down-regulated		CEP120	mRNAdown
CLYBL	down-regulated		AC010680.1	down-regulated		GUCY1A2	down-regulated		PAQR8	mRNAdown
AC005041.3	down-regulated		AGBL3	down-regulated		AC078899.1	down-regulated		NUDT12	mRNAdown
AL162615.1	down-regulated		NR3C2	down-regulated		AGER	down-regulated		ABHD12	mRNAdown
NFIA-AS1	down-regulated		MFAP3L	down-regulated		LRRIQ1	down-regulated		CIITA	mRNAdown
AC007255.1	down-regulated		AC009131.1	down-regulated		LINC02371	down-regulated		ZBTB20	mRNAdown
AL512506.3	down-regulated		AL356124.1	down-regulated		RPL12P41	down-regulated		LZTFL1	mRNAdown
AC079594.2	down-regulated		FAM124A	down-regulated		NEK10	down-regulated		XPC	mRNAdown
ETF1P1	down-regulated		AC022509.4	down-regulated		AC090559.1	down-regulated		PBLD	mRNAdown
AC069234.4	down-regulated		AC092720.1	down-regulated		GPR65	down-regulated		LCA5L	mRNAdown
BX322562.1	down-regulated		IGFBP7-AS1	down-regulated		MAATS1	down-regulated		SORBS2	mRNAdown
IL17RD	down-regulated		SLC35F4	down-regulated		LINC02447	down-regulated		CYP4A22	mRNAdown
AC087500.2	down-regulated		ZNF486	down-regulated		GPAT2	down-regulated		JADE1	mRNAdown
ASB12	down-regulated		CDKL2	down-regulated		AC104532.1	down-regulated		TJP3	mRNAdown
TAS2R4	down-regulated		CFAP44-AS1	down-regulated		ZNF582-AS1	down-regulated		ZNF709	mRNAdown
AC112184.1	down-regulated		AC113385.3	down-regulated		TCTEX1D4	down-regulated		mRNAupP2	mRNAdown
AL022316.1	down-regulated		AC099518.2	down-regulated		TRAV13-2	down-regulated		NDUFA13	mRNAdown
AL928970.1	down-regulated		AC009806.1	down-regulated		IMPG1	down-regulated		CD151	mRNAdown
AC011491.2	down-regulated		AP003717.1	down-regulated		SHISAL2A	down-regulated		TOMM20L	mRNAdown
AL845552.1	down-regulated		SRRM1P3	down-regulated		GIMAP5	down-regulated		KLF2	mRNAdown
MYH7B	down-regulated		ZNF90	down-regulated		AL109659.3	down-regulated		MPC2	mRNAdown
AL161729.3	down-regulated		SUGT1P2	down-regulated		AC209007.1	down-regulated		RAB20	mRNAdown
AC090515.3	down-regulated		AC022762.2	down-regulated		ACSL6	down-regulated		ISCU	mRNAdown
NDUFB1P1	down-regulated		RPL10P5	down-regulated		ZNF583	down-regulated		NAA60	mRNAdown
ZNF252P-AS1	down-regulated		KRT7-AS	down-regulated		DOK6	down-regulated		SUMF1	mRNAdown
LINC00323	down-regulated		ZDHHC15	down-regulated		MS4A4A	down-regulated		PARP4	mRNAdown
LINC02373	down-regulated		SLC1A1	down-regulated		FRGCA	down-regulated		ADD1	mRNAdown
AC004449.1	down-regulated		AP003419.2	down-regulated		AC124242.2	down-regulated		PARD6A	mRNAdown
FAM124A	down-regulated		ADD3-AS1	down-regulated		REELD1	down-regulated		ZFHX2	mRNAdown
AC084125.4	down-regulated		ATP5MDP1	down-regulated		RPL23AP49	down-regulated		DNAJC4	mRNAdown
MGARP	down-regulated		AC026367.2	down-regulated		ATP8A1	down-regulated		SLC37A1	mRNAdown
AL359715.1	down-regulated		RPS26P47	down-regulated		ZNF665	down-regulated		SPTLC3	mRNAdown
RNFT1-DT	down-regulated		LAMA5-AS1	down-regulated		AC104590.1	down-regulated		PHYH	mRNAdown
AC002044.1	down-regulated		FOXP1-AS1	down-regulated		TNRC18P3	down-regulated		DTWD2	mRNAdown
AL136310.1	down-regulated		AC107952.2	down-regulated		LRRC63	down-regulated		ALPK1	mRNAdown
CFAP70	down-regulated		ART4	down-regulated		CFAP57	down-regulated		GPD1L	mRNAdown
AL157392.4	down-regulated		COBL	down-regulated		SYNE1	down-regulated		TMEM205	mRNAdown
AC073263.1	down-regulated		AC004594.1	down-regulated		AC018523.1	down-regulated		ZNF611	mRNAdown
AL109983.1	down-regulated		COL9A1	down-regulated		AF111167.2	down-regulated		CFAP70	mRNAdown
Z84492.1	down-regulated		TERB1	down-regulated		HCG9	down-regulated		ABCD3	mRNAdown
HOXC6	down-regulated		AP000424.2	down-regulated		TRBV4-2	down-regulated		FIG4	mRNAdown
AC096720.2	down-regulated		CALR4P	down-regulated		FILIP1	down-regulated		DRC3	mRNAdown
RPL36AP39	down-regulated		AC004948.1	down-regulated		AL354872.2	down-regulated		DNAH7	mRNAdown
RPS15AP17	down-regulated		NANOGP1	down-regulated		MS4A14	down-regulated		BBS9	mRNAdown
AL390719.2	down-regulated		ZNF382	down-regulated		AC006042.3	down-regulated		SLC44A3	mRNAdown
AC009806.1	down-regulated		AL031133.1	down-regulated		BCO1	down-regulated		SDSL	mRNAdown
LINC01836	down-regulated		PEBP1P2	down-regulated		LINC00365	down-regulated		SCAMP4	mRNAdown
MTNR1A	down-regulated		CSNK1G2P1	down-regulated		DNAH5	down-regulated		DHH	mRNAdown
LINC01389	down-regulated		AC107464.3	down-regulated		RCAN2	down-regulated		OCLN	mRNAdown
LINC01559	down-regulated		OR7E14P	down-regulated		AC244517.2	down-regulated		NAGLU	mRNAdown
AC087683.1	down-regulated		PRR15L	down-regulated		AC092431.1	down-regulated		TDRD3	mRNAdown
SKIDA1	down-regulated		AC129492.4	down-regulated		ADORA1	down-regulated		DHRS12	mRNAdown
AC013400.1	down-regulated		AC009974.1	down-regulated		KRT18P28	down-regulated		MSRB2	mRNAdown
DBIL5P2	down-regulated		ATP5MC2P1	down-regulated		CRISP2	down-regulated		ZNF763	mRNAdown
AC092535.4	down-regulated		ATP6V1FNB	down-regulated		MMP8	down-regulated		RPL15	mRNAdown
AC115284.2	down-regulated		TEX38	down-regulated		EFCAB6	down-regulated		TRAK2	mRNAdown
SPATA18	down-regulated		TTC25	down-regulated		AC008972.2	down-regulated		OSBPL7	mRNAdown
FRG1KP	down-regulated		OSBPL10-AS1	down-regulated		MARCO	down-regulated		TTLL9	mRNAdown
AL732314.6	down-regulated		MMP2-AS1	down-regulated		PSMG3-AS1	down-regulated		PFDN1	mRNAdown
PPP1R36	down-regulated		AC073534.1	down-regulated		ZNF382	down-regulated		MYOC	mRNAdown
AC068722.2	down-regulated		AC090181.3	down-regulated		CSF3R	down-regulated		ZNF433	mRNAdown
NPIPB10P	down-regulated		DPF3	down-regulated		TNFSF15	down-regulated		CRELD1	mRNAdown
AC012213.2	down-regulated		HOXA10-AS	down-regulated		IPCEF1	down-regulated		IFT88	mRNAdown
AL645940.1	down-regulated		ZNF540	down-regulated		AL590764.1	down-regulated		HHLA3	mRNAdown
AC245884.10	down-regulated		HAAO	down-regulated		MS4A2	down-regulated		ID2	mRNAdown
HUNK	down-regulated		AC025423.1	down-regulated		ANKRD7	down-regulated		CACNB2	mRNAdown
FAM86B2	down-regulated		AC022395.1	down-regulated		ERP27	down-regulated		STXBP4	mRNAdown
FAM170A	down-regulated		AC092111.1	down-regulated		HMGB2P1	down-regulated		C11orf74	mRNAdown
TAS2R3	down-regulated		KCP	down-regulated		MYRIP	down-regulated		TMEM243	mRNAdown
MIR429	down-regulated		MIR3936HG	down-regulated		CD84	down-regulated		ILDR2	mRNAdown
AC021739.3	down-regulated		AC120349.3	down-regulated		AC106786.2	down-regulated		DIO1	mRNAdown
AC004543.1	down-regulated		APOC1P1	down-regulated		LRRIQ4	down-regulated		LIPC	mRNAdown
AC118754.2	down-regulated		AL356317.1	down-regulated		AC093890.1	down-regulated		CRYL1	mRNAdown
MAMDC4	down-regulated		CCL16	down-regulated		WNT9B	down-regulated		SH3BGR	mRNAdown
AC127024.6	down-regulated		LINC02235	down-regulated		HIGD2B	down-regulated		SLC27A2	mRNAdown
LINC02166	down-regulated		PARD3B	down-regulated		DDIT4L	down-regulated		LRRC27	mRNAdown
CNGA1	down-regulated		APOC2	down-regulated		ELOBP1	down-regulated		GRAMD2B	mRNAdown
VILL	down-regulated		ZBTB44-DT	down-regulated		AC006042.2	down-regulated		SUCLG2	mRNAdown
MSH5-SAPCD1	down-regulated		ALG1L12P	down-regulated		LINC02325	down-regulated		FAM47E	mRNAdown
KRT8P34	down-regulated		AC023794.2	down-regulated		AC102945.2	down-regulated		MLH1	mRNAdown
C4A	down-regulated		AC245884.10	down-regulated		CCDC102B	down-regulated		ABHD14A	mRNAdown
AC027243.1	down-regulated		RPS15AP38	down-regulated		CCL16	down-regulated		COMMD6	mRNAdown
LINC01600	down-regulated		AC092437.1	down-regulated		AC099521.2	down-regulated		MAP1S	mRNAdown
AC004835.1	down-regulated		ZNF177	down-regulated		CRTAC1	down-regulated		KLHDC9	mRNAdown
AC145285.6	down-regulated		MYO15B	down-regulated		AC092471.1	down-regulated		C20orf96	mRNAdown
UPF3AP1	down-regulated		LINC00574	down-regulated		AC005740.4	down-regulated		MTFR1L	mRNAdown
AC020658.4	down-regulated		PLEKHH1	down-regulated		LPL	down-regulated		SERPINA5	mRNAdown
AC092354.1	down-regulated		AL078459.1	down-regulated		SCUBE3	down-regulated		PHF11	mRNAdown
MYOCD	down-regulated		JPH2	down-regulated		WDFY4	down-regulated		MAST3	mRNAdown
AC006059.2	down-regulated		DNALI1	down-regulated		ZCCHC12	down-regulated		ACY3	mRNAdown
SLC25A34-AS1	down-regulated		ANKRD24	down-regulated		AL022097.1	down-regulated		MAATS1	mRNAdown
TEKT2	down-regulated		AC139453.2	down-regulated		AC139769.3	down-regulated		IQCK	mRNAdown
EPB41L4A	down-regulated		ASS1P9	down-regulated		AL359263.1	down-regulated		CRYZL1	mRNAdown
LINC00543	down-regulated		LINC02018	down-regulated		C9orf50	down-regulated		CCR9	mRNAdown
RAB19	down-regulated		AC008747.1	down-regulated		AC010931.1	down-regulated		FMO4	mRNAdown
CALML4	down-regulated		AC007485.1	down-regulated		AC074138.1	down-regulated		PGRMC2	mRNAdown
BX664727.3	down-regulated		ZG16	down-regulated		TRAV35	down-regulated		MUC3A	mRNAdown
RHD	down-regulated		BCL2L14	down-regulated		AC006116.2	down-regulated		TBC1D5	mRNAdown
AC104996.2	down-regulated		LINC00345	down-regulated		CCDC160	down-regulated		MYO6	mRNAdown
ADAMTS9	down-regulated		AC005083.1	down-regulated		DRC1	down-regulated		FAS	mRNAdown
TSPOAP1	down-regulated		AL353705.3	down-regulated		AC092111.1	down-regulated		BTN3A2	mRNAdown
AL132780.5	down-regulated		AC012618.1	down-regulated		AC092802.2	down-regulated		SOD3	mRNAdown
LINC01962	down-regulated		SIRPD	down-regulated		NAP1L3	down-regulated		CYP21A2	mRNAdown
LINC00857	down-regulated		AC137630.3	down-regulated		FAAHP1	down-regulated		ZNF175	mRNAdown
PLCD3	down-regulated		FAM221B	down-regulated		AC091152.4	down-regulated		KIAA1143	mRNAdown
PROC	down-regulated		AC104390.1	down-regulated		NMUR1	down-regulated		TSGA10	mRNAdown
TRIM74	down-regulated		POU1F1	down-regulated		LCN6	down-regulated		CCNB3	mRNAdown
CFAP69	down-regulated		AKAP5	down-regulated		RPL10P7	down-regulated		RBMS2	mRNAdown
HOXB2	down-regulated		PDZD9	down-regulated		FGF20	down-regulated		GLB1L	mRNAdown
AC106739.1	down-regulated		RN7SL262P	down-regulated		RGL3	down-regulated		TAPBP	mRNAdown
P4HA2-AS1	down-regulated		RPL21P18	down-regulated		LINC02587	down-regulated		RASEF	mRNAdown
AL133215.3	down-regulated		AC137834.1	down-regulated		AJ011932.1	down-regulated		MAPK9	mRNAdown
AC004224.1	down-regulated		AC008759.2	down-regulated		ACY3	down-regulated		LRRC31	mRNAdown
NACA2	down-regulated		UBXN10-AS1	down-regulated		ASIC2	down-regulated		ZNF540	mRNAdown
AP001264.1	down-regulated		AC099811.5	down-regulated		RBM22P2	down-regulated		CYP4V2	mRNAdown
ACOT6	down-regulated		GPR25	down-regulated		TRBV7-6	down-regulated		SRR	mRNAdown
AGAP10P	down-regulated		RNA5SP111	down-regulated		AC010547.1	down-regulated		TERB1	mRNAdown
AC087392.2	down-regulated		TBC1D3L	down-regulated		ADAMTS16	down-regulated		AP4B1	mRNAdown
CCDC146	down-regulated		AJAP1	down-regulated		CRIP3	down-regulated		PLS1	mRNAdown
RPL15P18	down-regulated		AC009779.4	down-regulated		AC007681.1	down-regulated		AKR7A2	mRNAdown
AL512430.3	down-regulated		AGAP10P	down-regulated		RPL12P25	down-regulated		CGGBP1	mRNAdown
OGFR-AS1	down-regulated		AC004080.2	down-regulated		SCN1A	down-regulated		P4HTM	mRNAdown
AL080317.1	down-regulated		AC112187.3	down-regulated		AL158166.2	down-regulated		CMC1	mRNAdown
CEACAM8	down-regulated		AC096564.2	down-regulated		TMEM200A	down-regulated		PDK2	mRNAdown
FCGBP	down-regulated		AQP6	down-regulated		TLR8	down-regulated		UBA3	mRNAdown
AC003688.1	down-regulated		AL591848.4	down-regulated		CCDC68	down-regulated		DDAH2	mRNAdown
FGF22	down-regulated		MYL6P5	down-regulated		SIGLEC7	down-regulated		STX7	mRNAdown
ZNF69	down-regulated		AMACR	down-regulated		KLF17	down-regulated		GBP2	mRNAdown
AC080013.2	down-regulated		LINC02593	down-regulated		AC006272.2	down-regulated		TM4SF18	mRNAdown
AC005154.1	down-regulated		AC011944.1	down-regulated		AL133346.1	down-regulated		PTER	mRNAdown
BCL2L15	down-regulated		KCNA5	down-regulated		MAMDC2-AS1	down-regulated		SNX2	mRNAdown
CCDC40	down-regulated		ANGPTL8	down-regulated		KCNA3	down-regulated		PCGF2	mRNAdown
DNASE1L2	down-regulated		AC090515.3	down-regulated		PTGER2	down-regulated		IQCD	mRNAdown
DCTN1-AS1	down-regulated		AC099342.1	down-regulated		SERP2	down-regulated		PRUNE2	mRNAdown
AC060766.6	down-regulated		PLIN5	down-regulated		DBIL5P2	down-regulated		C4orf33	mRNAdown
AC002306.1	down-regulated		AC007639.1	down-regulated		ANKRD24	down-regulated		CCDC40	mRNAdown
ACKR4	down-regulated		ATP8A2P2	down-regulated		AL021328.1	down-regulated		CCDC160	mRNAdown
PLGLB1	down-regulated		LCN6	down-regulated		FAM162B	down-regulated		IGSF5	mRNAdown
CLCN1	down-regulated		KRT18P28	down-regulated		AL606490.8	down-regulated		ELMOD2	mRNAdown
AC091806.1	down-regulated		GATM	down-regulated		AL645939.4	down-regulated		HAVCR1	mRNAdown
DUSP5P2	down-regulated		RPS4XP7	down-regulated		AC006270.1	down-regulated		RNF5	mRNAdown
LIPE-AS1	down-regulated		CCL14	down-regulated		CD300C	down-regulated		MMEL1	mRNAdown
C4orf19	down-regulated		Z98257.1	down-regulated		TRBV15	down-regulated		DYNLRB1	mRNAdown
AL355490.2	down-regulated		RNY3P8	down-regulated		AC005759.1	down-regulated		LASP1	mRNAdown
RAPGEF3	down-regulated		NEURL3	down-regulated		RLN1	down-regulated		POPDC2	mRNAdown
KRT18P23	down-regulated		AC005740.4	down-regulated		AC015795.1	down-regulated		RAB17	mRNAdown
GAS6-AS1	down-regulated		MCM8-AS1	down-regulated		DACT3	down-regulated		IVD	mRNAdown
HPD	down-regulated		ZRANB2-AS1	down-regulated		AL031595.1	down-regulated		EPOR	mRNAdown
AC091685.2	down-regulated		AC005326.1	down-regulated		AC006272.1	down-regulated		MVP	mRNAdown
AL355297.3	down-regulated		GLYCTK-AS1	down-regulated		AC010624.2	down-regulated		ARHGEF40	mRNAdown
ATP5MC2P1	down-regulated		OCLNP1	down-regulated		FAT4	down-regulated		LY6G5C	mRNAdown
ZNF763	down-regulated		AL359092.1	down-regulated		AL023583.1	down-regulated		HSD3B7	mRNAdown
AC011330.2	down-regulated		FIGN	down-regulated		CCR3	down-regulated		DALRD3	mRNAdown
RPL21P89	down-regulated		AMBP	down-regulated		RNF216-IT1	down-regulated		BCO1	mRNAdown
LBX2	down-regulated		AC100788.2	down-regulated		ADAMTSL3	down-regulated		NEK11	mRNAdown
U91328.3	down-regulated		HOXB6	down-regulated		PRR29	down-regulated		CACNA1D	mRNAdown
KRT18P48	down-regulated		RAP2CP1	down-regulated		ZCWPW2	down-regulated		LMAN2	mRNAdown
HOXB-AS1	down-regulated		MKRN2OS	down-regulated		TRBV14	down-regulated		MYRF	mRNAdown
AC098851.1	down-regulated		AC092718.6	down-regulated		TLK2P2	down-regulated		SEPSECS	mRNAdown
ADH6	down-regulated		AL161785.1	down-regulated		CXCR5	down-regulated		CYP3A7	mRNAdown
AP004608.1	down-regulated		SEMA3B	down-regulated		TEKT4	down-regulated		PIH1D2	mRNAdown
HRCT1	down-regulated		GOLGA8Q	down-regulated		FAM227A	down-regulated		ERBB3	mRNAdown
AC005696.4	down-regulated		HMGB2P1	down-regulated		LINC00862	down-regulated		ACSM1	mRNAdown
ADHFE1	down-regulated		HOXB5	down-regulated		AL391261.3	down-regulated		TMCO4	mRNAdown
AC087752.4	down-regulated		LINC01597	down-regulated		BNIP3P10	down-regulated		WDR35	mRNAdown
AC008443.6	down-regulated		HUNK	down-regulated		ENPP4	down-regulated		CLU	mRNAdown
APOM	down-regulated		ZMYND12	down-regulated		FO681492.1	down-regulated		KCTD6	mRNAdown
STRC	down-regulated		PLEKHH2	down-regulated		CSNK1A1L	down-regulated		HMGCL	mRNAdown
AC099518.4	down-regulated		KRT18P21	down-regulated		AOC3	down-regulated		ACAA1	mRNAdown
AMN	down-regulated		RAB9B	down-regulated		LINC00924	down-regulated		SPNS3	mRNAdown
FARSA-AS1	down-regulated		CLCNKA	down-regulated		AC007849.1	down-regulated		SETDB2	mRNAdown
AL645608.8	down-regulated		AC090543.2	down-regulated		ZNF429	down-regulated		HNF4A	mRNAdown
RHOT1P1	down-regulated		ASRGL1	down-regulated		TPK1	down-regulated		FAM185A	mRNAdown
AC073909.1	down-regulated		TTC21A	down-regulated		RPL21P7	down-regulated		OXER1	mRNAdown
RNASE13	down-regulated		CYP4V2	down-regulated		AC092068.2	down-regulated		TREH	mRNAdown
RNU6-483P	down-regulated		AL583810.1	down-regulated		PCDHA4	down-regulated		FDX2	mRNAdown
IMPG1	down-regulated		AC025822.2	down-regulated		TRAV39	down-regulated		ACBD4	mRNAdown
SH3TC2-DT	down-regulated		AL109936.3	down-regulated		TRAV13-1	down-regulated		MSRA	mRNAdown
ATP7B	down-regulated		RPL34P18	down-regulated		MTCO2P16	down-regulated		IMPG1	mRNAdown
AC005083.1	down-regulated		AC233266.2	down-regulated		PLEKHB1	down-regulated		CAP2	mRNAdown
NWD1	down-regulated		AC073283.1	down-regulated		GATA6	down-regulated		NOX1	mRNAdown
AC243773.2	down-regulated		CFAP43	down-regulated		TMEM273	down-regulated		NFKBIE	mRNAdown
AL022393.1	down-regulated		ATP5MGP2	down-regulated		AL158071.4	down-regulated		ME3	mRNAdown
HMGB2P1	down-regulated		AC245060.5	down-regulated		PIEZO2	down-regulated		TCTN2	mRNAdown
SLX1A-SULT1A3	down-regulated		SATB2	down-regulated		AC108063.1	down-regulated		CHST5	mRNAdown
KRT8P18	down-regulated		KRTAP2-3	down-regulated		TMSB4XP2	down-regulated		CASC1	mRNAdown
SH3GL1P2	down-regulated		ZNF844	down-regulated		TTC34	down-regulated		CLRN3	mRNAdown
AC244197.3	down-regulated		RNU1-153P	down-regulated		PTP4A2P2	down-regulated		CARF	mRNAdown
AC102945.2	down-regulated		AC243962.1	down-regulated		LINC02391	down-regulated		ACOT4	mRNAdown
AC131025.1	down-regulated		MACORIS	down-regulated		MAN1C1	down-regulated		GKAP1	mRNAdown
GUSBP3	down-regulated		LNC-LBCS	down-regulated		AL109659.2	down-regulated		ADAM22	mRNAdown
AC245100.4	down-regulated		AC093525.10	down-regulated		ST8SIA4	down-regulated		AL365205.1	mRNAdown
OLA1P3	down-regulated		AL049634.1	down-regulated		EDNRB	down-regulated		SLC25A38	mRNAdown
HMGB1P3	down-regulated		KRT8P18	down-regulated		TMEM150B	down-regulated		TESC	mRNAdown
CAPN3	down-regulated		IGFALS	down-regulated		AL731557.1	down-regulated		AR	mRNAdown
OSBPL10-AS1	down-regulated		C4orf19	down-regulated		SARDH	down-regulated		SESN2	mRNAdown
AC018809.1	down-regulated		AL354733.2	down-regulated		RPS15AP40	down-regulated		PNPO	mRNAdown
AL161729.2	down-regulated		SLC22A5	down-regulated		ZNF626	down-regulated		TMF1	mRNAdown
EIF3KP1	down-regulated		GPR35	down-regulated		ZNF415	down-regulated		NEK3	mRNAdown
AC107982.3	down-regulated		AC010333.2	down-regulated		HMGN1P30	down-regulated		TTC38	mRNAdown
AC016405.3	down-regulated		C1QTNF7	down-regulated		NRG2	down-regulated		SMARCE1	mRNAdown
RBM22P2	down-regulated		AC069528.2	down-regulated		AL161457.2	down-regulated		SAR1B	mRNAdown
AC109454.4	down-regulated		CDC42-IT1	down-regulated		ZNF763	down-regulated		TOB1	mRNAdown
AC110285.2	down-regulated		AC126118.1	down-regulated		PLEKHG7	down-regulated		DPCD	mRNAdown
AC084018.2	down-regulated		PCDHA2	down-regulated		MILR1	down-regulated		SLC25A53	mRNAdown
AC018638.7	down-regulated		TM4SF18	down-regulated		ATP5PBP5	down-regulated		PDE12	mRNAdown
AC093525.4	down-regulated		AP006621.4	down-regulated		PRELID2P1	down-regulated		RNLS	mRNAdown
TAS2R64P	down-regulated		ENPP7P4	down-regulated		LINC02528	down-regulated		FAM161B	mRNAdown
AC009088.1	down-regulated		DRC3	down-regulated		CDH20	down-regulated		PYROXD2	mRNAdown
AC138150.2	down-regulated		Z97989.1	down-regulated		AC011447.7	down-regulated		ZNF684	mRNAdown
AC023043.3	down-regulated		AL031722.1	down-regulated		RNASE4	down-regulated		MITF	mRNAdown
AC109449.1	down-regulated		AC011466.4	down-regulated		LINC00426	down-regulated		FNBP1L	mRNAdown
C1QTNF1-AS1	down-regulated		NPR1	down-regulated		AL023881.1	down-regulated		C17orf50	mRNAdown
SPTLC3	down-regulated		RNF183	down-regulated		TPTE2P1	down-regulated		RAB3IP	mRNAdown
SLC26A7	down-regulated		SLC25A14P1	down-regulated		SPAG8	down-regulated		ZNF852	mRNAdown
NME9	down-regulated		AC026150.2	down-regulated		AWAT2	down-regulated		RAB19	mRNAdown
ITIH4-AS1	down-regulated		AC025171.4	down-regulated		TOX3	down-regulated		ITM2B	mRNAdown
MYL6P5	down-regulated		UCA1	down-regulated		ZNF540	down-regulated		FOXJ1	mRNAdown
MACC1	down-regulated		KRT8P40	down-regulated		CCDC173	down-regulated		AVPR1B	mRNAdown
GOLGA8R	down-regulated		C1orf127	down-regulated		FLT3	down-regulated		ADGRF1	mRNAdown
AL161725.2	down-regulated		RERE-AS1	down-regulated		AC010615.1	down-regulated		FRMD5	mRNAdown
AL158211.1	down-regulated		CLDN3	down-regulated		LHFPL1	down-regulated		ULK4	mRNAdown
STPG3-AS1	down-regulated		CLYBL	down-regulated		ST6GALNAC3	down-regulated		SORT1	mRNAdown
AC093827.3	down-regulated		GPR62	down-regulated		TRAV18	down-regulated		HESX1	mRNAdown
RNA5SP187	down-regulated		EPB41L4A	down-regulated		SPATA45	down-regulated		SLC25A35	mRNAdown
AC010530.1	down-regulated		LRMDA	down-regulated		FGF7	down-regulated		GPD1	mRNAdown
NPIPB5	down-regulated		SLC44A4	down-regulated		ACSM1	down-regulated		WDR19	mRNAdown
LINC01979	down-regulated		AL390728.2	down-regulated		RPS6KA2-IT1	down-regulated		MMP24OS	mRNAdown
OXCT2	down-regulated		HOXA13	down-regulated		TSPAN12	down-regulated		NDUFA2	mRNAdown
FGF17	down-regulated		OTOAP1	down-regulated		CCRL2	down-regulated		SULT1C2	mRNAdown
CDC42P4	down-regulated		PPP1R9A	down-regulated		HLX-AS1	down-regulated		NBR1	mRNAdown
HOXA2	down-regulated		AC241585.2	down-regulated		KRT18P10	down-regulated		ZNF320	mRNAdown
LINC01554	down-regulated		AL390208.1	down-regulated		APBB1IP	down-regulated		TLE2	mRNAdown
EIF5AP2	down-regulated		FRGCA	down-regulated		TRGV3	down-regulated		GPRC5C	mRNAdown
AL592211.1	down-regulated		AC120498.9	down-regulated		SLC12A5	down-regulated		LACTB2	mRNAdown
SEC31B	down-regulated		POU5F1	down-regulated		EFHD1	down-regulated		ZNF747	mRNAdown
HPCA	down-regulated		RPL23AP49	down-regulated		GALNT16	down-regulated		ACSF2	mRNAdown
MIR6814	down-regulated		AC007448.4	down-regulated		AC016582.3	down-regulated		BCL2L15	mRNAdown
C19orf71	down-regulated		AP003733.1	down-regulated		WDFY3-AS2	down-regulated		CLDN9	mRNAdown
ZBTB20-AS4	down-regulated		DLG3-AS1	down-regulated		AP001282.2	down-regulated		NPRL2	mRNAdown
SLX1A	down-regulated		KRT8P37	down-regulated		TRBV19	down-regulated		CNDP2	mRNAdown
SEL1L2	down-regulated		KRT18P37	down-regulated		WDR64	down-regulated		RAB9B	mRNAdown
AL049612.1	down-regulated		TAS2R3	down-regulated		AC008555.1	down-regulated		SPATA12	mRNAdown
AC003002.2	down-regulated		SNRPGP5	down-regulated		SIRPB2	down-regulated		CACFD1	mRNAdown
LINC01479	down-regulated		AP000350.3	down-regulated		CLMAT3	down-regulated		SVIP	mRNAdown
AL354760.1	down-regulated		GPER1	down-regulated		NME9	down-regulated		TEX9	mRNAdown
AL138999.1	down-regulated		RPL23AP75	down-regulated		AC011447.3	down-regulated		KANK3	mRNAdown
AC079779.2	down-regulated		C1GALT1P1	down-regulated		MFSD6L	down-regulated		HRCT1	mRNAdown
AL355922.2	down-regulated		MYL12AP1	down-regulated		LAIR1	down-regulated		ZNF442	mRNAdown
AC084757.1	down-regulated		CFL1P3	down-regulated		AC004947.2	down-regulated		REPS2	mRNAdown
NPIPB15	down-regulated		AC005670.1	down-regulated		C19orf18	down-regulated		ANO10	mRNAdown
AL158163.1	down-regulated		HMGB1P49	down-regulated		AC004982.2	down-regulated		INCA1	mRNAdown
AC093278.1	down-regulated		TRBV7-7	down-regulated		AC009495.1	down-regulated		NPY1R	mRNAdown
AC104113.1	down-regulated		AC105020.5	down-regulated		SLC6A1	down-regulated		CHDH	mRNAdown
NOX1	down-regulated		MACC1	down-regulated		KRT18P55	down-regulated		KIF9	mRNAdown
AC015909.5	down-regulated		AC011458.1	down-regulated		AL354798.1	down-regulated		DHRS7B	mRNAdown
AC233968.1	down-regulated		TSTD3	down-regulated		PCDH11X	down-regulated		AQP6	mRNAdown
AC010680.4	down-regulated		AC016590.3	down-regulated		TNFSF12-TNFSF13	down-regulated		FAM228B	mRNAdown
MIR378A	down-regulated		LINC01342	down-regulated		VIL1	down-regulated		NR2F2	mRNAdown
GAS5-AS1	down-regulated		AL645941.2	down-regulated		AL118511.1	down-regulated		NME9	mRNAdown
AL390961.3	down-regulated		AC013489.1	down-regulated		KRT18P17	down-regulated		DUSP23	mRNAdown
AC092881.1	down-regulated		AC246817.1	down-regulated		FUT8-AS1	down-regulated		NPIPB9	mRNAdown
AC008770.1	down-regulated		EFCAB6	down-regulated		AC025580.1	down-regulated		C9orf116	mRNAdown
AC233992.2	down-regulated		AC094019.2	down-regulated		ITIH3	down-regulated		CCDC107	mRNAdown
KRT18P4	down-regulated		AC246817.2	down-regulated		C21orf62-AS1	down-regulated		PRR13	mRNAdown
OR7E14P	down-regulated		AC009949.1	down-regulated		IL21	down-regulated		ASL	mRNAdown
AL590822.1	down-regulated		HSD17B2	down-regulated		AC104211.1	down-regulated		KLHDC7A	mRNAdown
CACNB2	down-regulated		FCF1P7	down-regulated		EFCAB5	down-regulated		CCDC125	mRNAdown
AMT	down-regulated		KCNMB1	down-regulated		C11orf52	down-regulated		STK36	mRNAdown
TPPP2	down-regulated		NOX1	down-regulated		KCNRG	down-regulated		ZNF691	mRNAdown
AC137630.1	down-regulated		KRT18P11	down-regulated		WDR63	down-regulated		RPGRIP1L	mRNAdown
AC005534.2	down-regulated		AL731567.1	down-regulated		SYT2	down-regulated		ZNF808	mRNAdown
AL358072.1	down-regulated		RHOT1P1	down-regulated		ATP8A2P2	down-regulated		NRL	mRNAdown
C21orf62-AS1	down-regulated		AC008760.2	down-regulated		ZNF534	down-regulated		GPBAR1	mRNAdown
RNVU1-3	down-regulated		GAS2	down-regulated		AC093627.7	down-regulated		CFAP69	mRNAdown
AP001636.1	down-regulated		AC010547.1	down-regulated		AC111152.3	down-regulated		TTC39A	mRNAdown
MIR193A	down-regulated		AC018648.1	down-regulated		TM6SF1	down-regulated		PRICKLE4	mRNAdown
KIF28P	down-regulated		AC063944.3	down-regulated		RNU5B-4P	down-regulated		PALM3	mRNAdown
HLA-V	down-regulated		AC004982.2	down-regulated		MEIS3P2	down-regulated		STX18	mRNAdown
AGBL3	down-regulated		RAI1-AS1	down-regulated		AC093535.1	down-regulated		IL4	mRNAdown
RBMXL2	down-regulated		ABCB4	down-regulated		AC117498.3	down-regulated		UMAD1	mRNAdown
AL627389.1	down-regulated		RNU6-483P	down-regulated		ABHD11-AS1	down-regulated		NEK8	mRNAdown
ACBD7	down-regulated		HSPE1P4	down-regulated		OR7E7P	down-regulated		FAM47E-STBD1	mRNAdown
SCX	down-regulated		AC018523.1	down-regulated		HTR2A	down-regulated		CBX7	mRNAdown
CATSPER4	down-regulated		GLYCTK	down-regulated		WDR45BP1	down-regulated		TRNT1	mRNAdown
RNU6-353P	down-regulated		HMGB1P51	down-regulated		AC072052.1	down-regulated		TMBIM6	mRNAdown
MIR106B	down-regulated		AC012464.3	down-regulated		ZNF781	down-regulated		FUCA1	mRNAdown
PHBP21	down-regulated		XRCC6P4	down-regulated		AL133297.2	down-regulated		MRPS36	mRNAdown
AL139349.1	down-regulated		OR52B3P	down-regulated		CCDC60	down-regulated		ARSD	mRNAdown
MIR4701	down-regulated		GDF15	down-regulated		MDS2	down-regulated		GLRX	mRNAdown
CBWD3	down-regulated		ANGPT4	down-regulated		HDX	down-regulated		KRT7	mRNAdown
AC018755.1	down-regulated		TEKT2	down-regulated		AL603839.3	down-regulated		ZNF396	mRNAdown
AL031847.1	down-regulated		AC104667.2	down-regulated		SMPDL3B	down-regulated		STS	mRNAdown
PKDREJ	down-regulated		ALDH7A1P1	down-regulated		AL139246.3	down-regulated		ICA1	mRNAdown
AC007036.1	down-regulated		ZNF441	down-regulated		TRBV11-2	down-regulated		RAPGEF2	mRNAdown
CBY3	down-regulated		AL121748.1	down-regulated		PRMT1P1	down-regulated		SLC10A5	mRNAdown
WFDC1	down-regulated		AC005786.1	down-regulated		GZMK	down-regulated		HNF1B	mRNAdown
PPIAP87	down-regulated		AL139246.3	down-regulated		AC138207.8	down-regulated		DYNC2LI1	mRNAdown
AL121583.1	down-regulated		AC011481.3	down-regulated		AL512652.2	down-regulated		WDR48	mRNAdown
AL512303.1	down-regulated		AC024941.1	down-regulated		AL121768.1	down-regulated		MRPS25	mRNAdown
CATSPER3	down-regulated		AC010619.3	down-regulated		ITGBL1	down-regulated		RORC	mRNAdown
BMS1P1	down-regulated		AC116424.1	down-regulated		AC244453.2	down-regulated		METTL27	mRNAdown
AC018904.1	down-regulated		SLC27A2	down-regulated		MATN3	down-regulated		SCMH1	mRNAdown
AC104170.1	down-regulated		AC015987.1	down-regulated		TEKT5	down-regulated		WFDC1	mRNAdown
AC010331.1	down-regulated		AC084757.4	down-regulated		AC020978.3	down-regulated		COMMD9	mRNAdown
AL157791.2	down-regulated		KRT8P34	down-regulated		SERPINA1	down-regulated		GLB1	mRNAdown
AL645933.1	down-regulated		PIK3CD-AS1	down-regulated		AC108114.1	down-regulated		MOCS2	mRNAdown
AC138932.1	down-regulated		AC008569.2	down-regulated		RNY3P8	down-regulated		MGRN1	mRNAdown
NPM1P25	down-regulated		AC022182.2	down-regulated		SLAIN1	down-regulated		PLEKHA6	mRNAdown
RNU6-652P	down-regulated		SPAG16-DT	down-regulated		AC243960.1	down-regulated		CYFIP2	mRNAdown
NALT1	down-regulated		LINC00643	down-regulated		PABPC5	down-regulated		EPM2AIP1	mRNAdown
AL139246.1	down-regulated		LINC01402	down-regulated		AP002381.1	down-regulated		ZCWPW2	mRNAdown
RNF207	down-regulated		AC099329.2	down-regulated		WFDC10B	down-regulated		GLOD5	mRNAdown
GPR35	down-regulated		MROH7	down-regulated		ST3GAL5	down-regulated		REPIN1	mRNAdown
MSTN	down-regulated		RN7SL388P	down-regulated		KRT8P37	down-regulated		YPEL3	mRNAdown
AC004982.1	down-regulated		AL049612.1	down-regulated		AC011294.1	down-regulated		GNPTG	mRNAdown
ZBTB8B	down-regulated		ITIH4-AS1	down-regulated		ZNF730	down-regulated		NPDC1	mRNAdown
CD160	down-regulated		HOXA-AS2	down-regulated		RPSAP46	down-regulated		TEX264	mRNAdown
HOXB3	down-regulated		AC084082.1	down-regulated		AC106028.2	down-regulated		CYBA	mRNAdown
AC110792.3	down-regulated		LINC00562	down-regulated		WT1-AS	down-regulated		FRMD3	mRNAdown
C4B	down-regulated		AC108134.4	down-regulated		MFSD4A	down-regulated		RASSF7	mRNAdown
GDAP1L1	down-regulated		SEMA3B-AS1	down-regulated		MLPH	down-regulated		FAM151B	mRNAdown
AC083862.2	down-regulated		AC104211.1	down-regulated		AL118508.3	down-regulated		PTPN18	mRNAdown
AL513477.1	down-regulated		RPS2P2	down-regulated		TOMM20P2	down-regulated		NDUFAF3	mRNAdown
AC104695.3	down-regulated		ZNF442	down-regulated		GPR34	down-regulated		KLC4	mRNAdown
HNRNPUL2-BSCL2	down-regulated		AC100771.1	down-regulated		RPS3AP54	down-regulated		ALOX5	mRNAdown
BX640514.2	down-regulated		KLF15	down-regulated		SLCO2B1	down-regulated		SLC25A26	mRNAdown
AC007639.1	down-regulated		SNORA63C	down-regulated		ITGB3	down-regulated		RPL29	mRNAdown
AC024940.1	down-regulated		SERBP1P3	down-regulated		AC015917.2	down-regulated		SLC44A2	mRNAdown
SEC23A-AS1	down-regulated		FOXD4L4	down-regulated		Z99127.1	down-regulated		ZNF197	mRNAdown
AL035252.4	down-regulated		MST1L	down-regulated		EEF1A1P3	down-regulated		TTLL6	mRNAdown
AC009097.2	down-regulated		AL162411.1	down-regulated		SLC44A4	down-regulated		SMIM22	mRNAdown
PURPL	down-regulated		MTRNR2L12	down-regulated		PCNPP5	down-regulated		ZNF141	mRNAdown
OR7E128P	down-regulated		AC135983.4	down-regulated		ISM1-AS1	down-regulated		SLC26A8	mRNAdown
KLF3-AS1	down-regulated		C5orf47	down-regulated		GPR18	down-regulated		TRIM31	mRNAdown
HNRNPA1P22	down-regulated		AC093311.1	down-regulated		AC127070.2	down-regulated		ZNF596	mRNAdown
EQTN	down-regulated		AC097359.2	down-regulated		AC090602.1	down-regulated		BCLAF3	mRNAdown
AL021807.1	down-regulated		RPL23AP95	down-regulated		AC034102.8	down-regulated		DYNLT1	mRNAdown
AP000866.5	down-regulated		NOTCH2NLA	down-regulated		AC009090.3	down-regulated		TMEM143	mRNAdown
AP003419.2	down-regulated		AL121845.4	down-regulated		ENPP7P2	down-regulated		HSD17B4	mRNAdown
CCL28	down-regulated		LIN7A	down-regulated		LY9	down-regulated		MROH8	mRNAdown
MROH3P	down-regulated		KRT18P19	down-regulated		TTC3P1	down-regulated		GFI1B	mRNAdown
AC137770.1	down-regulated		AC018752.1	down-regulated		TRBC1	down-regulated		SCRG1	mRNAdown
AC006237.1	down-regulated		ERAS	down-regulated		LINC02018	down-regulated		OGG1	mRNAdown
AC012467.2	down-regulated		ALDH1A2	down-regulated		SMARCE1P5	down-regulated		ABHD15	mRNAdown
AP000695.3	down-regulated		SORBS1	down-regulated		CA3	down-regulated		MPND	mRNAdown
COX7CP1	down-regulated		RN7SL619P	down-regulated		ANKRD20A5P	down-regulated		MPC1	mRNAdown
AC016747.3	down-regulated		AC005013.1	down-regulated		CFAP47	down-regulated		CDPF1	mRNAdown
AL136295.4	down-regulated		AC009090.3	down-regulated		PCDHB16	down-regulated		FAM149A	mRNAdown
FER1L4	down-regulated		AC021491.2	down-regulated		PRKCB	down-regulated		ZNF585B	mRNAdown
UNC79	down-regulated		CYFIP2	down-regulated		LHFPL3-AS1	down-regulated		DELE1	mRNAdown
AC090197.1	down-regulated		AF127577.5	down-regulated		CPM	down-regulated		C4orf19	mRNAdown
AL161719.1	down-regulated		AL162430.3	down-regulated		SERBP1P3	down-regulated		VWA5B1	mRNAdown
Z97653.1	down-regulated		HIGD1AP14	down-regulated		DEFB109F	down-regulated		SLC27A1	mRNAdown
AC106786.2	down-regulated		AC104785.1	down-regulated		AHCYP2	down-regulated		LRRC29	mRNAdown
AC006557.1	down-regulated		LCA5L	down-regulated		AC011477.2	down-regulated		ZNF76	mRNAdown
AL158163.2	down-regulated		AC010201.2	down-regulated		TSHR	down-regulated		RAF1	mRNAdown
ABCA10	down-regulated		AC005014.2	down-regulated		BNIP3P17	down-regulated		ZYX	mRNAdown
HCN3	down-regulated		AP001496.2	down-regulated		KRT18P38	down-regulated		RSPH1	mRNAdown
DEFB1	down-regulated		ABI3BP	down-regulated		HSD17B6	down-regulated		CCDC158	mRNAdown
AC010201.2	down-regulated		ACTBP7	down-regulated		TRAV8-2	down-regulated		SARM1	mRNAdown
FAM13A-AS1	down-regulated		DOK5	down-regulated		FRMD3	down-regulated		BEND7	mRNAdown
SSBP3-AS1	down-regulated		NDUFA3P4	down-regulated		LINC00535	down-regulated		CYB561D2	mRNAdown
BX005266.2	down-regulated		AC005180.1	down-regulated		NSRP1P1	down-regulated		KDM8	mRNAdown
AC026979.3	down-regulated		BICC1	down-regulated		SOWAHA	down-regulated		NRG2	mRNAdown
FAM229A	down-regulated		DPH6-DT	down-regulated		AL158166.1	down-regulated		WDR78	mRNAdown
MIR3142HG	down-regulated		SLX1A	down-regulated		CLDN3	down-regulated		AGFG2	mRNAdown
AP003059.1	down-regulated		AL022069.2	down-regulated		PTPRR	down-regulated		FCAMR	mRNAdown
AC106052.1	down-regulated		FPGT-TNNI3K	down-regulated		PDK4	down-regulated		MANEAL	mRNAdown
AL031722.1	down-regulated		ENPP1	down-regulated		AC051619.4	down-regulated		CYP4A11	mRNAdown
LRRN4CL	down-regulated		LINC00857	down-regulated		CHDH	down-regulated		RAB36	mRNAdown
SDHDP6	down-regulated		Z69666.1	down-regulated		SPDEF	down-regulated		ZNF444	mRNAdown
AL355488.1	down-regulated		TMEM200A	down-regulated		SLC22A18AS	down-regulated		SNX14	mRNAdown
EEF1G	down-regulated		RPS29P11	down-regulated		CADM3	down-regulated		FAM86B2	mRNAdown
AC079944.2	down-regulated		AC093591.2	down-regulated		LINC02427	down-regulated		RBKS	mRNAdown
GOLGA8N	down-regulated		AC099522.1	down-regulated		ATP13A4	down-regulated		HPD	mRNAdown
DISP3	down-regulated		PGBD4P3	down-regulated		TFPI	down-regulated		COTL1	mRNAdown
AL121782.1	down-regulated		AC146507.2	down-regulated		RPL23AP67	down-regulated		METTL9	mRNAdown
AC093535.1	down-regulated		AC040169.2	down-regulated		CATIP-AS1	down-regulated		DDRGK1	mRNAdown
HAAO	down-regulated		LINC02381	down-regulated		ZDHHC8P1	down-regulated		NFIB	mRNAdown
PPIAP4	down-regulated		SCARNA9	down-regulated		ITGA9	down-regulated		TRIM13	mRNAdown
AP006287.2	down-regulated		AC009690.1	down-regulated		KRT18P37	down-regulated		ADORA1	mRNAdown
AC018552.3	down-regulated		KRT18P25	down-regulated		ASS1P11	down-regulated		PLA2G15	mRNAdown
AL731567.1	down-regulated		SCN11A	down-regulated		LINC02080	down-regulated		ZNF69	mRNAdown
SLC26A1	down-regulated		AL158211.1	down-regulated		LACTB2-AS1	down-regulated		SAP18	mRNAdown
RPL18AP7	down-regulated		UBQLNL	down-regulated		ERBB4	down-regulated		SERPINB6	mRNAdown
AL031864.1	down-regulated		AC098679.2	down-regulated		RNU4-21P	down-regulated		FNDC3A	mRNAdown
CABP4	down-regulated		AC005225.4	down-regulated		EMBP1	down-regulated		TPK1	mRNAdown
BX546450.2	down-regulated		TMEM253	down-regulated		LRRC37A5P	down-regulated		RBM47	mRNAdown
AC010525.1	down-regulated		AL357874.1	down-regulated		GPR182	down-regulated		CRBN	mRNAdown
AC012618.2	down-regulated		HNRNPA1P14	down-regulated		DNAJC12	down-regulated		ATPAF1	mRNAdown
KCNV2	down-regulated		AL162724.1	down-regulated		PPIAP74	down-regulated		TTC21A	mRNAdown
DRC3	down-regulated		AC026689.1	down-regulated		AC097505.1	down-regulated		DNAJC28	mRNAdown
AC090948.3	down-regulated		FAM27E3	down-regulated		LINC01747	down-regulated		MARC2	mRNAdown
AC009159.2	down-regulated		AL139125.1	down-regulated		KRTAP5-AS1	down-regulated		HYKK	mRNAdown
RPS4XP1	down-regulated		SPATA6L	down-regulated		SPATA32	down-regulated		PADI2	mRNAdown
BIVM	down-regulated		FAM86B2	down-regulated		AL021408.1	down-regulated		METTL7A	mRNAdown
AC021491.4	down-regulated		AC015720.3	down-regulated		GPC4	down-regulated		EIF4E3	mRNAdown
AC010422.1	down-regulated		AC233699.1	down-regulated		AC090617.4	down-regulated		CAPN5	mRNAdown
AL449106.1	down-regulated		MPV17L	down-regulated		C8orf37-AS1	down-regulated		ABHD11	mRNAdown
BAIAP2L2	down-regulated		DDTP1	down-regulated		AC104461.1	down-regulated		INPP5D	mRNAdown
AL353754.1	down-regulated		TESC	down-regulated		RPS4XP20	down-regulated		RILP	mRNAdown
MIP	down-regulated		SEMA6A-AS1	down-regulated		EPDR1	down-regulated		TSPAN1	mRNAdown
TRPV1	down-regulated		AC012557.2	down-regulated		HSPD1P5	down-regulated		ZNF100	mRNAdown
ACSM3	down-regulated		RPL23AP67	down-regulated		LCA5L	down-regulated		B4GALT7	mRNAdown
AL451064.1	down-regulated		DOK7	down-regulated		SNAP91	down-regulated		TMEM220	mRNAdown
AP001527.2	down-regulated		ERVV-2	down-regulated		LINC01197	down-regulated		OXNAD1	mRNAdown
PDXDC2P	down-regulated		AC137630.1	down-regulated		UNC5C	down-regulated		RANGRF	mRNAdown
NEK5	down-regulated		AC104532.1	down-regulated		AL513174.1	down-regulated		AMY2B	mRNAdown
AC067930.4	down-regulated		SLC26A1	down-regulated		AC078785.1	down-regulated		CAB39L	mRNAdown
STARD13-AS	down-regulated		AC003070.2	down-regulated		HORMAD2-AS1	down-regulated		PKDCC	mRNAdown
RNU6-50P	down-regulated		AL627389.1	down-regulated		TMPRSS2	down-regulated		CCDC171	mRNAdown
AP001439.1	down-regulated		CCDC168	down-regulated		RTP5	down-regulated		FOXP1	mRNAdown
GPR137C	down-regulated		AMOT	down-regulated		AC018752.1	down-regulated		EFCAB13	mRNAdown
AC124312.2	down-regulated		NDUFB1P2	down-regulated		LINC02073	down-regulated		CABLES1	mRNAdown
AC145124.1	down-regulated		AL359313.1	down-regulated		TRGV7	down-regulated		CLUAP1	mRNAdown
RMST	down-regulated		AC139495.2	down-regulated		TMEM220-AS1	down-regulated		ALDOB	mRNAdown
OTUD7A	down-regulated		AC004908.3	down-regulated		RNU1-67P	down-regulated		LRP2BP	mRNAdown
HOXD4	down-regulated		AP000757.1	down-regulated		AC017104.1	down-regulated		PDSS2	mRNAdown
AC023830.3	down-regulated		AC040934.1	down-regulated		AL031768.1	down-regulated		CLEC4F	mRNAdown
AGAP13P	down-regulated		AL139383.1	down-regulated		CD69	down-regulated		PARD3B	mRNAdown
AL023803.1	down-regulated		SUCLG2-AS1	down-regulated		IGKV2D-24	down-regulated		ANXA4	mRNAdown
HMGN2P27	down-regulated		AC092068.2	down-regulated		BTK	down-regulated		CXCL16	mRNAdown
REPS2	down-regulated		AC111200.2	down-regulated		AC131956.2	down-regulated		GPR39	mRNAdown
CFAP44	down-regulated		AC087500.2	down-regulated		PCDHB7	down-regulated		PXK	mRNAdown
NEXN-AS1	down-regulated		AC096637.3	down-regulated		MICU3	down-regulated		TADA2B	mRNAdown
LINC02421	down-regulated		AL133215.1	down-regulated		AC012467.1	down-regulated		DENND2D	mRNAdown
RPL29P30	down-regulated		AC005674.1	down-regulated		INTS4P2	down-regulated		G6PC3	mRNAdown
TUBA8	down-regulated		CLCN4	down-regulated		TRAV26-1	down-regulated		GALNT16	mRNAdown
AC007485.1	down-regulated		PSMD10P1	down-regulated		RPL30P7	down-regulated		GORASP1	mRNAdown
HADHAP2	down-regulated		SPATA18	down-regulated		C9orf106	down-regulated		FCHO2	mRNAdown
DLG3-AS1	down-regulated		AP001264.1	down-regulated		AC025754.2	down-regulated		PGPEP1	mRNAdown
AC022509.4	down-regulated		ANKRD44-IT1	down-regulated		AC048380.2	down-regulated		TRIM8	mRNAdown
AC135050.3	down-regulated		AL138820.1	down-regulated		AP000866.2	down-regulated		WDR93	mRNAdown
FP565260.6	down-regulated		TIGD4	down-regulated		AL445307.1	down-regulated		S100A13	mRNAdown
RPS10P28	down-regulated		AP001094.2	down-regulated		SELENBP1	down-regulated		ANXA11	mRNAdown
USP2	down-regulated		HNRNPH1P3	down-regulated		GLRB	down-regulated		PNPLA2	mRNAdown
AC011466.3	down-regulated		AL109936.2	down-regulated		AKR1D1	down-regulated		SLC2A11	mRNAdown
AC226118.1	down-regulated		NPIPB2	down-regulated		FP325332.1	down-regulated		AQP7	mRNAdown
SLC9C1	down-regulated		RETREG1	down-regulated		C1orf162	down-regulated		AC073529.1	lncRNAup
AC245100.8	down-regulated		AC092354.1	down-regulated		SLC7A7	down-regulated		AC131009.2	lncRNAup
TTC21A	down-regulated		AC073909.1	down-regulated		ZNF571-AS1	down-regulated		FP325330.3	lncRNAup
AC131159.1	down-regulated		MYLK4	down-regulated		HSPE1P4	down-regulated		DNAH17-AS1	lncRNAup
SLFN13	down-regulated		CCDC189	down-regulated		ZNF844	down-regulated		AC113194.1	lncRNAup
AC009065.6	down-regulated		LRRC43	down-regulated		HCAR1	down-regulated		AC106795.3	lncRNAup
TOX3	down-regulated		TIMM9P2	down-regulated		HPN-AS1	down-regulated		LINC00517	lncRNAup
PKDCC	down-regulated		NPIPB1P	down-regulated		ZNF701	down-regulated		LINC01527	lncRNAup
AL023581.2	down-regulated		AC084398.2	down-regulated		AL162727.2	down-regulated		LINC01206	lncRNAup
GOLGA6L9	down-regulated		RNU6-1280P	down-regulated		PARM1	down-regulated		AC084816.1	lncRNAup
NOTCH2NLA	down-regulated		AL359885.1	down-regulated		ZNF682	down-regulated		AL358332.1	lncRNAup
AC092437.1	down-regulated		OVOL1-AS1	down-regulated		ZNF19	down-regulated		AF064858.1	lncRNAup
PALM3	down-regulated		RNF213-AS1	down-regulated		AC114980.1	down-regulated		AC004471.1	lncRNAup
CCT7P1	down-regulated		AC024267.4	down-regulated		PKN2-AS1	down-regulated		SNHG15	lncRNAup
HOXA5	down-regulated		AC011498.4	down-regulated		ZNF737	down-regulated		AC019205.1	lncRNAup
AC005306.1	down-regulated		PFN1P2	down-regulated		ZNF610	down-regulated		AC114956.1	lncRNAup
TMEM220	down-regulated		AC005899.2	down-regulated		HLA-DOA	down-regulated		AC099487.1	lncRNAup
AC007391.1	down-regulated		CYP4F12	down-regulated		RBMS3-AS3	down-regulated		LINC02579	lncRNAup
RBM26-AS1	down-regulated		CSDC2	down-regulated		TESC	down-regulated		AC026401.3	lncRNAup
AC090751.1	down-regulated		BTF3P8	down-regulated		ANO5	down-regulated		MIR2052HG	lncRNAup
PWAR1	down-regulated		PDXDC2P	down-regulated		SCARNA9	down-regulated		AC004490.1	lncRNAup
RASSF6	down-regulated		AP003032.1	down-regulated		PRAM1	down-regulated		DUXAP8	lncRNAup
CORT	down-regulated		AL353763.1	down-regulated		AC002091.1	down-regulated		LINC02043	lncRNAup
RN7SL262P	down-regulated		SULT1A3	down-regulated		FAM242C	down-regulated		LINC01127	lncRNAup
GP6	down-regulated		ZNF19	down-regulated		PPP5D1	down-regulated		AC104564.2	lncRNAup
AL133297.2	down-regulated		AC034236.3	down-regulated		AC106800.1	down-regulated		AL589986.2	lncRNAup
RPL19P11	down-regulated		ERICH5	down-regulated		PLEKHA6	down-regulated		AC128709.2	lncRNAup
AC131971.1	down-regulated		AL161729.3	down-regulated		C2orf72	down-regulated		LINC00941	lncRNAup
ADGRF3	down-regulated		RORC	down-regulated		ALDH3B1	down-regulated		AC019131.1	lncRNAup
AC004771.4	down-regulated		AC005899.8	down-regulated		LRRC10B	down-regulated		PART1	lncRNAup
AC087392.5	down-regulated		LEAP2	down-regulated		KCNJ10	down-regulated		KTN1-AS1	lncRNAup
MTCO2P12	down-regulated		ATP7B	down-regulated		AC010328.2	down-regulated		LINC01214	lncRNAup
AL117344.1	down-regulated		ULK4P2	down-regulated		AC008840.1	down-regulated		LINC00626	lncRNAup
AGMAT	down-regulated		AC009119.2	down-regulated		LINC02185	down-regulated		VPS9D1-AS1	lncRNAup
AC097359.2	down-regulated		AC127070.2	down-regulated		NAPSB	down-regulated		TM4SF19-AS1	lncRNAup
LURAP1	down-regulated		FAAHP1	down-regulated		AC093908.1	down-regulated		ZBTB11-AS1	lncRNAup
AC087392.3	down-regulated		AL645929.2	down-regulated		AL391832.2	down-regulated		AC009093.1	lncRNAup
AL450384.2	down-regulated		AC003688.1	down-regulated		RAB9B	down-regulated		MIR193BHG	lncRNAup
SMAD9	down-regulated		NPIPB10P	down-regulated		GDF5	down-regulated		DSG1-AS1	lncRNAup
AL451042.1	down-regulated		AP000350.7	down-regulated		HLA-DRB9	down-regulated		AC091182.2	lncRNAup
AC007919.1	down-regulated		AC011899.2	down-regulated		KCNA4	down-regulated		LINC00519	lncRNAup
C9orf163	down-regulated		AL023881.1	down-regulated		LINC00402	down-regulated		LINC02443	lncRNAup
[truncated: 13,581 more rows]

## Sheet: Sheet3 DEmiRNAs
Former smoker vs non-smoker			Current smoker vs non-smoker			Current smoker vs former smoker			Intersection
Gene	Type		Gene	Type		Gene	Type		Gene	Type
hsa-mir-885	down-regulated		hsa-mir-202	down-regulated		hsa-mir-202	down-regulated		hsa-mir-149	miRNAup
hsa-mir-202	down-regulated		hsa-mir-885	down-regulated		hsa-mir-3609	down-regulated		hsa-mir-550a-2	miRNAup
hsa-mir-4636	down-regulated		hsa-mir-4724	down-regulated		hsa-mir-3920	down-regulated		hsa-mir-379	miRNAup
hsa-mir-135a-2	down-regulated		hsa-mir-135a-2	down-regulated		hsa-mir-489	down-regulated		hsa-mir-193b	miRNAup
hsa-mir-4724	down-regulated		hsa-mir-592	down-regulated		hsa-mir-4709	down-regulated		hsa-mir-2277	miRNAup
hsa-mir-592	down-regulated		hsa-mir-4636	down-regulated		hsa-mir-552	down-regulated		hsa-mir-33a	miRNAup
hsa-mir-4775	down-regulated		hsa-mir-135a-1	down-regulated		hsa-mir-4423	down-regulated		hsa-mir-342	miRNAup
hsa-mir-196a-2	down-regulated		hsa-mir-4728	down-regulated		hsa-mir-1258	down-regulated		hsa-mir-3940	miRNAup
hsa-mir-196a-1	down-regulated		hsa-mir-4726	down-regulated		hsa-mir-548aw	down-regulated		hsa-mir-1271	miRNAup
hsa-mir-765	down-regulated		hsa-mir-3912	down-regulated		hsa-mir-215	down-regulated		hsa-mir-4714	miRNAup
hsa-mir-135a-1	down-regulated		hsa-mir-190a	down-regulated		hsa-mir-4728	down-regulated		hsa-mir-18a	miRNAup
hsa-mir-378d-1	down-regulated		hsa-mir-363	down-regulated		hsa-mir-6761	down-regulated		hsa-mir-629	miRNAup
hsa-mir-363	down-regulated		hsa-mir-196a-2	down-regulated		hsa-mir-151b	down-regulated		hsa-mir-590	miRNAup
hsa-mir-31	down-regulated		hsa-mir-194-1	down-regulated		hsa-mir-551b	down-regulated		hsa-mir-203a	miRNAup
hsa-mir-378d-2	down-regulated		hsa-mir-194-2	down-regulated		hsa-mir-184	down-regulated		hsa-mir-2355	miRNAup
hsa-mir-615	down-regulated		hsa-mir-196a-1	down-regulated		hsa-mir-592	down-regulated		hsa-mir-421	miRNAup
hsa-mir-483	down-regulated		hsa-mir-6892	down-regulated		hsa-mir-6892	down-regulated		hsa-mir-4772	miRNAup
hsa-mir-20b	down-regulated		hsa-mir-151b	down-regulated		hsa-mir-548b	down-regulated		hsa-mir-132	miRNAup
hsa-mir-190a	down-regulated		hsa-mir-20b	down-regulated		hsa-mir-653	down-regulated		hsa-mir-574	miRNAup
hsa-mir-196b	down-regulated		hsa-mir-5000	down-regulated		hsa-mir-216a	down-regulated		hsa-mir-6854	miRNAup
hsa-mir-6755	down-regulated		hsa-mir-1468	down-regulated		hsa-mir-514a-2	down-regulated		hsa-mir-219b	miRNAup
hsa-mir-4660	down-regulated		hsa-mir-192	down-regulated		hsa-mir-1468	down-regulated		hsa-mir-4664	miRNAup
hsa-mir-6734	down-regulated		hsa-mir-1-1	down-regulated		hsa-mir-514a-1	down-regulated		hsa-mir-381	miRNAup
hsa-mir-95	down-regulated		hsa-mir-196b	down-regulated		hsa-mir-3607	down-regulated		hsa-mir-345	miRNAup
hsa-mir-4728	down-regulated		hsa-mir-1-2	down-regulated		hsa-mir-194-1	down-regulated		hsa-mir-24-1	miRNAup
hsa-mir-5000	down-regulated		hsa-mir-30c-2	down-regulated		hsa-mir-664b	down-regulated		hsa-mir-136	miRNAup
hsa-mir-10b	down-regulated		hsa-mir-10b	down-regulated		hsa-mir-3653	down-regulated		hsa-mir-6728	miRNAup
hsa-mir-378c	down-regulated		hsa-mir-30c-1	down-regulated		hsa-mir-30a	down-regulated		hsa-mir-377	miRNAup
hsa-mir-194-2	down-regulated		hsa-mir-10a	down-regulated		hsa-mir-10a	down-regulated		hsa-mir-23a	miRNAup
hsa-mir-194-1	down-regulated		hsa-mir-30a	down-regulated		hsa-mir-195	down-regulated		hsa-mir-128-1	miRNAup
hsa-mir-133a-1	down-regulated		hsa-mir-99a	down-regulated		hsa-mir-34a	down-regulated		hsa-mir-4786	miRNAup
hsa-mir-450a-1	down-regulated		hsa-mir-34a	down-regulated		hsa-mir-148b	down-regulated		hsa-mir-154	miRNAup
hsa-mir-598	down-regulated		hsa-mir-200b	down-regulated		hsa-mir-30d	down-regulated		hsa-mir-874	miRNAup
hsa-mir-1-1	down-regulated		hsa-let-7c	down-regulated		hsa-let-7g	down-regulated		hsa-mir-1245a	miRNAup
hsa-mir-450a-2	down-regulated		hsa-mir-664a	down-regulated		hsa-mir-100	down-regulated		hsa-mir-212	miRNAup
hsa-mir-99a	down-regulated		hsa-mir-542	down-regulated		hsa-mir-101-2	down-regulated		hsa-mir-627	miRNAup
hsa-mir-30c-2	down-regulated		hsa-let-7f-2	down-regulated		hsa-mir-101-1	down-regulated		hsa-mir-137	miRNAup
hsa-mir-500b	down-regulated		hsa-let-7f-1	down-regulated		hsa-mir-30e	down-regulated		hsa-mir-579	miRNAup
hsa-mir-30c-1	down-regulated		hsa-mir-140	down-regulated		hsa-mir-25	up-regulated		hsa-mir-24-2	miRNAup
hsa-mir-200b	down-regulated		hsa-let-7g	down-regulated		hsa-mir-23a	up-regulated		hsa-mir-105-1	miRNAup
hsa-mir-429	down-regulated		hsa-mir-500a	down-regulated		hsa-mir-27b	up-regulated		hsa-mir-937	miRNAup
hsa-let-7c	down-regulated		hsa-let-7e	down-regulated		hsa-mir-92a-1	up-regulated		hsa-mir-296	miRNAup
hsa-mir-10a	down-regulated		hsa-mir-30e	down-regulated		hsa-mir-342	up-regulated		hsa-mir-128-2	miRNAup
hsa-mir-500a	down-regulated		hsa-mir-28	up-regulated		hsa-mir-92a-2	up-regulated		hsa-mir-3662	miRNAup
hsa-mir-200a	down-regulated		hsa-mir-26a-2	up-regulated		hsa-mir-320a	up-regulated		hsa-mir-485	miRNAup
hsa-mir-542	down-regulated		hsa-mir-26a-1	up-regulated		hsa-mir-379	up-regulated		hsa-mir-301b	miRNAup
hsa-mir-34a	down-regulated		hsa-mir-22	up-regulated		hsa-mir-93	up-regulated		hsa-mir-409	miRNAup
hsa-mir-320a	down-regulated		hsa-mir-93	up-regulated		hsa-mir-15b	up-regulated		hsa-mir-130b	miRNAup
hsa-mir-193a	down-regulated		hsa-mir-25	up-regulated		hsa-mir-425	up-regulated		hsa-mir-1306	miRNAup
hsa-mir-424	down-regulated		hsa-let-7b	up-regulated		hsa-mir-17	up-regulated		hsa-mir-6510	miRNAup
hsa-mir-660	down-regulated		hsa-mir-26b	up-regulated		hsa-mir-24-1	up-regulated		hsa-mir-203b	miRNAup
hsa-mir-140	down-regulated		hsa-let-7d	up-regulated		hsa-mir-197	up-regulated		hsa-mir-708	miRNAup
hsa-mir-15a	down-regulated		hsa-mir-151a	up-regulated		hsa-mir-24-2	up-regulated		hsa-mir-3691	miRNAup
hsa-let-7f-2	down-regulated		hsa-mir-92a-1	up-regulated		hsa-mir-1307	up-regulated		hsa-mir-654	miRNAup
hsa-let-7f-1	down-regulated		hsa-mir-182	up-regulated		hsa-mir-27a	up-regulated		hsa-mir-323a	miRNAup
hsa-let-7e	down-regulated		hsa-mir-186	up-regulated		hsa-mir-106b	up-regulated		hsa-mir-324	miRNAup
hsa-mir-361	down-regulated		hsa-mir-29a	up-regulated		hsa-mir-378a	up-regulated		hsa-mir-299	miRNAup
hsa-mir-28	up-regulated		hsa-mir-519a-1	up-regulated		hsa-mir-128-1	up-regulated		hsa-mir-758	miRNAup
hsa-mir-27b	up-regulated		hsa-mir-92a-2	up-regulated		hsa-mir-193a	up-regulated		hsa-mir-939	miRNAup
hsa-mir-22	up-regulated		hsa-mir-29c	up-regulated		hsa-mir-20a	up-regulated		hsa-mir-3682	miRNAup
hsa-mir-26b	up-regulated		hsa-mir-378a	up-regulated		hsa-mir-10b	up-regulated		hsa-mir-205	miRNAup
hsa-mir-132	up-regulated		hsa-mir-181a-2	up-regulated		hsa-mir-128-2	up-regulated		hsa-mir-376c	miRNAup
hsa-let-7d	up-regulated		hsa-mir-15b	up-regulated		hsa-mir-744	up-regulated		hsa-mir-944	miRNAup
hsa-mir-27a	up-regulated		hsa-mir-27b	up-regulated		hsa-mir-574	up-regulated		hsa-mir-1249	miRNAup
hsa-mir-23a	up-regulated		hsa-let-7i	up-regulated		hsa-mir-19b-1	up-regulated		hsa-mir-27a	miRNAup
hsa-let-7b	up-regulated		hsa-mir-1307	up-regulated		hsa-mir-484	up-regulated		hsa-mir-767	miRNAup
hsa-mir-26a-2	up-regulated		hsa-mir-23b	up-regulated		hsa-mir-629	up-regulated		hsa-mir-27b	miRNAup
hsa-mir-589	up-regulated		hsa-mir-181a-1	up-regulated		hsa-mir-132	up-regulated		hsa-mir-1910	miRNAup
hsa-mir-26a-1	up-regulated		hsa-mir-17	up-regulated		hsa-mir-19b-2	up-regulated		hsa-mir-105-2	miRNAup
hsa-mir-181a-2	up-regulated		hsa-mir-16-1	up-regulated		hsa-mir-590	up-regulated		hsa-mir-744	miRNAup
hsa-mir-24-1	up-regulated		hsa-mir-16-2	up-regulated		hsa-mir-1976	up-regulated		hsa-mir-411	miRNAup
hsa-mir-24-2	up-regulated		hsa-mir-185	up-regulated		hsa-mir-136	up-regulated		hsa-mir-4652	miRNAup
hsa-mir-186	up-regulated		hsa-mir-19b-2	up-regulated		hsa-mir-324	up-regulated		hsa-mir-5579	miRNAup
hsa-mir-185	up-regulated		hsa-mir-19b-1	up-regulated		hsa-mir-452	up-regulated		hsa-mir-301a	miRNAup
hsa-let-7i	up-regulated		hsa-mir-221	up-regulated		hsa-mir-454	up-regulated		hsa-mir-592	miRNAdown
hsa-mir-23b	up-regulated		hsa-mir-23a	up-regulated		hsa-mir-130a	up-regulated		hsa-mir-34a	miRNAdown
hsa-mir-151a	up-regulated		hsa-mir-29b-2	up-regulated		hsa-mir-455	up-regulated		hsa-mir-10a	miRNAdown
hsa-mir-145	up-regulated		hsa-mir-589	up-regulated		hsa-mir-520a	up-regulated		hsa-mir-4728	miRNAdown
hsa-mir-182	up-regulated		hsa-mir-181b-2	up-regulated		hsa-mir-409	up-regulated		hsa-mir-194-1	miRNAdown
hsa-mir-221	up-regulated		hsa-mir-130a	up-regulated		hsa-mir-758	up-regulated		hsa-mir-202	miRNAdown
hsa-mir-29a	up-regulated		hsa-mir-484	up-regulated		hsa-mir-2355	up-regulated
hsa-mir-128-1	up-regulated		hsa-mir-197	up-regulated		hsa-mir-1306	up-regulated
hsa-mir-148b	up-regulated		hsa-mir-652	up-regulated		hsa-mir-19a	up-regulated
hsa-mir-16-2	up-regulated		hsa-mir-106b	up-regulated		hsa-mir-345	up-regulated
hsa-mir-582	up-regulated		hsa-mir-29b-1	up-regulated		hsa-mir-874	up-regulated
hsa-mir-16-1	up-regulated		hsa-mir-181b-1	up-regulated		hsa-mir-223	up-regulated
hsa-mir-29c	up-regulated		hsa-mir-338	up-regulated		hsa-mir-301a	up-regulated
hsa-mir-328	up-regulated		hsa-mir-139	up-regulated		hsa-mir-584	up-regulated
hsa-mir-181a-1	up-regulated		hsa-mir-27a	up-regulated		hsa-mir-1180	up-regulated
hsa-mir-146b	up-regulated		hsa-mir-148a	up-regulated		hsa-mir-365b	up-regulated
hsa-mir-128-2	up-regulated		hsa-mir-32	up-regulated		hsa-mir-224	up-regulated
hsa-mir-32	up-regulated		hsa-mir-24-1	up-regulated		hsa-mir-365a	up-regulated
hsa-mir-505	up-regulated		hsa-mir-24-2	up-regulated		hsa-mir-381	up-regulated
hsa-mir-139	up-regulated		hsa-mir-132	up-regulated		hsa-mir-550a-2	up-regulated
hsa-mir-150	up-regulated		hsa-mir-365b	up-regulated		hsa-mir-654	up-regulated
hsa-mir-652	up-regulated		hsa-mir-183	up-regulated		hsa-mir-203a	up-regulated
hsa-mir-181b-2	up-regulated		hsa-mir-126	up-regulated		hsa-mir-766	up-regulated
hsa-mir-342	up-regulated		hsa-mir-582	up-regulated		hsa-mir-421	up-regulated
hsa-mir-324	up-regulated		hsa-mir-365a	up-regulated		hsa-mir-598	up-regulated
hsa-mir-29b-2	up-regulated		hsa-mir-142	up-regulated		hsa-mir-33a	up-regulated
hsa-mir-148a	up-regulated		hsa-mir-219a-1	up-regulated		hsa-mir-576	up-regulated
hsa-mir-29b-1	up-regulated		hsa-mir-100	up-regulated		hsa-mir-450a-2	up-regulated
hsa-mir-155	up-regulated		hsa-mir-505	up-regulated		hsa-mir-3614	up-regulated
hsa-mir-183	up-regulated		hsa-mir-222	up-regulated		hsa-mir-708	up-regulated
hsa-mir-193b	up-regulated		hsa-mir-455	up-regulated		hsa-mir-212	up-regulated
hsa-mir-181b-1	up-regulated		hsa-mir-1180	up-regulated		hsa-mir-942	up-regulated
hsa-mir-1287	up-regulated		hsa-mir-150	up-regulated		hsa-mir-485	up-regulated
hsa-mir-338	up-regulated		hsa-mir-128-1	up-regulated		hsa-mir-130b	up-regulated
hsa-mir-3127	up-regulated		hsa-mir-342	up-regulated		hsa-mir-411	up-regulated
hsa-mir-339	up-regulated		hsa-mir-19a	up-regulated		hsa-mir-651	up-regulated
hsa-mir-152	up-regulated		hsa-mir-335	up-regulated		hsa-mir-9-1	up-regulated
hsa-mir-92b	up-regulated		hsa-mir-218-1	up-regulated		hsa-mir-219a-1	up-regulated
hsa-mir-222	up-regulated		hsa-mir-6718	up-regulated		hsa-mir-9-3	up-regulated
hsa-mir-574	up-regulated		hsa-mir-218-2	up-regulated		hsa-mir-9-2	up-regulated
hsa-mir-142	up-regulated		hsa-mir-4746	up-regulated		hsa-mir-154	up-regulated
hsa-mir-301a	up-regulated		hsa-mir-330	up-regulated		hsa-mir-526b	up-regulated
hsa-mir-6718	up-regulated		hsa-mir-128-2	up-regulated		hsa-mir-4772	up-regulated
hsa-mir-126	up-regulated		hsa-mir-339	up-regulated		hsa-mir-296	up-regulated
hsa-mir-590	up-regulated		hsa-mir-497	up-regulated		hsa-mir-450a-1	up-regulated
hsa-mir-381	up-regulated		hsa-mir-452	up-regulated		hsa-mir-323a	up-regulated
hsa-mir-18a	up-regulated		hsa-mir-152	up-regulated		hsa-mir-196b	up-regulated
hsa-mir-4772	up-regulated		hsa-mir-96	up-regulated		hsa-mir-376c	up-regulated
hsa-mir-195	up-regulated		hsa-mir-92b	up-regulated		hsa-mir-188	up-regulated
hsa-mir-210	up-regulated		hsa-mir-223	up-regulated		hsa-mir-377	up-regulated
hsa-mir-769	up-regulated		hsa-mir-3127	up-regulated		hsa-mir-4797	up-regulated
hsa-mir-127	up-regulated		hsa-mir-324	up-regulated		hsa-mir-193b	up-regulated
hsa-mir-96	up-regulated		hsa-mir-3934	up-regulated		hsa-mir-627	up-regulated
hsa-mir-379	up-regulated		hsa-mir-3150b	up-regulated		hsa-mir-4661	up-regulated
hsa-mir-409	up-regulated		hsa-mir-769	up-regulated		hsa-mir-939	up-regulated
hsa-mir-744	up-regulated		hsa-mir-3677	up-regulated		hsa-mir-196a-2	up-regulated
hsa-mir-203a	up-regulated		hsa-mir-410	up-regulated		hsa-mir-6755	up-regulated
hsa-mir-100	up-regulated		hsa-mir-127	up-regulated		hsa-mir-877	up-regulated
hsa-mir-671	up-regulated		hsa-mir-320b-2	up-regulated		hsa-mir-6511b-2	up-regulated
hsa-mir-629	up-regulated		hsa-mir-7-1	up-regulated		hsa-mir-18a	up-regulated
hsa-mir-7-1	up-regulated		hsa-mir-4677	up-regulated		hsa-mir-6854	up-regulated
hsa-mir-337	up-regulated		hsa-mir-576	up-regulated		hsa-mir-329-1	up-regulated
hsa-mir-335	up-regulated		hsa-mir-574	up-regulated		hsa-mir-196a-1	up-regulated
hsa-mir-874	up-regulated		hsa-mir-379	up-regulated		hsa-mir-3150b	up-regulated
hsa-mir-421	up-regulated		hsa-mir-3653	up-regulated		hsa-mir-4461	up-regulated
hsa-mir-4677	up-regulated		hsa-mir-942	up-regulated		hsa-mir-203b	up-regulated
hsa-mir-1301	up-regulated		hsa-mir-590	up-regulated		hsa-mir-4662a	up-regulated
hsa-mir-497	up-regulated		hsa-mir-766	up-regulated		hsa-mir-636	up-regulated
hsa-mir-205	up-regulated		hsa-mir-889	up-regulated		hsa-mir-1271	up-regulated
hsa-mir-199a-2	up-regulated		hsa-mir-491	up-regulated		hsa-mir-3615	up-regulated
hsa-mir-410	up-regulated		hsa-mir-6511b-1	up-regulated		hsa-mir-2277	up-regulated
hsa-mir-2110	up-regulated		hsa-mir-199a-2	up-regulated		hsa-mir-615	up-regulated
hsa-mir-485	up-regulated		hsa-mir-210	up-regulated		hsa-mir-1226	up-regulated
hsa-mir-199a-1	up-regulated		hsa-mir-3065	up-regulated		hsa-mir-3682	up-regulated
hsa-mir-199b	up-regulated		hsa-mir-431	up-regulated		hsa-mir-149	up-regulated
hsa-mir-2355	up-regulated		hsa-mir-200c	up-regulated		hsa-mir-624	up-regulated
hsa-mir-218-1	up-regulated		hsa-mir-199a-1	up-regulated		hsa-mir-4786	up-regulated
hsa-mir-130b	up-regulated		hsa-mir-199b	up-regulated		hsa-mir-299	up-regulated
hsa-mir-218-2	up-regulated		hsa-mir-744	up-regulated		hsa-mir-655	up-regulated
hsa-mir-345	up-regulated		hsa-mir-487b	up-regulated		hsa-mir-3940	up-regulated
hsa-mir-411	up-regulated		hsa-mir-375	up-regulated		hsa-mir-1296	up-regulated
hsa-mir-376c	up-regulated		hsa-mir-376a-1	up-regulated		hsa-mir-376b	up-regulated
hsa-mir-550a-2	up-regulated		hsa-mir-9-3	up-regulated		hsa-mir-3917	up-regulated
hsa-mir-659	up-regulated		hsa-mir-9-2	up-regulated		hsa-mir-95	up-regulated
hsa-mir-369	up-regulated		hsa-mir-9-1	up-regulated		hsa-mir-6510	up-regulated
hsa-mir-331	up-regulated		hsa-mir-671	up-regulated		hsa-mir-570	up-regulated
hsa-mir-431	up-regulated		hsa-mir-629	up-regulated		hsa-mir-937	up-regulated
hsa-mir-4709	up-regulated		hsa-mir-432	up-regulated		hsa-mir-4746	up-regulated
hsa-mir-1306	up-regulated		hsa-mir-301a	up-regulated		hsa-mir-4758	up-regulated
hsa-mir-1271	up-regulated		hsa-mir-380	up-regulated		hsa-mir-579	up-regulated
hsa-mir-134	up-regulated		hsa-mir-655	up-regulated		hsa-mir-5003	up-regulated
hsa-mir-491	up-regulated		hsa-mir-483	up-regulated		hsa-mir-5092	up-regulated
hsa-mir-708	up-regulated		hsa-mir-1301	up-regulated		hsa-mir-205	up-regulated
hsa-mir-138-1	up-regulated		hsa-mir-409	up-regulated		hsa-mir-940	up-regulated
hsa-mir-487a	up-regulated		hsa-mir-224	up-regulated		hsa-mir-548e	up-regulated
hsa-mir-543	up-regulated		hsa-mir-656	up-regulated		hsa-mir-7854	up-regulated
hsa-mir-432	up-regulated		hsa-mir-6511b-2	up-regulated		hsa-mir-1304	up-regulated
hsa-mir-3682	up-regulated		hsa-mir-381	up-regulated		hsa-mir-4652	up-regulated
hsa-mir-141	up-regulated		hsa-mir-628	up-regulated		hsa-mir-1292	up-regulated
hsa-mir-299	up-regulated		hsa-mir-337	up-regulated		hsa-mir-301b	up-regulated
hsa-mir-3065	up-regulated		hsa-mir-217	up-regulated		hsa-mir-1245a	up-regulated
hsa-mir-654	up-regulated		hsa-mir-3610	up-regulated		hsa-mir-1254-2	up-regulated
hsa-mir-4999	up-regulated		hsa-mir-1226	up-regulated		hsa-mir-219b	up-regulated
hsa-mir-136	up-regulated		hsa-mir-550a-1	up-regulated		hsa-mir-3173	up-regulated
hsa-mir-887	up-regulated		hsa-mir-331	up-regulated		hsa-mir-675	up-regulated
hsa-mir-203b	up-regulated		hsa-mir-3615	up-regulated		hsa-mir-618	up-regulated
hsa-mir-516a-2	up-regulated		hsa-mir-188	up-regulated		hsa-mir-4685	up-regulated
hsa-mir-370	up-regulated		hsa-mir-203a	up-regulated		hsa-mir-378d-1	up-regulated
hsa-mir-504	up-regulated		hsa-mir-874	up-regulated		hsa-mir-31	up-regulated
hsa-mir-1249	up-regulated		hsa-mir-193b	up-regulated		hsa-mir-3680-1	up-regulated
hsa-mir-758	up-regulated		hsa-mir-134	up-regulated		hsa-mir-4664	up-regulated
hsa-mir-1228	up-regulated		hsa-mir-550a-3	up-regulated		hsa-mir-137	up-regulated
hsa-mir-3199-2	up-regulated		hsa-mir-2355	up-regulated		hsa-mir-3922	up-regulated
hsa-mir-375	up-regulated		hsa-mir-421	up-regulated		hsa-mir-6803	up-regulated
hsa-mir-493	up-regulated		hsa-mir-4772	up-regulated		hsa-mir-1185-1	up-regulated
hsa-mir-382	up-regulated		hsa-mir-370	up-regulated		hsa-mir-6783	up-regulated
hsa-mir-6842	up-regulated		hsa-mir-138-2	up-regulated		hsa-mir-6875	up-regulated
hsa-mir-3653	up-regulated		hsa-mir-369	up-regulated		hsa-mir-1249	up-regulated
hsa-mir-5001	up-regulated		hsa-mir-940	up-regulated		hsa-mir-944	up-regulated
hsa-mir-212	up-regulated		hsa-mir-499a	up-regulated		hsa-mir-607	up-regulated
hsa-mir-3909	up-regulated		hsa-mir-345	up-regulated		hsa-mir-378d-2	up-regulated
hsa-mir-3610	up-regulated		hsa-mir-543	up-regulated		hsa-mir-3662	up-regulated
hsa-mir-217	up-regulated		hsa-mir-141	up-regulated		hsa-mir-3691	up-regulated
hsa-mir-149	up-regulated		hsa-mir-4661	up-regulated		hsa-mir-105-1	up-regulated
hsa-mir-1262	up-regulated		hsa-mir-7-2	up-regulated		hsa-mir-3187	up-regulated
hsa-mir-4742	up-regulated		hsa-mir-1277	up-regulated		hsa-mir-4640	up-regulated
hsa-mir-214	up-regulated		hsa-mir-485	up-regulated		hsa-mir-5690	up-regulated
hsa-mir-653	up-regulated		hsa-mir-493	up-regulated		hsa-mir-7974	up-regulated
hsa-mir-33a	up-regulated		hsa-mir-18a	up-regulated		hsa-mir-105-2	up-regulated
hsa-mir-6510	up-regulated		hsa-mir-1306	up-regulated		hsa-mir-548f-1	up-regulated
hsa-mir-539	up-regulated		hsa-mir-130b	up-regulated		hsa-mir-767	up-regulated
hsa-mir-376a-2	up-regulated		hsa-mir-7-3	up-regulated		hsa-mir-1538	up-regulated
hsa-mir-33b	up-regulated		hsa-mir-326	up-regulated		hsa-mir-3619	up-regulated
hsa-mir-616	up-regulated		hsa-mir-4662a	up-regulated		hsa-mir-6737	up-regulated
hsa-mir-2277	up-regulated		hsa-mir-550a-2	up-regulated		hsa-mir-658	up-regulated
hsa-mir-377	up-regulated		hsa-mir-376a-2	up-regulated		hsa-mir-4714	up-regulated
hsa-mir-628	up-regulated		hsa-mir-675	up-regulated		hsa-mir-1276	up-regulated
hsa-mir-216a	up-regulated		hsa-mir-877	up-regulated		hsa-mir-4784	up-regulated
hsa-mir-153-1	up-regulated		hsa-mir-147b	up-regulated		hsa-mir-483	up-regulated
hsa-mir-6761	up-regulated		hsa-mir-411	up-regulated		hsa-mir-4713	up-regulated
hsa-mir-154	up-regulated		hsa-mir-136	up-regulated		hsa-mir-548k	up-regulated
hsa-mir-496	up-regulated		hsa-mir-616	up-regulated		hsa-mir-1293	up-regulated
hsa-mir-4444-2	up-regulated		hsa-mir-3909	up-regulated		hsa-mir-6728	up-regulated
hsa-mir-153-2	up-regulated		hsa-mir-1288	up-regulated		hsa-mir-4745	up-regulated
hsa-mir-944	up-regulated		hsa-mir-487a	up-regulated		hsa-mir-5579	up-regulated
hsa-mir-326	up-regulated		hsa-mir-4444-2	up-regulated		hsa-mir-2115	up-regulated
hsa-mir-6854	up-regulated		hsa-mir-376b	up-regulated		hsa-mir-1910	up-regulated
hsa-mir-3605	up-regulated		hsa-mir-1296	up-regulated		hsa-mir-6499	up-regulated
hsa-mir-519a-1	up-regulated		hsa-mir-1262	up-regulated		hsa-mir-1305	up-regulated
hsa-mir-939	up-regulated		hsa-mir-539	up-regulated		hsa-mir-4788	up-regulated
hsa-mir-323a	up-regulated		hsa-mir-376c	up-regulated		hsa-mir-206	up-regulated
hsa-mir-1248	up-regulated		hsa-mir-708	up-regulated
hsa-mir-3651	up-regulated		hsa-mir-4742	up-regulated
hsa-mir-4638	up-regulated		hsa-mir-624	up-regulated
hsa-mir-3064	up-regulated		hsa-mir-3200	up-regulated
hsa-mir-7-3	up-regulated		hsa-mir-3605	up-regulated
hsa-mir-187	up-regulated		hsa-mir-382	up-regulated
hsa-mir-1291	up-regulated		hsa-mir-1292	up-regulated
hsa-mir-184	up-regulated		hsa-mir-577	up-regulated
hsa-mir-627	up-regulated		hsa-mir-654	up-regulated
hsa-mir-1284	up-regulated		hsa-mir-153-2	up-regulated
hsa-mir-545	up-regulated		hsa-mir-758	up-regulated
hsa-mir-219b	up-regulated		hsa-mir-618	up-regulated
hsa-mir-642a	up-regulated		hsa-mir-214	up-regulated
hsa-mir-508	up-regulated		hsa-mir-5001	up-regulated
hsa-mir-556	up-regulated		hsa-mir-1248	up-regulated
hsa-mir-3652	up-regulated		hsa-mir-508	up-regulated
hsa-mir-3691	up-regulated		hsa-mir-6842	up-regulated
hsa-mir-1245a	up-regulated		hsa-mir-1228	up-regulated
hsa-mir-548b	up-regulated		hsa-mir-3199-2	up-regulated
hsa-mir-937	up-regulated		hsa-mir-1271	up-regulated
hsa-mir-3928	up-regulated		hsa-mir-212	up-regulated
hsa-mir-1343	up-regulated		hsa-mir-33a	up-regulated
hsa-mir-551b	up-regulated		hsa-mir-642a	up-regulated
hsa-mir-511	up-regulated		hsa-mir-4640	up-regulated
hsa-mir-4714	up-regulated		hsa-mir-33b	up-regulated
hsa-mir-6720	up-regulated		hsa-mir-205	up-regulated
hsa-mir-3940	up-regulated		hsa-mir-4638	up-regulated
hsa-mir-1255a	up-regulated		hsa-mir-4797	up-regulated
hsa-mir-3130-2	up-regulated		hsa-mir-496	up-regulated
hsa-mir-4449	up-regulated		hsa-mir-2115	up-regulated
hsa-mir-4786	up-regulated		hsa-mir-3682	up-regulated
hsa-mir-301b	up-regulated		hsa-mir-203b	up-regulated
hsa-mir-4444-1	up-regulated		hsa-mir-1304	up-regulated
hsa-mir-3130-1	up-regulated		hsa-mir-5003	up-regulated
hsa-mir-3129	up-regulated		hsa-mir-3619	up-regulated
hsa-mir-34c	up-regulated		hsa-mir-7854	up-regulated
hsa-mir-3157	up-regulated		hsa-mir-556	up-regulated
hsa-mir-5696	up-regulated		hsa-mir-299	up-regulated
hsa-mir-296	up-regulated		hsa-mir-3922	up-regulated
hsa-mir-4762	up-regulated		hsa-mir-511	up-regulated
hsa-mir-4664	up-regulated		hsa-mir-154	up-regulated
hsa-mir-3136	up-regulated		hsa-mir-377	up-regulated
hsa-mir-1537	up-regulated		hsa-mir-570	up-regulated
hsa-mir-935	up-regulated		hsa-mir-4461	up-regulated
hsa-mir-760	up-regulated		hsa-mir-7702	up-regulated
hsa-mir-514a-3	up-regulated		hsa-mir-636	up-regulated
hsa-mir-7702	up-regulated		hsa-mir-187	up-regulated
hsa-mir-581	up-regulated		hsa-mir-149	up-regulated
hsa-mir-514a-1	up-regulated		hsa-mir-3130-2	up-regulated
hsa-mir-605	up-regulated		hsa-mir-6875	up-regulated
hsa-mir-548v	up-regulated		hsa-mir-3136	up-regulated
hsa-mir-548au	up-regulated		hsa-mir-1284	up-regulated
hsa-mir-6728	up-regulated		hsa-mir-153-1	up-regulated
hsa-mir-4707	up-regulated		hsa-mir-3173	up-regulated
hsa-mir-3662	up-regulated		hsa-mir-5683	up-regulated
hsa-mir-323b	up-regulated		hsa-mir-6783	up-regulated
hsa-mir-3609	up-regulated		hsa-mir-6852	up-regulated
hsa-mir-514a-2	up-regulated		hsa-mir-3651	up-regulated
hsa-mir-3174	up-regulated		hsa-mir-2277	up-regulated
hsa-mir-3140	up-regulated		hsa-mir-3130-1	up-regulated
hsa-mir-549a	up-regulated		hsa-mir-323a	up-regulated
hsa-mir-137	up-regulated		hsa-mir-6510	up-regulated
hsa-mir-4791	up-regulated		hsa-mir-548e	up-regulated
hsa-mir-1910	up-regulated		hsa-mir-3652	up-regulated
hsa-mir-579	up-regulated		hsa-mir-939	up-regulated
hsa-mir-6820	up-regulated		hsa-mir-6854	up-regulated
hsa-mir-509-3	up-regulated		hsa-mir-34c	up-regulated
hsa-mir-4652	up-regulated		hsa-mir-5696	up-regulated
hsa-mir-4443	up-regulated		hsa-mir-3928	up-regulated
hsa-mir-129-2	up-regulated		hsa-mir-4791	up-regulated
hsa-mir-5579	up-regulated		hsa-mir-4444-1	up-regulated
hsa-mir-509-2	up-regulated		hsa-mir-449a	up-regulated
hsa-mir-4491	up-regulated		hsa-mir-3199-1	up-regulated
hsa-mir-4687	up-regulated		hsa-mir-6720	up-regulated
hsa-mir-767	up-regulated		hsa-mir-3157	up-regulated
hsa-mir-552	up-regulated		hsa-mir-3176	up-regulated
hsa-mir-4766	up-regulated		hsa-mir-627	up-regulated
hsa-mir-509-1	up-regulated		hsa-mir-4685	up-regulated
hsa-mir-129-1	up-regulated		hsa-mir-605	up-regulated
hsa-mir-551a	up-regulated		hsa-mir-1255a	up-regulated
hsa-mir-449a	up-regulated		hsa-mir-3174	up-regulated
hsa-mir-34b	up-regulated		hsa-mir-3129	up-regulated
hsa-mir-105-2	up-regulated		hsa-mir-4449	up-regulated
hsa-mir-105-1	up-regulated		hsa-mir-548v	up-regulated
hsa-mir-489	up-regulated		hsa-mir-545	up-regulated
hsa-mir-891a	up-regulated		hsa-mir-1249	up-regulated
hsa-mir-190b	up-regulated		hsa-mir-3187	up-regulated
hsa-mir-5698	up-regulated		hsa-mir-1537	up-regulated
hsa-mir-3920	up-regulated		hsa-mir-3620	up-regulated
hsa-mir-5090	up-regulated		hsa-mir-3684	up-regulated
hsa-mir-1269a	up-regulated		hsa-mir-323b	up-regulated
hsa-mir-5571	up-regulated		hsa-mir-1343	up-regulated
			hsa-mir-581	up-regulated
			hsa-mir-4443	up-regulated
			hsa-mir-4707	up-regulated
			hsa-mir-6781	up-regulated
			hsa-mir-760	up-regulated
			hsa-mir-509-3	up-regulated
			hsa-mir-296	up-regulated
			hsa-mir-3680-1	up-regulated
			hsa-mir-219b	up-regulated
			hsa-mir-937	up-regulated
			hsa-mir-1245a	up-regulated
			hsa-mir-6798	up-regulated
			hsa-mir-3940	up-regulated
			hsa-mir-4786	up-regulated
			hsa-mir-944	up-regulated
			hsa-mir-551a	up-regulated
			hsa-mir-1293	up-regulated
			hsa-mir-509-1	up-regulated
			hsa-mir-6737	up-regulated
			hsa-mir-6499	up-regulated
			hsa-mir-509-2	up-regulated
			hsa-mir-4784	up-regulated
			hsa-mir-301b	up-regulated
			hsa-mir-7155	up-regulated
			hsa-mir-548au	up-regulated
			hsa-mir-1276	up-regulated
			hsa-mir-1305	up-regulated
			hsa-mir-5698	up-regulated
			hsa-mir-3691	up-regulated
			hsa-mir-4745	up-regulated
			hsa-mir-34b	up-regulated
			hsa-mir-1224	up-regulated
			hsa-mir-129-2	up-regulated
			hsa-mir-4664	up-regulated
			hsa-mir-7974	up-regulated
			hsa-mir-935	up-regulated
			hsa-mir-6820	up-regulated
			hsa-mir-548k	up-regulated
			hsa-mir-129-1	up-regulated
			hsa-mir-7112	up-regulated
			hsa-mir-549a	up-regulated
			hsa-mir-579	up-regulated
			hsa-mir-4687	up-regulated
			hsa-mir-4766	up-regulated
			hsa-mir-137	up-regulated
			hsa-mir-3140	up-regulated
			hsa-mir-3662	up-regulated
			hsa-mir-4652	up-regulated
			hsa-mir-4714	up-regulated
			hsa-mir-4491	up-regulated
			hsa-mir-891a	up-regulated
			hsa-mir-4713	up-regulated
			hsa-mir-1269a	up-regulated
			hsa-mir-190b	up-regulated
			hsa-mir-548f-1	up-regulated
			hsa-mir-6728	up-regulated
			hsa-mir-767	up-regulated
			hsa-mir-4788	up-regulated
			hsa-mir-105-1	up-regulated
			hsa-mir-105-2	up-regulated
			hsa-mir-1910	up-regulated
			hsa-mir-5571	up-regulated
			hsa-mir-7641-1	up-regulated
			hsa-mir-5579	up-regulated
			hsa-mir-5092	up-regulated

## Sheet: Sheet4 Methylated genes
Former smoker vs non-smoker			Current smoker vs non-smoker			Current smoker vs former smoker			Intersection
Gene	Type		Gene	Type		Gene	Type		Gene	Type
AC003682.17	down-regulated		ATP1B3P1	down-regulated		AC008686.1	down-regulated		TUBD1	up-regulated
MIR4500HG	down-regulated		RP11-628E19.2	down-regulated		ATP1B3P1	down-regulated		ABALON	up-regulated
STK26	down-regulated		AC003682.17	down-regulated		ITFG1-AS1	down-regulated		CTA-31J9.2	up-regulated
WDR45	down-regulated		LINC00533	down-regulated		RP11-264J4.10	down-regulated		FAM110C	up-regulated
APEX2	down-regulated		MIR4500HG	down-regulated		CTB-35F21.2	down-regulated		LRRK2	up-regulated
CTC-444N24.13	down-regulated		STK26	down-regulated		RNU6-560P	down-regulated		NUDT16P1	up-regulated
AP001525.1	down-regulated		SMAD5-AS1_2	down-regulated		AL662797.1	down-regulated		LINC01579	up-regulated
CXorf40A	down-regulated		WDR45	down-regulated		NUDT7	down-regulated		CCDC18	up-regulated
RP11-628E19.2	down-regulated		MIR3663	down-regulated		MGC45922	down-regulated		AC004540.4	up-regulated
RP3-323P24.3	down-regulated		APEX2	down-regulated		RP11-456K23.1	down-regulated		SLC51B	up-regulated
ATG4A	down-regulated		LINC01560	down-regulated		HIST1H2BH	down-regulated		MPC2	up-regulated
BRCC3	down-regulated		ATG4A	down-regulated		CTB-35F21.3	down-regulated		AC106876.2	up-regulated
LINC01560	down-regulated		RP3-323P24.3	down-regulated		MIR6872	down-regulated		GPR135	up-regulated
RP1-315G1.3	down-regulated		CXorf40A	down-regulated		CMB9-22P13.1	down-regulated		GNS	up-regulated
RP2	down-regulated		RP1-315G1.3	down-regulated		HSPA1A	down-regulated		FBXL5	up-regulated
NAP1L2	down-regulated		BRCC3	down-regulated		CTD-2194D22.3	down-regulated		RP11-274J7.3	up-regulated
TMSB4X	down-regulated		ULK4P3	down-regulated		HIST1H2AG	down-regulated		PLA2G10	up-regulated
RP11-761E20.1	down-regulated		MIR200C	down-regulated		HIST1H3J	down-regulated		KLHDC2	up-regulated
UBQLN2	down-regulated		NAP1L2	down-regulated		SLC36A4	down-regulated		NR2F2	up-regulated
UPF3B	down-regulated		RP2	down-regulated		AC129492.6	down-regulated		RP11-521D12.1	up-regulated
SMAD5-AS1_2	down-regulated		MAGEH1	down-regulated		CTD-2529P6.4	down-regulated		CD14	up-regulated
SNX12	down-regulated		AP001525.1	down-regulated		NEUROG2	down-regulated		RP11-150O12.3	up-regulated
CTD-2044J15.1	down-regulated		RP1-35C21.1	down-regulated		SOX21	down-regulated		OCLN	up-regulated
CCDC22	down-regulated		CTD-2044J15.1	down-regulated		RP13-766D20.4	down-regulated		RP3-414A15.10	up-regulated
LINC00533	down-regulated		MSANTD3-TMEFF1	down-regulated		AC092933.4	down-regulated		AC002480.5	up-regulated
INGX	down-regulated		UPF3B	down-regulated		AC023669.1	down-regulated		RP11-108O10.2	up-regulated
RP11-364B14.3	down-regulated		TMSB4X	down-regulated		RP11-453A12.1	down-regulated		RAB4A	up-regulated
MAGEH1	down-regulated		SNX12	down-regulated		HIST1H3G	down-regulated		SLC25A20	up-regulated
CTD-2537O9.1	down-regulated		RP11-1070N10.4	down-regulated		RP11-1C8.4	down-regulated		ZSCAN31	up-regulated
GNL3L	down-regulated		RP4-555D20.4	down-regulated		RP11-473M20.16	down-regulated		RP4-586O15.1	up-regulated
RP11-554D14.1	down-regulated		AC068535.2	down-regulated		AL049822.1	down-regulated		PIK3R1	up-regulated
RP13-314C10.5	down-regulated		RP5-1172N10.2	down-regulated		NPM3	down-regulated		TGFB1I1	up-regulated
MID1IP1	down-regulated		WBP5	down-regulated		RP11-324C10.1	down-regulated		SHOX2	up-regulated
TIMM8A	down-regulated		BEX5	down-regulated		CSTA	down-regulated		AC107016.1	up-regulated
SYP	down-regulated		CHRDL1	down-regulated		MIR6889	down-regulated		B4GALT5	up-regulated
BEX5	down-regulated		RP4-555D20.3	down-regulated		MIR200C	down-regulated		CTD-3057O21.1	up-regulated
HMGB3	down-regulated		POU3F2	down-regulated		HCG4	down-regulated		RP11-136K7.1	up-regulated
WDR44	down-regulated		CCDC22	down-regulated		PIK3IP1-AS1	down-regulated		ZNF697	up-regulated
FANCB	down-regulated		CTB-96E2.10	down-regulated		HIST1H3B	down-regulated		AC022173.2	up-regulated
FAM120C	down-regulated		RP11-554D14.1	down-regulated		CTD-2168K21.2	down-regulated		RP11-231E6.1	up-regulated
PRRG1	down-regulated		UBQLN2	down-regulated		DSC3	down-regulated		RP5-888M10.2	up-regulated
CD99L2	down-regulated		RP11-761E20.1	down-regulated		RP11-255G12.3	down-regulated		AC007950.2	up-regulated
PQBP1	down-regulated		RP11-283I3.2	down-regulated		GRPEL2-AS1	down-regulated		PSPH	up-regulated
MIR3663	down-regulated		CMTM3	down-regulated		EFS	down-regulated		TMEM127	up-regulated
RP4-555D20.3	down-regulated		CHST7	down-regulated		GSTO1	down-regulated		RERG	up-regulated
CHRDL1	down-regulated		CTSW	down-regulated		CD70	down-regulated		ATP13A3	up-regulated
RP5-1172N10.2	down-regulated		MID1IP1	down-regulated		RP11-876N24.2	down-regulated		CNN3	up-regulated
GLRX3P2	down-regulated		TIMM8A	down-regulated		ANKRD18B	down-regulated		CXCL8	up-regulated
RAP2C	down-regulated		WDR44	down-regulated		UHRF2	down-regulated		PLS1	up-regulated
RPS6KA6	down-regulated		BEX4	down-regulated		GAS1	down-regulated		HPS3	up-regulated
KIF4A	down-regulated		RP4-575N6.4	down-regulated		MAFB	down-regulated		RP11-242O24.3	up-regulated
PGK1	down-regulated		GNL3L	down-regulated		GSC2	down-regulated		REV1	up-regulated
LDOC1	down-regulated		RP13-314C10.5	down-regulated		HCG4B	down-regulated		AC016831.7	up-regulated
RP11-710C12.1	down-regulated		INGX	down-regulated		SEPT4-AS1	down-regulated		G0S2	up-regulated
FAM133A	down-regulated		RP11-346D14.1	down-regulated		SLC6A15	down-regulated		MIR6787	up-regulated
AC003005.2	down-regulated		RP11-456K23.1	down-regulated		RP11-433J22.3	down-regulated		RP11-15K2.2	up-regulated
RP11-527D7.1	down-regulated		LINC00621	down-regulated		ZDBF2	down-regulated		RP11-110L15.1	up-regulated
RP4-555D20.4	down-regulated		KIF4A	down-regulated		CSE1L-AS1	down-regulated		PPARA	up-regulated
TRAM1L1	down-regulated		RP11-364B14.3	down-regulated		RP1-35C21.1	down-regulated		HGD	up-regulated
RPL10	down-regulated		CD99L2	down-regulated		TRBV5-7	down-regulated		CD81	up-regulated
DACH2	down-regulated		RAP2C	down-regulated		CTC-441N14.4	down-regulated		AC010525.1	up-regulated
BX842568.4	down-regulated		SYP	down-regulated		RP11-598F7.6	down-regulated		CYP4A22-AS1	up-regulated
BEX4	down-regulated		AL662797.1	down-regulated		ZNF658	down-regulated		RP11-443B7.1	up-regulated
RP11-283I3.2	down-regulated		CTD-2168K21.2	down-regulated		PCBP1	down-regulated		TTPA	up-regulated
RAB39A	down-regulated		PQBP1	down-regulated		CTC-308K20.1	down-regulated		CES1P1	up-regulated
AC068535.2	down-regulated		FAM120C	down-regulated		RNU6-193P	down-regulated		SELENBP1	up-regulated
HTATSF1	down-regulated		LINC01322	down-regulated		SLC16A10	down-regulated		HCAR1	up-regulated
ATP6AP2	down-regulated		TBC1D8B	down-regulated		MIR4425	down-regulated		RP11-685M7.5	down-regulated
NKAPP1	down-regulated		HMGB3	down-regulated		MIR205	down-regulated		CPNE4	down-regulated
TBC1D8B	down-regulated		PRRG1	down-regulated		FAM45A	down-regulated		CNGA3	down-regulated
OCRL	down-regulated		PGK1	down-regulated		POLD4	down-regulated		CTD-2206N4.4	down-regulated
RP11-1070N10.4	down-regulated		KAL1	down-regulated		HIST2H2AA4	down-regulated		DUS3L	down-regulated
SLC10A3	down-regulated		PTENP1	down-regulated		PANO1	down-regulated		CYCSP40	down-regulated
FAM127B	down-regulated		FAM127B	down-regulated		NPBWR1	down-regulated		INTS1	down-regulated
NDUFB11	down-regulated		RPL10	down-regulated		CTF1	down-regulated		HPCA	down-regulated
PDK3	down-regulated		CTC-241F20.4	down-regulated		HOXA11-AS	down-regulated		CELA1	down-regulated
WBP5	down-regulated		ATP6AP2	down-regulated		LINC01509	down-regulated		KDM4B	down-regulated
SCML1	down-regulated		MGC45922	down-regulated		RP11-521D12.2	down-regulated		ACAD11	down-regulated
CMTM3	down-regulated		CTD-2194D22.3	down-regulated		RP1-7G5.6	down-regulated		HP	down-regulated
CHST7	down-regulated		MIR6825	down-regulated		AIM1	down-regulated		NENF	down-regulated
ULK4P3	down-regulated		FANCB	down-regulated		PAPL	down-regulated		FETUB	down-regulated
FAM199X	down-regulated		KCTD8	down-regulated		SP8	down-regulated		CADPS2	down-regulated
LAGE3	down-regulated		CTC-255N20.1	down-regulated		INSM2	down-regulated		RP3-402G11.28	down-regulated
TSR2	down-regulated		HELT	down-regulated		RP11-486L19.2	down-regulated		LINC01063	down-regulated
RP11-521O16.1	down-regulated		CTD-2001E22.1	down-regulated		MPDU1	down-regulated		EDDM3B	down-regulated
CTC-255N20.1	down-regulated		TXLNB	down-regulated		KIFC2	down-regulated		LRRC16B	down-regulated
LONRF3	down-regulated		HTATSF1	down-regulated		RP11-632K5.3	down-regulated		BAIAP3	down-regulated
CXCR4	down-regulated		GPR101	down-regulated		MIR193A	down-regulated		SNCA	down-regulated
PHKA2	down-regulated		RPS6KA6	down-regulated		APC	down-regulated		HN1	down-regulated
SLC9A7	down-regulated		LONRF3	down-regulated		MIR542	down-regulated		RP11-439H13.2	down-regulated
ZC4H2	down-regulated		LDOC1	down-regulated		RP11-116N8.1	down-regulated		ACER3	down-regulated
LINC00621	down-regulated		OCRL	down-regulated		RP3-465N24.5	down-regulated		TBC1D24	down-regulated
KCTD8	down-regulated		NEUROG2	down-regulated		AP001046.5	down-regulated		AC092117.1	down-regulated
POU3F2	down-regulated		RP11-219E7.3	down-regulated		RP11-216L13.21	down-regulated		CTNNA1	down-regulated
RP1-35C21.1	down-regulated		NDUFB11	down-regulated		BOLA2B	down-regulated		MFGE8	down-regulated
AC067968.3	down-regulated		AC073218.1	down-regulated		AC243836.1	down-regulated		TRBV2	down-regulated
CXorf40B	down-regulated		FAM133A	down-regulated		RP11-131L23.1	down-regulated		ZHX2	down-regulated
MCTS1	down-regulated		CTD-2537O9.1	down-regulated		ADPGK-AS1	down-regulated		OR10H5	down-regulated
AC053503.2	down-regulated		SNCA	down-regulated		HIST1H4I	down-regulated		LRRC26	down-regulated
GAB3	down-regulated		GAB3	down-regulated		RP11-114H24.6	down-regulated		BPIFA3	down-regulated
GPR101	down-regulated		SLC6A15	down-regulated		RP13-463N16.6	down-regulated		NR2F6	down-regulated
ZNF804B	down-regulated		GLRX3P2	down-regulated		RP11-330O11.3	down-regulated		LINC01020	down-regulated
AC005808.3	down-regulated		KLHL4	down-regulated		TMEM191C	down-regulated		RNA5SP19	down-regulated
ZNF449	down-regulated		SLC10A3	down-regulated		AC004980.8	down-regulated		ADAM8	down-regulated
KAL1	down-regulated		CTD-2269F5.1	down-regulated		HSPB6	down-regulated		SIGLEC5	down-regulated
LINC01224	down-regulated		CD70	down-regulated		FZD10	down-regulated		HCN4	down-regulated
AC061961.2	down-regulated		NKAPP1	down-regulated		NRARP	down-regulated		RP11-575F12.2	down-regulated
NOVA1	down-regulated		SCML1	down-regulated		PTBP3	down-regulated		RP11-256P1.1	down-regulated
RFX6	down-regulated		LAGE3	down-regulated		HOXD11	down-regulated		MPEG1	down-regulated
SCML2	down-regulated		PDK3	down-regulated		CTB-133G6.2	down-regulated		SRM	down-regulated
RP11-469L4.1	down-regulated		NPY	down-regulated		LINC00498	down-regulated		DUS1L	down-regulated
KRBOX4	down-regulated		CHIC1	down-regulated		RPL39L	down-regulated		USP50	down-regulated
IL13RA1	down-regulated		RP11-521O16.1	down-regulated		TMEM191A	down-regulated		TLK2	down-regulated
TRMT2B	down-regulated		AC003005.2	down-regulated		RP11-804H8.7	down-regulated		TTC9B	down-regulated
RP11-219E7.3	down-regulated		FAM199X	down-regulated		FZD8	down-regulated		WDR11-AS1	down-regulated
PTENP1	down-regulated		AC092933.4	down-regulated		CYTH2	down-regulated		SLIT2	down-regulated
AC003001.1	down-regulated		RP3-425P12.5	down-regulated		PYCARD	down-regulated		MLYCD	down-regulated
ATRX	down-regulated		TRAM1L1	down-regulated		DIO3	down-regulated		ADAMTS7	down-regulated
TRAV24	down-regulated		DACH2	down-regulated		RPPH1-2P	down-regulated		RFX2	down-regulated
OTUD5	down-regulated		MCTS1	down-regulated		TXLNB	down-regulated		RP11-77K12.7	down-regulated
ZNF804A	down-regulated		SCML2	down-regulated		RP11-98J9.2	down-regulated		FHL3	down-regulated
GABRA2	down-regulated		TSR2	down-regulated		POU3F1	down-regulated		STX18-AS1	down-regulated
CHIC1	down-regulated		VIM	down-regulated		RNA5SP38	down-regulated		AC009505.4	down-regulated
USP27X	down-regulated		AC005808.3	down-regulated		AC005786.5	down-regulated		BPIFA2	down-regulated
IDH3G	down-regulated		SLC9A7	down-regulated		RP11-566K11.4	down-regulated		TTF2	down-regulated
ZMYM3	down-regulated		AC007750.5	down-regulated		FAM197Y4	down-regulated		ATOH1	down-regulated
RNF180	down-regulated		TRBV23-1	down-regulated		AC016747.3	down-regulated		NEDD4	down-regulated
WDR17	down-regulated		RP11-159H10.3	down-regulated		RNU6-784P	down-regulated		CCDC137	down-regulated
AC019011.1	down-regulated		SEPT4-AS1	down-regulated		SNCA	down-regulated		PPAP2C	down-regulated
CTSW	down-regulated		CXCR4	down-regulated		RP11-21C4.1	down-regulated		RP11-379B8.1	down-regulated
DPY19L2	down-regulated		AC000099.1	down-regulated		OTOL1	down-regulated		ESYT3	down-regulated
TRAV35	down-regulated		CXorf40B	down-regulated		CYCSP40	down-regulated		ARL4C	down-regulated
KCNV1	down-regulated		AC108051.1	down-regulated		GCSAM	down-regulated		RNU6-1088P	down-regulated
RP11-159H10.3	down-regulated		TMEM255A	down-regulated		HIST1H2AE	down-regulated		HECW2	down-regulated
G6PD	down-regulated		RP5-1031D4.3	down-regulated		AKR1C6P	down-regulated		EPS8L1	down-regulated
ZDHHC9	down-regulated		PHKA2	down-regulated		TSPY17P	down-regulated		KRT24	down-regulated
CTD-2269F5.1	down-regulated		ZNF449	down-regulated		CHST4	down-regulated		CTA-228A9.4	down-regulated
ZCCHC12	down-regulated		TRMT2B	down-regulated		MARVELD1	down-regulated		CNTF	down-regulated
LINC01278	down-regulated		NOVA1	down-regulated		PTHLH	down-regulated		TEX28	down-regulated
NUP62CL	down-regulated		BX842568.4	down-regulated		CTC-526N19.1	down-regulated		VPS9D1	down-regulated
UBE2A	down-regulated		ZNF233	down-regulated		TMEM109	down-regulated		MAD1L1	down-regulated
TMEM185A	down-regulated		AC003001.1	down-regulated		C1QTNF3-AMACR	down-regulated		EIF5A2	down-regulated
AC004012.1	down-regulated		LINC00086	down-regulated		TMEM54	down-regulated		PPP1R12C	down-regulated
SLITRK3	down-regulated		RP11-462G12.2	down-regulated		RP11-527L4.2	down-regulated		ELP3	down-regulated
RP11-713M15.2	down-regulated		AC002368.4	down-regulated		LINC01359	down-regulated		AC004637.1	down-regulated
FOXO4	down-regulated		AC004012.1	down-regulated		UBXN6	down-regulated		GTF3C2	down-regulated
SLC46A3	down-regulated		LINC01556	down-regulated		RP11-666A20.3	down-regulated		CTD-2194D22.4	down-regulated
AC000099.1	down-regulated		IL13RA1	down-regulated		LINC00239	down-regulated		PRR14	down-regulated
LINC01556	down-regulated		MIR4425	down-regulated		TACSTD2	down-regulated		FBXL19	down-regulated
CITED1	down-regulated		RP11-25K21.6	down-regulated		AF038458.3	down-regulated		RP11-452C8.1	down-regulated
LINC00086	down-regulated		ATRX	down-regulated		FRMD6-AS2	down-regulated		RP11-80H5.2	down-regulated
CTD-2001E22.1	down-regulated		AC007326.9	down-regulated		GNB4	down-regulated		AC005838.2	down-regulated
AC002368.4	down-regulated		RP11-469L4.1	down-regulated		TINCR	down-regulated		CAPN13	down-regulated
AC073218.1	down-regulated		KRBOX4	down-regulated		LDHB	down-regulated		MYO3A	down-regulated
IGBP1	down-regulated		PTPLAD2	down-regulated		RP11-96D1.7	down-regulated		SNPH	down-regulated
HELT	down-regulated		AC053503.2	down-regulated		AC078883.4	down-regulated		NUBP1	down-regulated
ZBTB33	down-regulated		IDH3G	down-regulated		KRT17	down-regulated		SPNS2	down-regulated
RP11-462G12.2	down-regulated		PQLC2L	down-regulated		RP11-776H12.1	down-regulated		NPEPL1	down-regulated
EMX2OS	down-regulated		RFX6	down-regulated		AC005363.9	down-regulated		JAM2	down-regulated
LINC01159	down-regulated		AF196972.9	down-regulated		SNORD13	down-regulated		OTOGL	down-regulated
TMEM47	down-regulated		G6PD	down-regulated		NKX2-8	down-regulated		SLC41A3	down-regulated
RP4-575N6.4	down-regulated		HIST1H4K	down-regulated		SNAI2	down-regulated		RP11-169K17.3	down-regulated
APLN	down-regulated		INSM2	down-regulated		BAAT	down-regulated		NUTM2A-AS1	down-regulated
ZNF730	down-regulated		ZCCHC12	down-regulated		RP11-155G15.3	down-regulated		AC091814.2	down-regulated
NPY	down-regulated		CTD-3194G12.2	down-regulated		RP11-379B8.1	down-regulated		RP4-764D2.1	down-regulated
RP11-417O18.2	down-regulated		OTUD5	down-regulated		LTF	down-regulated		PLCE1	down-regulated
AC007326.9	down-regulated		GABRA2	down-regulated		MIR6875	down-regulated		GNAL	down-regulated
RP5-842K16.2	down-regulated		ZDHHC9	down-regulated		AP002490.1	down-regulated		STK32C	down-regulated
RP11-15D14.2	down-regulated		FAM179B	down-regulated		AC016543.1	down-regulated		RAB40B	down-regulated
AC108051.1	down-regulated		RP11-148B6.2	down-regulated		XRCC3	down-regulated		CYP2C19	down-regulated
KLHL4	down-regulated		CSTA	down-regulated		RP11-114B7.6	down-regulated		AC096574.5	down-regulated
FGF13	down-regulated		USP27X	down-regulated		RP5-902P8.12	down-regulated		SLC6A15	down-regulated
AF196972.9	down-regulated		ZMYM3	down-regulated		AC010745.2	down-regulated		UGT2B10	down-regulated
AC104135.2	down-regulated		RP11-216L13.21	down-regulated		AC002310.14	down-regulated		ASCL5	down-regulated
TRBV23-1	down-regulated		TMEM185A	down-regulated		CIDEA	down-regulated		CTD-2269F5.1	down-regulated
MED12	down-regulated		ZC4H2	down-regulated		AC005522.7	down-regulated		CTC-250I14.1	down-regulated
MIR6825	down-regulated		PAK7	down-regulated		CALML3	down-regulated		FCGBP	down-regulated
DDIT4L	down-regulated		TRAV35	down-regulated		XXyac-YX65C7_A.3	down-regulated		GTSF1L	down-regulated
ARMCX5	down-regulated		FOXO4	down-regulated		AC093673.5	down-regulated		OR13D1	down-regulated
TCEAL8	down-regulated		TRAV24	down-regulated		MIR942	down-regulated		RP11-280O1.2	down-regulated
GPR149	down-regulated		ULK4P2	down-regulated		CTD-2142D14.1	down-regulated		RP11-14P20.1	down-regulated
AC007750.5	down-regulated		RP11-69M1.3	down-regulated		TSPY10	down-regulated		GNAO1	down-regulated
EPHA5	down-regulated		EMX2OS	down-regulated		RP11-661A12.5	down-regulated		MAP1LC3B	down-regulated
FMR1	down-regulated		TBX21	down-regulated		PLA2G12AP1	down-regulated		MYL10	down-regulated
LRFN5	down-regulated		AC104135.2	down-regulated		PXN-AS1	down-regulated		SYT7	down-regulated
DOK5	down-regulated		SLITRK3	down-regulated		CLRN1-AS1	down-regulated		ROPN1L	down-regulated
MAP7D3	down-regulated		ANKRD18DP	down-regulated		MVB12A	down-regulated		CHST2	down-regulated
SAMSN1	down-regulated		MAP7D3	down-regulated		RP11-672L10.3	down-regulated		TMEM259	down-regulated
AC005597.1	down-regulated		GABRA4	down-regulated		ACTR3	down-regulated		CTD-2331C18.5	down-regulated
ZNF233	down-regulated		RP11-713M15.2	down-regulated		IFITM1	down-regulated		KIF25-AS1	down-regulated
PAK7	down-regulated		NAALAD2	down-regulated		RP11-474I11.7	down-regulated		OR10A4	down-regulated
SOWAHD	down-regulated		FGF13	down-regulated		JAM2	down-regulated		PDE7B	down-regulated
PQLC2L	down-regulated		NUP62CL	down-regulated		OGFRP1	down-regulated		MIR942	down-regulated
AC012462.1	down-regulated		RP11-378A12.1	down-regulated		LINC01564	down-regulated		PPP3CB	down-regulated
RP11-378A12.1	down-regulated		UBE2A	down-regulated		C6orf226	down-regulated		CTRC	down-regulated
RP11-371M22.1	down-regulated		AC104655.3	down-regulated		RP11-478K15.6	down-regulated		MSH4	down-regulated
CTC-270D5.2	down-regulated		IGBP1	down-regulated		RP11-452L6.1	down-regulated		PPFIA2	down-regulated
TXLNB	down-regulated		KCNV1	down-regulated		ATP6V0C	down-regulated		ACE3P	down-regulated
MAP3K15	down-regulated		AC067968.3	down-regulated		C19orf53	down-regulated		SRD5A1	down-regulated
TMEM255A	down-regulated		AC012462.1	down-regulated		RNA5SP19	down-regulated		LINC00299	down-regulated
ADAMTS19	down-regulated		AC097468.7	down-regulated		TTC9B	down-regulated		AC124944.5	down-regulated
GABRA1	down-regulated		CITED1	down-regulated		RPS20P35	down-regulated		ZNF415	down-regulated
LPPR4	down-regulated		GSTM2	down-regulated		CIDEB	down-regulated		LINC00466	down-regulated
RP11-288A5.2	down-regulated		RP11-96D1.7	down-regulated		MIR320A	down-regulated		SBK1	down-regulated
ABCB1	down-regulated		LINC01278	down-regulated		YBX3	down-regulated		CRMP1	down-regulated
RAB33A	down-regulated		RP11-81A1.6	down-regulated		PPTC7	down-regulated		FRG2FP	down-regulated
GDI1	down-regulated		RP11-324C10.1	down-regulated		ALDH3A1	down-regulated		RAC3	down-regulated
EDNRB	down-regulated		APLN	down-regulated		HP	down-regulated		CTD-2231E14.4	down-regulated
PPM1E	down-regulated		PNPLA5	down-regulated		AC135724.1	down-regulated		SPSB1	down-regulated
RP11-328P23.3	down-regulated		FOXI3	down-regulated		TPRKB	down-regulated		RMST	down-regulated
MTM1	down-regulated		SNAI2	down-regulated		KRT5	down-regulated		COLGALT1	down-regulated
RBAK-RBAKDN	down-regulated		RP5-1047A19.6	down-regulated		IL23A	down-regulated		SLC24A3	down-regulated
NR0B1	down-regulated		ZBTB33	down-regulated		RP11-346C20.4	down-regulated		C11orf96	down-regulated
TFE3	down-regulated		RP11-15D14.2	down-regulated		RP11-439H13.2	down-regulated		MIR3617	down-regulated
GS1-421I3.2	down-regulated		RP5-842K16.2	down-regulated		CTD-3094K11.1	down-regulated		SUN5	down-regulated
MAGED1	down-regulated		UNCX	down-regulated		CCDC64B	down-regulated		CTD-2647L4.4	down-regulated
VN1R4	down-regulated		SELV	down-regulated		RP11-362A9.3	down-regulated		HTRA4	down-regulated
SNCA	down-regulated		MED12	down-regulated		PLEKHO1	down-regulated		ESPNP	down-regulated
RP11-148B6.2	down-regulated		WDR17	down-regulated		AC023855.1	down-regulated		KRT75	down-regulated
ARAF	down-regulated		RP11-180D21.3	down-regulated		FAM89B	down-regulated		AVP	down-regulated
NKRF	down-regulated		AC005597.1	down-regulated		MIR3124	down-regulated		PPP3CB-AS1	down-regulated
NKAP	down-regulated		RP11-105N13.4	down-regulated		HECTD1	down-regulated		CTD-2349P21.6	down-regulated
TBX21	down-regulated		GSC2	down-regulated		RP5-1047A19.6	down-regulated		REC114	down-regulated
FAM218A	down-regulated		PPFIA2	down-regulated		AC011286.1	down-regulated		RNU6-520P	down-regulated
MSANTD3-TMEFF1	down-regulated		PTHLH	down-regulated		AC007191.4	down-regulated		VSTM2L	down-regulated
RGS7BP	down-regulated		ARMCX5	down-regulated		PCDHB3	down-regulated		MIR135A2	down-regulated
FOXI3	down-regulated		RP11-21C4.1	down-regulated		BPIFA3	down-regulated		ACYP2	down-regulated
AL121578.2	down-regulated		GS1-421I3.2	down-regulated		S100A2	down-regulated		TMEM45A	down-regulated
SOX14	down-regulated		WNK3	down-regulated		RP11-752G15.8	down-regulated		CYFIP1	down-regulated
AC003009.1	down-regulated		CTD-2501M5.1	down-regulated		ARPC5L	down-regulated		SEPT4-AS1	down-regulated
RP5-1031D4.3	down-regulated		SPATA41	down-regulated		ADAM28	down-regulated		PQLC2L	down-regulated
MAGT1	down-regulated		MAP3K15	down-regulated		RP11-442J21.2	down-regulated		AP001625.4	down-regulated
RP13-379O24.3	down-regulated		RP11-321L2.1	down-regulated		CTD-2587H24.5	down-regulated		RALGAPA2	down-regulated
PCDH11Y	down-regulated		RP11-42A4.1	down-regulated		ACTRT3	down-regulated		SNAPC4	down-regulated
CUL4B	down-regulated		LINC00967	down-regulated		MIR6805	down-regulated		ANO1	down-regulated
RBM3	down-regulated		JAM2	down-regulated		AC007365.3	down-regulated		CERS1	down-regulated
MAGIX	down-regulated		RAB33A	down-regulated		LRRC26	down-regulated		FER1L4	down-regulated
MPP1	down-regulated		TTC9B	down-regulated		CTD-2231E14.4	down-regulated		AK9	down-regulated
BRINP3	down-regulated		SOWAHD	down-regulated		OR1J4	down-regulated		IQCG	down-regulated
PAK3	down-regulated		GDAP1L1	down-regulated		CTD-2256P15.1	down-regulated		RP11-89K10.1	down-regulated
RP11-180D21.3	down-regulated		NEUROG3	down-regulated		CEL	down-regulated		AC007128.1	down-regulated
RP11-105N13.4	down-regulated		TMEM47	down-regulated		SOX21-AS1	down-regulated		ADA	down-regulated
BHLHE23	down-regulated		RP11-209M4.1	down-regulated		RALGAPA2	down-regulated		ELOVL4	down-regulated
GABRG1	down-regulated		ZNF804A	down-regulated		NDUFA4L2	down-regulated		ICK	down-regulated
NEGR1	down-regulated		RP11-328P23.3	down-regulated		TFAP2A	down-regulated		PHLPP1	down-regulated
ELF4	down-regulated		GPR149	down-regulated		FZD7	down-regulated		CTD-2538A21.1	down-regulated
AC074363.1	down-regulated		TCEAL8	down-regulated		GGN	down-regulated		RP5-856G1.1	down-regulated
BCORL1	down-regulated		C11orf96	down-regulated		SOWAHC	down-regulated		CTD-2192J16.20	down-regulated
PHF8	down-regulated		BHLHE23	down-regulated		CTB-181H17.1	down-regulated		ACTL6B	down-regulated
GPR139	down-regulated		GABRA1	down-regulated		CTD-2207P18.2	down-regulated		PIWIL4	down-regulated
CTD-3194G12.2	down-regulated		EPHA5	down-regulated		CDIP1	down-regulated		C9orf84	down-regulated
PRDX4	down-regulated		ADM2	down-regulated		TCAF2	down-regulated		AUNIP	down-regulated
ZXDA	down-regulated		PTX3	down-regulated		ANKLE1	down-regulated		TMEM71	down-regulated
PIGA	down-regulated		MAGIX	down-regulated		RNU6-244P	down-regulated		RP3-402G11.26	down-regulated
ABCB7	down-regulated		CTD-2587H24.10	down-regulated		RP11-654D12.2	down-regulated		DLX3	down-regulated
OR2M7	down-regulated		ELF4	down-regulated		C10orf55	down-regulated		RP5-1098D14.1	down-regulated
RBMX	down-regulated		IGLON5	down-regulated		CPA3	down-regulated		GLRX5	down-regulated
CTB-96E2.10	down-regulated		FGD1	down-regulated		AC084809.2	down-regulated		GABRA4	down-regulated
RP3-462D8.2	down-regulated		ETV1	down-regulated		RP11-285F7.2	down-regulated		ZSWIM7	down-regulated
NAALAD2	down-regulated		RP11-371M22.1	down-regulated		MORN5	down-regulated		EXOG	down-regulated
MTMR8	down-regulated		AC003009.1	down-regulated		PRKAA2	down-regulated		NRBP2	down-regulated
GSTM2	down-regulated		NR0B1	down-regulated		NR2F6	down-regulated		MGC15885	down-regulated
CTA-38K21.2	down-regulated		GDI1	down-regulated		EAF1	down-regulated		UBIAD1	down-regulated
HMGCLL1	down-regulated		MIR106A	down-regulated		RP11-1275H24.2	down-regulated		RP11-148B3.1	down-regulated
GABRA4	down-regulated		KCNA1	down-regulated		CTD-2587H24.10	down-regulated		CTD-2587H24.10	down-regulated
USP11	down-regulated		SNAP25	down-regulated		HOPX	down-regulated		CCDC71	down-regulated
AC004051.2	down-regulated		PPM1E	down-regulated		LINC01063	down-regulated		CTC1	down-regulated
SNAP25	down-regulated		ZNF804B	down-regulated		RP11-153K11.3	down-regulated		ARHGAP42P2	down-regulated
KCNN2	down-regulated		PAK3	down-regulated		AC009014.3	down-regulated		JOSD2	down-regulated
TSPAN6	down-regulated		ARHGDIB	down-regulated		RP11-572N21.1	down-regulated		SPOCD1	down-regulated
MEOX2	down-regulated		PWRN1	down-regulated		URAHP	down-regulated		ITGA5	down-regulated
RP11-276H19.1	down-regulated		CEMP1	down-regulated		CTD-2619J13.23	down-regulated		ABHD17AP4	down-regulated
PBDC1	down-regulated		MAP6	down-regulated		SUN5	down-regulated		ITGA3	down-regulated
RP11-158J3.2	down-regulated		RP4-745E8.2	down-regulated		AC021205.1	down-regulated		AC004471.10	down-regulated
ATP6AP1	down-regulated		HMGCLL1	down-regulated		RP11-546B8.6	down-regulated		KRTAP5-2	down-regulated
ULK4P2	down-regulated		HAPLN2	down-regulated		AC002454.1	down-regulated		HIST3H3	down-regulated
SLC5A7	down-regulated		MCF2	down-regulated		TPBG	down-regulated		PIWIL3	down-regulated
MCF2	down-regulated		RP11-470C13.4	down-regulated		EFHD1	down-regulated		ADH5	down-regulated
LY96	down-regulated		MAGT1	down-regulated		RP11-145M4.1	down-regulated		AF127936.9	down-regulated
CTD-2006K23.2	down-regulated		RP11-661A12.5	down-regulated		RP11-123B3.2	down-regulated		AC009501.4	down-regulated
RP4-745E8.2	down-regulated		SOX14	down-regulated		RP3-340B19.3	down-regulated		LSM4	down-regulated
NEUROG3	down-regulated		DSC3	down-regulated		CTD-2538A21.1	down-regulated		RP11-386M24.9	down-regulated
CTD-2501M5.1	down-regulated		OR5B17	down-regulated		RP11-667K14.9	down-regulated		LDHAL6A	down-regulated
PPP1R3F	down-regulated		IRS4	down-regulated		MTO1	down-regulated		TJP3	down-regulated
LAMP2	down-regulated		EDNRB	down-regulated		C9orf43	down-regulated		MICALL1	down-regulated
RP11-25K21.6	down-regulated		TFE3	down-regulated		LINC00424	down-regulated		ZNF137P	down-regulated
SPATA41	down-regulated		C20orf166-AS1	down-regulated		RP11-148B3.1	down-regulated		ZNF414	down-regulated
NELL1	down-regulated		CHST2	down-regulated		C9orf84	down-regulated		KIAA0319L	down-regulated
PPFIA2	down-regulated		RP11-255G12.3	down-regulated		RP11-209M4.1	down-regulated		CTB-181H17.1	down-regulated
PCDH11X	down-regulated		GABRG1	down-regulated		RP11-213H15.1	down-regulated		RP1-228P16.5	down-regulated
OR5B17	down-regulated		MAGED1	down-regulated		MT2A	down-regulated		AC022431.2	down-regulated
PNPLA5	down-regulated		RPS14P8	down-regulated		SLC16A12	down-regulated		AVL9	down-regulated
GABRA6	down-regulated		TRAV3	down-regulated		SYNGR3	down-regulated		DCST1	down-regulated
IRS4	down-regulated		MSC	down-regulated		PKP1	down-regulated		SDSL	down-regulated
RPL39	down-regulated		NKRF	down-regulated		AC067960.1	down-regulated		RP11-616M22.11	down-regulated
PREX2	down-regulated		NEGR1	down-regulated		FRMD7	down-regulated		KIAA0513	down-regulated
RP11-1094M14.10	down-regulated		ZXDA	down-regulated		AL139288.1	down-regulated		RP11-366H4.1	down-regulated
BEX2	down-regulated		RP11-114B7.6	down-regulated		TAGLN	down-regulated		CEACAM5	down-regulated
BX842568.1	down-regulated		AC074363.1	down-regulated		KLF14	down-regulated		TMEM181	down-regulated
IGLON5	down-regulated		CTD-2142D14.1	down-regulated		AOX1	down-regulated		MINPP1	down-regulated
FGD1	down-regulated		PLEKHO1	down-regulated		RP11-61K9.3	down-regulated		HS6ST1	down-regulated
VIM	down-regulated		RP11-288A5.2	down-regulated		SMCR2	down-regulated		CABIN1	down-regulated
CTD-2247C11.1	down-regulated		PPP1R3F	down-regulated		HSD17B1	down-regulated		AMDHD1	down-regulated
FAAH2	down-regulated		ARAF	down-regulated		XXbac-BPGBPG55C20.1	down-regulated		CATSPERB	down-regulated
RP11-357H14.17	down-regulated		AC099754.1	down-regulated		TMEM71	down-regulated		DGKA	down-regulated
C12orf42	down-regulated		FAM218A	down-regulated		AC018804.1	down-regulated		RP11-428J1.4	down-regulated
APCS	down-regulated		RBAK-RBAKDN	down-regulated		AP000936.4	down-regulated		RP11-465K1.2	down-regulated
GEMIN8	down-regulated		FMR1	down-regulated		SS18	down-regulated		NEURL4	down-regulated
CRISPLD1	down-regulated		ELMOD1	down-regulated		NPHP1	down-regulated		SHANK2	down-regulated
CXCL12	down-regulated		RBMX	down-regulated		C18orf21	down-regulated		CACNG1	down-regulated
WNK3	down-regulated		MPP1	down-regulated		C10orf91	down-regulated		ZNF668	down-regulated
AC113618.1	down-regulated		CUL4B	down-regulated		RPP25	down-regulated		CTD-2142D14.1	down-regulated
IGKV6D-41	down-regulated		RPL39	down-regulated		CTD-2296D1.4	down-regulated		PREX1	down-regulated
KCNA1	down-regulated		AC113618.1	down-regulated		CIART	down-regulated		MAPKBP1	down-regulated
CRISP2	down-regulated		RSPO4	down-regulated		MRPL57	down-regulated		RP1-35C21.1	down-regulated
BTK	down-regulated		NKX2-2-AS1	down-regulated		RP1-230L10.1	down-regulated		N6AMT2	down-regulated
GRIN3A	down-regulated		RBM3	down-regulated		RP11-7F17.7	down-regulated		CRB1	down-regulated
HTR1B	down-regulated		AC131951.1	down-regulated		C10orf67	down-regulated		CTD-2544N14.3	down-regulated
FSTL5	down-regulated		AC116614.1	down-regulated		AC006947.1	down-regulated		KHDC3L	down-regulated
CTD-2089N3.3	down-regulated		BEX2	down-regulated		PIGM	down-regulated		CELA2A	down-regulated
TRAV8-1	down-regulated		BCORL1	down-regulated		AC091814.2	down-regulated		CTD-2616J11.11	down-regulated
ZNF234	down-regulated		LPPR4	down-regulated		C5orf52	down-regulated		AGAP5	down-regulated
UPRT	down-regulated		MYOD1	down-regulated		RP11-138H8.3	down-regulated		RANBP20P	down-regulated
TRBV4-2	down-regulated		NKAP	down-regulated		RP11-1094M14.7	down-regulated		USP20	down-regulated
DOCK11	down-regulated		PAPL	down-regulated		RP11-732A19.9	down-regulated		ABL2	down-regulated
NCAM2	down-regulated		MTM1	down-regulated		RP11-1L9.1	down-regulated		FCGR2B	down-regulated
SLC6A15	down-regulated		ABCB1	down-regulated		CEP19	down-regulated		B3GNT9	down-regulated
MAP6	down-regulated		OR1J4	down-regulated		MIR4724	down-regulated		MUC3A	down-regulated
PWRN1	down-regulated		GAD2	down-regulated		KIF25-AS1	down-regulated		FLYWCH1	down-regulated
TRAV8-4	down-regulated		OVAAL	down-regulated		EIF5A	down-regulated		AC005618.9	down-regulated
UNCX	down-regulated		FAT4	down-regulated		FAM197Y9	down-regulated		AC009133.17	down-regulated
C20orf166-AS1	down-regulated		RP11-390N6.1	down-regulated		RP4-564M11.2	down-regulated		PTHLH	down-regulated
GDAP1L1	down-regulated		RNA5SP243	down-regulated		RP13-941N14.1	down-regulated		XRCC6	down-regulated
AC099754.1	down-regulated		OTOL1	down-regulated		RP11-552F3.10	down-regulated		AC009237.13	down-regulated
AF196970.3	down-regulated		SUN5	down-regulated		HMGB2	down-regulated		RP11-174G6.1	down-regulated
RP11-742D12.2	down-regulated		BARHL1	down-regulated		RP11-161M6.2	down-regulated		FZD7	down-regulated
LINC00643	down-regulated		SP8	down-regulated		GBP6	down-regulated		DGKZ	down-regulated
CTC-559E9.4	down-regulated		AC009505.4	down-regulated		PLEK2	down-regulated		SUMO3	down-regulated
RP11-69M1.3	down-regulated		DDIT4L	down-regulated		ITGA5	down-regulated		XXyac-YX65C7_A.2	down-regulated
TMEM72	down-regulated		IGKC	down-regulated		PAX8-AS1	down-regulated		AL450992.2	down-regulated
RP11-321L2.1	down-regulated		C12orf42	down-regulated		ARHGAP42P2	down-regulated		AGK	down-regulated
ZDHHC15	down-regulated		ATOH1	down-regulated		KRTCAP3	down-regulated		INSM2	down-regulated
GPR151	down-regulated		TMEM200B	down-regulated		RP11-269F19.2	down-regulated		AC055736.1	down-regulated
RP11-430H10.1	down-regulated		MIR1283-1	down-regulated		RP1-159A19.4	down-regulated		CTC-228N24.2	down-regulated
RIMS4	down-regulated		TMEM130	down-regulated		NFX1	down-regulated		SSR4P1	down-regulated
AC097468.7	down-regulated		PREX2	down-regulated		RAP2B	down-regulated		TNFAIP1	down-regulated
FCER1A	down-regulated		PRDX4	down-regulated		GPR62	down-regulated		SRCIN1	down-regulated
NKX6-2	down-regulated		CTD-2523D13.1	down-regulated		ILF2	down-regulated		NDUFB10	down-regulated
SPIN3	down-regulated		AC005537.2	down-regulated		FAM103A1	down-regulated		CACNA1D	down-regulated
SH3KBP1	down-regulated		THEGL	down-regulated		NAA20	down-regulated		LMAN2	down-regulated
MSC	down-regulated		PHF8	down-regulated		ARF6	down-regulated		CACNB4	down-regulated
ETV1	down-regulated		LINC01012	down-regulated		AP4B1	down-regulated		BPIFA1	down-regulated
DDX26B	down-regulated		CXCL12	down-regulated		TCTA	down-regulated		RP11-209M4.1	down-regulated
TRIM51HP	down-regulated		CTD-2616J11.11	down-regulated		AC011648.1	down-regulated		BRAT1	down-regulated
RP11-1079K10.5	down-regulated		BRINP3	down-regulated		HIST1H2AM	down-regulated		GYPB	down-regulated
SELV	down-regulated		SLC46A3	down-regulated		AC113189.5	down-regulated		RP3-340N1.6	down-regulated
PTX3	down-regulated		LRFN5	down-regulated		ALDH7A1	down-regulated		OXER1	down-regulated
DBX2	down-regulated		RP11-489D6.2	down-regulated		PITX3	down-regulated		PKN1	down-regulated
NUDT10	down-regulated		RORB	down-regulated		MYCBPAP	down-regulated		AC021205.1	down-regulated
C11orf96	down-regulated		RP1-310O13.13	down-regulated		FAM92A1	down-regulated		CD3G	down-regulated
ITM2A	down-regulated		NUDT10	down-regulated		AQP5	down-regulated		AC024560.2	down-regulated
AC131951.1	down-regulated		CTA-38K21.2	down-regulated		RP11-22P6.2	down-regulated		CFHR2	down-regulated
CTD-2523D13.1	down-regulated		GPR139	down-regulated		MIRLET7BHG	down-regulated		RP11-167H9.5	down-regulated
OLFM3	down-regulated		RNA5SP175	down-regulated		RP11-678G14.4	down-regulated		RP11-678G14.4	down-regulated
RP11-390N6.1	down-regulated		PBDC1	down-regulated		PDE4DIP	down-regulated		VOPP1	down-regulated
GPR50	down-regulated		ACTL6B	down-regulated		DSC2	down-regulated		RP11-543D5.2	down-regulated
TRBV4-1	down-regulated		SEC14L5	down-regulated		PROK2	down-regulated		PPP1R18	down-regulated
EGR4	down-regulated		EGR4	down-regulated		AC137723.1	down-regulated		RELN	down-regulated
KCNT2	down-regulated		OR1E1	down-regulated		ZMAT5	down-regulated		TESC	down-regulated
FRMD3	down-regulated		RP11-301L8.2	down-regulated		RP11-407B7.1	down-regulated		SHKBP1	down-regulated
CNKSR2	down-regulated		RP11-766H1.1	down-regulated		SMG5	down-regulated		TMEM101	down-regulated
RP11-433J20.1	down-regulated		VN1R4	down-regulated		CYP1B1	down-regulated		RP11-403I13.7	down-regulated
MAGEE1	down-regulated		TRAV8-1	down-regulated		KRT6A	down-regulated		PAK1	down-regulated
MIR519D	down-regulated		BTK	down-regulated		AKIRIN2	down-regulated		IZUMO4	down-regulated
CDH10	down-regulated		VENTX	down-regulated		CTD-2521M24.6	down-regulated		SYNGAP1	down-regulated
RP5-1027O11.1	down-regulated		RP11-576D8.4	down-regulated		TREML1	down-regulated		DYSF	down-regulated
RP11-893F2.15	down-regulated		OR9Q2	down-regulated		RP11-173M1.5	down-regulated		PLEKHO1	down-regulated
CTC-459F4.3	down-regulated		MAB21L1	down-regulated		KRT24	down-regulated		MIB2	down-regulated
OVAAL	down-regulated		ZDHHC15	down-regulated		LINC01020	down-regulated		C10orf120	down-regulated
RSPO4	down-regulated		CYCSP40	down-regulated		GJB2	down-regulated		C4orf27	down-regulated
OR9Q2	down-regulated		RP1-225E12.2	down-regulated		EXOC1	down-regulated		FRY-AS1	down-regulated
FTSJ1	down-regulated		APCS	down-regulated		GOLGA7B	down-regulated		RP11-216L13.21	down-regulated
RAI2	down-regulated		GHR	down-regulated		ELOVL4	down-regulated		TP73-AS1	down-regulated
VWDE	down-regulated		TSPAN6	down-regulated		MIR203A	down-regulated		TLE2	down-regulated
RP11-473E2.4	down-regulated		CEACAM5	down-regulated		LINC01132	down-regulated		CTC-554D6.1	down-regulated
C10orf53	down-regulated		CNKSR2	down-regulated		IER2	down-regulated		LINC00639	down-regulated
IGHV7-81	down-regulated		GCSAM	down-regulated		MSGN1	down-regulated		OR1J2	down-regulated
PCDH19	down-regulated		DYNAP	down-regulated		CKB	down-regulated		RP11-123B3.2	down-regulated
ELMOD1	down-regulated		USP11	down-regulated		ACTA2-AS1	down-regulated		CORO1C	down-regulated
SHISA9	down-regulated		HOXA11-AS	down-regulated		GPC2	down-regulated		FUOM	down-regulated
RP11-520P18.5	down-regulated		SLC5A7	down-regulated		RAB27B	down-regulated		RP11-404E16.1	down-regulated
C18orf42	down-regulated		HBM	down-regulated		DTX3	down-regulated		TEX2	down-regulated
REG1P	down-regulated		RP11-603J24.17	down-regulated		ZNF415	down-regulated		SLC17A4	down-regulated
CD1D	down-regulated		ANKRD63	down-regulated		P2RX6	down-regulated		RP13-941N14.1	down-regulated
HAPLN2	down-regulated		AC004051.2	down-regulated		CPAMD8	down-regulated		OTOL1	down-regulated
ZMAT1	down-regulated		NR2F6	down-regulated		LINC00551	down-regulated		SPERT	down-regulated
TIGD5	down-regulated		NKX6-2	down-regulated		RP11-289I10.2	down-regulated		C3orf70	down-regulated
LINC01366	down-regulated		ATP6AP1	down-regulated		RP3-399L15.2	down-regulated		RP1-159A19.4	down-regulated
RP4-765H13.1	down-regulated		AL121578.2	down-regulated		IQCJ	down-regulated		ATP2A3	down-regulated
ST6GALNAC5	down-regulated		CIDEA	down-regulated		LINC01389	down-regulated		RWDD2B	down-regulated
RP11-763E3.1	down-regulated		RP11-763E3.1	down-regulated		RP11-486O12.2	down-regulated		RP11-511B23.2	down-regulated
MIR1283-1	down-regulated		TRBV4-1	down-regulated		DDIT4	down-regulated		RP11-885B4.1	down-regulated
SLC26A4	down-regulated		CADM3	down-regulated		RPS21P8	down-regulated		DKK3	down-regulated
KIR3DX1	down-regulated		AC091814.2	down-regulated		RP1-178F10.1	down-regulated		TNFSF11	down-regulated
CHST2	down-regulated		PIGA	down-regulated		AGBL2	down-regulated		ENTPD1-AS1	down-regulated
DUXAP3	down-regulated		ABCB7	down-regulated		ZNF668	down-regulated		MIRLET7B	down-regulated
HPYR1	down-regulated		THY1	down-regulated		RPL30	down-regulated		CPNE6	down-regulated
AC005537.2	down-regulated		GPR151	down-regulated		CAMK4	down-regulated		DNM2	down-regulated
TBX18	down-regulated		RP11-256I23.3	down-regulated		CNBP	down-regulated		ANKLE1	down-regulated
AC104655.3	down-regulated		MIR150	down-regulated		VAMP5	down-regulated		YIF1A	down-regulated
AMMECR1	down-regulated		FAAH2	down-regulated		ACTL6B	down-regulated		RP11-285C1.2	down-regulated
MRGPRX2	down-regulated		TRIM67	down-regulated		EPS8L1	down-regulated		AC131056.3	down-regulated
AC116614.1	down-regulated		AKR1C6P	down-regulated		OR1E1	down-regulated		RP11-96D1.7	down-regulated
THY1	down-regulated		CRISP2	down-regulated		RBBP5	down-regulated		AKR1C6P	down-regulated
TRHDE	down-regulated		MIR205	down-regulated		SP1	down-regulated		WFDC8	down-regulated
RP11-458K10.1	down-regulated		MRGPRX2	down-regulated		PRR14	down-regulated		FAM181A	down-regulated
AC013269.3	down-regulated		RP11-1094M14.10	down-regulated		CTD-2315E11.1	down-regulated		SOBP	down-regulated
RP11-760D2.12	down-regulated		RP11-598F7.6	down-regulated		ALOX15	down-regulated		HMCN2	down-regulated
PRKCG	down-regulated		CSE1L-AS1	down-regulated		CPT1C	down-regulated		TXLNB	down-regulated
OR2T11	down-regulated		TMEM72	down-regulated		PSMG3	down-regulated		HCRT	down-regulated
LINC00967	down-regulated		SAMSN1	down-regulated		RNF135	down-regulated		PLEKHA6	down-regulated
GABRB1	down-regulated		REG1P	down-regulated		ARL4D	down-regulated		FBXL13	down-regulated
CADM3	down-regulated		FCER1A	down-regulated		AC106782.20	down-regulated		RP11-661A12.5	down-regulated
OR2T3	down-regulated		MAGEE1	down-regulated		MIR210	down-regulated		SYNGR1	down-regulated
OR10J5	down-regulated		MEOX2	down-regulated		SIGLEC5	down-regulated		CDK3	down-regulated
TBL1X	down-regulated		LY96	down-regulated		MRPS31P5	down-regulated		CYP1B1	down-regulated
RORB	down-regulated		UNC5CL	down-regulated		TTF2	down-regulated		ZBTB17	down-regulated
CXorf56	down-regulated		MIR6511A2	down-regulated		NTMT1	down-regulated		RP11-6I2.3	down-regulated
GIMAP2	down-regulated		LLNLR-304G9.1	down-regulated		RP11-1J11.1	down-regulated		PANX1	down-regulated
RP5-1047A19.6	down-regulated		CHST4	down-regulated		AC005540.3	down-regulated		FABP7	down-regulated
CHMP1B2P	down-regulated		RGS7BP	down-regulated		RNLS	down-regulated		FBXL6	down-regulated
FAT4	down-regulated		LINC01307	down-regulated		MYL10	down-regulated		PRAM1	down-regulated
TSPYL2	down-regulated		GPR50	down-regulated		MAP1LC3B	down-regulated		GJA1	down-regulated
CD300E	down-regulated		RP11-465L10.10	down-regulated		RELN	down-regulated		OR1E1	down-regulated
DCC	down-regulated		TM6SF1	down-regulated		TCF4	down-regulated		AC006130.3	down-regulated
RP5-945F2.3	down-regulated		PCDH11Y	down-regulated		NRIP3	down-regulated		TMEM222	down-regulated
RP3-425P12.5	down-regulated		OR2AT4	down-regulated		LYZL1	down-regulated		YEATS2	down-regulated
OR4A47	down-regulated		OLFM3	down-regulated		RP11-273G15.2	down-regulated		TRO	down-regulated
GAD2	down-regulated		TIGD5	down-regulated		MIR3180-4	down-regulated		CCNG2	down-regulated
C8orf34	down-regulated		GALR1	down-regulated		ANKRD36C	down-regulated		SCRG1	down-regulated
MYOD1	down-regulated		RAI2	down-regulated		CTD-3239E11.2	down-regulated		HECTD4	down-regulated
PCSK2	down-regulated		MIR519E	down-regulated		RAB1B	down-regulated		AC008073.7	down-regulated
ADM2	down-regulated		COMP	down-regulated		C8orf82	down-regulated		TXNRD2	down-regulated
TRAV3	down-regulated		OR10J5	down-regulated		TNFSF11	down-regulated		RP11-71L14.3	down-regulated
ZNF215	down-regulated		RP3-462D8.2	down-regulated		CD109	down-regulated		RIMS3	down-regulated
EMB	down-regulated		TRAV8-4	down-regulated		ATOX1	down-regulated		CCDC86	down-regulated
TRDV1	down-regulated		LRRC26	down-regulated		FZD2	down-regulated		XRRA1	down-regulated
OGT	down-regulated		RP11-1079K10.5	down-regulated		HIST1H1A	down-regulated		H1FX-AS1	down-regulated
SNRPGP16	down-regulated		TCN1	down-regulated		DKK3	down-regulated		RP11-289I10.2	down-regulated
AMER1	down-regulated		GS1-72M22.1	down-regulated		CTD-2168K21.1	down-regulated		RGR	down-regulated
RP11-460B17.3	down-regulated		RP11-486O13.2	down-regulated		RP11-221J22.1	down-regulated		LINC01132	down-regulated
TCEAL3	down-regulated		GSX1	down-regulated		CTD-2616J11.11	down-regulated		AC092684.1	down-regulated
LILRP2	down-regulated		GSTO1	down-regulated		ADA	down-regulated		ADPRHL1	down-regulated
IGHD1-14	down-regulated		RP13-379O24.3	down-regulated		RP11-452C8.1	down-regulated		DIS3L2	down-regulated
CALCR	down-regulated		RP11-520P18.5	down-regulated		RP11-12J10.3	down-regulated		DNM3	down-regulated
ZNF569	down-regulated		RNU6-1088P	down-regulated		CTD-2647L4.4	down-regulated		CTD-3222D19.2	down-regulated
AC003005.4	down-regulated		RNASE3	down-regulated		PLEKHH3	down-regulated		MYH15	down-regulated
SLC16A2	down-regulated		PCDH19	down-regulated		LAMA3	down-regulated		CRYAA	down-regulated
OFD1	down-regulated		SLC26A4	down-regulated		SRSF10	down-regulated		S100A4	down-regulated
SEMG1	down-regulated		FRMD3	down-regulated		SLC25A39	down-regulated		LINC00551	down-regulated
PEX5L	down-regulated		DUXAP3	down-regulated		CYP2A13	down-regulated		ANXA8L1	down-regulated
NELL2	down-regulated		LAMP2	down-regulated		AC009505.4	down-regulated		RP11-831H9.11	down-regulated
AC013480.1	down-regulated		RP5-1027O11.1	down-regulated		ZBED3	down-regulated		RALA	down-regulated
CTC-523E23.14	down-regulated		CTD-2647L4.4	down-regulated		HN1	down-regulated		PRB1	down-regulated
CCDC63	down-regulated		CTD-2247C11.1	down-regulated		RP11-392O1.4	down-regulated		PARP10	down-regulated
VWC2	down-regulated		VGF	down-regulated		DAPP1	down-regulated		ABAT	down-regulated
AC012501.2	down-regulated		SOX3	down-regulated		WNT2B	down-regulated		TRIM54	down-regulated
SEPT4-AS1	down-regulated		FZD7	down-regulated		FABP5	down-regulated		GBP6	down-regulated
RP11-576D8.4	down-regulated		RP11-128M1.1	down-regulated		RP11-575F12.2	down-regulated		RPL14P1	down-regulated
CRH	down-regulated		DMRT2	down-regulated		RP11-702B10.2	down-regulated		CTD-3051D23.3	down-regulated
OR2M3	down-regulated		RPS26P49	down-regulated		RP11-543D5.2	down-regulated		CTD-3099C6.7	down-regulated
FAM127C	down-regulated		GRIN3A	down-regulated		METTL2B	down-regulated		HSF1	down-regulated
RP11-489D6.2	down-regulated		CTC-523E23.14	down-regulated		AC004854.4	down-regulated		ATF6	down-regulated
SYT9	down-regulated		SHH	down-regulated		IGFBP6	down-regulated		EFCAB2	down-regulated
RPS14P8	down-regulated		NXPH3	down-regulated		CTB-161M19.4	down-regulated		RAD51D	down-regulated
RXFP3	down-regulated		MEF2B	down-regulated		RPL32P31	down-regulated		OR1J4	down-regulated
RP11-368M16.7	down-regulated		KIF25-AS1	down-regulated		CTD-2129N1.1	down-regulated		PLD3	down-regulated
MAGED2	down-regulated		ARHGAP42P2	down-regulated		NIPAL3	down-regulated		KLHL17	down-regulated
CDH7	down-regulated		IGHV3OR15-7	down-regulated		SPPL2A	down-regulated		AC023590.1	down-regulated
SYT6	down-regulated		PCDH11X	down-regulated		MGAT1	down-regulated		APBB1IP	down-regulated
AC018730.4	down-regulated		NDUFA4L2	down-regulated		AC073610.5	down-regulated		ARHGAP40	down-regulated
LINC00906	down-regulated		AK4P5	down-regulated		RP5-856G1.1	down-regulated		RP5-1047A19.6	down-regulated
LINC01012	down-regulated		AF196970.3	down-regulated		SHISA2	down-regulated		AC004901.1	down-regulated
RP11-768F21.1	down-regulated		ELOVL4	down-regulated		AC055736.1	down-regulated
RP5-1024C24.1	down-regulated		INSM1	down-regulated		SVOP	down-regulated
WAS	down-regulated		NCF4	down-regulated		AC064834.2	down-regulated
RP11-209M4.1	down-regulated		SYT6	down-regulated		PITX1	down-regulated
AK4P5	down-regulated		TRBV4-2	down-regulated		FAXDC2	down-regulated
ROPN1	down-regulated		CCDC178	down-regulated		EIF5A2	down-regulated
TMEM130	down-regulated		MT3	down-regulated		ISG20L2	down-regulated
RP11-30J20.1	down-regulated		CCDC63	down-regulated		FBXL13	down-regulated
AP006261.1	down-regulated		AC013269.3	down-regulated		FBXL8	down-regulated
SLC25A25-AS1	down-regulated		CALCR	down-regulated		CASC2	down-regulated
RP11-656G20.1	down-regulated		KCNN2	down-regulated		RP11-513G11.2	down-regulated
LINC01586	down-regulated		ZDBF2	down-regulated		KRT15	down-regulated
CACNA1G-AS1	down-regulated		C3P1	down-regulated		NUTM2A-AS1	down-regulated
DYNAP	down-regulated		BEX1	down-regulated		TRBV2	down-regulated
CERKL	down-regulated		CTD-2231E14.4	down-regulated		NOS2P3	down-regulated
RP11-301L8.2	down-regulated		GABRA6	down-regulated		TMEM134	down-regulated
CTNND2	down-regulated		MUC3A	down-regulated		HPCA	down-regulated
RP11-96D1.7	down-regulated		GIF	down-regulated		ZNF638	down-regulated
LL0XNC01-116E7.2	down-regulated		SH3KBP1	down-regulated		UTP20	down-regulated
SORCS3	down-regulated		ATP12A	down-regulated		CCDC86	down-regulated
THEGL	down-regulated		NELL1	down-regulated		C19orf60	down-regulated
FGF4	down-regulated		OR10A4	down-regulated		FER	down-regulated
RP11-548K12.5	down-regulated		GSTA4	down-regulated		CCT6B	down-regulated
UBL4A	down-regulated		AF038458.3	down-regulated		ALG1L3P	down-regulated
ZNF221	down-regulated		AC018730.4	down-regulated		MAP1LC3B2	down-regulated
ARHGEF9	down-regulated		HPYR1	down-regulated		IZUMO4	down-regulated
CD33	down-regulated		EIF5A2	down-regulated		OR10A4	down-regulated
GALR1	down-regulated		MIR6805	down-regulated		RP3-523C21.2	down-regulated
F13A1	down-regulated		PCSK2	down-regulated		C9orf172	down-regulated
ZNF615	down-regulated		CLRN1-AS1	down-regulated		HPCAL4	down-regulated
OR2T2	down-regulated		SLIT2	down-regulated		C16orf70	down-regulated
CCDC178	down-regulated		RP11-453A12.1	down-regulated		ROPN1L	down-regulated
HS3ST4	down-regulated		RP11-266L9.5	down-regulated		RASSF1	down-regulated
TCN1	down-regulated		DDX26B	down-regulated		RP11-174G6.1	down-regulated
LY6H	down-regulated		AC008060.8	down-regulated		GABRA4	down-regulated
FGF20	down-regulated		RNU6-653P	down-regulated		RP3-402G11.25	down-regulated
SIGLEC12	down-regulated		F13A1	down-regulated		XPNPEP2	down-regulated
ACSL4	down-regulated		RP13-941N14.1	down-regulated		MPZL1	down-regulated
AVPR1B	down-regulated		FTSJ1	down-regulated		SHKBP1	down-regulated
AC011242.6	down-regulated		AC012501.2	down-regulated		AC009133.17	down-regulated
RFPL4A	down-regulated		KCNK9	down-regulated		WFDC8	down-regulated
ZNF727	down-regulated		ZNF215	down-regulated		C11orf96	down-regulated
RP1-310O13.13	down-regulated		MIR3617	down-regulated		RP11-21B23.3	down-regulated
TCEAL6	down-regulated		SEMG1	down-regulated		TBX6	down-regulated
ATOH1	down-regulated		NELL2	down-regulated		GS1-124K5.2	down-regulated
HBM	down-regulated		WNT2	down-regulated		CYSRT1	down-regulated
VSTM2A	down-regulated		BX842568.1	down-regulated		PTK6	down-regulated
RP11-1263C18.1	down-regulated		OR2M7	down-regulated		ZNF300	down-regulated
RP11-465L10.10	down-regulated		CTC-308K20.1	down-regulated		SLIT2	down-regulated
OR2AT4	down-regulated		KIRREL2	down-regulated		HIST1H2BB	down-regulated
GRP	down-regulated		TBC1D21	down-regulated		ANP32E	down-regulated
LINC01307	down-regulated		ARHGAP19-SLIT1	down-regulated		RP5-1098D14.1	down-regulated
PROX1	down-regulated		RP11-1263C18.1	down-regulated		NFKB2	down-regulated
HOXC11	down-regulated		C18orf42	down-regulated		DNAJA4	down-regulated
AC092634.1	down-regulated		CRISPLD1	down-regulated		PA2G4	down-regulated
RP5-983L19.2	down-regulated		RP11-452C8.1	down-regulated		SLC15A3	down-regulated
MIR6511A2	down-regulated		IGHV7-81	down-regulated		DNASE1L3	down-regulated
RP11-766H1.1	down-regulated		RP11-166D18.1	down-regulated		CTB-131K11.1	down-regulated
SOX3	down-regulated		RP11-540K16.1	down-regulated		CTB-180A7.3	down-regulated
SSTR1	down-regulated		FAM127C	down-regulated		AC009501.4	down-regulated
MIR7-3	down-regulated		PHF21B	down-regulated		RP11-552F3.9	down-regulated
GIF	down-regulated		RAX	down-regulated		CTD-3051D23.3	down-regulated
RP11-364C11.2	down-regulated		GEMIN8	down-regulated		SPOCD1	down-regulated
GSX1	down-regulated		DOCK11	down-regulated		LY6K	down-regulated
LYPD8	down-regulated		XXbac-BPG154L12.4	down-regulated		USP2	down-regulated
RP3-412A9.17	down-regulated		WNT9B	down-regulated		AC004901.1	down-regulated
CALCB	down-regulated		LIN28A	down-regulated		OR1J2	down-regulated
INSM2	down-regulated		EMB	down-regulated		RP11-404E16.1	down-regulated
LRRC9	down-regulated		OR2T2	down-regulated		SPNS2	down-regulated
COMP	down-regulated		COL1A2	down-regulated		DLX3	down-regulated
TRIM67	down-regulated		VWC2	down-regulated		FAM195B	down-regulated
CDH2	down-regulated		TRIM51HP	down-regulated		CHAC2	down-regulated
AC005618.6	down-regulated		RP4-801G22.3	down-regulated		MEIS1	down-regulated
ZC2HC1A	down-regulated		CERKL	down-regulated		RNF225	down-regulated
CTD-2587H24.10	down-regulated		MIR518C	down-regulated		CTD-3252C9.2	down-regulated
VSTM2B	down-regulated		DBX2	down-regulated		IDH3A	down-regulated
NTRK3	down-regulated		KIFC2	down-regulated		SLC9A3R1	down-regulated
RP11-216L13.21	down-regulated		RP11-99E15.2	down-regulated		PDCD2L	down-regulated
MIR512-2	down-regulated		MIR942	down-regulated		COIL	down-regulated
SYN1	down-regulated		KCNIP2	down-regulated		NBR1	down-regulated
AC073464.4	down-regulated		SYN1	down-regulated		RP11-6I2.3	down-regulated
AC013402.3	down-regulated		TSPYL2	down-regulated		RP11-277A4.4	down-regulated
TM6SF1	down-regulated		CDH2	down-regulated		FRG2FP	down-regulated
CSMD3	down-regulated		AC002454.1	down-regulated		DEDD2	down-regulated
TTC9B	down-regulated		MIR124-3	down-regulated		RP11-168J19.2	down-regulated
WNT9B	down-regulated		TRBV2	down-regulated		SV2A	down-regulated
MTMR1	down-regulated		ATP1B2	down-regulated		SUCLA2	down-regulated
OR6V1	down-regulated		ZMAT1	down-regulated		CTPS1	down-regulated
LHX5-AS1	down-regulated		LL09NC01-139C3.1	down-regulated		CAPN12	down-regulated
BEX1	down-regulated		RP11-379B8.1	down-regulated		ACP5	down-regulated
MAP3K14-AS1	down-regulated		RP11-473E2.4	down-regulated		RP11-89K10.1	down-regulated
MIR409	down-regulated		SIGLEC12	down-regulated		MIR3617	down-regulated
LPL	down-regulated		ITGA5	down-regulated		KCNAB3	down-regulated
LINC00883	down-regulated		VSTM2B	down-regulated		RP11-302L19.3	down-regulated
SPX	down-regulated		SRRM4	down-regulated		C4orf27	down-regulated
NONO	down-regulated		LY6H	down-regulated		ZC3HAV1L	down-regulated
KCNA3	down-regulated		SNRPGP16	down-regulated		AP001628.6	down-regulated
RNA5SP243	down-regulated		MAP1LC3B	down-regulated		PRDX5	down-regulated
FAM162B	down-regulated		AC091199.1	down-regulated		BPIFA1	down-regulated
EMBP1	down-regulated		KCNT2	down-regulated		HOXA10	down-regulated
JAM2	down-regulated		RP11-364C11.2	down-regulated		RP11-141O11.2	down-regulated
RP13-653N12.1	down-regulated		RP11-661C8.3	down-regulated		SVEP1	down-regulated
ST6GAL2	down-regulated		C8orf34	down-regulated		RP11-855O10.2	down-regulated
MKRNP2	down-regulated		BPIFA3	down-regulated		KRT14	down-regulated
RSPO1	down-regulated		TMEM196	down-regulated		CTD-2269F5.1	down-regulated
PMCHL2	down-regulated		RP6-91H8.3	down-regulated		CFHR2	down-regulated
CEACAM5	down-regulated		RP13-653N12.1	down-regulated		TXNRD2	down-regulated
RP4-801G22.3	down-regulated		KIR3DX1	down-regulated		TMEM216	down-regulated
OR9I1	down-regulated		RP11-325O24.1	down-regulated		FAM173A	down-regulated
RFX4	down-regulated		RP4-765H13.1	down-regulated		H1FX-AS1	down-regulated
TSC22D3	down-regulated		RP11-756K15.2	down-regulated		KRT6B	down-regulated
AC009505.4	down-regulated		CTD-2228K2.7	down-regulated		RP11-80H5.2	down-regulated
LA16c-3G11.7	down-regulated		MTMR8	down-regulated		CDKN2B	down-regulated
C5orf38	down-regulated		RNA5SP19	down-regulated		OST4	down-regulated
AC117401.1	down-regulated		RP11-395E19.2	down-regulated		AC009237.13	down-regulated
RP11-678K21.1	down-regulated		HS3ST4	down-regulated		LINC00243	down-regulated
RP11-955H22.1	down-regulated		MIR7-3	down-regulated		APBB1IP	down-regulated
TMEM132E	down-regulated		RIMS4	down-regulated		SLC17A4	down-regulated
RP11-486O13.2	down-regulated		CTC-526N19.1	down-regulated		CABIN1	down-regulated
CRP	down-regulated		SHISA9	down-regulated		ADAMTSL3	down-regulated
MIR892C	down-regulated		OR5BC1P	down-regulated		RP11-169K17.3	down-regulated
RP1-225E12.2	down-regulated		ADRA1A	down-regulated		RNU6-1088P	down-regulated
FOLH1	down-regulated		RALGAPA2	down-regulated		ATOH1	down-regulated
RP11-540K16.1	down-regulated		ST8SIA1	down-regulated		MARK1	down-regulated
PLCXD3	down-regulated		FSTL5	down-regulated		SEPT10	down-regulated
HOXD9	down-regulated		RP11-395I6.2	down-regulated		DGKA	down-regulated
ZNF793	down-regulated		AC004901.1	down-regulated		TMEM189-UBE2V1	down-regulated
GPR42	down-regulated		MIR512-2	down-regulated		TGFBI	down-regulated
GLRA1	down-regulated		AP000282.2	down-regulated		C12orf80	down-regulated
GRIK1	down-regulated		LINC00643	down-regulated		AL022341.3	down-regulated
PRKG2	down-regulated		RP11-80H5.2	down-regulated		CTD-2034I21.1	down-regulated
CNTN5	down-regulated		CXorf56	down-regulated		VILL	down-regulated
C3orf14	down-regulated		TAF7	down-regulated		BPGM	down-regulated
TET1	down-regulated		OR5AU1	down-regulated		FBLN1	down-regulated
STK33	down-regulated		RP11-460B17.3	down-regulated		RUSC1	down-regulated
DIAPH2	down-regulated		XXyac-YX65C7_A.3	down-regulated		HMCN2	down-regulated
NMBR	down-regulated		CTC-359M8.1	down-regulated		ZNF436	down-regulated
PENK	down-regulated		APBB1IP	down-regulated		CEACAM5	down-regulated
DMRT2	down-regulated		CD300E	down-regulated		EDRF1	down-regulated
KCNIP2	down-regulated		OR2T11	down-regulated		FABP7	down-regulated
NLRP13	down-regulated		SLC16A2	down-regulated		RMST	down-regulated
SHD	down-regulated		RFX4	down-regulated		AC006022.4	down-regulated
ANKS1B	down-regulated		RP11-666A20.3	down-regulated		CTD-2410N18.3	down-regulated
MIR519E	down-regulated		COLEC12	down-regulated		UQCRC1	down-regulated
C17orf77	down-regulated		BX470102.3	down-regulated		ADO	down-regulated
OR2T29	down-regulated		NAT16	down-regulated		NRSN2-AS1	down-regulated
RPH3A	down-regulated		CACNA1G-AS1	down-regulated		CHST2	down-regulated
AIFM1	down-regulated		MIR514A3	down-regulated		CTD-2194D22.4	down-regulated
RP11-449J10.1	down-regulated		RP11-742D12.2	down-regulated		MAP3K12	down-regulated
DEFB116	down-regulated		GIMAP2	down-regulated		ENTPD1-AS1	down-regulated
FAM26E	down-regulated		RPL18AP16	down-regulated		SLC1A4	down-regulated
RNASE3	down-regulated		ETNPPL	down-regulated		OR13D1	down-regulated
AC007682.1	down-regulated		PCYT1B	down-regulated		AP001625.4	down-regulated
MAB21L1	down-regulated		LINC01586	down-regulated		CRMP1	down-regulated
C3P1	down-regulated		AVPR1B	down-regulated		CTD-2544N14.3	down-regulated
RARRES2P1	down-regulated		FAM162B	down-regulated		RP4-539M6.14	down-regulated
OR10Z1	down-regulated		RP11-394O2.3	down-regulated		SNX6	down-regulated
RPL29P30	down-regulated		KB-1980E6.3	down-regulated		CCDC70	down-regulated
LINC01269	down-regulated		RMST	down-regulated		TMEM234	down-regulated
MIR520B	down-regulated		OGT	down-regulated		CTC-228N24.2	down-regulated
MEF2B	down-regulated		VWDE	down-regulated		NEK11	down-regulated
L1CAM	down-regulated		TBX18	down-regulated		FUOM	down-regulated
RP11-748H22.1	down-regulated		AC073464.4	down-regulated		P4HA2	down-regulated
CAPSL	down-regulated		RP5-1009E24.9	down-regulated		RP4-764D2.1	down-regulated
ATP1B2	down-regulated		MVB12A	down-regulated		TLN1	down-regulated
CTD-2616J11.11	down-regulated		TET1	down-regulated		AC124944.5	down-regulated
CDH6	down-regulated		AC021205.1	down-regulated		EDDM3B	down-regulated
TMEM196	down-regulated		RP11-375B1.1	down-regulated		MIR575	down-regulated
ADRA1A	down-regulated		C10orf53	down-regulated		CCDC158	down-regulated
SLC27A6	down-regulated		URAHP	down-regulated		TAGLN2	down-regulated
RGS7	down-regulated		RP5-945F2.3	down-regulated		CERS1	down-regulated
RP11-576E20.1	down-regulated		RP3-406A7.7	down-regulated		COL25A1	down-regulated
CECR2	down-regulated		AC010096.1	down-regulated		ESPNP	down-regulated
DKK2	down-regulated		FGF20	down-regulated		PKIG	down-regulated
OR2T34	down-regulated		GLRA1	down-regulated		TCAM1P	down-regulated
KIRREL2	down-regulated		TRO	down-regulated		SKINTL	down-regulated
PCYT1B	down-regulated		STAC2	down-regulated		CHCHD10	down-regulated
HNRNPKP3	down-regulated		C1orf94	down-regulated		AC024560.2	down-regulated
CTD-2291D10.4	down-regulated		CTB-181H17.1	down-regulated		HN1L	down-regulated
AP000345.2	down-regulated		CDH10	down-regulated		HMGB1P21	down-regulated
CTC-359M8.1	down-regulated		PRICKLE3	down-regulated		PPP1R18	down-regulated
FPR3	down-regulated		LINC00838	down-regulated		TNKS2	down-regulated
TUNAR	down-regulated		CRP	down-regulated		KRTAP4-11	down-regulated
MMGT1	down-regulated		LINC00636	down-regulated		BPIFA2	down-regulated
FAM135B	down-regulated		FPR3	down-regulated		FAM83C	down-regulated
CACNG7	down-regulated		TUNAR	down-regulated		PTTG1	down-regulated
RP11-760D2.11	down-regulated		ADAMTS12	down-regulated		C3orf70	down-regulated
GPM6A	down-regulated		ANKS1B	down-regulated		HCG4P7	down-regulated
RP11-556I13.2	down-regulated		RP1-159A19.4	down-regulated		AC004637.1	down-regulated
TMEM200B	down-regulated		CDH6	down-regulated		AC021188.4	down-regulated
SRRM4	down-regulated		ARHGEF9	down-regulated		HMG20B	down-regulated
AC003002.4	down-regulated		MAGED2	down-regulated		MRPL22	down-regulated
MIR1-1	down-regulated		OFD1	down-regulated		FAM177A1	down-regulated
MIR509-2	down-regulated		CTNND2	down-regulated		RP3-333H23.8	down-regulated
PTHLH	down-regulated		UBL4A	down-regulated		AIDA	down-regulated
RP11-143I21.1	down-regulated		SHD	down-regulated		TUBA4A	down-regulated
MOXD2P	down-regulated		OR6V1	down-regulated		GPR87	down-regulated
COL26A1	down-regulated		LINC00934	down-regulated		RAC3	down-regulated
FAM181B	down-regulated		CPXM1	down-regulated		DBIL5P	down-regulated
AC104076.3	down-regulated		GABRB1	down-regulated		CHST3	down-regulated
GRIN2A	down-regulated		RP11-678G14.4	down-regulated		SNHG15	down-regulated
RP11-320G24.1	down-regulated		DUSP26	down-regulated		CFAP70	down-regulated
HYDIN	down-regulated		KCNA3	down-regulated		SDHB	down-regulated
BARHL1	down-regulated		MAP3K14-AS1	down-regulated		TMEM133	down-regulated
TTYH1	down-regulated		CECR2	down-regulated		DCPS	down-regulated
RP3-407E4.4	down-regulated		CTD-2147F2.2	down-regulated		LINC01137	down-regulated
LIN28A	down-regulated		MYCT1	down-regulated		BANF2	down-regulated
PADI2	down-regulated		LINC01020	down-regulated		KLF4	down-regulated
HUWE1	down-regulated		RP5-856G1.1	down-regulated		SMU1	down-regulated
LINC01377	down-regulated		RP11-357H14.17	down-regulated		MPLKIP	down-regulated
HBQ1	down-regulated		OR2T3	down-regulated		PPFIA2	down-regulated
CTAGE6	down-regulated		RP11-667K14.9	down-regulated		PIWIL1	down-regulated
ACKR1	down-regulated		NONO	down-regulated		ETV4	down-regulated
LRRC32	down-regulated		DCC	down-regulated		RP11-160O5.1	down-regulated
FGF3	down-regulated		L1CAM	down-regulated		CTD-2331C18.5	down-regulated
GPR173	down-regulated		PROK2	down-regulated		MROH6	down-regulated
ACTL6B	down-regulated		AP000345.2	down-regulated		AC004471.10	down-regulated
CDX2	down-regulated		FGF4	down-regulated		FASTK	down-regulated
ZSCAN18	down-regulated		MIR519D	down-regulated		LINC01144	down-regulated
RP11-196D18.2	down-regulated		MOXD2P	down-regulated		TRIM29	down-regulated
ZXDB	down-regulated		TMEM132E	down-regulated		RP11-849N15.4	down-regulated
PGM5P3-AS1	down-regulated		MPEG1	down-regulated		C1orf100	down-regulated
KCNK9	down-regulated		LYPD8	down-regulated		HSD11B1L	down-regulated
SUMO2P6	down-regulated		TMEM101	down-regulated		ESYT3	down-regulated
NPHS2	down-regulated		RP11-439H13.2	down-regulated		JAG1	down-regulated
OR52N2	down-regulated		CPA3	down-regulated		S100A14	down-regulated
MICU3	down-regulated		WAS	down-regulated		MUC3A	down-regulated
OR1E1	down-regulated		LA16c-3G11.7	down-regulated		CTD-2213F21.2	down-regulated
CA8	down-regulated		RPH3A	down-regulated		PLEKHH2	down-regulated
RP11-643M14.1	down-regulated		RP13-266I11.1	down-regulated		ACAP1	down-regulated
RP11-80F22.14	down-regulated		C10orf55	down-regulated		ZAR1	down-regulated
OR5R1	down-regulated		RP11-174G6.1	down-regulated		C1orf233	down-regulated
RP11-756K15.2	down-regulated		HP	down-regulated		NDUFS2	down-regulated
RP11-266L9.5	down-regulated		CTC-459F4.3	down-regulated		KREMEN1	down-regulated
FGF14	down-regulated		LRRC74B	down-regulated		ARFRP1	down-regulated
LINC01435	down-regulated		CTD-2143L24.1	down-regulated		SLC24A3	down-regulated
TAF1	down-regulated		LINC01564	down-regulated		ACE3P	down-regulated
ADAMTS12	down-regulated		OR9I1	down-regulated		KIF3B	down-regulated
POTEM	down-regulated		TCEAL3	down-regulated		LOX	down-regulated
HOXC6	down-regulated		FAM43B	down-regulated		LRRC16B	down-regulated
MIR6128	down-regulated		RP11-148B3.1	down-regulated		JMJD8	down-regulated
FOXO1B	down-regulated		PRR16	down-regulated		SDSL	down-regulated
DEFB115	down-regulated		CTC-339O9.1	down-regulated		TRIM54	down-regulated
RNA5SP175	down-regulated		AMMECR1	down-regulated		CPNE4	down-regulated
SYT4	down-regulated		KCNK10	down-regulated		RP11-557H15.4	down-regulated
AL132709.1	down-regulated		BAAT	down-regulated		DFNB31	down-regulated
PGM5-AS1	down-regulated		RP11-449J10.1	down-regulated		AGK	down-regulated
YWHAEP7	down-regulated		TMEM202	down-regulated		CASP2	down-regulated
CBX3P1	down-regulated		DLX3	down-regulated		PKMYT1	down-regulated
AC008781.1	down-regulated		LINC00693	down-regulated		TRO	down-regulated
IGHV3-73	down-regulated		GRIK1	down-regulated		HTRA4	down-regulated
LHFPL3	down-regulated		LIPN	down-regulated		LRRC14	down-regulated
SEC14L5	down-regulated		BANF1P5	down-regulated		PKP3	down-regulated
RP4-537K23.4	down-regulated		GRP	down-regulated		S100A3	down-regulated
AP000282.2	down-regulated		AC010745.4	down-regulated		SH3BP1	down-regulated
IL1RAPL2	down-regulated		RSPO1	down-regulated		TCTN3	down-regulated
TMEM55A	down-regulated		MYHAS	down-regulated		AC096574.5	down-regulated
CTD-2143L24.1	down-regulated		CNRIP1	down-regulated		PMEL	down-regulated
HSFY1P1	down-regulated		LINC00244	down-regulated		FGF1	down-regulated
PRR16	down-regulated		LINC01269	down-regulated		TRPV2	down-regulated
MIR518C	down-regulated		RP11-768F21.1	down-regulated		MOGAT2	down-regulated
ARMCX4	down-regulated		SPINT4	down-regulated		PLD3	down-regulated
LINC00693	down-regulated		MIR520B	down-regulated		RP11-386M24.9	down-regulated
MIR124-3	down-regulated		RP11-430H10.1	down-regulated		AC005523.2	down-regulated
OR10J3	down-regulated		OR2T34	down-regulated		GPR161	down-regulated
RP13-266I11.1	down-regulated		NCAM2	down-regulated		HPS6	down-regulated
RP11-476I15.6	down-regulated		MIR409	down-regulated		OGDH	down-regulated
STARD8	down-regulated		WFDC8	down-regulated		APRT	down-regulated
RP11-314D7.2	down-regulated		RP11-783L4.1	down-regulated		DYNLL1	down-regulated
MBD3L1	down-regulated		LINC01063	down-regulated		INIP	down-regulated
F8	down-regulated		RP3-514A23.2	down-regulated		DSG3	down-regulated
RP11-166D18.1	down-regulated		TBL1X	down-regulated		RP5-1126H10.2	down-regulated
PRSS58	down-regulated		FAM181B	down-regulated		MIB2	down-regulated
CTC-339O9.1	down-regulated		CAMKV	down-regulated		MYO3A	down-regulated
GM140	down-regulated		ATP1A3	down-regulated		MAML1	down-regulated
GALNTL6	down-regulated		RELN	down-regulated		SLC7A6	down-regulated
NEFL	down-regulated		EPS8L1	down-regulated		LY6D	down-regulated
TAF7	down-regulated		OR2M3	down-regulated		CTD-2201I18.1	down-regulated
OR2M1P	down-regulated		AC009501.4	down-regulated		C1orf168	down-regulated
C1orf94	down-regulated		RP11-760D2.12	down-regulated		ARHGAP40	down-regulated
T	down-regulated		RP11-45A12.2	down-regulated		GADD45GIP1	down-regulated
SPINT4	down-regulated		RP3-510L9.1	down-regulated		LINC00235	down-regulated
RP11-143A12.3	down-regulated		AC012454.4	down-regulated		RANBP3	down-regulated
OR5AU1	down-regulated		LINC00926	down-regulated		PRSS27	down-regulated
STC1	down-regulated		GNAQP1	down-regulated		ARRDC2	down-regulated
RP11-561P12.5	down-regulated		FCRLB	down-regulated		DNAJA3	down-regulated
RP11-45A12.2	down-regulated		LILRP2	down-regulated		RP11-162P23.2	down-regulated
RP5-1077H22.1	down-regulated		TMEM71	down-regulated		RP11-167H9.5	down-regulated
ARHGAP19-SLIT1	down-regulated		NHS	down-regulated		PQLC2L	down-regulated
MUC3A	down-regulated		RP3-354N19.1	down-regulated		SMIM20	down-regulated
ZNF280C	down-regulated		HAR1A	down-regulated		TPM4	down-regulated
FAM155B	down-regulated		PRR36	down-regulated		RP11-254F7.4	down-regulated
FCRL1	down-regulated		OR52N2	down-regulated		SNN	down-regulated
CDH8	down-regulated		RP11-678K21.1	down-regulated		SH3D21	down-regulated
RNU6-1088P	down-regulated		KCNK17	down-regulated		BGLAP	down-regulated
LA16c-360A4.1	down-regulated		RNVU1-6	down-regulated		TMEM45A	down-regulated
GSTA4	down-regulated		RP11-244B22.5	down-regulated		GSR	down-regulated
CCDC160	down-regulated		MIR193B	down-regulated		CCNG2	down-regulated
AC010872.1	down-regulated		CD33	down-regulated		C10orf99	down-regulated
NHS	down-regulated		YWHAEP7	down-regulated		RP11-618G20.1	down-regulated
RP11-24P24.1	down-regulated		BPIFA4P	down-regulated		C9orf156	down-regulated
LA16c-2F2.8	down-regulated		HSFY1P1	down-regulated		MIR135A2	down-regulated
TRPC4	down-regulated		F8	down-regulated		EZH1	down-regulated
NLRP8	down-regulated		NMBR	down-regulated		RP11-161H23.5	down-regulated
GABRQ	down-regulated		FRMD7	down-regulated		RP5-1029F21.3	down-regulated
LINC01105	down-regulated		AC034228.2	down-regulated		FAM110A	down-regulated
COL1A2	down-regulated		CTAGE6	down-regulated		LRCH3	down-regulated
NPFFR2	down-regulated		RP11-575F12.2	down-regulated		HDGFRP3	down-regulated
RP11-89F3.2	down-regulated		LINC01366	down-regulated		CTC1	down-regulated
RP11-495O10.1	down-regulated		AC010872.1	down-regulated		RP11-428J1.4	down-regulated
LINC00960	down-regulated		LL0XNC01-116E7.2	down-regulated		CNGA3	down-regulated
NANOS1	down-regulated		AMER1	down-regulated		GPR63	down-regulated
AARD	down-regulated		IZUMO4	down-regulated		JOSD2	down-regulated
BRINP2	down-regulated		GFRA4	down-regulated		PLSCR5	down-regulated
RNU6-1082P	down-regulated		CTD-2538A21.1	down-regulated		NDUFB10	down-regulated
ZNF479	down-regulated		CFC1	down-regulated		TRAPPC10	down-regulated
PLEKHO1	down-regulated		ATRNL1	down-regulated		LINC00299	down-regulated
RP5-1009E24.9	down-regulated		SHISA2	down-regulated		RP11-124O11.1	down-regulated
KB-1980E6.3	down-regulated		RP11-893F2.15	down-regulated		LINC00899	down-regulated
AC073321.4	down-regulated		CRH	down-regulated		COASY	down-regulated
AC009411.1	down-regulated		IGSF21	down-regulated		NDE1	down-regulated
TRBV19	down-regulated		ITM2A	down-regulated		RP1-80N2.2	down-regulated
RUNX1T1	down-regulated		SLC12A5	down-regulated		DUT	down-regulated
CTD-2007A10.1	down-regulated		RFPL4A	down-regulated		ACTN3	down-regulated
GAPDHS	down-regulated		RUNX1T1	down-regulated		HP1BP3	down-regulated
OR8B12	down-regulated		HAP1	down-regulated		CAPN13	down-regulated
TMEM101	down-regulated		AC003005.4	down-regulated		SYT7	down-regulated
HTR1A	down-regulated		TNFSF11	down-regulated		RN7SL105P	down-regulated
UBA1	down-regulated		LINC01132	down-regulated		OR10H5	down-regulated
RPL18AP16	down-regulated		TWIST1	down-regulated		EDC4	down-regulated
CTD-2147F2.2	down-regulated		FAM26E	down-regulated		NUDT8	down-regulated
RP11-20B7.1	down-regulated		CCDC23	down-regulated		SLC3A2	down-regulated
RP5-1186N24.3	down-regulated		ST6GAL2	down-regulated		MSL2	down-regulated
RP11-661A12.5	down-regulated		AC078899.1	down-regulated		PTPRU	down-regulated
CTD-2342J14.6	down-regulated		KRTAP5-11	down-regulated		STRN	down-regulated
SCTR	down-regulated		ABCA6	down-regulated		TMEM87B	down-regulated
AC034228.2	down-regulated		NLRP13	down-regulated		EBPL	down-regulated
LL22NC03-63E9.3	down-regulated		ETV2	down-regulated		BAIAP3	down-regulated
RP11-452N4.1	down-regulated		KIT	down-regulated		RP11-403I13.7	down-regulated
WNT2	down-regulated		ARMCX4	down-regulated		RGR	down-regulated
AC093326.2	down-regulated		ZNF280A	down-regulated		KIAA1328	down-regulated
CA4	down-regulated		PTBP3	down-regulated		PLA2G3	down-regulated
TBC1D21	down-regulated		PADI2	down-regulated		IFT81	down-regulated
SHANK1	down-regulated		ST6GALNAC5	down-regulated		RP1-228P16.5	down-regulated
NAT16	down-regulated		SST	down-regulated		RLTPR	down-regulated
LINC00636	down-regulated		WFDC6	down-regulated		ATP10D	down-regulated
FBXL7	down-regulated		ROPN1	down-regulated		DSC1	down-regulated
AC005307.3	down-regulated		RP11-718B12.2	down-regulated		ZNF335	down-regulated
OGDHL	down-regulated		GRIN2A	down-regulated		MED10	down-regulated
KCNA5	down-regulated		EPPIN	down-regulated		GJB5	down-regulated
SUN5	down-regulated		DKK3	down-regulated		GS1-124K5.3	down-regulated
C11orf88	down-regulated		RUNDC3A	down-regulated		DNASE1L2	down-regulated
RP3-425P12.1	down-regulated		LINC01415	down-regulated		ELP3	down-regulated
NEUROD4	down-regulated		LHX5-AS1	down-regulated		ZFP1	down-regulated
CTD-2213F21.3	down-regulated		RP3-495K2.2	down-regulated		DNAJB1	down-regulated
SYT1	down-regulated		IKBIP	down-regulated		ARPC4-TTLL3	down-regulated
RP11-395I6.2	down-regulated		IL1RAPL2	down-regulated		CCDC113	down-regulated
RP11-437L7.1	down-regulated		LINC01489	down-regulated		MIR4781	down-regulated
RP11-476B1.1	down-regulated		KRT24	down-regulated		RP11-715J22.2	down-regulated
RP11-244B22.5	down-regulated		TCEAL6	down-regulated		CPEB1	down-regulated
LINC00619	down-regulated		AC011752.1	down-regulated		RPL14P1	down-regulated
OR7G2	down-regulated		PMCHL2	down-regulated		ENTPD7	down-regulated
RP11-1324A7.2	down-regulated		2020-03-04	down-regulated		SDC1	down-regulated
KLHL15	down-regulated		ZXDB	down-regulated		UBIAD1	down-regulated
RP3-514A23.2	down-regulated		GABRQ	down-regulated		EIF2AK2	down-regulated
EPO	down-regulated		LINC00883	down-regulated		COPG1	down-regulated
LINC00968	down-regulated		PRSS56	down-regulated		MGA	down-regulated
AC010729.2	down-regulated		LA16c-360A4.1	down-regulated		VASH2	down-regulated
TOMM40L	down-regulated		EFCAB13	down-regulated		CLUAP1	down-regulated
OR2W3	down-regulated		SLC7A10	down-regulated		HDAC5	down-regulated
MT3	down-regulated		RP11-630C16.2	down-regulated		EIF4E2	down-regulated
AMER2	down-regulated		LHFPL3	down-regulated		IDH3B	down-regulated
ADCY8	down-regulated		C8B	down-regulated		UBR2	down-regulated
RP3-406A7.7	down-regulated		AMER2	down-regulated		RP11-885B4.1	down-regulated
CD1E	down-regulated		CTD-2342J14.6	down-regulated		CTD-2410N18.4	down-regulated
NKX2-2-AS1	down-regulated		CAPSL	down-regulated		S100A4	down-regulated
RBBP7	down-regulated		RP3-425P12.1	down-regulated		CDC42EP5	down-regulated
KCNA4	down-regulated		RP11-196D18.2	down-regulated		DNAJC22	down-regulated
LIPN	down-regulated		RP11-6I2.3	down-regulated		GYPB	down-regulated
FRG2B	down-regulated		LPL	down-regulated		FHL3	down-regulated
AC011752.1	down-regulated		UPRT	down-regulated		STAG3L2	down-regulated
ADRA2A	down-regulated		GCM2	down-regulated		ARNTL2	down-regulated
TBR1	down-regulated		RP11-362A9.3	down-regulated		CD3G	down-regulated
TRBV24-1	down-regulated		RP11-672L10.3	down-regulated		CBR3	down-regulated
MIR154	down-regulated		PEX5L	down-regulated		SRCIN1	down-regulated
ADCYAP1	down-regulated		HCG21	down-regulated		CYP2C19	down-regulated
ITK	down-regulated		ULBP2	down-regulated		ASNA1	down-regulated
RP11-368M16.10	down-regulated		MATK	down-regulated		CBX3	down-regulated
COLEC12	down-regulated		MMGT1	down-regulated		ARL4C	down-regulated
HAUS7	down-regulated		SPIN3	down-regulated		IGF2BP3	down-regulated
LRRC74B	down-regulated		PGM5-AS1	down-regulated		C6orf120	down-regulated
OR14A16	down-regulated		AC017116.11	down-regulated		TM7SF3	down-regulated
RGPD2	down-regulated		TRDV1	down-regulated		RTN3	down-regulated
ZNF521	down-regulated		AC079922.3	down-regulated		SLC52A1	down-regulated
CDH12	down-regulated		ATP8B5P	down-regulated		RIMS3	down-regulated
SYT3	down-regulated		FOXO1B	down-regulated		TUSC2	down-regulated
TRBV5-1	down-regulated		STAG3	down-regulated		RP11-522B15.3	down-regulated
RP11-128M1.1	down-regulated		RP11-560J1.2	down-regulated		PRB1	down-regulated
GPR12	down-regulated		SHANK1	down-regulated		ADCY6	down-regulated
SFRP1	down-regulated		ALDOC	down-regulated		AP000436.4	down-regulated
RP11-831A10.1	down-regulated		ANKLE1	down-regulated		KLHL25	down-regulated
TLR4	down-regulated		ACSL4	down-regulated		KIAA0513	down-regulated
LINC01179	down-regulated		HBQ1	down-regulated		CD44	down-regulated
CEACAM21	down-regulated		CFAP61	down-regulated		MREG	down-regulated
MIR337	down-regulated		IGHD1-14	down-regulated		PLA2G6	down-regulated
OR2W1	down-regulated		RNU6-1082P	down-regulated		PANX1	down-regulated
CALB1	down-regulated		ZNF615	down-regulated		KANSL3	down-regulated
GFRA4	down-regulated		MPDU1	down-regulated		LCN2	down-regulated
TBX22	down-regulated		RP11-556I13.2	down-regulated		MRPL33	down-regulated
RP11-334E6.10	down-regulated		PRKG2	down-regulated		ZNF888	down-regulated
OR2Z1	down-regulated		AC004637.1	down-regulated		PNPLA4	down-regulated
OR5D13	down-regulated		SPSB4	down-regulated		POLR1E	down-regulated
OR2T5	down-regulated		HIST2H2AA4	down-regulated		SLC7A8	down-regulated
MDGA2	down-regulated		RP11-368M16.7	down-regulated		CHCHD2P6	down-regulated
LINC01559	down-regulated		UBA1	down-regulated		PAK1	down-regulated
OR1J4	down-regulated		SLC35F4	down-regulated		PLEKHA6	down-regulated
OR5G1P	down-regulated		ADPRH	down-regulated		CCDC159	down-regulated
AC010096.1	down-regulated		OR4A47	down-regulated		B3GNT9	down-regulated
PRR36	down-regulated		RP11-867G23.10	down-regulated		FBXW9	down-regulated
ST8SIA1	down-regulated		COL26A1	down-regulated		AC092117.1	down-regulated
RNVU1-6	down-regulated		MTMR1	down-regulated		RP4-734P14.4	down-regulated
TRPV5	down-regulated		VNN1	down-regulated		PSME4	down-regulated
SHH	down-regulated		SLC25A25-AS1	down-regulated		CACNG1	down-regulated
CALCA	down-regulated		GOLGA6L6	down-regulated		REC114	down-regulated
CNTNAP5	down-regulated		FOLH1	down-regulated		UPF2	down-regulated
FOXD4L6	down-regulated		GAPDHS	down-regulated		SNTA1	down-regulated
CTD-2297D10.2	down-regulated		RP11-436H11.5	down-regulated		KCTD21	down-regulated
EPPIN	down-regulated		RP11-760D2.11	down-regulated		AP000721.4	down-regulated
SLC7A10	down-regulated		MIR6744	down-regulated		AC137932.6	down-regulated
OPRK1	down-regulated		BRINP2	down-regulated		AC087294.2	down-regulated
LRRC71	down-regulated		HRK	down-regulated		RPL37	down-regulated
KCNK17	down-regulated		FAM155B	down-regulated		OTOGL	down-regulated
GNAQP1	down-regulated		AC109333.10	down-regulated		DNM3	down-regulated
RAX	down-regulated		CLSTN2	down-regulated		RP11-542C16.1	down-regulated
CTD-2142D14.1	down-regulated		RP11-776A13.1	down-regulated		STKLD1	down-regulated
RP11-285E9.5	down-regulated		RP11-849I19.1	down-regulated		ARHGEF19	down-regulated
LINC00630	down-regulated		PRKCG	down-regulated		SEMA4A	down-regulated
RP11-256I23.3	down-regulated		OPRK1	down-regulated		IQCG	down-regulated
CFC1	down-regulated		CALCB	down-regulated		C10orf120	down-regulated
KLK2	down-regulated		OR10H5	down-regulated		CTC-554D6.1	down-regulated
PRDM9	down-regulated		AC008781.1	down-regulated		MSH4	down-regulated
MUC16	down-regulated		TSC22D3	down-regulated		C19orf24	down-regulated
ANKRD20A5P	down-regulated		SYT9	down-regulated		AC083949.1	down-regulated
ATRNL1	down-regulated		PARVG	down-regulated		LINC00466	down-regulated
AC108025.2	down-regulated		CCND2	down-regulated		ZBTB45	down-regulated
PRSS56	down-regulated		SLC22A31	down-regulated		pk	down-regulated
SLC5A8	down-regulated		POLG2	down-regulated		HCN4	down-regulated
VEGFC	down-regulated		AP006261.1	down-regulated		HCAR2	down-regulated
CEMP1	down-regulated		AC126407.1	down-regulated		CRYAA	down-regulated
RP11-404K5.2	down-regulated		PROX1	down-regulated		M1AP	down-regulated
SLC25A5P3	down-regulated		MARVELD1	down-regulated		CTC-250I14.1	down-regulated
RP11-164H13.1	down-regulated		OR1L3	down-regulated		MIA	down-regulated
MIR381HG	down-regulated		RP11-697E22.2	down-regulated		CTAGE5	down-regulated
HDAC8	down-regulated		RP11-831A10.1	down-regulated		PFDN5	down-regulated
XKR4	down-regulated		CTC-360J11.4	down-regulated		CACNB4	down-regulated
AMOT	down-regulated		RXFP3	down-regulated		AC005154.6	down-regulated
VGF	down-regulated		TMEM55A	down-regulated		NENF	down-regulated
OR6K3	down-regulated		RP11-616M22.5	down-regulated		NOX3	down-regulated
MAGEL2	down-regulated		MS4A3	down-regulated		ECM1	down-regulated
SEMA3E	down-regulated		TTYH1	down-regulated		MIR4651	down-regulated
CTD-2089N3.2	down-regulated		CBX3P1	down-regulated		RFX1	down-regulated
MIR300	down-regulated		IGKV6D-41	down-regulated		H2AFY	down-regulated
CACNB2	down-regulated		AC013480.1	down-regulated		GRN	down-regulated
RP11-306I1.2	down-regulated		FAM24A	down-regulated		RP11-259G18.2	down-regulated
CTD-2647L4.4	down-regulated		PLD3	down-regulated		FER1L4	down-regulated
TRAF3IP3	down-regulated		CTD-2089N3.3	down-regulated		AC005838.2	down-regulated
OR5M8	down-regulated		RP4-537K23.4	down-regulated		CTB-49A3.5	down-regulated
LAMA1	down-regulated		MIR137HG	down-regulated		AC131056.3	down-regulated
C9orf135	down-regulated		OR1B1	down-regulated		NINJ1	down-regulated
OR2G6	down-regulated		EMILIN3	down-regulated		MYH15	down-regulated
MIR3617	down-regulated		MYL10	down-regulated		TTC22	down-regulated
CTB-4E7.1	down-regulated		AP001107.1	down-regulated		ACTC1	down-regulated
LINC00923	down-regulated		BPIFA2	down-regulated		SSR4P1	down-regulated
RP11-395E19.2	down-regulated		CD1D	down-regulated		RP11-256P1.1	down-regulated
TNFSF14	down-regulated		TMEM252	down-regulated		HCRT	down-regulated
CD84	down-regulated		RP4-799P18.2	down-regulated		MPEG1	down-regulated
SLITRK4	down-regulated		KCNQ3	down-regulated		AC068831.10	down-regulated
RP11-281O15.4	down-regulated		AC092117.1	down-regulated		ANO8	down-regulated
RP11-347H15.1	down-regulated		GPR42	down-regulated		UBE2DNL	down-regulated
KIT	down-regulated		AC104076.3	down-regulated		PVRL3-AS1	down-regulated
RP11-168L7.3	down-regulated		TUBB2B	down-regulated		IGSF9	down-regulated
AC108142.1	down-regulated		CA5B	down-regulated		ADRM1	down-regulated
OR5BC1P	down-regulated		FAM135B	down-regulated		UGT2B10	down-regulated
SLIT2	down-regulated		CPLX2	down-regulated		AC037459.4	down-regulated
SIAH3	down-regulated		OGDHL	down-regulated		ERAP1	down-regulated
SLC12A5	down-regulated		RP11-6L6.7	down-regulated		PHLPP1	down-regulated
SST	down-regulated		ZNF521	down-regulated		RSPH10B	down-regulated
CD1C	down-regulated		TAF1	down-regulated		GLRX5	down-regulated
RP3-495K2.2	down-regulated		OR13D1	down-regulated		YEATS2	down-regulated
CDX4	down-regulated		TRAV12-3	down-regulated		WRNIP1	down-regulated
OR10A4	down-regulated		SEC14L3	down-regulated		KRT16	down-regulated
LINC00244	down-regulated		RP11-467N20.7	down-regulated		AC024560.3	down-regulated
PRICKLE3	down-regulated		PRSS58	down-regulated		AC008073.7	down-regulated
PP12613	down-regulated		AC009411.1	down-regulated		DUS1L	down-regulated
ACSS3	down-regulated		OR2T27	down-regulated		ACAP3	down-regulated
ADPRH	down-regulated		RP11-23J9.3	down-regulated		GATSL3	down-regulated
PRKCQ-AS1	down-regulated		HIST1H4J	down-regulated		MICALL1	down-regulated
OR6K6	down-regulated		CD84	down-regulated		AC025335.1	down-regulated
RP3-354N19.1	down-regulated		ACE3P	down-regulated		GALNT7	down-regulated
RP11-738O11.9	down-regulated		AIFM1	down-regulated		GNB2L1	down-regulated
AC073635.5	down-regulated		NCF1C	down-regulated		PIK3CA	down-regulated
CTNNA2	down-regulated		RP11-147K16.3	down-regulated		RP11-426C22.4	down-regulated
CTC-270D5.1	down-regulated		FRG2FP	down-regulated		ICK	down-regulated
OR2T27	down-regulated		ADRA2A	down-regulated		CFAP20	down-regulated
CDKL5	down-regulated		TYROBP	down-regulated		ATF1	down-regulated
PTPN5	down-regulated		C9orf135	down-regulated		TRIP4	down-regulated
OR2T12	down-regulated		RP11-387A1.6	down-regulated		CDKN3	down-regulated
IGHGP	down-regulated		AC007682.1	down-regulated		CRB1	down-regulated
GLP1R	down-regulated		HIST1H2BH	down-regulated		CYP2T3P	down-regulated
MPEG1	down-regulated		RP11-334E6.10	down-regulated		POMT1	down-regulated
OR2T6	down-regulated		RP11-3P17.4	down-regulated		IL1RN	down-regulated
GP2	down-regulated		CTD-2331C18.5	down-regulated		AC022431.2	down-regulated
IGSF21	down-regulated		LINC00485	down-regulated		ZSWIM7	down-regulated
AK5	down-regulated		RP11-376N17.4	down-regulated		HS6ST1P1	down-regulated
AF131216.1	down-regulated		TRBV5-1	down-regulated		NAPSA	down-regulated
THEM7P	down-regulated		FGF14	down-regulated		FAM174A	down-regulated
OR6N2	down-regulated		LRRC71	down-regulated		FAM25A	down-regulated
GRM1	down-regulated		RP5-865N13.1	down-regulated		ADH5	down-regulated
RP11-193H5.1	down-regulated		AC013402.3	down-regulated		PDCD5	down-regulated
MYHAS	down-regulated		RP3-412A9.17	down-regulated		GANC	down-regulated
NPTX1	down-regulated		CACNG7	down-regulated		ACER3	down-regulated
OTOP1	down-regulated		AC007560.1	down-regulated		LRRC45	down-regulated
RP11-565J7.1	down-regulated		ST8SIA6	down-regulated		FCGR2B	down-regulated
AC091814.2	down-regulated		GZMA	down-regulated		RP11-460I13.2	down-regulated
PAX4	down-regulated		RP4-604G5.1	down-regulated		PCTP	down-regulated
OR4A15	down-regulated		HEYL	down-regulated		TMA16	down-regulated
DYDC2	down-regulated		LINC00630	down-regulated		HNRNPH1	down-regulated
CTD-2201G16.1	down-regulated		KCTD19	down-regulated		RAB40A	down-regulated
CFAP61	down-regulated		GPM6A	down-regulated		IP6K2	down-regulated
OR8H2	down-regulated		GPR173	down-regulated		TLDC1	down-regulated
CABP5	down-regulated		ZNF727	down-regulated		DPH1	down-regulated
EIF5A2	down-regulated		NTNG1	down-regulated		OTUD7A	down-regulated
DEFB124	down-regulated		KCNA5	down-regulated		DNAJB2	down-regulated
2020-03-04	down-regulated		HLA-DPB2	down-regulated		GMFB	down-regulated
GS1-72M22.1	down-regulated		CACNB2	down-regulated		TLK2	down-regulated
PABPC5	down-regulated		OR2Z1	down-regulated		RNU6-520P	down-regulated
ATP8B5P	down-regulated		DIAPH2	down-regulated		RAX2	down-regulated
VSTM1	down-regulated		RP11-656G20.1	down-regulated		KCNH4	down-regulated
RP3-380B8.4	down-regulated		PKIB	down-regulated		RP11-685M7.5	down-regulated
GPC4	down-regulated		XXbac-BPGBPG55C20.1	down-regulated		PKDREJ	down-regulated
PDE1C	down-regulated		AARD	down-regulated		USP50	down-regulated
ATP1A3	down-regulated		ADCYAP1	down-regulated		SMAD3	down-regulated
OR10T2	down-regulated		C7orf31	down-regulated		GPR97	down-regulated
LCP2	down-regulated		NUDT17	down-regulated		KCNK7	down-regulated
AC103563.7	down-regulated		AMOT	down-regulated		SPATS2	down-regulated
ITGA8	down-regulated		MICU3	down-regulated		SFTPA2	down-regulated
FAM43B	down-regulated		MUC12	down-regulated		ITGA3	down-regulated
OR2H1	down-regulated		RP11-698N11.2	down-regulated		BEST3	down-regulated
SYCN	down-regulated		C9orf84	down-regulated		BIRC3	down-regulated
CACNG6	down-regulated		RP11-404K5.2	down-regulated		EML2	down-regulated
RP11-88G17.6	down-regulated		NTRK3	down-regulated		C21orf62	down-regulated
OR14J1	down-regulated		MROH9	down-regulated		ORC1	down-regulated
RP11-313J2.1	down-regulated		LL22NC03-63E9.3	down-regulated		HSPA8	down-regulated
GPR64	down-regulated		RP5-983L19.2	down-regulated		ATP2C1	down-regulated
RP11-147K16.3	down-regulated		SLC27A6	down-regulated		MYEOV	down-regulated
PROKR2	down-regulated		LINC00906	down-regulated		APEX1	down-regulated
LINC01163	down-regulated		CCDC64B	down-regulated		RP11-544M22.13	down-regulated
OR7G1	down-regulated		RNASE2	down-regulated		SUMO3	down-regulated
ADRA1D	down-regulated		CLEC4GP1	down-regulated		PLCE1	down-regulated
RP3-510L9.1	down-regulated		MYCBPAP	down-regulated		GARNL3	down-regulated
CELF4	down-regulated		PPIAP17	down-regulated		PDE7B	down-regulated
RP11-498M14.2	down-regulated		RP11-30J20.1	down-regulated		AC011239.1	down-regulated
NKAIN3	down-regulated		MDGA2	down-regulated		RP11-707O23.5	down-regulated
RP11-480A16.1	down-regulated		SKOR1	down-regulated		GJA1	down-regulated
RP11-550H2.2	down-regulated		OR5AN1	down-regulated		RANBP20P	down-regulated
TRO	down-regulated		C3orf14	down-regulated		SPERT	down-regulated
WFDC6	down-regulated		STAC3	down-regulated		SOBP	down-regulated
CLSTN2	down-regulated		SLC25A5P1	down-regulated		C1orf204	down-regulated
GOLGA6L6	down-regulated		CYTH2	down-regulated		CTD-2323K18.1	down-regulated
LINC00485	down-regulated		TBR1	down-regulated		TSKU	down-regulated
PDX1	down-regulated		VEGFC	down-regulated		CELF6	down-regulated
RP11-189E14.4	down-regulated		DUXAP2	down-regulated		HS3ST3B1	down-regulated
RP4-580N22.2	down-regulated		AL132709.1	down-regulated		PARP10	down-regulated
RP11-616M22.5	down-regulated		NPTX1	down-regulated		TNS4	down-regulated
2020-03-11	down-regulated		CRHR1	down-regulated		ECT2L	down-regulated
EPHA10	down-regulated		RP11-383J24.1	down-regulated		PNPLA1	down-regulated
ZNF280A	down-regulated		FABP7	down-regulated		FAHD2A	down-regulated
MIR518A2	down-regulated		LA16c-380A1.2	down-regulated		RP11-14P20.1	down-regulated
TGIF2LX	down-regulated		OR2W1	down-regulated		H3F3A	down-regulated
SORCS1	down-regulated		MIR509-2	down-regulated		GNAO1	down-regulated
S1PR1	down-regulated		NPPB	down-regulated		KRTAP5-2	down-regulated
NRG3	down-regulated		CTB-12A17.2	down-regulated		TBP	down-regulated
OPCML	down-regulated		CTD-2201G16.1	down-regulated		DTL	down-regulated
AC003006.7	down-regulated		EMX1	down-regulated		IQCK	down-regulated
HLA-DPB2	down-regulated		RP11-285E9.5	down-regulated		PI4KAP2	down-regulated
LST1	down-regulated		TPRKB	down-regulated		SMAD1	down-regulated
GYPC	down-regulated		CTA-243E7.3	down-regulated		GAL3ST2	down-regulated
RNASE2	down-regulated		NABP1	down-regulated		GCDH	down-regulated
LINC01056	down-regulated		OR2T6	down-regulated		ATAD3C	down-regulated
RP11-542M13.3	down-regulated		CRMP1	down-regulated		HECW2	down-regulated
BANF1P5	down-regulated		FBXL7	down-regulated		SLC41A3	down-regulated
ETNPPL	down-regulated		T	down-regulated		ZFP64	down-regulated
ELAVL2	down-regulated		RP11-143A12.3	down-regulated		HSPA6	down-regulated
DNAH6	down-regulated		CTC-203F4.2	down-regulated		ZSCAN22	down-regulated
RP11-214O1.1	down-regulated		CACNB4	down-regulated		RP11-329B9.1	down-regulated
RP4-769N13.6	down-regulated		LINC00865	down-regulated		PCDHB15	down-regulated
RP11-98L5.4	down-regulated		RP11-416N4.4	down-regulated		GPAA1	down-regulated
MROH5	down-regulated		RP11-285F7.2	down-regulated		RP3-340N1.6	down-regulated
SEPHS1P6	down-regulated		ZNF668	down-regulated		RP4-583P15.10	down-regulated
OR6W1P	down-regulated		MIATNB	down-regulated		ANXA8L1	down-regulated
CTD-2015G9.2	down-regulated		AGBL2	down-regulated		RIPK4	down-regulated
CNRIP1	down-regulated		RP11-561P12.5	down-regulated		AVP	down-regulated
RP11-526P5.1	down-regulated		PENK	down-regulated		IFT122	down-regulated
FPR1	down-regulated		PKP1	down-regulated		RNF187	down-regulated
EMILIN3	down-regulated		RDH12	down-regulated		CCDC51	down-regulated
CPLX2	down-regulated		LTF	down-regulated		JRK	down-regulated
IGHV3-49	down-regulated		LST1	down-regulated		PKN1	down-regulated
EPDR1	down-regulated		MIR300	down-regulated		ANGEL1	down-regulated
RP11-697E22.2	down-regulated		CLEC4G	down-regulated		RMI2	down-regulated
RP11-661C8.3	down-regulated		ZNF280C	down-regulated		KIAA0391	down-regulated
IKBIP	down-regulated		SORCS3	down-regulated		RP11-756G20.1	down-regulated
STAG3	down-regulated		CTD-2006K23.2	down-regulated		RP11-465K1.2	down-regulated
NR2F6	down-regulated		EDDM3B	down-regulated		REV3L	down-regulated
ZNF626	down-regulated		LINC00596	down-regulated		CTD-2349P21.6	down-regulated
NCF1C	down-regulated		SYT7	down-regulated		FA2H	down-regulated
FRMPD4	down-regulated		MOXD1	down-regulated		HNRNPD	down-regulated
LINC01446	down-regulated		EIF4E1B	down-regulated		DUS3L	down-regulated
SYT13	down-regulated		2020-03-11	down-regulated		SNORA14B	down-regulated
CA5B	down-regulated		SYT3	down-regulated		CPA5	down-regulated
TRIM48	down-regulated		SIGLEC5	down-regulated		CELSR3	down-regulated
CACNG8	down-regulated		LINC00960	down-regulated		RNF26	down-regulated
ZNF630	down-regulated		ELAVL2	down-regulated		RP11-616M22.11	down-regulated
LPA	down-regulated		TNFSF14	down-regulated		VAC14	down-regulated
AC109333.10	down-regulated		UMOD	down-regulated		TP73-AS1	down-regulated
RP11-517H2.6	down-regulated		EOMES	down-regulated		MCM10	down-regulated
BAGE2	down-regulated		TRHDE	down-regulated		TJP3	down-regulated
RP11-416N4.4	down-regulated		RP5-1098D14.1	down-regulated		SF3B4	down-regulated
RP13-554M15.8	down-regulated		HUWE1	down-regulated		AL450992.2	down-regulated
AP000997.2	down-regulated		CD9	down-regulated		CCDC109B	down-regulated
OR6K2	down-regulated		CYP4F30P	down-regulated		CATSPER2P1	down-regulated
LINC00838	down-regulated		LINC00299	down-regulated		TMEM52	down-regulated
EGFL6	down-regulated		NMUR1	down-regulated		DGKZ	down-regulated
ELOVL4	down-regulated		CEACAM21	down-regulated		CENPN	down-regulated
MIR521-2	down-regulated		XKR4	down-regulated		CATSPERB	down-regulated
GABRB3	down-regulated		TCF15	down-regulated		PIAS1	down-regulated
LINC00943	down-regulated		OR10J3	down-regulated		CRTC3-AS1	down-regulated
NLRP5	down-regulated		EMBP1	down-regulated		DSE	down-regulated
CYP4F30P	down-regulated		LINC00272	down-regulated		MRPL44	down-regulated
RP11-1281K21.10	down-regulated		SH3GL3	down-regulated		ASB6	down-regulated
ZNF385D	down-regulated		RP11-214O1.1	down-regulated		DYSF	down-regulated
P2RY10	down-regulated		SYT1	down-regulated		C17orf89	down-regulated
PARVG	down-regulated		AC018804.1	down-regulated		POLR3E	down-regulated
WBSCR17	down-regulated		CSMD3	down-regulated		DNMBP	down-regulated
RP4-799P18.2	down-regulated		BVES	down-regulated		RP11-536I6.2	down-regulated
ARHGAP6	down-regulated		ELFN2	down-regulated		SEMA3F-AS1	down-regulated
OR2M2	down-regulated		MSH4	down-regulated		RP11-366H4.1	down-regulated
VWFP1	down-regulated		OR1J2	down-regulated		NPEPL1	down-regulated
HCN1	down-regulated		OR10Z1	down-regulated		MAP3K4	down-regulated
KLK3	down-regulated		RP11-523O18.7	down-regulated		PRAM1	down-regulated
RP11-452C8.1	down-regulated		C17orf107	down-regulated		WISP3	down-regulated
CTD-2515A14.1	down-regulated		FCRL1	down-regulated		DDA1	down-regulated
RP11-80H5.2	down-regulated		ERICH6B	down-regulated		RBX1	down-regulated
NLRP12	down-regulated		ZUFSP	down-regulated		PRB3	down-regulated
OR8U1	down-regulated		GRIN2C	down-regulated		LCMT1	down-regulated
RP11-81A1.6	down-regulated		RP11-478K15.6	down-regulated		SPSB1	down-regulated
AC000403.1	down-regulated		RP11-548K12.5	down-regulated		CUTA	down-regulated
LINC01410	down-regulated		CELF4	down-regulated		KCNMB2	down-regulated
APBB1IP	down-regulated		ABHD1	down-regulated		UBXN11	down-regulated
NLRP7	down-regulated		CD300LF	down-regulated		RCC1	down-regulated
ATP7A	down-regulated		DKK2	down-regulated		ADAMTS7	down-regulated
OR5AR1	down-regulated		RP11-320G24.1	down-regulated		PREX1	down-regulated
TRBV2	down-regulated		GAMT	down-regulated		AC092684.1	down-regulated
RP11-542M13.2	down-regulated		PTPN5	down-regulated		ASCL5	down-regulated
RP5-865N13.1	down-regulated		PDX1	down-regulated		BCL2L10	down-regulated
MIR202HG	down-regulated		GPR64	down-regulated		CTRC	down-regulated
EMR1	down-regulated		ACP5	down-regulated		PRB4	down-regulated
UMOD	down-regulated		NEFL	down-regulated		ABAT	down-regulated
LINC00596	down-regulated		POLD4	down-regulated		BCAP29	down-regulated
RMST	down-regulated		HEMGN	down-regulated		CPNE6	down-regulated
MYOCD	down-regulated		GPR65	down-regulated		AC023590.1	down-regulated
KCNQ3	down-regulated		PLCXD3	down-regulated		AK9	down-regulated
C20orf78	down-regulated		SSTR1	down-regulated		WDR11-AS1	down-regulated
ABCG8	down-regulated		CTD-3149D2.2	down-regulated		CEP85	down-regulated
AGBL4	down-regulated		SLC5A8	down-regulated		EEF1B2	down-regulated
DEFB123	down-regulated		HOXC11	down-regulated		KHDC1	down-regulated
ANO4	down-regulated		KCNA4	down-regulated		BAIAP2L2	down-regulated
ATCAY	down-regulated		RP11-340I6.8	down-regulated		TBKBP1	down-regulated
FAM50A	down-regulated		SYT4	down-regulated		LL09NC01-251B2.3	down-regulated
RP11-23F23.3	down-regulated		ZNF415	down-regulated		KRT75	down-regulated
MYCT1	down-regulated		TRIM40	down-regulated		RP1-223B1.1	down-regulated
CNN2P12	down-regulated		AC073321.4	down-regulated		FAM175A	down-regulated
RP11-776A13.1	down-regulated		GMNC	down-regulated		HDGF	down-regulated
VN1R2	down-regulated		AC092687.4	down-regulated		KIAA0319L	down-regulated
RP11-384F7.2	down-regulated		C19orf45	down-regulated		RPS6KA5	down-regulated
MEIS3	down-regulated		RP5-1024C24.1	down-regulated		SLC25A16	down-regulated
ERICH6B	down-regulated		AGBL4	down-regulated		RDX	down-regulated
AC004901.1	down-regulated		RP11-616M22.9	down-regulated		NBEAL2	down-regulated
KIR2DS4	down-regulated		ROPN1L	down-regulated		RP11-77K12.7	down-regulated
CTD-2228K2.7	down-regulated		FLT3	down-regulated		RNF216P1	down-regulated
RP11-12M5.4	down-regulated		PDE1C	down-regulated		PITHD1	down-regulated
RNVU1-17	down-regulated		HAUS7	down-regulated		RP11-285C1.2	down-regulated
TRBV20-1	down-regulated		RP11-1L9.1	down-regulated		CITF22-92A6.2	down-regulated
COL22A1	down-regulated		FBXL13	down-regulated		MGC15885	down-regulated
TDRP	down-regulated		AP001619.3	down-regulated		CTD-2349B8.1	down-regulated
RHOJ	down-regulated		RP11-527L4.2	down-regulated		CTC-367J11.1	down-regulated
CLCN4	down-regulated		TOMM40L	down-regulated		CHD3	down-regulated
IGSF1	down-regulated		ZNF234	down-regulated		CHADL	down-regulated
IGHV3OR15-7	down-regulated		MIR521-2	down-regulated		NDUFB7	down-regulated
CD300LF	down-regulated		RPPH1-2P	down-regulated		AC093388.3	down-regulated
RP1-302G2.5	down-regulated		STARD8	down-regulated		AC007128.1	down-regulated
GPR65	down-regulated		PRKD1	down-regulated		RP11-545E17.3	down-regulated
MS4A4A	down-regulated		LINC01559	down-regulated		HSD17B13	down-regulated
GPR84	down-regulated		GSDMC	down-regulated		TESC	down-regulated
CTB-61M7.2	down-regulated		NEUROD4	down-regulated		HIST1H4B	down-regulated
LINC00865	down-regulated		MIR518A2	down-regulated		MZT2B	down-regulated
MS4A3	down-regulated		OR7G2	down-regulated		HNRNPAB	down-regulated
STMN2	down-regulated		EMR1	down-regulated		C17orf53	down-regulated
RAB9B	down-regulated		NIM1K	down-regulated		RASIP1	down-regulated
AJAP1	down-regulated		RP11-143I21.1	down-regulated		AP000439.3	down-regulated
CTD-2562J17.4	down-regulated		SLC17A4	down-regulated		SOWAHA	down-regulated
MIR323B	down-regulated		RP11-486L19.2	down-regulated		SH3RF2	down-regulated
KRTAP5-11	down-regulated		HOXD9	down-regulated		NR1H2	down-regulated
NMUR1	down-regulated		RP11-12M5.4	down-regulated		PIWIL3	down-regulated
CTPS2	down-regulated		NPHP1	down-regulated		YIF1A	down-regulated
TWIST1	down-regulated		GPR148	down-regulated		RP11-427J23.1	down-regulated
TEX33	down-regulated		AC091633.3	down-regulated		TGM1	down-regulated
ARHGAP42P2	down-regulated		TRBV24-1	down-regulated		ENTPD6	down-regulated
SLITRK5	down-regulated		RASGRP2	down-regulated		TRABD	down-regulated
EMX1	down-regulated		IGHGP	down-regulated		TCERG1	down-regulated
TBX5	down-regulated		RABGGTB	down-regulated		TMCO4	down-regulated
SMKR1	down-regulated		DPPA4	down-regulated		KCMF1	down-regulated
OR5M3	down-regulated		OR5H1	down-regulated		CSNK1A1	down-regulated
OR11L1	down-regulated		ANO4	down-regulated		RALA	down-regulated
SLC35F4	down-regulated		GPR63	down-regulated		B3GALT6	down-regulated
AC006372.6	down-regulated		CACNG8	down-regulated		NOLC1	down-regulated
LA16c-380A1.2	down-regulated		CTD-2297D10.2	down-regulated		CXXC5	down-regulated
RDH12	down-regulated		GP2	down-regulated		NSD1	down-regulated
WSCD1	down-regulated		CHMP1B2P	down-regulated		IGSF8	down-regulated
TMEM202	down-regulated		C11orf88	down-regulated		C2orf48	down-regulated
LINC00934	down-regulated		WFDC10B	down-regulated		TANGO6	down-regulated
RP11-80F22.15	down-regulated		SRSF12	down-regulated		QDPR	down-regulated
RP11-340I6.8	down-regulated		GBP6	down-regulated		FRY-AS1	down-regulated
FCAR	down-regulated		RP11-517H2.6	down-regulated		RP11-479O9.2	down-regulated
AL132709.5	down-regulated		L3MBTL2	down-regulated		FETUB	down-regulated
MIR517B	down-regulated		CAMK4	down-regulated		CDK3	down-regulated
IRX6	down-regulated		GPR12	down-regulated		PLEKHG4	down-regulated
ARMC4P1	down-regulated		MIR520G	down-regulated		SHROOM1	down-regulated
OR7E24	down-regulated		RGS7	down-regulated		C9orf117	down-regulated
MBTPS2	down-regulated		RP11-368M16.10	down-regulated		ARMC7	down-regulated
MATK	down-regulated		RP11-164H13.1	down-regulated		C20orf27	down-regulated
HRK	down-regulated		OR5M8	down-regulated		FBXO10	down-regulated
CTD-3149D2.2	down-regulated		PKD1P1	down-regulated		TAF7L	down-regulated
NLRP9	down-regulated		OR2H1	down-regulated		MAP2K6	down-regulated
GZMA	down-regulated		CA4	down-regulated		TUFT1	down-regulated
AR	down-regulated		CTD-3051D23.3	down-regulated		LDHAL6A	down-regulated
RP1-203P18.1	down-regulated		H1FX-AS1	down-regulated		PAK6	down-regulated
PRKD1	down-regulated		CTD-2194D22.4	down-regulated		EXOG	down-regulated
FCRLB	down-regulated		OR7E24	down-regulated		RP11-404L6.2	down-regulated
TRAV12-3	down-regulated		AC078942.1	down-regulated		ZNF137P	down-regulated
SLC22A31	down-regulated		CA1	down-regulated		LDLRAP1	down-regulated
RP11-2C24.7	down-regulated		WT1-AS	down-regulated		TLE2	down-regulated
CTB-83J4.1	down-regulated		RP11-67P15.1	down-regulated		GTF2H3	down-regulated
TRIM40	down-regulated		LINC00898	down-regulated		MAX	down-regulated
LINC00926	down-regulated		RP11-955H22.1	down-regulated		TIMM13	down-regulated
MOXD1	down-regulated		OR14J1	down-regulated		UNQ6494	down-regulated
RP11-616M22.9	down-regulated		AL122127.2	down-regulated		FRMD4B	down-regulated
RP1-81D8.4	down-regulated		ZNF221	down-regulated		CNTF	down-regulated
RP3-470L22.1	down-regulated		LINC01163	down-regulated		EFCAB2	down-regulated
RP11-122C21.1	down-regulated		CBLN1	down-regulated		CTNNA1	down-regulated
RP11-740P5.3	down-regulated		RP11-325L12.6	down-regulated		ARL6IP1	down-regulated
RP11-783L4.1	down-regulated		MIR548A1	down-regulated		PRPSAP1	down-regulated
KCNK10	down-regulated		FCAR	down-regulated		IL20	down-regulated
RP11-698N11.2	down-regulated		RPS15A	down-regulated		LLGL1	down-regulated
ST6GALNAC3	down-regulated		C17orf77	down-regulated		RP11-459C13.1	down-regulated
AC005176.2	down-regulated		VSX2	down-regulated		XXyac-YX65C7_A.2	down-regulated
RP5-905H7.11	down-regulated		SYCN	down-regulated		SRM	down-regulated
KLK12	down-regulated		TGIF2LX	down-regulated		CCDC71	down-regulated
TYROBP	down-regulated		OR8B12	down-regulated		LARP4	down-regulated
BPIFA4P	down-regulated		GHRHR	down-regulated		CADPS2	down-regulated
GOLGA6C	down-regulated		NRN1	down-regulated		ASCC2	down-regulated
AC134300.1	down-regulated		RP11-403I13.7	down-regulated		SCRG1	down-regulated
KIF25-AS1	down-regulated		RP11-437L7.1	down-regulated		N4BP2L2	down-regulated
LINC00907	down-regulated		MIR7-2	down-regulated		RAD51D	down-regulated
CAMKV	down-regulated		POTEM	down-regulated		GTSF1L	down-regulated
RP11-3P17.4	down-regulated		CFHR2	down-regulated		CYP4F3	down-regulated
ELFN2	down-regulated		FOXD4L6	down-regulated		LRSAM1	down-regulated
RP4-604G5.1	down-regulated		LINC01104	down-regulated		GCH1	down-regulated
GUSBP12	down-regulated		AC073094.4	down-regulated		ROGDI	down-regulated
GALNT8	down-regulated		DEFB115	down-regulated		USP30	down-regulated
FCRL3	down-regulated		RP11-496B10.3	down-regulated		FADS2	down-regulated
LINC00524	down-regulated		ST8SIA3	down-regulated		KIAA0895L	down-regulated
RP5-1027G4.3	down-regulated		ADRA1B	down-regulated		RP11-23F23.2	down-regulated
CTD-2554C21.2	down-regulated		CTD-2587H24.5	down-regulated		COL7A1	down-regulated
LINC01037	down-regulated		PTGDR	down-regulated		CCL27	down-regulated
GLT1D1	down-regulated		CTB-61M7.2	down-regulated		USP31	down-regulated
HAR1A	down-regulated		CCDC129	down-regulated		XRRA1	down-regulated
DPYSL3	down-regulated		OR4D2	down-regulated		ABHD17AP4	down-regulated
FMN2	down-regulated		MIR1-1	down-regulated		RP11-161H23.9	down-regulated
RP11-734C14.2	down-regulated		SCHLAP1	down-regulated		COL28A1	down-regulated
DYNLRB2	down-regulated		SHISA8	down-regulated		CTNS	down-regulated
THSD7B	down-regulated		ABAT	down-regulated		PER1	down-regulated
RP11-383H13.1	down-regulated		AC003002.4	down-regulated		ATP2A3	down-regulated
ECEL1	down-regulated		SIAH3	down-regulated		RP11-831H9.11	down-regulated
SFTA1P	down-regulated		NLRP8	down-regulated		CA5A	down-regulated
FAM163A	down-regulated		MBD3L1	down-regulated		PROM2	down-regulated
DPPA4	down-regulated		ATCAY	down-regulated		MFGE8	down-regulated
RP1-276N6.2	down-regulated		CDC27P1	down-regulated		SNHG17	down-regulated
AC004945.1	down-regulated		MUC16	down-regulated		ZNF414	down-regulated
CDC27P1	down-regulated		AC096574.5	down-regulated		NOP58	down-regulated
RP11-340I6.7	down-regulated		MS4A4A	down-regulated		SHANK2	down-regulated
BPESC1	down-regulated		RP11-326C3.11	down-regulated		KDM4A	down-regulated
LINC01022	down-regulated		IRX6	down-regulated		MINPP1	down-regulated
CALN1	down-regulated		NLRP7	down-regulated		CDC26	down-regulated
SIGLEC10	down-regulated		OR5R1	down-regulated		TMEM181	down-regulated
ABLIM3	down-regulated		SRCIN1	down-regulated		SH2D4B	down-regulated
RP11-849I19.1	down-regulated		CDX4	down-regulated		CCDC137	down-regulated
CCND2	down-regulated		RP11-256P1.1	down-regulated		AP3S2	down-regulated
AC055876.1	down-regulated		KBTBD7	down-regulated		ABL2	down-regulated
SLC10A4	down-regulated		LA16c-2F2.8	down-regulated		CIC	down-regulated
IFNA1	down-regulated		RGPD2	down-regulated		ZSCAN25	down-regulated
GLRA2	down-regulated		SIGLEC10	down-regulated		FBXL6	down-regulated
MIR223	down-regulated		S1PR1	down-regulated		RAB3D	down-regulated
MAP1LC3B	down-regulated		MIR892C	down-regulated		KPNA6	down-regulated
AC017116.11	down-regulated		PAQR9	down-regulated		PTPN2	down-regulated
SEC14L3	down-regulated		AC009133.17	down-regulated		DENND5A	down-regulated
OR12D2	down-regulated		SLC2A3	down-regulated		LUZP1	down-regulated
AL122127.2	down-regulated		ALPL	down-regulated		UNC13B	down-regulated
RP11-1109M24.12	down-regulated		HDAC8	down-regulated		RWDD2B	down-regulated
GPR148	down-regulated		FBLL1	down-regulated		AC005618.9	down-regulated
PHF21B	down-regulated		ZNF540	down-regulated		FOXRED1	down-regulated
RP11-718B12.2	down-regulated		IGFBP1	down-regulated		RP4-536B24.3	down-regulated
OR2A14	down-regulated		TCAF1	down-regulated		RUFY1	down-regulated
RP11-196O2.1	down-regulated		KLHL15	down-regulated		CCDC124	down-regulated
RP11-320N7.1	down-regulated		KIF11	down-regulated		TJAP1	down-regulated
CTD-2194D22.5	down-regulated		CCT6B	down-regulated		ITIH4	down-regulated
ZNF136	down-regulated		RP11-196O2.1	down-regulated		VSNL1	down-regulated
AL645922.1	down-regulated		FAM57B	down-regulated		RTKN	down-regulated
RP1-90G24.10	down-regulated		TTC29	down-regulated		NEDD4	down-regulated
LINC00668	down-regulated		LINC00708	down-regulated		ZBTB7A	down-regulated
CEACAM8	down-regulated		OR2B11	down-regulated		RAB8A	down-regulated
OR5AN1	down-regulated		CTD-2319I12.5	down-regulated		MYH16	down-regulated
NT5C1A	down-regulated		DNTT	down-regulated		RFX2	down-regulated
OR6Y1	down-regulated		RP11-123B3.2	down-regulated		TMEM101	down-regulated
ABCA6	down-regulated		MIR206	down-regulated		MIR661	down-regulated
MIR379	down-regulated		KRTAP3-3	down-regulated		NDST1	down-regulated
SPACA7	down-regulated		TXNRD2	down-regulated		AMDHD1	down-regulated
AC018890.4	down-regulated		CPNE4	down-regulated		ERCC4	down-regulated
KRTAP3-3	down-regulated		SLC10A4	down-regulated		CARD10	down-regulated
LCE2B	down-regulated		ADRA1D	down-regulated		PLD1	down-regulated
LINC00272	down-regulated		RP11-629O1.2	down-regulated		CASKIN1	down-regulated
LINC00898	down-regulated		AC023824.1	down-regulated		CAP1	down-regulated
RP3-393E18.2	down-regulated		AP001628.6	down-regulated		FBXO16	down-regulated
RP11-23J9.3	down-regulated		PTPRN	down-regulated		ACIN1	down-regulated
CYTL1	down-regulated		OR10H3	down-regulated		FAM83F	down-regulated
AC009945.4	down-regulated		UCN	down-regulated		CDCA2	down-regulated
GRXCR1	down-regulated		C20orf202	down-regulated		SYNGR1	down-regulated
RP11-325O24.1	down-regulated		AC134300.1	down-regulated		RP11-1029J19.5	down-regulated
RP11-626K17.2	down-regulated		ELANE	down-regulated		RPS24	down-regulated
HS3ST2	down-regulated		CTD-2562J15.6	down-regulated		GNAL	down-regulated
KCND2	down-regulated		MIR365A	down-regulated		ADSL	down-regulated
MYH2	down-regulated		AC091878.1	down-regulated		SLC29A2	down-regulated
RP11-376N17.4	down-regulated		MIR517B	down-regulated		NEURL4	down-regulated
AC103563.9	down-regulated		OR2M1P	down-regulated		KSR1	down-regulated
RIT2	down-regulated		ANKRD66	down-regulated		TCP11L1	down-regulated
STAC2	down-regulated		ART2P	down-regulated		CELA1	down-regulated
RP11-3B12.2	down-regulated		RHOJ	down-regulated		DDX24	down-regulated
DUXAP2	down-regulated		AC006372.6	down-regulated		B4GAT1	down-regulated
OR6F1	down-regulated		MIR154	down-regulated		PRNP	down-regulated
CCDC23	down-regulated		TMEM72-AS1	down-regulated		ADAM8	down-regulated
DCAF12L2	down-regulated		DRD2	down-regulated		RP11-511B23.2	down-regulated
MIR520G	down-regulated		SGCG	down-regulated		MXD3	down-regulated
VAT1L	down-regulated		RP11-472N13.3	down-regulated		U2AF2	down-regulated
CTD-2560E9.5	down-regulated		FOXI2	down-regulated		C16orf71	down-regulated
SEMG2	down-regulated		PGR	down-regulated		LDB3	down-regulated
C20orf202	down-regulated		AC103563.7	down-regulated		SNF8	down-regulated
AC126407.1	down-regulated		ARHGAP6	down-regulated		N6AMT2	down-regulated
GREM2	down-regulated		NT5C1A	down-regulated		TFB1M	down-regulated
RP13-895J2.9	down-regulated		PLEKHA6	down-regulated		NAT10	down-regulated
OR5B3	down-regulated		ALMS1P	down-regulated		DNM2	down-regulated
ZUFSP	down-regulated		FAM19A1	down-regulated		RP11-280O1.2	down-regulated
OR10G4	down-regulated		TTF2	down-regulated		CTD-2206N4.4	down-regulated
AMER3	down-regulated		RP11-168L7.3	down-regulated		CAPN8	down-regulated
BEND4	down-regulated		SLC7A3	down-regulated		CTD-3099C6.7	down-regulated
LINC01450	down-regulated		CNTFR	down-regulated		FAM181A	down-regulated
OR10AG1	down-regulated		PITX3	down-regulated		MICALL2	down-regulated
DAB1	down-regulated		C4orf27	down-regulated		CALHM3	down-regulated
FBLL1	down-regulated		HNRNPKP3	down-regulated		STOML2	down-regulated
ATXN7L3B	down-regulated		WEE2-AS1	down-regulated		TMC7	down-regulated
AP001107.1	down-regulated		SCRT1	down-regulated		DVL3	down-regulated
VNN1	down-regulated		RP11-43F13.1	down-regulated		GBAS	down-regulated
C6orf118	down-regulated		GPR84	down-regulated		TBRG4	down-regulated
DRD2	down-regulated		RP11-632K5.3	down-regulated		ADPRHL1	down-regulated
RP11-43F13.1	down-regulated		ELL2P1	down-regulated		ARHGAP8	down-regulated
FOXC2-AS1	down-regulated		P2RX6	down-regulated		MTCH1	down-regulated
PRKG1	down-regulated		CCDC160	down-regulated		ZMIZ1	down-regulated
RP11-387A1.6	down-regulated		MAGEL2	down-regulated		GTF2E1	down-regulated
AC018685.1	down-regulated		RP11-643M14.1	down-regulated		RNF11	down-regulated
RP13-941N14.1	down-regulated		HCRTR2	down-regulated		FAM83G	down-regulated
GAMT	down-regulated		OR4F15	down-regulated		SBK1	down-regulated
MIR598	down-regulated		MIR381HG	down-regulated		MPI	down-regulated
OR1L3	down-regulated		SNHG16	down-regulated		GRAMD1C	down-regulated
MAOB	down-regulated		SV2B	down-regulated		DTD2	down-regulated
TRH	down-regulated		IL12A-AS1	down-regulated		NRL	down-regulated
RP11-433J8.2	down-regulated		AC004945.1	down-regulated		LPPR2	down-regulated
TMEM132D	down-regulated		SPNS2	down-regulated		TMEM222	down-regulated
EPHA3	down-regulated		S100Z	down-regulated		VDAC2	down-regulated
AC018865.5	down-regulated		WSCD1	down-regulated		VPS28	down-regulated
FAM24A	down-regulated		DLGAP3	down-regulated		SMPD1	down-regulated
SCG5	down-regulated		RP11-289I10.2	down-regulated		COLGALT1	down-regulated
VIP	down-regulated		SEMA3E	down-regulated		ABCA17P	down-regulated
HHLA1	down-regulated		SPESP1	down-regulated		VOPP1	down-regulated
ALMS1P	down-regulated		DEFB124	down-regulated		SNPH	down-regulated
AC023824.1	down-regulated		RP11-797A18.3	down-regulated		SEPHS1	down-regulated
CD5L	down-regulated		RP11-80F22.14	down-regulated		PVRL1	down-regulated
GRIK3	down-regulated		AC108025.2	down-regulated		CLCN3	down-regulated
OR1B1	down-regulated		ABLIM3	down-regulated		AVL9	down-regulated
OR2B11	down-regulated		AC010729.2	down-regulated		MAPKBP1	down-regulated
TRPM3	down-regulated		BPIFA1	down-regulated		RPL24P4	down-regulated
DPY19L2P1	down-regulated		OCSTAMP	down-regulated		ZNF354B	down-regulated
LCE2A	down-regulated		NCR3	down-regulated		ZNF496	down-regulated
RP5-842K16.1	down-regulated		NRG3	down-regulated		PPP1R12C	down-regulated
ZNF735	down-regulated		LINC00923	down-regulated		AUNIP	down-regulated
AC091199.1	down-regulated		TBC1D3F	down-regulated		LINC00639	down-regulated
RNU4-63P	down-regulated		IL23A	down-regulated		REXO2	down-regulated
ST8SIA3	down-regulated		RP11-637O19.3	down-regulated		PPAP2C	down-regulated
C17orf107	down-regulated		PTGIS	down-regulated		DIP2B	down-regulated
RP11-398M15.1	down-regulated		CST7	down-regulated		DCST1	down-regulated
NPPB	down-regulated		STAP2	down-regulated		PPARGC1B	down-regulated
PNOC	down-regulated		STMN2	down-regulated		PPP3CB-AS1	down-regulated
EVI2A	down-regulated		ACSF2	down-regulated		C16orf45	down-regulated
PRSS1	down-regulated		RBBP7	down-regulated		HSF1	down-regulated
NCF4	down-regulated		HYDIN	down-regulated		QPCTL	down-regulated
AC092117.1	down-regulated		EGFLAM	down-regulated		CMIP	down-regulated
LRRC26	down-regulated		AP001625.4	down-regulated		SRD5A1	down-regulated
OR8K3	down-regulated		SDSL	down-regulated		ZBED6	down-regulated
STAC3	down-regulated		GLP1R	down-regulated		SELK	down-regulated
CTB-167G5.6	down-regulated		ARHGAP40	down-regulated		PHYH	down-regulated
SLBP	down-regulated		AK5	down-regulated		ORC5	down-regulated
C16orf78	down-regulated		SDCBP2	down-regulated		DCUN1D4	down-regulated
KIR2DL4	down-regulated		RNU6-193P	down-regulated		CTD-3222D19.2	down-regulated
CTD-2532N20.1	down-regulated		CNTN5	down-regulated		GAS2L1	down-regulated
FCN1	down-regulated		NUTM2A-AS1	down-regulated		CDC42SE2	down-regulated
FAM19A1	down-regulated		HPCA	down-regulated		CACNA1D	down-regulated
RP11-394O2.3	down-regulated		CYP1B1	down-regulated		ZHX2	down-regulated
RP11-867G23.10	down-regulated		GJB6	down-regulated		LRRC37A3	down-regulated
TCP10L2	down-regulated		RP11-310H4.3	down-regulated		VGLL4	down-regulated
C5orf49	down-regulated		DEFB116	down-regulated		DCAF8	down-regulated
HEMGN	down-regulated		KLK2	down-regulated		AC034228.4	down-regulated
MBIP	down-regulated		AC003973.5	down-regulated		CELA2A	down-regulated
OR4F15	down-regulated		IRAK3	down-regulated		KLHL17	down-regulated
TMEM72-AS1	down-regulated		RP11-885B4.1	down-regulated		PARD6G	down-regulated
TRAV8-2	down-regulated		DAB1	down-regulated		TEX2	down-regulated
OR1G1	down-regulated		AC092667.2	down-regulated		NTPCR	down-regulated
RNASEH2B-AS1	down-regulated		AC018804.6	down-regulated		VSTM2L	down-regulated
CCNYL2	down-regulated		TMEM100	down-regulated		BCKDK	down-regulated
OBP2A	down-regulated		PCDHB3	down-regulated		UTP18	down-regulated
CLEC4G	down-regulated		SPNS3	down-regulated		RP11-296K13.4	down-regulated
SGCG	down-regulated		RP11-543D5.2	down-regulated		HS6ST1	down-regulated
GHRHR	down-regulated		RP11-1324A7.2	down-regulated		LSM4	down-regulated
AC091878.1	down-regulated		MARK3P3	down-regulated		GTF3C2	down-regulated
RP11-84A19.2	down-regulated		AC005176.2	down-regulated		FER1L5	down-regulated
CRHR1	down-regulated		ST8SIA2	down-regulated		AGAP5	down-regulated
EDA2R	down-regulated		RP11-495O10.1	down-regulated		BRMS1	down-regulated
UNC93B7	down-regulated		ACKR1	down-regulated		UTP11L	down-regulated
WT1-AS	down-regulated		CDKL5	down-regulated		AC008781.7	down-regulated
CTA-243E7.3	down-regulated		OVGP1	down-regulated		OXER1	down-regulated
KLHL42	down-regulated		CYP4F22	down-regulated		PDIA5	down-regulated
LINC00868	down-regulated		VIP	down-regulated		STX18-AS1	down-regulated
RP11-663P9.2	down-regulated		RP11-21B23.3	down-regulated		CTD-2192J16.20	down-regulated
MIR1179	down-regulated		ELOVL2	down-regulated		AURKB	down-regulated
MIR1324	down-regulated		CTD-2562J17.4	down-regulated		ABCA2	down-regulated
ANKRD63	down-regulated		IL18RAP	down-regulated		RP11-446N19.1	down-regulated
PPP1R9A	down-regulated		RP11-3B12.2	down-regulated		NR1D1	down-regulated
CST13P	down-regulated		KLHL42	down-regulated		RP11-71L14.3	down-regulated
GDNF	down-regulated		LAMA1	down-regulated		ACYP2	down-regulated
OR10H5	down-regulated		SPOCD1	down-regulated		KHDC3L	down-regulated
RP11-1057B8.2	down-regulated		LINC00668	down-regulated		NRBP2	down-regulated
SDCBP2	down-regulated		TRAV8-2	down-regulated		PPP3CB	down-regulated
MUC12	down-regulated		RP11-738O11.9	down-regulated		VPS9D1	down-regulated
AC011516.1	down-regulated		SP6	down-regulated		MPRIPP1	down-regulated
CLEC4GP1	down-regulated		PTPRO	down-regulated		PAIP1	down-regulated
NTNG1	down-regulated		MIR1324	down-regulated		DOCK9	down-regulated
CTD-2319I12.5	down-regulated		HCN4	down-regulated		MINK1	down-regulated
C20orf203	down-regulated		SFRP1	down-regulated		MIRLET7B	down-regulated
SPSB4	down-regulated		RPL12	down-regulated		ARHGAP1	down-regulated
OR2A12	down-regulated		DPYSL3	down-regulated		STK32C	down-regulated
RP1-34H18.1	down-regulated		RP11-731F5.2	down-regulated		SYNGAP1	down-regulated
TBC1D3F	down-regulated		EPPIN-WFDC6	down-regulated		DYX1C1	down-regulated
OR4A16	down-regulated		C9orf139	down-regulated		MKNK1	down-regulated
IGFBP1	down-regulated		TDRP	down-regulated		CORO1C	down-regulated
RP11-430H10.2	down-regulated		SEPHS1P6	down-regulated		KHSRP	down-regulated
SLC2A3	down-regulated		C7orf62	down-regulated		TMEM214	down-regulated
PTGDR	down-regulated		RP3-407E4.4	down-regulated		PIWIL4	down-regulated
AC073094.4	down-regulated		SCPEP1	down-regulated		FAM83H	down-regulated
DLX3	down-regulated		AP000708.1	down-regulated		RCE1	down-regulated
MIATNB	down-regulated		PXMP4	down-regulated		PIDD1	down-regulated
RP11-867G23.8	down-regulated		RP11-814P5.1	down-regulated		ELP4	down-regulated
TCAF1	down-regulated		BPESC1	down-regulated		ILKAP	down-regulated
AC078882.1	down-regulated		RP11-399E6.1	down-regulated		PSMC1	down-regulated
ATP4A	down-regulated		RP11-1016B18.1	down-regulated		FLYWCH1	down-regulated
HEPN1	down-regulated		RP11-451G4.2	down-regulated		ATF6	down-regulated
WFDC10B	down-regulated		RP11-550H2.2	down-regulated		AF127936.9	down-regulated
IL18RAP	down-regulated		LYPD4	down-regulated		DIS3L2	down-regulated
OR10H3	down-regulated		SMKR1	down-regulated		RP11-10J21.2	down-regulated
LRFN2	down-regulated		TPH2	down-regulated		IFT140	down-regulated
SPINT3	down-regulated		RP11-385N17.3	down-regulated		ZNF384	down-regulated
XAGE1A	down-regulated		MIR223	down-regulated		SERPINH1	down-regulated
HEYL	down-regulated		OTP	down-regulated		AC006130.3	down-regulated
FZD7	down-regulated		OR10G2	down-regulated		ACAD11	down-regulated
OTOL1	down-regulated		VAT1L	down-regulated		ZFP41	down-regulated
RP11-560J1.2	down-regulated		RP11-804M7.2	down-regulated		TEX28	down-regulated
CA1	down-regulated		FPR1	down-regulated		BHMG1	down-regulated
CSMD2	down-regulated		TEX33	down-regulated		GPATCH3	down-regulated
IFNA7	down-regulated		CSMD2	down-regulated		TMEM259	down-regulated
RP11-453N3.7	down-regulated		FOXB1	down-regulated		KDM4B	down-regulated
HLA-DRB5	down-regulated		GALNT8	down-regulated		TP53	down-regulated
INHBA-AS1	down-regulated		CEACAM8	down-regulated		CTA-228A9.4	down-regulated
KCTD19	down-regulated		LINC00551	down-regulated		HECTD4	down-regulated
MIR206	down-regulated		SPATC1	down-regulated		TBC1D24	down-regulated
RP4-555L14.4	down-regulated		RP11-306I1.2	down-regulated		XRCC6	down-regulated
RP11-174G6.1	down-regulated		PLK5	down-regulated		DHCR7	down-regulated
RP5-856G1.1	down-regulated		OR2A14	down-regulated		ZBTB17	down-regulated
KCNQ2	down-regulated		CPPED1	down-regulated		FCGBP	down-regulated
SEL1L2	down-regulated		CTD-2325K12.1	down-regulated		ZNF628	down-regulated
CTC-444N24.9	down-regulated		CCDC108	down-regulated		PKD1	down-regulated
CYYR1	down-regulated		MAGEB4	down-regulated		ZC3H7B	down-regulated
OR6T1	down-regulated		LINC00608	down-regulated		RP3-402G11.26	down-regulated
CST7	down-regulated		FCRL3	down-regulated		E4F1	down-regulated
PLXNA4	down-regulated		SHISA7	down-regulated		CERS6	down-regulated
RP11-272J7.6	down-regulated		RP3-468K18.7	down-regulated		AC004754.3	down-regulated
LINC00608	down-regulated		RP3-340N1.6	down-regulated		TRAF7	down-regulated
SPATC1	down-regulated		ALG1L9P	down-regulated		TUBB1	down-regulated
AC125634.1	down-regulated		LINC00498	down-regulated		SNAPC4	down-regulated
ST8SIA2	down-regulated		ENTPD3	down-regulated		ST14	down-regulated
TMEM252	down-regulated		RP11-89K10.1	down-regulated		PEBP1P2	down-regulated
RP11-629O1.2	down-regulated		CTD-2296D1.4	down-regulated		TNFAIP1	down-regulated
CTC-378H22.1	down-regulated		RINL	down-regulated		ITPK1	down-regulated
BNIP3P1	down-regulated		PRUNE2	down-regulated		HIST3H3	down-regulated
ROPN1B	down-regulated		RP11-452L6.1	down-regulated		FBXL19	down-regulated
ITGA5	down-regulated		DYNLRB2	down-regulated		CDC27	down-regulated
PATE3	down-regulated		RAB9B	down-regulated		NUBP1	down-regulated
DPP6	down-regulated		RP11-586D19.1	down-regulated		LMAN2	down-regulated
DLGAP3	down-regulated		FXYD6P1	down-regulated		SLC7A5	down-regulated
RP11-99E15.2	down-regulated		C1QL4	down-regulated		CYFIP1	down-regulated
AP000797.3	down-regulated		GRIA4	down-regulated		CCDC9	down-regulated
C17orf50	down-regulated		ARMC4P1	down-regulated		INTS1	down-regulated
SLC25A5P1	down-regulated		LINC00466	down-regulated		PTPN3	down-regulated
C4orf32	down-regulated		HS3ST2	down-regulated		EPN2	down-regulated
ZCCHC5	down-regulated		WBSCR17	down-regulated		USP20	down-regulated
RP11-404O13.5	down-regulated		ZNF479	down-regulated		RAB40B	down-regulated
pRNA	down-regulated		RP11-634B7.4	down-regulated		SLC20A2	down-regulated
MIR1185-2	down-regulated		OR5G1P	down-regulated		MAD1L1	down-regulated
RLN1	down-regulated		FAM163A	down-regulated		RP3-402G11.28	down-regulated
CTC-203F4.2	down-regulated		SPTBN4	down-regulated		SLC22A1	down-regulated
FAM90A28P	down-regulated		CYP46A1	down-regulated		BRAT1	down-regulated
STAP2	down-regulated		TAS2R9	down-regulated		GNA11	down-regulated
GRIA4	down-regulated		SEL1L2	down-regulated		DCAF15	down-regulated
OR8I2	down-regulated		LINC01022	down-regulated		NLRX1	down-regulated
PLK5	down-regulated		CHL1	down-regulated		TRIM35	down-regulated
CNTN4	down-regulated		CNBD1	down-regulated		RGS12	down-regulated
GRID1	down-regulated		ECEL1	down-regulated		MLYCD	down-regulated
DLC1	down-regulated		SYT14	down-regulated		LOH12CR1	down-regulated
TMEM239	down-regulated		PDZD4	down-regulated		ANO1	down-regulated
RP11-753D20.1	down-regulated		SLC24A3	down-regulated		UAP1	up-regulated
ELANE	down-regulated		CR1L	down-regulated		TPRXL	up-regulated
PRRG3	down-regulated		RP11-519G16.2	down-regulated		RP11-364P22.1	up-regulated
CLEC3A	down-regulated		FAM45A	down-regulated		GVQW1	up-regulated
PABPC1P12	down-regulated		SCTR	down-regulated		AC005339.1	up-regulated
INSC	down-regulated		OR8H2	down-regulated		HAUS5	up-regulated
RP11-81M19.1	down-regulated		ADCY1	down-regulated		ZNF358	up-regulated
MAP1LC3C	down-regulated		IL1B	down-regulated		MRPL23-AS1	up-regulated
EIF4BP6	down-regulated		AL645922.1	down-regulated		CTD-3149D2.4	up-regulated
CTD-2533K21.2	down-regulated		NANOS1	down-regulated		CRNKL1	up-regulated
RP11-56L13.1	down-regulated		FCGR2B	down-regulated		ZNF225	up-regulated
KCNIP4	down-regulated		ITK	down-regulated		ANXA2P1	up-regulated
KIF4B	down-regulated		NPM1P33	down-regulated		ZNF317	up-regulated
AC079776.2	down-regulated		MIR135A2	down-regulated		AC079951.1	up-regulated
STXBP4	down-regulated		SUCLA2P1	down-regulated		RP11-430L16.1	up-regulated
DPF3	down-regulated		GDNF	down-regulated		RP11-128L5.1	up-regulated
RP11-523O18.7	down-regulated		SCGB1D1	down-regulated		HMGN2P25	up-regulated
LCE6A	down-regulated		NPHS2	down-regulated		CLLU1	up-regulated
RP3-513G18.2	down-regulated		TMEM176B	down-regulated		LINC00520	up-regulated
EGFLAM	down-regulated		AC007395.4	down-regulated		TRRAP	up-regulated
MIR892A	down-regulated		FMN2	down-regulated		AC009303.3	up-regulated
PAQR9	down-regulated		TGFB2	down-regulated		CTD-2340D6.2	up-regulated
PLD3	down-regulated		CABIN1	down-regulated		KLHL36	up-regulated
S100Z	down-regulated		TACR1	down-regulated		TFIP11	up-regulated
AC009501.4	down-regulated		AC055876.1	down-regulated		RP11-563J2.2	up-regulated
MIR3147	down-regulated		ZSCAN18	down-regulated		KCTD18	up-regulated
OLAH	down-regulated		RP11-430C7.4	down-regulated		CSTF1	up-regulated
OR2W5	down-regulated		CAPS2	down-regulated		RP11-779O18.2	up-regulated
KLK14	down-regulated		AC079776.2	down-regulated		ZSCAN29	up-regulated
CCDC108	down-regulated		PAX4	down-regulated		MAPK7	up-regulated
GMNC	down-regulated		MYH2	down-regulated		MYH10	up-regulated
CCT8L2	down-regulated		KRTAP5-3	down-regulated		AC005522.6	up-regulated
SCRT1	down-regulated		NOVA2	down-regulated		HMGCR	up-regulated
MAS1L	down-regulated		CYTL1	down-regulated		PSMG1	up-regulated
C7orf62	down-regulated		CTD-2291D10.4	down-regulated		VPS37A	up-regulated
MBNL3	down-regulated		AC011718.4	down-regulated		AC005104.3	up-regulated
MIR365A	down-regulated		TRBV19	down-regulated		SPEN	up-regulated
LCE2D	down-regulated		CEL	down-regulated		AL589822.1	up-regulated
TFPI	down-regulated		OR2T12	down-regulated		RCN1P2	up-regulated
WFDC8	down-regulated		PCYOX1	down-regulated		DNPEP	up-regulated
CACNB4	down-regulated		RP3-393E18.2	down-regulated		PAIP1P1	up-regulated
TOX3	down-regulated		AF131216.1	down-regulated		DDX58	up-regulated
SP6	down-regulated		GRID1	down-regulated		RP11-617F23.1	up-regulated
ELL2P1	down-regulated		LINC00629	down-regulated		RP1-96H9.5	up-regulated
C7orf31	down-regulated		CTC-451A6.5	down-regulated		SPDYE3	up-regulated
IGLL5	down-regulated		RP11-424M24.3	down-regulated		MFSD8	up-regulated
PRUNE2	down-regulated		CTC-270D5.1	down-regulated		DDT	up-regulated
MRGPRG	down-regulated		MIR125B1	down-regulated		ST13P19	up-regulated
SYT14	down-regulated		APBB1	down-regulated		HNRNPU-AS1	up-regulated
CPPED1	down-regulated		SLITRK4	down-regulated		RP5-826L7.1	up-regulated
GPR123	down-regulated		EPHA10	down-regulated		SBNO1	up-regulated
PPP1R16B	down-regulated		C20orf203	down-regulated		MAP4K3	up-regulated
C9orf139	down-regulated		ADIG	down-regulated		RP11-796E2.4	up-regulated
KCNA10	down-regulated		TCF4	down-regulated		TSR3	up-regulated
AC004637.1	down-regulated		OR6W1P	down-regulated		SEC23IP	up-regulated
NPM1P33	down-regulated		LPHN1	down-regulated		CTD-2587H24.14	up-regulated
RP11-342M1.6	down-regulated		PSMA6P4	down-regulated		RP11-626G11.1	up-regulated
TNFRSF11A	down-regulated		AC009729.1	down-regulated		ZNF518A	up-regulated
GHSR	down-regulated		PRG2	down-regulated		PTPRZ1	up-regulated
CTD-2525I3.6	down-regulated		AC108142.1	down-regulated		RP5-1029F21.2	up-regulated
HSPA8P8	down-regulated		SNX18P14	down-regulated		ATP5L2	up-regulated
LYN	down-regulated		SCN3B	down-regulated		RP11-815I9.4	up-regulated
RP11-349I1.2	down-regulated		RP11-476B1.1	down-regulated		BAG5	up-regulated
SCPEP1	down-regulated		NPHS1	down-regulated		WDR33	up-regulated
ULBP2	down-regulated		GOLGA7B	down-regulated		AC092839.1	up-regulated
DBH	down-regulated		RP11-219G17.6	down-regulated		SRP72P1	up-regulated
SAGE1	down-regulated		OR6N2	down-regulated		FAM120AOS	up-regulated
SLC7A3	down-regulated		LINC01179	down-regulated		LINC01447	up-regulated
ZIM2	down-regulated		TRAF3IP3	down-regulated		MPHOSPH6	up-regulated
FLT3	down-regulated		CTD-2132N18.2	down-regulated		ANGPTL7	up-regulated
RASGRP2	down-regulated		NDUFB10	down-regulated		TMTC3	up-regulated
RP11-731F5.2	down-regulated		LINC01435	down-regulated		SCARNA14	up-regulated
C8B	down-regulated		RIC3	down-regulated		AP000892.6	up-regulated
FRG1B	down-regulated		GABRB3	down-regulated		WHSC1L1	up-regulated
FAM57B	down-regulated		LINC00524	down-regulated		RP11-138A9.2	up-regulated
RP11-13J10.1	down-regulated		RP1-90G24.10	down-regulated		BAIAP2L1	up-regulated
RP11-702L6.1	down-regulated		OR2W5	down-regulated		AURKAPS1	up-regulated
SCHLAP1	down-regulated		OR7G1	down-regulated		KIAA1161	up-regulated
AL359987.1	down-regulated		RP11-189E14.4	down-regulated		SPDYE5	up-regulated
CTD-2231E14.4	down-regulated		CABP5	down-regulated		AC009505.2	up-regulated
RP11-388E23.3	down-regulated		PDE3A	down-regulated		RP11-6O2.4	up-regulated
RP3-468K18.7	down-regulated		GRM1	down-regulated		LINC00854	up-regulated
RP11-744K17.2	down-regulated		OR2T29	down-regulated		TLR2	up-regulated
GLP2R	down-regulated		C1orf95	down-regulated		ZC2HC1C	up-regulated
MIR1323	down-regulated		ATP4A	down-regulated		FNBP4	up-regulated
JAKMIP1	down-regulated		CTD-2213F21.3	down-regulated		ZNF594	up-regulated
ALDH1A1	down-regulated		AQP10	down-regulated		RPS4XP17	up-regulated
SLC13A5	down-regulated		LDHB	down-regulated		RP11-274J2.1	up-regulated
AL132709.2	down-regulated		PRR14	down-regulated		LINC00661	up-regulated
AC138647.1	down-regulated		RP11-98L5.4	down-regulated		RP11-712L6.5	up-regulated
CACNA1E	down-regulated		DNAH6	down-regulated		RP11-309L24.10	up-regulated
CTD-2506J14.1	down-regulated		TRPM3	down-regulated		RP11-481J13.1	up-regulated
SH3GL3	down-regulated		CTC-539A10.7	down-regulated		RPL23AP53	up-regulated
GLT6D1	down-regulated		VWFP1	down-regulated		KRT8P50	up-regulated
CACNA1A	down-regulated		RP11-463C8.4	down-regulated		MTMR9	up-regulated
COL9A1	down-regulated		CNTNAP5	down-regulated		ASCC1	up-regulated
PPP1R1A	down-regulated		TNFRSF11A	down-regulated		RP13-15M17.1	up-regulated
MIR6744	down-regulated		RP11-753D20.1	down-regulated		JPH1	up-regulated
UTS2R	down-regulated		SLC6A18	down-regulated		SNRPD3	up-regulated
SLC6A18	down-regulated		OR2AG1	down-regulated		MIR6751	up-regulated
CTD-2616J11.2	down-regulated		CTD-2560E9.5	down-regulated		CBX3P9	up-regulated
C1orf162	down-regulated		CD1C	down-regulated		UFD1L	up-regulated
NRXN1	down-regulated		CALN1	down-regulated		MORN2	up-regulated
PDZD4	down-regulated		COL22A1	down-regulated		POR	up-regulated
MSNP1	down-regulated		PPP1R14A	down-regulated		EEF1DP5	up-regulated
MIR1185-1	down-regulated		SPINT3	down-regulated		R3HDM2	up-regulated
L3MBTL2	down-regulated		HN1	down-regulated		PPIP5K1	up-regulated
ST8SIA6	down-regulated		UNC93B3	down-regulated		EFTUD2	up-regulated
RP11-347D21.1	down-regulated		HRASLS	down-regulated		ZDHHC23	up-regulated
PPAPDC1A	down-regulated		MIR337	down-regulated		PAN2	up-regulated
SERPINA10	down-regulated		AC009237.13	down-regulated		RP11-536G4.1	up-regulated
FOXD4L5	down-regulated		RP11-60C6.6	down-regulated		TOMM22	up-regulated
ACE3P	down-regulated		C17orf49	down-regulated		RAD51AP1	up-regulated
SPATA19	down-regulated		RP4-764D2.1	down-regulated		NCAPD2	up-regulated
RINL	down-regulated		BIK	down-regulated		SLC22A23	up-regulated
AL132709.8	down-regulated		RIMS3	down-regulated		CHMP4B	up-regulated
KCNT1	down-regulated		TPBG	down-regulated		CACUL1	up-regulated
ABAT	down-regulated		IQCJ	down-regulated		DLG5	up-regulated
SNTG1	down-regulated		WFDC9	down-regulated		ACTL7B	up-regulated
RNMT	down-regulated		FETUB	down-regulated		SMURF2	up-regulated
IGHV3OR16-12	down-regulated		HSPD1P7	down-regulated		TEFM	up-regulated
RP11-6L6.7	down-regulated		CTD-2377D24.6	down-regulated		MIR4484	up-regulated
MSH4	down-regulated		AP000593.5	down-regulated		PTCD2P2	up-regulated
RP11-726G23.11	down-regulated		SYT13	down-regulated		APLP2	up-regulated
AP001619.3	down-regulated		FAM92A1	down-regulated		ANTXR1	up-regulated
AC079586.1	down-regulated		MIR4477B	down-regulated		WDR46	up-regulated
CTD-2270F17.1	down-regulated		DPF3	down-regulated		NPRL2	up-regulated
RP11-583F24.3	down-regulated		CTD-3193O13.8	down-regulated		OPN1SW	up-regulated
RP11-738O11.13	down-regulated		HOXC6	down-regulated		ZNF341	up-regulated
MAGEA1	down-regulated		SLC25A5P3	down-regulated		ZNF697	up-regulated
ARL5C	down-regulated		AC068446.1	down-regulated		WDR61	up-regulated
MIR7-2	down-regulated		CD109	down-regulated		SLC38A6	up-regulated
RNASE1	down-regulated		ADA	down-regulated		HNRNPLL	up-regulated
AC007395.4	down-regulated		AP000997.2	down-regulated		XAB2	up-regulated
SUSD5	down-regulated		CACNG6	down-regulated		INTS7	up-regulated
TMEM179	down-regulated		AZGP1	down-regulated		RP11-75C10.7	up-regulated
CTD-2325K12.1	down-regulated		MARCKSL1	down-regulated		RP5-991G20.2	up-regulated
SNX18P14	down-regulated		CTC-554D6.1	down-regulated		CCDC93	up-regulated
TMEM176B	down-regulated		AC005307.3	down-regulated		GBP3	up-regulated
IZUMO4	down-regulated		MGC16275	down-regulated		AC016738.3	up-regulated
LINC00395	down-regulated		ADH1B	down-regulated		PTPRK	up-regulated
AJ011931.1	down-regulated		AC002115.9	down-regulated		AC005682.6	up-regulated
AC068138.1	down-regulated		PLEKHM1P	down-regulated		CDCA8	up-regulated
FRG2C	down-regulated		HERC2P4	down-regulated		SDHCP3	up-regulated
ARMCX1	down-regulated		TBX22	down-regulated		NDUFB5	up-regulated
NLGN4X	down-regulated		ST6GALNAC3	down-regulated		PHF13	up-regulated
ELOVL2	down-regulated		FRG2B	down-regulated		AC012066.1	up-regulated
BPIFA2	down-regulated		RP11-266A24.1	down-regulated		RP11-2H8.4	up-regulated
CA14	down-regulated		LRIT2	down-regulated		RP11-152H18.4	up-regulated
PPP1R14A	down-regulated		AOC3	down-regulated		AC004623.3	up-regulated
IGSF22	down-regulated		MIR1179	down-regulated		AC018463.5	up-regulated
MIR508	down-regulated		ADRA2C	down-regulated		SLX4IP	up-regulated
PRG2	down-regulated		EMR3	down-regulated		RP11-111M22.2	up-regulated
ACTL8	down-regulated		DCD	down-regulated		NUDT16	up-regulated
LEUTX	down-regulated		PIWIL3	down-regulated		TOE1	up-regulated
AC078942.1	down-regulated		AC124997.1	down-regulated		ARID1B	up-regulated
LINC01044	down-regulated		FUOM	down-regulated		RP11-1008C21.2	up-regulated
TESC-AS1	down-regulated		GRM3	down-regulated		USP40	up-regulated
DNAJB5	down-regulated		RP11-221J22.1	down-regulated		TBK1	up-regulated
PATE1	down-regulated		LYN	down-regulated		GPN1	up-regulated
WDR72	down-regulated		DYDC2	down-regulated		ATF7IP	up-regulated
FLJ36000	down-regulated		CTD-2355J17.2	down-regulated		RP11-384M15.3	up-regulated
AC093642.1	down-regulated		HSD17B1	down-regulated		DSCAS	up-regulated
CTD-2033D24.2	down-regulated		MROH5	down-regulated		ANGPTL3	up-regulated
CHODL	down-regulated		BPIFB3	down-regulated		KLF4P1	up-regulated
IL25	down-regulated		RP11-395D3.1	down-regulated		EEF1DP7	up-regulated
CCL4	down-regulated		KRT6A	down-regulated		TRIP11	up-regulated
CTD-2331C18.5	down-regulated		FCRL5	down-regulated		RP11-430G17.1	up-regulated
MYH1	down-regulated		RP3-380B8.4	down-regulated		MRPS21P6	up-regulated
RP11-152C15.1	down-regulated		CD1E	down-regulated		ABCA1	up-regulated
ART2P	down-regulated		PLXNA4	down-regulated		AL360176.1	up-regulated
GPR32	down-regulated		ATP7A	down-regulated		C3orf49	up-regulated
PDGFD	down-regulated		OR5H14	down-regulated		PPARA	up-regulated
NOVA2	down-regulated		HMGCS1	down-regulated		MIR30D	up-regulated
UGT8	down-regulated		SLC30A3	down-regulated		CTD-2135J3.4	up-regulated
RP11-106M3.1	down-regulated		NACAD	down-regulated		PRKRA	up-regulated
CTD-2555I5.1	down-regulated		CTPS2	down-regulated		TRAV13-1	up-regulated
RP6-91H8.3	down-regulated		SLC1A4	down-regulated		WWC3	up-regulated
ZNF138	down-regulated		MYO1A	down-regulated		LINC00092	up-regulated
RTP2	down-regulated		LINC01105	down-regulated		INTS9	up-regulated
CRHR2	down-regulated		RP11-122C21.1	down-regulated		RP11-762N20.1	up-regulated
MID1	down-regulated		RP11-281O15.4	down-regulated		RP11-115J16.2	up-regulated
RP11-424M24.3	down-regulated		RP11-1134I14.2	down-regulated		RPL13AP25	up-regulated
LINC00606	down-regulated		KLK3	down-regulated		RP11-624L4.2	up-regulated
NT5E	down-regulated		OTOP1	down-regulated		PIBF1	up-regulated
RP11-804M7.2	down-regulated		RP1-203P18.1	down-regulated		MIR761	up-regulated
ITIH2	down-regulated		GRXCR1	down-regulated		MPC2	up-regulated
UNC93B3	down-regulated		NAT8L	down-regulated		C12orf54	up-regulated
HCRTR2	down-regulated		GREM2	down-regulated		CDC42P4	up-regulated
OOSP1	down-regulated		VSTM4	down-regulated		CAMK2G	up-regulated
NTM	down-regulated		CNGA3	down-regulated		RP11-895M11.3	up-regulated
KBTBD7	down-regulated		LDHAL6A	down-regulated		FBXO11	up-regulated
GAGE12C	down-regulated		AR	down-regulated		MRAP	up-regulated
HRASLS	down-regulated		ACTRT3	down-regulated		CMTM8	up-regulated
CTD-2555A7.1	down-regulated		GLT1D1	down-regulated		MIR30B	up-regulated
HERC2P4	down-regulated		RP11-80F22.15	down-regulated		ESR2	up-regulated
LINC01020	down-regulated		BEND4	down-regulated		FAM76B	up-regulated
ZNF98	down-regulated		UGT8	down-regulated		MIR556	up-regulated
CST9L	down-regulated		ZIM2	down-regulated		TNFSF15	up-regulated
RP11-383J24.1	down-regulated		CTD-2616J11.2	down-regulated		NDUFAF2	up-regulated
SHISA7	down-regulated		RP11-734C14.2	down-regulated		STAT1	up-regulated
OR5M11	down-regulated		EIF4BP6	down-regulated		PCYOX1L	up-regulated
OR2I1P	down-regulated		PPP1R16B	down-regulated		CHML	up-regulated
RP11-678G14.4	down-regulated		CCT8L2	down-regulated		RP11-115A15.2	up-regulated
SYT7	down-regulated		RP11-1J11.1	down-regulated		LINC01108	up-regulated
OR5H1	down-regulated		UBE4A	down-regulated		RP11-93O17.2	up-regulated
AC007560.1	down-regulated		RNU6-263P	down-regulated		SNRK	up-regulated
GRM3	down-regulated		GUSBP12	down-regulated		AADAC	up-regulated
KCNK18	down-regulated		PROKR2	down-regulated		EXD1	up-regulated
FUNDC2P2	down-regulated		NTMT1	down-regulated		FAM205BP	up-regulated
EIF4E1B	down-regulated		HPCAL4	down-regulated		SPTBN1	up-regulated
LRRC4B	down-regulated		CD28	down-regulated		MIR944	up-regulated
RGAG1	down-regulated		DBH	down-regulated		MIR604	up-regulated
GOT1L1	down-regulated		ANAPC4	down-regulated		RP11-1094M14.1	up-regulated
RP11-6I2.3	down-regulated		OR2J2	down-regulated		TTC3	up-regulated
CTD-2046I8.1	down-regulated		PROX1-AS1	down-regulated		NRP1	up-regulated
ENTPD3	down-regulated		RP11-552F3.10	down-regulated		C10orf32-ASMT	up-regulated
LINC01304	down-regulated		EVI2A	down-regulated		RP11-504P24.2	up-regulated
RP11-725P16.2	down-regulated		RP1-276N6.2	down-regulated		SPATS2L	up-regulated
OR9Q1	down-regulated		CDH12	down-regulated		WDR92	up-regulated
CHRNA4	down-regulated		THEM7P	down-regulated		RP1-40E16.11	up-regulated
ZNF280B	down-regulated		RP11-1057B8.2	down-regulated		AC008074.1	up-regulated
MIR548A1	down-regulated		TCP10L2	down-regulated		RP11-108O10.2	up-regulated
AP000593.5	down-regulated		MOCS1	down-regulated		FAT1	up-regulated
RYR3	down-regulated		SNED1	down-regulated		ZSCAN5A	up-regulated
TSGA13	down-regulated		MBTPS2	down-regulated		PUS10	up-regulated
SYN3	down-regulated		TMEM151B	down-regulated		MICAL1	up-regulated
KRT25	down-regulated		CPLX1	down-regulated		PELI3	up-regulated
DNTT	down-regulated		ENTPD1-AS1	down-regulated		CTA-31J9.2	up-regulated
RP11-634B7.4	down-regulated		HFE2	down-regulated		RP11-106D4.3	up-regulated
RP11-1055B8.4	down-regulated		RP11-320A16.1	down-regulated		MET	up-regulated
ADRA1B	down-regulated		CPA2	down-regulated		RMND1	up-regulated
KCNE4	down-regulated		RP11-653J6.1	down-regulated		CD180	up-regulated
RP11-157B13.3	down-regulated		KCNT1	down-regulated		VEZF1	up-regulated
MARCKSL1	down-regulated		ABCG4	down-regulated		GGTA2P	up-regulated
SUGCT	down-regulated		GALNTL6	down-regulated		WDR62	up-regulated
OR4C15	down-regulated		OBP2A	down-regulated		TES	up-regulated
CYCSP40	down-regulated		AC024560.2	down-regulated		ZC3H11A	up-regulated
REG3G	down-regulated		PDE2A	down-regulated		AC096649.1	up-regulated
ITIH5	down-regulated		CDH8	down-regulated		TFRC	up-regulated
WDR13	down-regulated		CBLN3	down-regulated		CTD-2529P6.3	up-regulated
NIM1K	down-regulated		MIR323B	down-regulated		MIR138-2	up-regulated
RP11-320A16.1	down-regulated		TMEM74	down-regulated		PAQR5	up-regulated
OR51V1	down-regulated		AC087380.14	down-regulated		ARSB	up-regulated
LRIT2	down-regulated		TMEM154	down-regulated		CTB-33O18.2	up-regulated
EIF3IP1	down-regulated		AC023590.1	down-regulated		GNS	up-regulated
ANKRD34A	down-regulated		TRIM63	down-regulated		LINC00958	up-regulated
AC002115.9	down-regulated		RP11-84A19.2	down-regulated		SH3YL1	up-regulated
OR2T1	down-regulated		OR12D2	down-regulated		RP11-649A18.12	up-regulated
RP11-575F12.2	down-regulated		MTRNR2L1	down-regulated		BEND3P3	up-regulated
RP11-693J15.5	down-regulated		AMER3	down-regulated		NCSTN	up-regulated
TCF15	down-regulated		OR2G6	down-regulated		AC004447.2	up-regulated
LINC01248	down-regulated		OR51V1	down-regulated		DUSP10	up-regulated
LINC00299	down-regulated		CCR6	down-regulated		RP11-126F18.2	up-regulated
POTED	down-regulated		AC097381.1	down-regulated		KRT16P3	up-regulated
RP11-465K16.1	down-regulated		RP13-895J2.9	down-regulated		CYSTM1	up-regulated
AC084193.1	down-regulated		OR4A16	down-regulated		ORC4	up-regulated
EXOC8	down-regulated		AC098824.6	down-regulated		PSMD7	up-regulated
ALG1L9P	down-regulated		GRIK3	down-regulated		OR2A1	up-regulated
FLG	down-regulated		DCAF12L2	down-regulated		RP11-123O10.1	up-regulated
ALPL	down-regulated		ACSS3	down-regulated		CTD-2139B15.2	up-regulated
CTD-2562J15.6	down-regulated		C17orf50	down-regulated		TCEB1P20	up-regulated
RP1-159A19.4	down-regulated		KTN1-AS1	down-regulated		MIR1252	up-regulated
HS6ST2	down-regulated		OR5M3	down-regulated		MAPRE3	up-regulated
AC009729.1	down-regulated		CCL4	down-regulated		XPO7	up-regulated
PCDH9	down-regulated		NMRK2	down-regulated		RP1-93H18.6	up-regulated
ADAMTS18	down-regulated		SHKBP1	down-regulated		AC015987.1	up-regulated
AOX3P	down-regulated		CCDC86	down-regulated		RP11-755B10.3	up-regulated
OR5H14	down-regulated		HMCN2	down-regulated		GNB5	up-regulated
OR13D1	down-regulated		RP11-384F7.2	down-regulated		ELAC1	up-regulated
CTC-235G5.2	down-regulated		EEF1A2	down-regulated		REV1	up-regulated
RP11-340I6.6	down-regulated		PRLR	down-regulated		TANC2	up-regulated
OR2L13	down-regulated		CACNA1F	down-regulated		MIR597	up-regulated
RP11-430C7.4	down-regulated		FAM50A	down-regulated		LINC01031	up-regulated
RELN	down-regulated		RAC3	down-regulated		PSPH	up-regulated
FOXB1	down-regulated		RP5-1077H22.1	down-regulated		SLC2A12	up-regulated
AC093390.1	down-regulated		ITGA8	down-regulated		CTAGE11P	up-regulated
RP11-2E11.5	down-regulated		EIF3IP1	down-regulated		TRMT112P6	up-regulated
ABCG4	down-regulated		KRT25	down-regulated		CUEDC1	up-regulated
PKD1P1	down-regulated		HS6ST2	down-regulated		FBXL5	up-regulated
NPBWR2	down-regulated		NLRP12	down-regulated		RP11-640N20.1	up-regulated
NUDT17	down-regulated		CTD-2555A7.1	down-regulated		RP11-182J1.14	up-regulated
DEFA1	down-regulated		C16orf78	down-regulated		TMEM127	up-regulated
LHFPL5	down-regulated		RAMP3	down-regulated		RP11-394A14.2	up-regulated
SERTM1	down-regulated		ARL4C	down-regulated		ZNF366	up-regulated
RP11-368M16.6	down-regulated		OR4A15	down-regulated		RP11-235G24.3	up-regulated
CACNA1F	down-regulated		ARMCX1	down-regulated		DSG1-AS1	up-regulated
AC079779.7	down-regulated		LHFPL5	down-regulated		SNRNP25	up-regulated
GJD4	down-regulated		WNT2B	down-regulated		VCX	up-regulated
PEG3	down-regulated		LRFN2	down-regulated		DLEU2	up-regulated
IL12A-AS1	down-regulated		NKAIN3	down-regulated		GRB10	up-regulated
AC004988.1	down-regulated		HCRT	down-regulated		RP11-44N12.4	up-regulated
RP11-1134I14.2	down-regulated		CLIP4	down-regulated		RNA5SP200	up-regulated
SBF1P1	down-regulated		RP11-167H9.5	down-regulated		ZNF775	up-regulated
FHL1	down-regulated		PSD2	down-regulated		BBX	up-regulated
AC011453.2	down-regulated		FCER2	down-regulated		MYBPHL	up-regulated
CCL2	down-regulated		RP11-500K19.1	down-regulated		YWHAH	up-regulated
AC010745.4	down-regulated		C4orf32	down-regulated		SENP8	up-regulated
RP13-20L14.1	down-regulated		OR6K2	down-regulated		PRDM11	up-regulated
OR1M1	down-regulated		RP1-34H18.1	down-regulated		SETX	up-regulated
GLYATL1P2	down-regulated		ADCY8	down-regulated		BACE2	up-regulated
TARM1	down-regulated		C1orf61	down-regulated		ZDHHC3	up-regulated
CTB-12A17.2	down-regulated		RP4-673D20.3	down-regulated		AC016722.4	up-regulated
RP11-715H19.2	down-regulated		CTD-3239E11.2	down-regulated		RP11-183C12.1	up-regulated
AC007381.3	down-regulated		TMEM132D	down-regulated		FAT2	up-regulated
TMEM100	down-regulated		AC073635.5	down-regulated		RP11-753D20.4	up-regulated
RP11-347H15.2	down-regulated		OR2B6	down-regulated		TFDP2	up-regulated
RP11-161M6.5	down-regulated		MIR598	down-regulated		KCTD9P1	up-regulated
RP11-572C21.1	down-regulated		CACNA1E	down-regulated		AC108676.1	up-regulated
POLG2	down-regulated		LINC00989	down-regulated		TTC21A	up-regulated
ROBO3	down-regulated		PRSS1	down-regulated		FUCA2	up-regulated
RP11-494M8.4	down-regulated		CTD-2007A10.1	down-regulated		GAPDHP24	up-regulated
RP11-60C6.6	down-regulated		UNC93B7	down-regulated		CCDC18	up-regulated
MTND1P15	down-regulated		OR6K6	down-regulated		NNT-AS1	up-regulated
ADCY1	down-regulated		ALDH5A1	down-regulated		RP11-242O24.3	up-regulated
IL17A	down-regulated		C3orf70	down-regulated		FCHO2	up-regulated
TRPC7	down-regulated		ZBBX	down-regulated		CTC-563A5.4	up-regulated
JAM3	down-regulated		PWAR1	down-regulated		YPEL5	up-regulated
TACR1	down-regulated		RP11-541G9.1	down-regulated		CTD-2201G3.1	up-regulated
BX255923.3	down-regulated		TARM1	down-regulated		RP11-458K10.2	up-regulated
FCRL5	down-regulated		KCNQ2	down-regulated		PARP9	up-regulated
RP11-627G23.1	down-regulated		MAP1LC3B2	down-regulated		LRRC57	up-regulated
REXO1L1P	down-regulated		OXR1	down-regulated		RP1-317E23.6	up-regulated
EPS8L1	down-regulated		RP11-13J10.1	down-regulated		MBNL1	up-regulated
AC092667.2	down-regulated		RP11-433J8.2	down-regulated		AL591704.5	up-regulated
CAPS2	down-regulated		HECW2	down-regulated		AC097713.3	up-regulated
EPHA1-AS1	down-regulated		GPC4	down-regulated		FAM101B	up-regulated
CD244	down-regulated		CYP4F29P	down-regulated		SLC9A3P1	up-regulated
CTC-451A6.5	down-regulated		TFPI	down-regulated		RP11-303E16.8	up-regulated
AC003973.1	down-regulated		CTD-2544N14.3	down-regulated		RPL13AP5	up-regulated
SCGB1D1	down-regulated		EXOC8	down-regulated		FGFR3	up-regulated
RP11-65F13.3	down-regulated		NLRP9	down-regulated		HSD3BP5	up-regulated
RP11-134G8.7	down-regulated		SASH3	down-regulated		LATS1	up-regulated
RP3-481A17.1	down-regulated		PNPLA4	down-regulated		PLEK	up-regulated
C1orf61	down-regulated		ROPN1B	down-regulated		CD81	up-regulated
CD52	down-regulated		FOXD4L5	down-regulated		RP11-284A20.1	up-regulated
MIR4477B	down-regulated		AC124944.5	down-regulated		ARMCX3	up-regulated
TMEM178B	down-regulated		HOPX	down-regulated		LINC00575	up-regulated
RP11-201M22.1	down-regulated		HSPA8P8	down-regulated		RP11-256K7.1	up-regulated
KB-1440D3.13	down-regulated		OR2A12	down-regulated		XCL2	up-regulated
MIR6731	down-regulated		MS4A1	down-regulated		RP11-10J21.3	up-regulated
OR2AG1	down-regulated		CTD-2194D22.5	down-regulated		THSD4	up-regulated
SUCLA2P1	down-regulated		FAM171A2	down-regulated		UCHL5	up-regulated
FXYD6P1	down-regulated		MIR6128	down-regulated		TMEM116	up-regulated
RP11-713P17.3	down-regulated		EFCAB3	down-regulated		DNA2	up-regulated
ANKRD30BP2	down-regulated		EFCC1	down-regulated		ABCA13	up-regulated
ADRB3	down-regulated		BPIFB4	down-regulated		MIR125B2	up-regulated
SLC24A4	down-regulated		ABCA9	down-regulated		PPAP2A	up-regulated
RFTN1	down-regulated		LINC01037	down-regulated		EPAS1	up-regulated
SIRPB2	down-regulated		RP11-433J20.1	down-regulated		TFDP3	up-regulated
GIMAP7	down-regulated		SS18	down-regulated		ALS2CR12	up-regulated
ADH1B	down-regulated		KCNA10	down-regulated		AC012358.8	up-regulated
RP11-305P22.9	down-regulated		LINC01055	down-regulated		PGAP3	up-regulated
HULC	down-regulated		RP11-627G23.1	down-regulated		RP11-110L15.1	up-regulated
MS4A1	down-regulated		RPL32P31	down-regulated		ATP11C	up-regulated
CTD-2083E4.6	down-regulated		HYKK	down-regulated		FLVCR2	up-regulated
TNN	down-regulated		ILDR2	down-regulated		PDE8A	up-regulated
ZNF540	down-regulated		LINC00601	down-regulated		TNFRSF21	up-regulated
RP11-259O2.1	down-regulated		KCND2	down-regulated		RP1-137D17.1	up-regulated
SRSF12	down-regulated		MBIP	down-regulated		OARD1	up-regulated
OR5AP2	down-regulated		OR6Y1	down-regulated		NDUFB4P2	up-regulated
OR7C2	down-regulated		PRSS50	down-regulated		UBBP4	up-regulated
OR2J2	down-regulated		AC078882.1	down-regulated		LINC00641	up-regulated
RGS17	down-regulated		FXYD6	down-regulated		AC098614.2	up-regulated
SLC6A1	down-regulated		TMEM179	down-regulated		RP11-323J4.1	up-regulated
PRKCB	down-regulated		KIR2DS4	down-regulated		ACTBL2	up-regulated
SPTBN4	down-regulated		MIR520C	down-regulated		DSCC1	up-regulated
GJB6	down-regulated		AC018442.1	down-regulated		HEATR5A	up-regulated
SLC25A1P3	down-regulated		RP13-20L14.1	down-regulated		ASS1P9	up-regulated
BLID	down-regulated		TMEM244	down-regulated		CAP2	up-regulated
GUSBP10	down-regulated		RP3-399L15.2	down-regulated		PPP1R2	up-regulated
RP11-467I20.3	down-regulated		ARPC5L	down-regulated		RP11-10A14.6	up-regulated
LINC00672	down-regulated		PPP1R18	down-regulated		RP11-79L9.2	up-regulated
RP11-157E21.1	down-regulated		AC055736.1	down-regulated		SLC38A9	up-regulated
RP11-403I13.5	down-regulated		ADRB3	down-regulated		PAF1	up-regulated
TNFSF11	down-regulated		RP5-1028L10.1	down-regulated		ASS1P1	up-regulated
RP11-219G17.6	down-regulated		RP11-565J7.1	down-regulated		LINC01128	up-regulated
IL2RB	down-regulated		CTB-4E7.1	down-regulated		RP11-231L11.1	up-regulated
LUM	down-regulated		NLRP5	down-regulated		RPL31P28	up-regulated
LINC00708	down-regulated		EAF1	down-regulated		RP11-184D12.1	up-regulated
CACNA2D4	down-regulated		RPL39L	down-regulated		LINC00347	up-regulated
OR10A3	down-regulated		CTB-158D10.3	down-regulated		WDR66	up-regulated
PTPRN	down-regulated		TRBV20-1	down-regulated		ENTPD5	up-regulated
PABPC1P13	down-regulated		AQP2	down-regulated		GLYATL3	up-regulated
MOCS1	down-regulated		DRICH1	down-regulated		ISPD	up-regulated
AC009237.4	down-regulated		MFNG	down-regulated		SNORA25	up-regulated
RP11-1078H9.2	down-regulated		MIR1323	down-regulated		REXO1L6P	up-regulated
RP11-444E17.6	down-regulated		MID1	down-regulated		HLA-DMA	up-regulated
MCHR2-AS1	down-regulated		ACSBG2	down-regulated		RP11-45P15.2	up-regulated
LINC00635	down-regulated		RP11-116N8.1	down-regulated		RNF32	up-regulated
PSG4	down-regulated		WDR86-AS1	down-regulated		MLK4	up-regulated
RIC3	down-regulated		AC009237.4	down-regulated		FTH1P8	up-regulated
DCANP1	down-regulated		CRB1	down-regulated		CDC42EP3	up-regulated
C1QL4	down-regulated		HCN1	down-regulated		FAM87A	up-regulated
WEE2-AS1	down-regulated		ZNF343	down-regulated		VWA1	up-regulated
RP11-256P1.1	down-regulated		BAIAP3	down-regulated		BRAP	up-regulated
OTP	down-regulated		OR2M2	down-regulated		RP11-317B17.4	up-regulated
AKR1C6P	down-regulated		KIF4B	down-regulated		RP11-142A22.3	up-regulated
TEX26	down-regulated		AC131056.3	down-regulated		TGM4	up-regulated
CTC-360J11.4	down-regulated		RP11-168J19.2	down-regulated		LASP1	up-regulated
CLEC4E	down-regulated		GOT1L1	down-regulated		MIR1288	up-regulated
OCSTAMP	down-regulated		CLEC3A	down-regulated		CLTC	up-regulated
CBLN1	down-regulated		FLI1	down-regulated		DHRS7B	up-regulated
CEND1P1	down-regulated		RP11-161M6.5	down-regulated		KRT77	up-regulated
MIR516B1	down-regulated		FAM21FP	down-regulated		RP11-609D21.3	up-regulated
AC073072.5	down-regulated		PPP1R1A	down-regulated		ST3GAL6-AS1	up-regulated
RP4-673D20.3	down-regulated		RNU4-63P	down-regulated		AC092839.3	up-regulated
AC007099.1	down-regulated		GPR123	down-regulated		C1orf111	up-regulated
AL928742.12	down-regulated		EPDR1	down-regulated		KIAA1147	up-regulated
RP11-495K9.3	down-regulated		C10orf120	down-regulated		RP11-259P6.3	up-regulated
RP11-548K12.4	down-regulated		CTD-2270F17.1	down-regulated		TM4SF20	up-regulated
C1orf189	down-regulated		RP11-264B17.3	down-regulated		RP5-1070A16.1	up-regulated
FAM110B	down-regulated		RP5-842K16.1	down-regulated		TMEM30A	up-regulated
EPPIN-WFDC6	down-regulated		TNRC6B	down-regulated		FTH1P7	up-regulated
CYP4F24P	down-regulated		ZNF630	down-regulated		S1PR3	up-regulated
ALDH5A1	down-regulated		GLP2R	down-regulated		CTC-340A15.1	up-regulated
RP6-91H8.5	down-regulated		ADAMTS18	down-regulated		KRTAP19-7	up-regulated
NLRP11	down-regulated		IL17A	down-regulated		RP11-164C12.1	up-regulated
MTRNR2L1	down-regulated		LINC00264	down-regulated		CLDN25	up-regulated
RARRES2P9	down-regulated		PHGR1	down-regulated		SNORA47	up-regulated
OR2B6	down-regulated		CTD-2515A14.1	down-regulated		LINC00474	up-regulated
CTD-2132N18.2	down-regulated		EDA2R	down-regulated		SLC4A2	up-regulated
CCR6	down-regulated		RP11-531H8.1	down-regulated		SRP54-AS1	up-regulated
MIR7160	down-regulated		KCTD17	down-regulated		FRMD8P1	up-regulated
ANGPT4	down-regulated		OR2W3	down-regulated		AC012075.2	up-regulated
RP11-395D3.1	down-regulated		KCNA2	down-regulated		NIPSNAP3B	up-regulated
RP1-97D16.1	down-regulated		LY6G6E	down-regulated		MARS	up-regulated
ANKRD66	down-regulated		RP11-211G3.3	down-regulated		CTC-336P14.1	up-regulated
C19orf45	down-regulated		LCP2	down-regulated		RPL37A	up-regulated
CTC-539A10.7	down-regulated		CAPN13	down-regulated		ZNF114	up-regulated
PPIAP17	down-regulated		CCDC105	down-regulated		RP11-369J21.12	up-regulated
CTC-523E23.15	down-regulated		AC003006.7	down-regulated		CERS3	up-regulated
SNED1	down-regulated		LEUTX	down-regulated		UBE2MP1	up-regulated
MEG8	down-regulated		CTD-2008P7.3	down-regulated		RAB4A	up-regulated
ZEB2P1	down-regulated		AC011453.2	down-regulated		TUBA3C	up-regulated
PAGE1	down-regulated		LINC00431	down-regulated		GS1-24F4.1	up-regulated
RP11-329N22.1	down-regulated		CTC-398G3.6	down-regulated		AC099314.1	up-regulated
AC145123.2	down-regulated		AC006960.5	down-regulated		TUBD1	up-regulated
RP11-67P15.1	down-regulated		RP11-81M19.1	down-regulated		MAGEA6	up-regulated
AC004076.7	down-regulated		RNASEH2B-AS1	down-regulated		RP11-434D2.12	up-regulated
MAS1	down-regulated		MIR516B1	down-regulated		SOS2	up-regulated
TRPV6	down-regulated		RP11-25O10.2	down-regulated		GNG12-AS1	up-regulated
NPTX2	down-regulated		FAM180A	down-regulated		SLC11A2	up-regulated
MS4A6A	down-regulated		KHK	down-regulated		RP11-56P9.10	up-regulated
RP11-669M2.2	down-regulated		MAGEA1	down-regulated		AL157788.1	up-regulated
ZNF831	down-regulated		MTERF1	down-regulated		RP4-541C22.5	up-regulated
APLP1	down-regulated		LINC00935	down-regulated		CATSPER3	up-regulated
AC097374.2	down-regulated		STXBP4	down-regulated		STX7	up-regulated
KRTAP16-1	down-regulated		KB-1440D3.13	down-regulated		AC005703.2	up-regulated
HMP19	down-regulated		DNAJC27-AS1	down-regulated		RP11-536P16.4	up-regulated
COL20A1	down-regulated		VN1R2	down-regulated		AC090587.2	up-regulated
AQP7P4	down-regulated		RP11-14P20.1	down-regulated		RP11-17A4.2	up-regulated
SNRPA1	down-regulated		SLITRK5	down-regulated		AC007899.3	up-regulated
SMIM17	down-regulated		KCNK15	down-regulated		RP11-138B4.1	up-regulated
METTL11B	down-regulated		AL132709.5	down-regulated		RP11-1140I5.1	up-regulated
DKK3	down-regulated		RGR	down-regulated		ATP13A3	up-regulated
AVPR1A	down-regulated		SNAI3	down-regulated		LAMTOR5-AS1	up-regulated
PROX1-AS1	down-regulated		SYN3	down-regulated		SNRPA	up-regulated
ILDR2	down-regulated		BDH2	down-regulated		ALDH3A2	up-regulated
ALDOC	down-regulated		JOSD2	down-regulated		RP11-265N7.2	up-regulated
PLEKHM1P	down-regulated		NRG4	down-regulated		RP11-434D2.11	up-regulated
FCER2	down-regulated		GHSR	down-regulated		UBE2R2	up-regulated
[truncated: 8,028 more rows]

## Sheet: Sheet5 Cox
Gene	HR	HR.95L	HR.95H	pvalue
ITGA5	1.28121	1.21192	1.35446	2.42225e-18
DENND1C	0.699487	0.638362	0.766465	1.84936e-14
AC107464.3	0.605979	0.531009	0.691533	1.05415e-13
ZNF540	0.372682	0.283653	0.489653	1.37103e-12
AC090948.1	0.455664	0.36543	0.568179	2.93503e-12
SQLE	1.23887	1.16636	1.31589	3.3733e-12
ZCWPW1	0.668119	0.596016	0.748946	4.46935e-12
MIR193BHG	1.36139	1.24571	1.4878	9.80048e-12
TCEA3	0.828768	0.785144	0.874815	9.913e-12
LOXL2	1.19691	1.13543	1.26171	2.37055e-11
POPDC3	1.19959	1.1365	1.26619	4.06852e-11
IL17RB	0.794467	0.741755	0.850926	5.07838e-11
CBX7	0.726574	0.660233	0.799582	6.21801e-11
SLC7A5	1.14789	1.10101	1.19677	8.9837e-11
DRC3	0.575035	0.485612	0.680925	1.39589e-10
APCDD1L	1.25531	1.17059	1.34616	1.79286e-10
TRIM38	0.699155	0.625929	0.780948	2.29724e-10
ISCU	0.683906	0.607756	0.769598	2.82473e-10
CHDH	0.783978	0.72683	0.845619	2.93358e-10
NOCT	1.29948	1.19781	1.40978	2.93665e-10
ZMYND15	0.681885	0.604913	0.768651	3.71531e-10
LGALS2	0.82861	0.780715	0.879442	6.05618e-10
RIBC1	0.614096	0.52611	0.716797	6.40862e-10
BDH2	0.775171	0.714964	0.840449	6.67594e-10
TMEM158	1.1622	1.10802	1.21903	6.79406e-10
AC135050.6	0.762015	0.69885	0.83089	7.45256e-10
TNFRSF14	0.800518	0.745648	0.859425	8.16896e-10
AMY2B	0.619468	0.531534	0.721949	8.73365e-10
WEE2-AS1	0.474768	0.373211	0.603959	1.30925e-09
OXER1	0.734131	0.664351	0.81124	1.31875e-09
AC135507.1	0.400574	0.297878	0.538674	1.41847e-09
YWHAZ	1.34793	1.22365	1.48484	1.45179e-09
CRB3	0.793039	0.735593	0.854972	1.50384e-09
NRL	0.384828	0.282326	0.524547	1.51445e-09
AC008669.1	0.566	0.470449	0.680957	1.60947e-09
MMAA	0.545652	0.448108	0.664429	1.65472e-09
ARRDC2	0.746246	0.678285	0.821017	1.87968e-09
MAP4K4	1.34141	1.21864	1.47655	2.001e-09
KLC4	0.730653	0.659313	0.809713	2.1425e-09
AGBL3	0.352865	0.250514	0.497034	2.52664e-09
ZNF684	0.549149	0.450716	0.669079	2.72708e-09
AKR1A1	0.710161	0.633925	0.795566	3.48172e-09
GALNT2	1.31315	1.19955	1.43752	3.61448e-09
MPC1	0.762671	0.696976	0.834559	3.74416e-09
LINC00941	1.28221	1.18029	1.39294	4.04885e-09
AL021328.1	0.586085	0.490248	0.700656	4.49448e-09
BDNF-AS	0.525021	0.423294	0.651195	4.53098e-09
C17orf97	0.748269	0.678907	0.824717	5.13363e-09
FOSL1	1.12379	1.08059	1.16871	5.34546e-09
NICN1	0.74548	0.675217	0.823053	6.04553e-09
CCDC13	0.363201	0.258045	0.511209	6.35035e-09
TNFRSF14-AS1	0.683392	0.600851	0.777272	6.77307e-09
AP002840.2	0.653399	0.565727	0.754657	7.06851e-09
KPNA2	1.23992	1.15238	1.3341	8.57459e-09
ERO1A	1.23776	1.15086	1.33121	9.28015e-09
MROH8	0.418786	0.311112	0.563726	9.47331e-09
SLC6A12	0.707348	0.628251	0.796404	1.04921e-08
DNAJC28	0.503931	0.398404	0.637409	1.08816e-08
AC108134.4	0.631877	0.539404	0.740204	1.29836e-08
EPB41L4A	0.689316	0.606294	0.783706	1.3303e-08
AC007114.1	0.762266	0.693971	0.837281	1.44229e-08
GAS5-AS1	0.634339	0.541796	0.742687	1.53722e-08
C10orf143	0.471959	0.363807	0.612262	1.56379e-08
CCDC86	1.31667	1.19668	1.44869	1.67194e-08
PAICS	1.30881	1.19199	1.43709	1.68682e-08
DDX21	1.27555	1.17203	1.38822	1.74189e-08
ACY3	0.832707	0.781269	0.887531	1.82868e-08
DHCR7	1.19097	1.1206	1.26576	1.86273e-08
LINC00539	0.338689	0.231967	0.49451	2.064e-08
SEPSECS	0.663369	0.57463	0.765811	2.1239e-08
ALDH2	0.859602	0.815258	0.906359	2.16494e-08
AC015908.3	0.400155	0.29015	0.551867	2.34488e-08
ZNF709	0.0623832	0.0233772	0.166472	3.02206e-08
ZNF396	0.537223	0.431156	0.669384	3.07865e-08
AREG	1.10087	1.06394	1.13908	3.38499e-08
KIF12	0.860184	0.815356	0.907477	3.48158e-08
ZFP2	0.514929	0.406682	0.651987	3.54161e-08
KCNK5	0.86702	0.824127	0.912145	3.54269e-08
OXNAD1	0.601516	0.50204	0.720704	3.56759e-08
AC040977.1	0.766314	0.696976	0.842549	3.7863e-08
MANCR	1.31325	1.19152	1.44741	3.99956e-08
AC005962.1	0.495596	0.385591	0.636986	4.20723e-08
GEMIN8	0.70643	0.623853	0.799938	4.26667e-08
BCO1	0.739169	0.663267	0.823758	4.57437e-08
NDUFA5	0.703457	0.620044	0.798091	4.703e-08
PDK2	0.728471	0.650108	0.81628	4.87305e-08
ZNF747	0.658558	0.566701	0.765305	5.04204e-08
LRRC27	0.605112	0.505093	0.724937	5.05031e-08
AC093726.2	0.637246	0.541801	0.749506	5.24183e-08
HAAO	0.79306	0.729463	0.862202	5.43649e-08
EHBP1	1.30016	1.18253	1.42948	5.79082e-08
CASC2	0.352829	0.242031	0.514349	6.0549e-08
GTF2IRD2B	0.576364	0.472102	0.703651	6.22545e-08
MTFR1L	0.705283	0.621415	0.80047	6.46387e-08
MAGIX	0.746251	0.67088	0.83009	7.12548e-08
ID2	0.845607	0.795549	0.898814	7.18997e-08
HMGA1	1.20419	1.12516	1.28877	8.09512e-08
FSCN1	1.12285	1.07617	1.17154	8.84002e-08
C1orf210	0.846456	0.796228	0.899854	9.25025e-08
SLC2A1	1.1106	1.06863	1.15422	9.45475e-08
AC021016.2	0.629635	0.53114	0.746395	9.82164e-08
LINC02166	0.64884	0.553307	0.760869	1.02061e-07
PANX1	1.26565	1.16047	1.38035	1.02496e-07
MPND	0.747443	0.671452	0.832034	1.0295e-07
SLC6A20	0.79127	0.725843	0.862593	1.05625e-07
OGG1	0.674603	0.583288	0.780213	1.12968e-07
ZNF441	0.653822	0.558818	0.764977	1.13123e-07
NEK11	0.732702	0.653068	0.822047	1.17066e-07
SPNS3	0.663067	0.569412	0.772125	1.23222e-07
PEX11G	0.748923	0.672631	0.833867	1.33249e-07
ABHD14B	0.80514	0.742805	0.872705	1.35177e-07
LINC00271	0.231807	0.134608	0.399192	1.35429e-07
WDR19	0.713133	0.628732	0.808865	1.43613e-07
REPS2	0.75177	0.675852	0.836217	1.49579e-07
AKAP5	0.613054	0.51056	0.736124	1.58768e-07
ANGPT2	1.26054	1.15597	1.37457	1.60431e-07
CCDC30	0.430471	0.313985	0.590171	1.64435e-07
ZBTB18	0.835129	0.780532	0.893545	1.76131e-07
GLB1L	0.794368	0.728618	0.866051	1.76625e-07
DNAH7	0.295677	0.187136	0.467174	1.78112e-07
SKAP1	0.840719	0.787648	0.897365	1.83771e-07
AC022382.1	0.404799	0.288119	0.56873	1.85757e-07
B9D2	0.746816	0.669022	0.833656	1.97608e-07
IFT172	0.746552	0.668653	0.833527	2.00914e-07
GTF2IRD2	0.438828	0.321495	0.598984	2.11863e-07
PSMD1	1.44941	1.25974	1.66762	2.13746e-07
MAATS1	0.706153	0.619067	0.805489	2.2066e-07
TTC21A	0.643518	0.544563	0.760455	2.28562e-07
CLUAP1	0.733901	0.652722	0.825176	2.30541e-07
CCT6A	1.25268	1.15013	1.36436	2.3427e-07
ABCB1	0.763779	0.689501	0.846058	2.43768e-07
COQ7	0.683916	0.592042	0.790047	2.44564e-07
MAP3K20	1.26876	1.15911	1.38879	2.44853e-07
FMC1	0.786461	0.717788	0.861703	2.56532e-07
KDM8	0.561906	0.451054	0.700002	2.7303e-07
TMEM143	0.688077	0.59654	0.793661	2.85379e-07
PARP3	0.794876	0.728136	0.867734	2.88817e-07
TGFBI	1.11255	1.06812	1.15883	2.90265e-07
CASC1	0.666971	0.571327	0.778626	2.92174e-07
AC025171.4	0.670437	0.575411	0.781155	2.94297e-07
TGFB1	1.21525	1.12786	1.30942	3.0576e-07
BOP1	1.233	1.13795	1.336	3.1068e-07
AC139768.1	0.669342	0.573867	0.780702	3.17441e-07
AC005083.1	0.838499	0.783649	0.897189	3.34342e-07
AL161431.1	1.10794	1.06516	1.15244	3.36528e-07
AL022316.1	0.680169	0.586502	0.788795	3.42623e-07
CCDC159	0.738123	0.656799	0.829517	3.42785e-07
SETDB2	0.664063	0.567353	0.777258	3.4365e-07
ASAP1	1.29634	1.1732	1.43241	3.46068e-07
DENND6B	0.740845	0.660105	0.83146	3.48784e-07
LINC01615	1.17231	1.10241	1.24663	4.00902e-07
PCSK4	0.739499	0.657771	0.831382	4.40944e-07
AC090948.2	0.521231	0.404694	0.671325	4.50297e-07
HMGA2	1.16286	1.09663	1.2331	4.58741e-07
TTC38	0.776051	0.703083	0.856592	4.84148e-07
IL11	1.18266	1.10784	1.26252	4.85855e-07
MITF	0.794828	0.72677	0.869259	4.96196e-07
ARID3A	1.24272	1.1417	1.35268	5.07594e-07
COA3	0.774729	0.701261	0.855894	5.13867e-07
MYOSLID	1.18925	1.11137	1.27259	5.28759e-07
AL121895.2	0.713945	0.625806	0.814498	5.3869e-07
SMDT1	0.760519	0.683239	0.846541	5.52504e-07
SLC25A35	0.750359	0.67056	0.839653	5.54576e-07
CKAP4	1.25878	1.15025	1.37755	5.6473e-07
ETFBKMT	0.464271	0.343576	0.627365	5.87759e-07
N4BP2L1	0.760828	0.683387	0.847044	6.00907e-07
AC079949.2	1.29392	1.16922	1.43193	6.2504e-07
DOCK8	0.795907	0.727542	0.870695	6.30238e-07
FMO4	0.798166	0.7304	0.872219	6.35629e-07
PSMD11	1.33474	1.19136	1.49536	6.3572e-07
TMEM220-AS1	0.497199	0.377625	0.654637	6.40529e-07
PTPN18	0.797534	0.729571	0.871828	6.41417e-07
BIRC5	1.15843	1.09313	1.22764	6.78022e-07
PLAU	1.12595	1.07445	1.17991	6.82873e-07
TMEM252	0.783333	0.711301	0.86266	6.98849e-07
HESX1	0.616857	0.509661	0.746598	7.03426e-07
FERMT1	1.13587	1.0801	1.19451	7.04218e-07
MTMR10	0.721075	0.633667	0.82054	7.04851e-07
CREBRF	0.698933	0.606502	0.80545	7.44304e-07
ARSI	1.13601	1.08003	1.1949	7.57247e-07
EIF3B	1.36125	1.20452	1.53837	7.7511e-07
CCDC157	0.532132	0.414261	0.683542	7.89057e-07
NUDCD1	1.32516	1.18497	1.48193	8.01843e-07
ACSM1	0.63434	0.529345	0.760162	8.20993e-07
FOXM1	1.15035	1.08797	1.2163	8.47532e-07
PGPEP1	0.823761	0.762564	0.889869	8.54335e-07
AC093726.1	0.762774	0.684756	0.849681	8.7031e-07
JADE1	0.790296	0.719435	0.868137	9.09887e-07
AGFG2	0.763704	0.685702	0.850579	9.38372e-07
TREH	0.492482	0.370875	0.653963	9.82173e-07
COL12A1	1.10711	1.06288	1.15319	1.00035e-06
COL5A3	1.13273	1.07745	1.19085	1.04812e-06
RAB36	0.829138	0.769025	0.89395	1.06426e-06
TMEM220	0.734231	0.6485	0.831296	1.07907e-06
RALGPS1	0.748041	0.665478	0.840846	1.1444e-06
TWIST1	1.14326	1.08319	1.20667	1.16369e-06
RNF157-AS1	0.753129	0.671411	0.844793	1.3106e-06
ADM	1.1138	1.06618	1.16354	1.33482e-06
GPR108	0.690298	0.593872	0.802381	1.37901e-06
EIF3J	1.40487	1.2236	1.61299	1.41429e-06
AL157394.1	0.659407	0.556668	0.781108	1.44482e-06
RUNDC3B	0.506288	0.383724	0.668001	1.48769e-06
AC079949.1	1.28212	1.15871	1.41866	1.48789e-06
TSGA10	0.609593	0.498214	0.745873	1.5232e-06
SPATA13	0.795119	0.724173	0.873016	1.52581e-06
CXCL8	1.09194	1.05346	1.13183	1.54681e-06
HSF1	1.37976	1.20944	1.57407	1.67868e-06
AC087500.1	0.560209	0.441838	0.710292	1.71364e-06
ZNF596	0.545673	0.425726	0.699414	1.72812e-06
ASPA	0.628104	0.519075	0.760033	1.74641e-06
DCAF13	1.32488	1.18039	1.48705	1.79897e-06
AC093010.3	0.86158	0.81038	0.916015	1.87595e-06
GABRA3	1.18889	1.10716	1.27666	1.92188e-06
SELENOK	0.747881	0.663309	0.843235	2.08654e-06
AC005332.3	0.827882	0.765705	0.895107	2.11828e-06
SLC44A4	0.92894	0.901061	0.957682	2.12454e-06
CCDC125	0.736547	0.649041	0.83585	2.15187e-06
AC010595.1	1.56916	1.30213	1.89095	2.20344e-06
SNAI2	1.10817	1.06201	1.15633	2.22705e-06
ZBED3	0.808904	0.740846	0.883213	2.25077e-06
CABLES1	0.833788	0.773278	0.899033	2.2581e-06
HK1	1.26066	1.14525	1.38769	2.26008e-06
PHLDA1	1.14905	1.0847	1.21721	2.30396e-06
AL133355.1	0.73048	0.641222	0.832161	2.32309e-06
BUB1	1.20137	1.11329	1.29642	2.33144e-06
AC133552.5	0.791786	0.718589	0.872438	2.39021e-06
TRAPPC2	0.695431	0.597832	0.808965	2.50593e-06
CCDC198	0.834249	0.773574	0.899682	2.55211e-06
AC079015.1	0.363994	0.238816	0.554786	2.60214e-06
AL583856.2	0.470576	0.343645	0.644391	2.60238e-06
AL138689.1	1.4963	1.26447	1.77064	2.70661e-06
ZNF44	0.74197	0.65495	0.840552	2.74656e-06
AP000866.2	0.664164	0.559654	0.78819	2.80374e-06
AC026704.1	0.598636	0.482902	0.742107	2.85528e-06
OGFOD1	1.52446	1.27768	1.81892	2.8746e-06
CCT4	1.26935	1.14856	1.40284	2.94283e-06
NUBP1	0.728179	0.637392	0.831896	3.02802e-06
FXYD2	0.819802	0.754118	0.891206	3.1147e-06
CCR9	0.20027	0.101834	0.393858	3.1592e-06
ZNF19	0.509514	0.383685	0.676608	3.16982e-06
ACKR3	1.09439	1.05358	1.13677	3.27981e-06
KLKB1	0.489813	0.362604	0.661651	3.2891e-06
NEK8	0.762055	0.679605	0.854508	3.30032e-06
RAD23B	1.34332	1.18602	1.5215	3.40582e-06
OVGP1	0.795935	0.722829	0.876434	3.43206e-06
CARF	0.625825	0.513425	0.762831	3.48039e-06
C21orf62-AS1	0.387998	0.260096	0.578795	3.49075e-06
PSMC1	1.37576	1.202	1.57464	3.64374e-06
SLC2A11	0.730028	0.638983	0.834045	3.65515e-06
ATAD3C	0.819531	0.753255	0.891638	3.73315e-06
CFAP69	0.605883	0.489986	0.749193	3.7337e-06
AC012467.1	0.679986	0.577417	0.800775	3.77922e-06
TEX9	0.683292	0.581271	0.803219	3.91339e-06
NOLC1	1.30331	1.16457	1.45858	3.9701e-06
WDR93	0.522456	0.396464	0.688486	4.0067e-06
AKAP7	0.764291	0.681764	0.856808	4.01128e-06
PHYKPL	0.749947	0.663564	0.847576	4.05453e-06
MSANTD3	1.30433	1.16491	1.46043	4.09716e-06
MRPL54	0.78846	0.712575	0.872427	4.16014e-06
ALDH6A1	0.821999	0.756177	0.89355	4.16337e-06
KDM5B	1.27309	1.14851	1.41119	4.32218e-06
ZC2HC1C	0.665844	0.559779	0.792005	4.34844e-06
MMP1	1.0594	1.03364	1.08581	4.3489e-06
XPC	0.779951	0.70142	0.867275	4.43507e-06
CKAP2L	1.19932	1.10968	1.2962	4.52431e-06
C9orf50	0.442416	0.311894	0.627557	4.82713e-06
CSE1L	1.25473	1.13835	1.38301	4.89628e-06
FAM161B	0.667257	0.56092	0.793752	4.92729e-06
PIH1D2	0.668032	0.561839	0.794296	4.94112e-06
KNSTRN	1.24192	1.13164	1.36296	4.96179e-06
FAM83A	1.07767	1.0436	1.11284	5.01277e-06
TPK1	0.718881	0.623783	0.828477	5.13747e-06
SPATA6L	0.609237	0.49231	0.753934	5.16964e-06
AC087854.1	0.296713	0.175884	0.500548	5.26967e-06
CRYL1	0.854746	0.798871	0.914528	5.3571e-06
CACNA1D	0.76349	0.679708	0.857599	5.35815e-06
MAP2K1	1.38224	1.20229	1.58914	5.40013e-06
WDR43	1.29305	1.15749	1.44449	5.41108e-06
DYNC2LI1	0.787191	0.71001	0.872763	5.49872e-06
IMPDH1	1.2065	1.11253	1.3084	5.68677e-06
ACBD4	0.824078	0.757982	0.895939	5.73519e-06
ZNF763	0.617684	0.501406	0.760928	5.96787e-06
AC012409.3	0.361089	0.232029	0.561935	6.35415e-06
CKAP5	1.26573	1.14257	1.40217	6.43397e-06
WDR78	0.691966	0.589675	0.812002	6.43526e-06
ADAM17	1.20254	1.10992	1.30288	6.46631e-06
OMA1	0.738512	0.647333	0.842534	6.53165e-06
NOTCH3	1.13652	1.07492	1.20165	6.75889e-06
ATP6V0E2-AS1	0.655955	0.545922	0.788167	6.76623e-06
ABCE1	1.32369	1.17151	1.49565	6.79114e-06
TCP1	1.29701	1.15803	1.45266	6.88444e-06
CIITA	0.842585	0.781944	0.907929	6.97259e-06
PTDSS1	1.20771	1.11218	1.31143	7.15691e-06
SUOX	0.807532	0.735414	0.886722	7.5063e-06
LINC01506	0.559388	0.433718	0.721472	7.65486e-06
KIF3C	1.19083	1.10299	1.28567	7.92702e-06
CCDC40	0.739727	0.648041	0.844385	7.99653e-06
COL6A1	1.11163	1.06112	1.16454	8.18471e-06
ZNF214	0.703336	0.602552	0.820977	8.20456e-06
COL4A6	1.11611	1.0635	1.17132	8.22604e-06
LRP2BP	0.538834	0.410468	0.707346	8.43502e-06
CCT5	1.22603	1.12076	1.34119	8.62332e-06
LNCAROD	1.17521	1.09452	1.26185	8.64444e-06
LDLR	1.13198	1.07176	1.19558	8.80633e-06
CASC8	1.22414	1.11964	1.33839	8.90794e-06
KLHDC7A	0.883724	0.836814	0.933264	8.91895e-06
GSTK1	0.81383	0.743111	0.891279	8.93251e-06
PWP1	1.45029	1.23071	1.70904	9.06744e-06
ZNF76	0.767731	0.683139	0.862798	9.09658e-06
AL109947.1	0.338421	0.209562	0.546513	9.38755e-06
Z97989.1	0.516679	0.385772	0.692008	9.4397e-06
SLC1A1	0.867489	0.814583	0.923831	9.52907e-06
CCDC160	0.776448	0.694167	0.868483	9.54827e-06
AL591895.1	0.880174	0.831807	0.931354	9.59416e-06
USP4	0.73006	0.635093	0.839228	9.64002e-06
BLOC1S1	0.79181	0.714024	0.878071	9.66487e-06
RASSF1-AS1	0.522052	0.391429	0.696264	9.68777e-06
PSMD7	1.33333	1.17348	1.51496	1.01001e-05
NRARP	1.10944	1.05944	1.16179	1.01213e-05
EIF2S1	1.30507	1.15952	1.46888	1.01795e-05
NFIB	0.853909	0.796068	0.915951	1.0184e-05
DHRS7B	0.76357	0.677314	0.86081	1.0307e-05
RAN	1.28781	1.15072	1.44124	1.05969e-05
NAA60	0.729425	0.633822	0.839447	1.07468e-05
FHIT	0.747166	0.656195	0.850748	1.08179e-05
Z98884.1	0.577923	0.452627	0.737904	1.09407e-05
DNAAF4	0.593889	0.470738	0.749259	1.10987e-05
AC007485.1	0.7116	0.611345	0.828297	1.12622e-05
AC103760.1	0.61841	0.49897	0.766439	1.13706e-05
AL391834.2	0.776464	0.693457	0.869406	1.15452e-05
CUBN	0.686619	0.580352	0.812344	1.17306e-05
TEX264	0.786558	0.706411	0.875798	1.19431e-05
CFAP70	0.664724	0.553581	0.79818	1.2157e-05
AC134312.5	1.2964	1.15398	1.4564	1.23146e-05
FAM104A	1.43232	1.21903	1.68292	1.25664e-05
KANSL1L	0.771628	0.686868	0.866847	1.26055e-05
TMEM140	0.830898	0.764501	0.903062	1.3033e-05
C11orf54	0.830575	0.764015	0.902935	1.32628e-05
AC025171.2	0.727728	0.630702	0.83968	1.34098e-05
AC245041.1	1.10077	1.05415	1.14944	1.36958e-05
SPART-AS1	0.507111	0.373285	0.688914	1.40077e-05
APCDD1L-DT	1.32433	1.16662	1.50335	1.41007e-05
HSD3B7	0.838966	0.775026	0.908181	1.41723e-05
MRPS36	0.772236	0.687171	0.867832	1.42086e-05
CYP4V2	0.814835	0.742827	0.893824	1.4394e-05
SMIM2-AS1	0.729199	0.632226	0.841048	1.44087e-05
CLYBL	0.741324	0.647541	0.84869	1.44217e-05
NME9	0.539594	0.408283	0.713137	1.44973e-05
SLC16A1	1.09788	1.05245	1.14528	1.48586e-05
PROM1	0.8976	0.854743	0.942606	1.50541e-05
CYFIP2	0.860293	0.803601	0.920985	1.5149e-05
NPRL2	0.772706	0.687487	0.868488	1.52579e-05
VDAC2	1.25908	1.13412	1.39781	1.55993e-05
PYROXD2	0.83748	0.77263	0.907772	1.61009e-05
ZNF442	0.417522	0.280622	0.621208	1.64412e-05
AC009806.1	0.406278	0.269652	0.612128	1.65629e-05
HJURP	1.16553	1.08701	1.24972	1.67195e-05
STRAP	1.26473	1.13644	1.4075	1.67927e-05
TPM4	1.21161	1.11018	1.3223	1.6834e-05
AL589739.1	0.332407	0.201283	0.548951	1.68348e-05
GLOD5	0.75653	0.666177	0.859137	1.71088e-05
TMEM82	0.761252	0.671892	0.862497	1.85366e-05
AC005740.4	0.386932	0.25041	0.597886	1.897e-05
HTR7	1.15656	1.08196	1.23629	1.90446e-05
GALNT16	0.693431	0.586234	0.820229	1.92989e-05
DENND2D	0.81143	0.737254	0.893069	1.93622e-05
CPO	0.378539	0.242181	0.591673	2.01745e-05
YWHAQ	1.25942	1.1327	1.40032	2.01867e-05
FAM83D	1.11491	1.06051	1.1721	2.02852e-05
CRBN	0.737608	0.641249	0.848447	2.03638e-05
RBKS	0.769337	0.681883	0.868007	2.05213e-05
KIAA1211L	0.85114	0.790288	0.916679	2.05705e-05
FUCA1	0.878725	0.827957	0.932605	2.06323e-05
PLLP	0.842079	0.777982	0.911458	2.08946e-05
CCDC153	0.723718	0.623558	0.839966	2.09441e-05
AC097359.2	0.647086	0.529513	0.790765	2.0948e-05
AC093495.1	0.562691	0.431733	0.733373	2.09836e-05
CDCA5	1.14792	1.07722	1.22326	2.10755e-05
NDUFA2	0.810545	0.735709	0.892992	2.13921e-05
ADA	1.14599	1.07618	1.22033	2.14406e-05
ANKRD24	0.648991	0.531403	0.792597	2.24515e-05
LBX2-AS1	0.841921	0.777523	0.911654	2.25323e-05
CRIP3	0.671721	0.558813	0.807443	2.25646e-05
MYC	1.1214	1.06351	1.18243	2.26199e-05
HCG14	0.543939	0.41034	0.721035	2.29198e-05
UCK2	1.18619	1.09605	1.28375	2.29277e-05
FAM83A-AS1	1.1156	1.06049	1.17358	2.31722e-05
LHPP	0.801031	0.722794	0.887736	2.32775e-05
TMEM243	0.820459	0.74849	0.899347	2.39153e-05
TADA2B	0.714945	0.611807	0.835471	2.4268e-05
RNF5	0.804461	0.727103	0.890048	2.46478e-05
YARS2	1.30964	1.1553	1.4846	2.48144e-05
PSMB8-AS1	0.83674	0.770075	0.909176	2.57942e-05
LINC02532	0.804562	0.726945	0.890465	2.65371e-05
GKAP1	0.762157	0.671392	0.865193	2.69021e-05
CFAP99	0.224808	0.111977	0.451329	2.70196e-05
NCL	1.2966	1.14833	1.46401	2.76045e-05
LINC02428	1.23188	1.1174	1.35809	2.78407e-05
TTBK1	0.467594	0.327672	0.667265	2.7907e-05
ITGA9-AS1	0.463755	0.323484	0.664852	2.90206e-05
DHX58	0.826744	0.756109	0.903977	2.97438e-05
NCAPH	1.15289	1.07837	1.23257	3.00875e-05
HEMK1	0.707031	0.600702	0.832181	3.05626e-05
AC036176.1	0.749414	0.654315	0.858335	3.0958e-05
AC087477.2	0.511273	0.372864	0.701058	3.11333e-05
LRP8	1.1806	1.09182	1.2766	3.15093e-05
GALM	0.885916	0.836788	0.937928	3.16181e-05
SARM1	0.683322	0.571069	0.81764	3.19849e-05
BLOC1S5	0.763378	0.672132	0.867012	3.22328e-05
RGS20	1.17051	1.08675	1.26072	3.23936e-05
SCIN	0.883909	0.833937	0.936877	3.24011e-05
SELENOI	1.20983	1.10561	1.32387	3.40728e-05
GJB2	1.05707	1.02961	1.08526	3.58763e-05
MACC1	0.884115	0.833799	0.937467	3.78984e-05
MFAP5	1.09966	1.05106	1.1505	3.79605e-05
MAST3	0.755722	0.661431	0.863455	3.80269e-05
PTHLH	1.05804	1.02998	1.08687	3.89086e-05
MRPS25	0.824381	0.751914	0.903831	3.89162e-05
CCT2	1.18569	1.09319	1.28603	3.96138e-05
AR	0.826051	0.754089	0.904882	3.96972e-05
TOP1MT	1.21532	1.10735	1.3338	3.98575e-05
AC018926.1	0.513346	0.373283	0.705963	4.09783e-05
ARHGAP26	0.827498	0.755664	0.906159	4.37387e-05
ALKBH7	0.824181	0.751185	0.904271	4.37705e-05
P4HTM	0.856893	0.795707	0.922785	4.38947e-05
TRIM16	1.1464	1.0735	1.22424	4.58606e-05
OSBPL7	0.82739	0.755326	0.906331	4.5957e-05
METTL7A	0.908727	0.867832	0.951548	4.62137e-05
RCOR1	1.21483	1.10617	1.33417	4.69153e-05
LINC01836	0.798254	0.716172	0.889743	4.69813e-05
XPOT	1.20231	1.10022	1.31388	4.70962e-05
HNF1B	0.91082	0.870725	0.952761	4.76787e-05
LMO2	0.825045	0.75197	0.905221	4.81649e-05
CDH6	0.85824	0.797222	0.923927	4.85098e-05
GEMIN7-AS1	0.652501	0.531035	0.801752	4.85762e-05
B4GALNT1	1.15291	1.07635	1.23491	4.92982e-05
MAMDC2-AS1	0.12846	0.0476789	0.346109	4.94757e-05
EIF4A3	1.27615	1.13428	1.43577	5.00496e-05
ALPK1	0.728614	0.625214	0.849114	5.02324e-05
USP14	1.28726	1.1393	1.45444	5.05062e-05
FAM126A	1.20613	1.10145	1.32076	5.21046e-05
IGF2BP3	1.13728	1.06852	1.21045	5.2767e-05
IL1B	1.10574	1.05311	1.161	5.34726e-05
FAM47E	0.501674	0.358965	0.701119	5.36604e-05
PUF60	1.28095	1.13584	1.44459	5.42548e-05
TMEM175	0.800389	0.718221	0.891956	5.60537e-05
CNTN4	0.702843	0.592012	0.834422	5.63954e-05
ABHD11	0.875169	0.820162	0.933865	5.67724e-05
HBEGF	1.11589	1.05776	1.17722	5.88735e-05
TSPAN33	0.889606	0.840245	0.941866	5.9113e-05
NEIL3	1.19624	1.09607	1.30556	5.92174e-05
SULT1C2	0.857325	0.795271	0.924221	5.92746e-05
AC002451.1	0.364473	0.222664	0.596596	5.96216e-05
NEK5	0.59806	0.465128	0.768984	6.12121e-05
COLQ	0.650762	0.527314	0.80311	6.25432e-05
STK3	1.37543	1.17648	1.60802	6.36422e-05
AC007036.1	0.452994	0.30716	0.668066	6.47233e-05
WDR48	0.752062	0.653863	0.865007	6.57038e-05
INCA1	0.775784	0.684842	0.878803	6.58569e-05
ZNF555	0.536421	0.395005	0.728467	6.6341e-05
ERBB3	0.886943	0.836162	0.940808	6.65395e-05
ZBED3-AS1	0.398563	0.253532	0.626558	6.7336e-05
TUBA1C	1.17603	1.08583	1.27373	6.82882e-05
LCA5L	0.585903	0.450319	0.76231	6.8619e-05
SPATA12	0.46702	0.320936	0.6796	6.94923e-05
DDO	0.827157	0.753279	0.908281	7.02976e-05
TAF2	1.25643	1.12258	1.40625	7.13634e-05
PAXIP1-AS2	0.752591	0.654088	0.865928	7.14988e-05
SEPSECS-AS1	0.561583	0.42235	0.746716	7.21502e-05
AC012313.6	0.627781	0.498792	0.790126	7.26862e-05
TMEM219	0.825338	0.750627	0.907484	7.33015e-05
KLHDC1	0.681401	0.563591	0.823837	7.46936e-05
KCTD6	0.763497	0.667991	0.872657	7.56614e-05
DENR	1.34982	1.1632	1.56638	7.7761e-05
SMAD9	0.817308	0.739476	0.903332	7.77935e-05
SPATA6	0.807239	0.725867	0.897732	7.81427e-05
AQP7	0.789412	0.701974	0.887742	7.88027e-05
AC011374.2	0.747372	0.646706	0.863708	7.98112e-05
PREP	1.26194	1.12419	1.41658	7.98718e-05
NIP7	1.2786	1.13156	1.44475	8.05208e-05
ENTPD3-AS1	0.70989	0.598678	0.841762	8.09892e-05
DZANK1	0.702606	0.589388	0.837572	8.24854e-05
LYAR	1.22908	1.10914	1.362	8.25202e-05
AC087501.4	0.539914	0.397074	0.734137	8.4508e-05
RBPMS	0.88936	0.838858	0.942903	8.45925e-05
DPP3	1.29146	1.13681	1.46716	8.48397e-05
CCT7	1.2967	1.13897	1.47628	8.62603e-05
RARA-AS1	0.779781	0.688678	0.882936	8.70608e-05
AC008758.2	0.21647	0.100701	0.465334	8.88615e-05
LRFN4	1.14222	1.06871	1.22079	8.93908e-05
ZCWPW2	0.406945	0.259505	0.638155	8.97473e-05
ATPAF1	0.757312	0.658797	0.870558	9.2473e-05
MAD2L1	1.16255	1.07788	1.25386	9.46572e-05
CCDC96	0.768372	0.673089	0.877142	9.59772e-05
TAF1A	1.29237	1.13603	1.47021	9.66916e-05
GJA1	1.07758	1.03784	1.11884	9.7335e-05
AC010226.1	0.577934	0.438503	0.761701	9.92984e-05
CDK20	0.786736	0.697222	0.887743	9.93838e-05
METTL27	0.889268	0.838183	0.943467	0.000101152
TM4SF19	1.14172	1.06789	1.22066	0.000102042
LAMC2	1.07146	1.03476	1.10947	0.000103856
CDPF1	0.773786	0.679757	0.880822	0.000104591
[truncated: 902 more rows]

## Sheet: Sheet6 Riskscore
ID	Riskscore
TCGA-XF-AAMQ	0.753702
[truncated: 2,282 more rows]
